# Supplementary material for: Mining the Australian Grains Gene Bank for Rust Resistance in Barley
Source: Int J Mol Sci. 2023 Jun 29;24(13):10860. doi: 10.3390/ijms241310860 (PMC10342048; doi:10.3390/ijms241310860)
Supplement: Supplementary file 1 [file ijms-24-10860-s001.zip › Table S1.xlsx]

## Sheet: Supp Table 1
Supplementary Table 1 - Passport data information for the 287 genetically non-redundant Eastern European barley accessions used for phenotypic assessment and GWAS
Accession Name	Serial #	Population	Country of Origin	Identifier	Historical info	Source of Origin	GPS data available	Cultivation info
CIKLON	5	2	FORMER SOVIET UNION	K 26049	FOGEL' ZANGER GOL'D/POISK	Krasnodarskij kraj, Russian Federation	45.00000000, 40.00000000	ADVANCED CULTIVAR
BLACK RUSSIAN	10	3	FORMER SOVIET UNION	CIho 2202	selection from CI 705 PI 27829	Tbilisi, Georgia	41.71666667, 44.78333333	LANDRACE
BROACH	11	2	Russia	PI 41249	-	Sankt-Peterburg, Russian Federation	59.91666700, 30.25000000	LANDRACE
CASPIAN	16	1	RUSSIA	PI 94876	-	Krasnodarskij kraj, Russian Federation	45.30000000, 40.90000000	LANDRACE
GECHOSLOVATZKIY	17	2	RUSSIA	CIho 6512	-	-	-	LANDRACE
CHERNISHEVKA	18	1	RUSSIA	PI 58284	-	Sankt-Peterburg, Russian Federation	60.36666667, 28.60000000	LANDRACE
D461	19	3	FORMER SOVIET UNION	PI 94883	-	-	-	LANDRACE
H. 1108	24	2	HUNGARY	CIho 10464	-	-	-	ADVANCED CULTIVAR
DON	26	1	FORMER SOVIET UNION	CIho 6274	-	-	-	Unknown
EIDER	28	1	RUSSIA	CIho 993	-	-	-	Unknown
EUROPEUM 353/133	30	1	UKRAINE	VDB 2038.1	-	Kharkivska oblast, Ukraine	49.50000000, 36.50000000	Unknown
EVAIS	31	1	GREECE	SWB 1032	-	-	-	Unknown
EXEDRA	32	2	FORMER SOVIET UNION	selection from PI 38535	-	Avtonom- Respublika Krym, Ukraine	45.50000000, 34.83333333	Unknown
FERTODI 4	34	2	HUNGARY	PI 232913	-	Győr-Moson-Sopron, Hungary	-	ADVANCED CULTIVAR
FLECHE	35	3	UKRAINE	PI 38536	-	Avtonom- Respublika Krym, Ukraine	45.00000000, 34.00000000	LANDRACE
GOSPICK	38	2	YUGOSLAVIA	PI 184081	-	-	-	LANDRACE
GUREV	39	1	RUSSIA	PI 41247	-	Sankt-Peterburg, Russian Federation	59.91666700, 30.25000000	LANDRACE
HATVANI 45/25	40	3	HUNGARY	CIho 12340	-	Heves, Hungary	-	ADVANCED CULTIVAR
HUNGARY R2382	42	2	HUNGARY	VDB 584.1	-	-	-	Unknown
ILJSINECKIJ 43	43	2	Russia	SWB 2175	-	-	-	Unknown
KAZANSKIJ 6/4	46	2	Russia	K 16877	-	-	-	Unknown
KITE	47	3	RUSSIA	PI 38303	-	Sankt-Peterburg, Russian Federation	59.91666700, 30.25000000	LANDRACE
KRAGUJEVACKI 73	49	1	YUGOSLAVIA	VDB 2442.1	-	-	-	Unknown
KUROF	50	3	RUSSIA	PI 41246	-	Sankt-Peterburg, Russian Federation	59.91666700, 30.25000000	LANDRACE
LEUKADOS	51	1	GREECE	SWB 1035	-	-	-	Unknown
LION	52	1	Russia	NSB 33	-	Rostovskaja oblast', Russian Federation	47.00000000, 42.00000000	Unknown
LOUASGPATONAI UNIVERSAL	53	2	HUNGARY	PI 232917	-	-	-	ADVANCED CULTIVAR
MARTONVASARI	54	2	HUNGARY	PI 6566	-	Budapest, Hungary	-	Unknown
MARTONVASARI FB 102	56	2	HUNGARY	P 7007	-	-	-	Unknown
MURSA	58	2	YUGOSLAVIA	VDB 2380.1	-	-	-	Unknown
WEIDER	59	1	HUNGARY	QHB 207	-	Pest, Hungary	47.41666667, 19.33333333	Unknown
Nutans 115	60	2	ARMENIA	PI 327673	selection from Armenian landrace	-	-	Unknown
OMEGA (GK)	62	1	HUNGARY	-	HORPACSI/HR 312-184/M KETSOROS	-	-	Unknown
Orbit	63	1	SLOVAKIA	PI 599632	SK 783 / CE DC-74	-	-	ADVANCED CULTIVAR
PALLIDUM	64	1	FORMER SOVIET UNION	VDB 1100.1	-	-	-	Unknown
PREKOCIUS 143	67	2	Russia	VDB 376.1	-	-	-	Unknown
Radosinsky Sladar	68	1	SLOVAKIA	PI 467425	selection from landvariety origi-ting in Slovakia	-	-	ADVANCED CULTIVAR
Rapid	69	1	CZECH REPUBLIC	PI 428628	Vaoldagsen / Kneifel // Diamant /3/ De-r	-	-	ADVANCED CULTIVAR
RISK	70	1	RUSSIA	-	-	-	-	ADVANCED CULTIVAR
ROVENSKII 37	71	1	FORMER SOVIET UNION	K 27260	-	-	-	Unknown
Rumaenische Orzoika	72	3	ROMANIA	-	-	-	-	Unknown
SAIDII	73	1	FORMER SOVIET UNION	21/92	-	-	-	Unknown
SALONIKA	76	3	GREECE	NSB 84	-	-	-	Unknown
SCARAB	77	1	RUSSIA	PI 38306	-	Sankt-Peterburg, Russian Federation	59.91666700, 30.25000000	LANDRACE
SLADKO	78	2	SLOVAKIA	PI 599642	SK 2043 / Gerda // Salome	-	-	ADVANCED CULTIVAR
SMOOTH AWN	79	1	YUGOSLAVIA	VDB 206.1	-	Serbia	-	Unknown
STRANDJA 1	80	1	BULGARIA	88105150	-	-	-	Unknown
Szekacs 31	81	2	HUNGARY	-	-	-	-	LANDRACE
TAK HANNA	82	2	HUNGARY	CPI 13259	-	-	-	Unknown
TAPLANI	83	2	HUNGARY	VDB 2305.1	-	-	-	Unknown
TEMP	84	1	Russia	SWB 2495	-	Krasnodarskij kraj, Russian Federation	45.00000000, 40.00000000	Unknown
VEJEN KT 2031	86	2	BULGARIA	88105155	-	-	-	Unknown
U 463	87	2	HUNGARY	SWB 2165	-	-	-	Unknown
VYATICH	88	2	FORMER SOVIET UNION	K 26823	BRIGITTA/LUC	-	-	Unknown
VYATSKIY 1163	89	1	RUSSIA	CIho 6510	-	Sankt-Peterburg, Russian Federation	60.36666667, 28.60000000	Unknown
YUZNYJ	90	2	Russia	VDB 2037.1	-	-	-	Unknown
ZERO	91	2	Russia	CIho 1287	-	Russian Federation	-	Unknown
PI 184111	92	1	YUGOSLAVIA	CIho 9123	-	-	-	LANDRACE
PI 249934	93	1	GREECE	CIho 10797	-	Macedonia, Greece	40.63333333, 22.93333333	BREEDING LINE
MAMMOTH WINTER	94	1	UKRAINE	CIho 220	-	Khmelnytska oblast, Ukraine	49.41666667, 27.00000000	Unknown
KARNOBAT	96	1	BULGARIA	-	-	Plovdiv, Bulgaria	-	Unknown
SOFUT	98	1	RUSSIA	PI 38322	-	-	-	LANDRACE
402718 (AUS#)	99	1	BULGARIA	-	-	-	-	Unknown
RUDNICHANIN	100	2	YUGOSLAVIA	VDB 2443.1	-	-	-	Unknown
NUTANS 244	101	2	UKRAINE	CPI 70671	-	Odeska oblast, Ukraine	47.00000000, 30.00000000	Unknown
AKHELOL 1	103	1	BULGARIA	-	-	-	-	Unknown
KT 2036	104	1	BULGARIA	-	-	-	-	Unknown
YUBILET 100	105	2	BULGARIA	-	-	-	-	Unknown
KRASI 2	106	2	BULGARIA	-	-	Plovdiv, Bulgaria	42.16666667, 24.50000000	Unknown
KARPATHOS	107	2	GREECE	-	-	-	-	Unknown
KASOS	108	2	GREECE	-	-	-	-	Unknown
LOKUS	109	1	FORMER SOVIET UNION	K 23691	-	-	-	LANDRACE
METEOZ	110	1	FORMER SOVIET UNION	K 26028	-	-	-	LANDRACE
CIho 2632	114	1	RUSSIA	403043 (AUS#)	selection from PI 20375	-	-	LANDRACE
Eo Kuo ta mai	115	3	Russia	PI 64276	-	Russian Federation	-	LANDRACE
PI 467640	116	1	Russia	-	-	-	-	LANDRACE
PEVESZTEGI 8 (H.SATIVUM)	122	2	HUNGARY	CPI 13258	-	-	-	Unknown
10242 Z MANDZURJI	127	1	FORMER SOVIET UNION	PI 129464	-	-	-	BREEDING LINE
CIho 6704	129	2	FORMER SOVIET UNION	403398 (AUS#)	selection from 94806 (from USSR)	-	-	BREEDING LINE
KRASNOYARSK GOLDCOIN	130	1	RUSSIA	PI 182508	-	-	-	Unknown
Diosecky 802	131	2	SLOVAKIA	CIho 9004	selection from Opavsky Kneifel	-	-	ADVANCED CULTIVAR
PI 184050	133	2	YUGOSLAVIA	CIho 9063	-	-	-	LANDRACE
PI 184053	134	2	YUGOSLAVIA	CIho 9066	-	-	-	LANDRACE
PI 184059	135	2	YUGOSLAVIA	CIho 9072	-	-	-	LANDRACE
PI 184061	138	2	YUGOSLAVIA	CIho 9074	-	-	-	LANDRACE
PI 184067	140	2	YUGOSLAVIA	CIho 9080	-	-	-	LANDRACE
PI 184069	141	1	YUGOSLAVIA	CIho 9082	-	-	-	LANDRACE
PI 184108	142	2	YUGOSLAVIA	CIho 9121	-	-	-	LANDRACE
PI 184109	143	1	YUGOSLAVIA	CIho 9122	-	-	-	LANDRACE
Groavac-Buskat	144	2	YUGOSLAVIA	PI 184112	-	-	-	LANDRACE
VINNICKIJ-7	145	1	FORMER SOVIET UNION	HOR 8913	-	-	-	Unknown
Petro	146	2	Russia	PI 38305	-	-	-	LANDRACE
LOVAZPATANAI UNIVERSAL	148	2	HUNGARY	CPI 20834	-	-	-	Unknown
PERELOM	150	2	FORMER SOVIET UNION	K 28152	-	-	-	Unknown
MEDIKUM 8955	151	2	FORMER SOVIET UNION	CPI 70667	-	-	-	Unknown
BULGARIA 2 SH 89-27-7	153	1	BULGARIA	VDB 2446.1	-	-	-	Unknown
BULGARIA 29 H 339	154	1	BULGARIA	VDB 2448.1	-	-	-	Unknown
DES 0084	155	1	GREECE	SWB 978	-	-	-	Unknown
DES 0086	156	1	GREECE	SWB 979	-	-	-	Unknown
DES 557	157	1	GREECE	SWB 1065	-	-	-	Unknown
DES 575	158	1	GREECE	SWB 1068	-	-	-	Unknown
DES 594	160	1	GREECE	SWB 1066	-	-	-	Unknown
EX USSR BARLEY	161	2	Russia	SWB 1189	-	-	-	Unknown
GREEK G-63994	163	1	GREECE	VDB 622.1	-	-	-	Unknown
GREEK YG-1979	164	1	GREECE	VDB 623.1	-	-	-	Unknown
TRIKALON	166	2	GREECE	SWB 942	-	-	-	Unknown
U 28	167	1	HUNGARY	SWB 2164	-	-	-	Unknown
Opavsky Kneifl	169	2	CZECH REPUBLIC	PI 428626	selection from Ha-cky landrace	-	-	ADVANCED CULTIVAR
HAR'KOVSKIJ 306	172	3	UKRAINE	PI 369732	-	-	-	ADVANCED CULTIVAR
Perun	173	2	CZECH REPUBLIC	IG 38267	-	-	-	ADVANCED CULTIVAR
ZERNGRADSKIJ 86	177	2	Russia	-	-	-	-	Unknown
KUR'ER	179	2	FORMER SOVIET UNION	K 26740	KNIISH 104/TEMP	-	-	Unknown
KVANT	180	2	FORMER SOVIET UNION	K 27558	-	-	-	Unknown
ROUEN	181	2	BULGARIA	88105146	-	-	-	Unknown
ISIS (GK)	182	2	HUNGARY	-	HADMERSLEBENI//Pf6-302/ARAMIR	-	-	Unknown
OGLON	183	2	BULGARIA	-	-	-	-	Unknown
Vladivostock 1	186	2	RUSSIA	PI 190641	-	-	-	Unknown
PROCHANOVII	187	1	FORMER SOVIET UNION	16/92	-	-	-	Unknown
Skorohod	189	1	RUSSIA	-	-	-	-	unknown
MOSKOVSKII 121	192	2	FORMER SOVIET UNION	PI 345617	Maja / Viner	-	-	ADVANCED CULTIVAR
DZUGJAJ	193	2	FORMER SOVIET UNION	03C060221	-	-	-	Unknown
DEBUT	194	1	FORMER SOVIET UNION	-	-	-	-	Unknown
BEMIR 2	195	1	FORMER SOVIET UNION	-	BEMIR-2	-	-	Unknown
MONOLIT	196	1	FORMER SOVIET UNION	-	ICB-104085	-	-	Unknown
ACTIV	198	1	FORMER SOVIET UNION	-	-	-	-	Unknown
FRIBERGA	200	1	FORMER SOVIET UNION	-	-	-	-	Unknown
DONOR	202	1	FORMER SOVIET UNION	-	-	-	-	Unknown
PAX	203	2	SLOVAKIA	PI 599647	-	-	-	ADVANCED CULTIVAR
KOBECK	209	3	Russia	CIho 2436	selection from PI 38307	-	-	LANDRACE
VALENTINAE	210	1	FORMER SOVIET UNION	13/92	-	-	-	Unknown
KRASNODAR 630	211	2	FORMER SOVIET UNION	-	-	-	-	Unknown
MAMLUK	212	2	FORMER SOVIET UNION	-	-	-	-	Unknown
PRIMUS	213	1	Russia	CPI 11075	-	Czech cultivar	-	ADVANCED CULTIVAR
GALINAE	215	3	FORMER SOVIET UNION	18/92	-	-	-	Unknown
Vairogs	216	3	LATVIA	BCC 1537	Selection from Priekulu landrace	-	-	ADVANCED CULTIVAR
AIGUNII	217	2	FORMER SOVIET UNION	22/92	-	-	-	Unknown
RUSSIAN 82	218	1	Russia	WUB 1937	-	-	-	Unknown
PALLIDUM 043	219	1	UKRAINE	CIho 6518	selection from landrace	Ukraine	-	ADVANCED CULTIVAR
ZULEICHATAE	220	1	FORMER SOVIET UNION	-	-	-	-	Unknown
ABDULBASIROVII	221	1	FORMER SOVIET UNION	1992-02-01	-	-	-	Unknown
BACHTEEVII	223	1	FORMER SOVIET UNION	6/92	-	-	-	Unknown
ISMAILII	224	1	FORMER SOVIET UNION	11/92	-	-	-	Unknown
LUKJANOVAE	225	1	FORMER SOVIET UNION	17/92	-	-	-	Unknown
OBZOR	226	1	BULGARIA	-	-	-	-	Unknown
ICB-100140	227	3	FORMER SOVIET UNION	HOR 4096	-	-	-	LANDRACE
LAGUNCLIFORME-1960	229	3	FORMER SOVIET UNION	OUH663	-	-	-	Unknown
HOR 3886 AGRIOCRITHON	230	3	FORMER SOVIET UNION	OUH806	-	-	-	Unknown
STANDZHA 1	231	1	BULGARIA	-	-	-	-	Unknown
HEMUS	232	1	BULGARIA	88105151	-	-	-	Unknown
IUBILEI	233	2	BULGARIA	88105147	-	-	-	Unknown
RODON	234	2	GREECE	SWB 941	-	-	-	Unknown
Vavilon	235	2	RUSSIA	-	-	-	-	Unknown
IZGREV	237	1	BULGARIA	-	-	-	-	Unknown
KAMCHIA	238	1	BULGARIA	88105153	-	-	-	Unknown
KORTEN	239	1	BULGARIA	-	-	-	-	Unknown
AHELOI	241	1	BULGARIA	-	-	-	-	Unknown
VELEBIT	242	2	YUGOSLAVIA	VDB 2381.1	-	-	-	Unknown
F245/64	243	1	ROMANIA	HOR 7417	-	-	-	Unknown
44A	244	3	FORMER SOVIET UNION	HOR 8273	-	-	-	Unknown
44B	245	3	FORMER SOVIET UNION	HOR 8274	-	-	-	Unknown
PAVLOVICKY	246	2	CZECH REPUBLIC	HOR 11210	-	-	-	ADVANCED CULTIVAR
SKOROKHOD	247	2	FORMER SOVIET UNION	-	-	-	-	Unknown
KOMPAKT	249	2	SLOVAKIA	-	GALAN/KM-A10	-	-	ADVANCED CULTIVAR
JUBILANT	251	2	SLOVAKIA	PI 599639	SK 1952-7 / Dera	-	-	ADVANCED CULTIVAR
BIOS-1I	253	2	RUSSIA	VIR 29634	-	-	-	LANDRACE
RIKOTENSE 045	254	2	RUSSIA	CIho 6529	-	Sankt-Peterburg, Russian Federation	60.36666667, 28.60000000	BREEDING LINE
KS1294	255	2	RUSSIA	WUB 6896	-	-	-	LANDRACE
K 18250	258	2	UKRAINE	HOR 3349	-	-	-	LANDRACE
PI 251538	262	3	YUGOSLAVIA	CIho 10832	-	-	-	BREEDING LINE
HOR 1368	264	2	Russia	-	-	-	-	LANDRACE
Kubanetc	266	3	Russia	PI 372079	selection from landvariety origi-ting in Gruzii	-	-	ADVANCED CULTIVAR
JUZNYJ	267	2	UKRAINE	PI 372088	Odeskij 14 / Odeskij 9	-	-	LANDRACE
CERNOMOREC	268	2	UKRAINE	PI 372097	Juschnij / Stepovoj Medicum 2 -3	-	-	LANDRACE
Hasaviurtovskij	269	3	Russia	PI 372105	-	-	-	LANDRACE
Champean	271	1	Russia	PI 37156	-	-	-	LANDRACE
ANSKA	274	1	Russia	PI 94880	-	-	-	LANDRACE
PI 94806	280	3	FORMER SOVIET UNION	-	-	-	-	LANDRACE
LAIYA	282	1	Russia	CIho 6514	-	-	-	ADVANCED CULTIVAR
KHOLT	283	1	Russia	PI 156626	-	-	-	ADVANCED CULTIVAR
PI 94787	285	3	UKRAINE	CIho 5533	-	Kharkivska oblast, Ukraine	49.50000000, 36.50000000	LANDRACE
Cernigovskij	287	2	Russia	IG 35685	-	-	-	LANDRACE
SZEGEDI 1353	288	1	HUNGARY	VDB 2085.1	-	-	-	Unknown
Exportni Hanacky	292	1	CZECH REPUBLIC	PI 428617	Ha- VIII / Jarohnovicky	-	-	ADVANCED CULTIVAR
Hodoninsky Kvas	294	2	CZECH REPUBLIC	CIho 7782	Hodoninsky I / Starnovsky Kneifel	-	-	ADVANCED CULTIVAR
Horicky	295	2	CZECH REPUBLIC	PI 428621	landrace seln	-	-	ADVANCED CULTIVAR
Kasticky	296	2	CZECH REPUBLIC	PI 428623	landrace seln	-	-	ADVANCED CULTIVAR
NAXON	297	2	GREECE	SWB 940	-	-	-	Unknown
NOLC DREGERUV BOHEMIA	298	2	CZECH REPUBLIC	PI 328808	-	-	-	ADVANCED CULTIVAR
OMK 34	299	2	HUNGARY	VDB 2082.1	-	-	-	Unknown
PI 95208	300	2	UKRAINE	CIho 6514	-	-	-	Unknown
Zborovicky Kargyn	301	2	CZECH REPUBLIC	PI 428635	selection from Han- X Kargyn	-	-	ADVANCED CULTIVAR
Radical	307	2	Russia	-	-	-	-	Breeding Line
PI 467618	309	1	FORMER SOVIET UNION	HOR 196	-	-	-	ADVANCED CULTIVAR
PI 467629	310	2	Russia	-	-	-	-	LANDRACE
PI 328020	312	2	Russia	-	-	-	-	LANDRACE
BROACH	313	2	RUSSIA	-	-	-	-
Mv.43	314	2	HUNGARY	PI 467795	MK 42 / Maris Concord	-	-	ADVANCED CULTIVAR
Jaspis	315	2	CZECH REPUBLIC	IG 38259	-	-	-	LANDRACE
Novodvorsky Hanacky	316	2	CZECH REPUBLIC	PI 428625	Starnovsky Kneifel / Ha- III	-	-	ADVANCED CULTIVAR
ORBIT	317	2	SLOVAKIA	PI 599632	-	-	-	ADVANCED CULTIVAR
PEREZTEGI	318	2	HUNGARY	CPI 20841	-	-	-	Unknown
PRODUCTIV	319	2	ROMANIA	-	-	-	-	Unknown
Kuban 02	320	1	RUSSIA	-	Radical/Pervenets//Radical	-	-	unknown
SHIROU	321	1	GREECE	SWB 1034	-	-	-	Unknown
ICB 101649	323	2	CZECH REPUBLIC	IG 18515	-	-	-	unknown
ICB 110617	324	2	CZECH REPUBLIC	IG 27483	-	-	-	unknown
ICB 119304	325	2	CZECH REPUBLIC	IG 36170	-	-	-	unknown
IG 16961	326	3	ARMENIA	-	-	-	-	LANDRACE
IG 16964	327	3	ARMENIA	-	-	-	-	LANDRACE
IG 16965	328	1	ARMENIA	-	-	-	-	LANDRACE
IG 16966	329	3	ARMENIA	-	-	-	-	LANDRACE
IG 19270	330	2	CZECH REPUBLIC	-	-	-	-	LANDRACE
IG 19378	331	2	HUNGARY	-	-	-	-	LANDRACE
IG 26251	333	3	ARMENIA	-	-	-	-	LANDRACE
IG 26252	334	1	ARMENIA	-	-	-	-	LANDRACE
IG 26382	335	3	Russia	-	-	-	-	LANDRACE
IG 26734	336	1	GEORGIA	-	-	-	-	LANDRACE
IG 26735	337	3	GEORGIA	-	-	-	-	LANDRACE
IG 26736	338	3	GEORGIA	-	-	-	-	LANDRACE
IG 26782	339	1	GEORGIA	-	-	-	-	LANDRACE
IG 26783	340	3	GEORGIA	-	-	-	-	LANDRACE
IG 27678	342	3	GEORGIA	-	-	-	-	LANDRACE
IG 28518	343	2	SLOVAKIA	-	-	-	-	LANDRACE
IG 36206	345	2	SLOVAKIA	-	-	-	-	LANDRACE
IG 36207	346	2	SLOVAKIA	-	-	-	-	LANDRACE
IG 36595	347	2	HUNGARY	-	-	-	-	LANDRACE
IG 112449	348	3	GEORGIA	-	-	-	-	LANDRACE
IG 112502	352	3	GEORGIA	-	-	-	-	LANDRACE
IG 125711	353	1	GEORGIA	-	-	-	-	LANDRACE
IG 125712	354	3	GEORGIA	-	-	-	-	LANDRACE
IG 125713	355	3	GEORGIA	-	-	-	-	LANDRACE
IG 125714	356	1	GEORGIA	-	-	-	-	LANDRACE
IG 125716	358	2	GEORGIA	-	-	-	-	LANDRACE
IG 125742	362	3	ARMENIA	-	-	-	-	LANDRACE
IG 125743	363	2	ARMENIA	-	-	-	-	LANDRACE
IG 125744	364	1	ARMENIA	-	-	-	-	LANDRACE
IG 125776	365	1	ARMENIA	-	-	-	-	LANDRACE
IG 125810	366	2	GREECE	-	-	-	-	LANDRACE
IG 125812	368	1	GREECE	-	-	-	-	LANDRACE
IG 125813	369	1	GREECE	-	-	-	-	LANDRACE
IG 125873	370	3	ARMENIA	-	-	-	-	LANDRACE
IG 125874	371	3	ARMENIA	-	-	-	-	LANDRACE
IG 125875	372	3	ARMENIA	-	-	-	-	LANDRACE
IG 125924	373	2	ROMANIA	-	-	-	-	LANDRACE
IG 129123	380	2	ARMENIA	-	-	-	-	LANDRACE
Profit	381	1	CZECH REPUBLIC	IG 38268	-	-	-	ADVANCED CULTIVAR
Nitransky Exportni	383	2	CZECH REPUBLIC	PI 428624	Selecty Kneifel / Radosinsky Exportni	-	-	ADVANCED CULTIVAR
GINTARINIAJ	385	2	LITHUANIA	PI 573608	-	-	-	ADVANCED CULTIVAR
HOR 9696	386	2	SLOVAKIA	-	-	-	-	LANDRACE
PATIMATIAE	388	1	FORMER SOVIET UNION	9/92	-	-	-	Unknown
Grammos	391	1	GREECE	BCC 1305	Mutant of Rivale	-	-	Mutation line
RUEN	392	1	BULGARIA	-	-	-	-	Unknown
Diamant	394	2	CZECH REPUBLIC	BCC 1379	Radiation mutant from Valticky	-	-	ADVANCED CULTIVAR
Hana	400	2	CZECH REPUBLIC	BCC 1432	seln from old LR Ha-	-	-	ADVANCED CULTIVAR
HOR 8676	401	2	CZECH REPUBLIC	BCC 1436	-	-	-	LANDRACE
Zhodinskij 5	407	2	BELARUS	BCC 1467	-	-	-	Unknown
Novum	408	3	SLOVAKIA	PI 599635	SK 1429 / Krystal	-	-	ADVANCED CULTIVAR
Auksinjai	409	2	LITHUANIA	BCC 1472	-	-	-	Unknown
Kniish 236	413	1	RUSSIA	BCC 1513	Meteor/Mutant 57 M13	-	-	Unknown
UERVONETZ	414	1	RUSSIA	CIho 6511	-	Sankt-Peterburg, Russian Federation	60.36666667, 28.60000000	Unknown
Akcent	417	2	CZECH REPUBLIC	BCC 1540	HVS-827/EP-79	-	-	ADVANCED CULTIVAR
Athenais	418	1	GREECE	BCC 1548	-	-	-	ADVANCED CULTIVAR
Ararati 7	419	1	ARMENIA	BCC 1551	Mutant of cultivar Kaler	-	-	Unknown
HOR 676	422	1	GREECE	BCC 1563	-	-	-	Unknown
HOR 753	423	2	GREECE	BCC 1566	-	-	-	Unknown
Magurele	424	2	ROMANIA	BCC 1574	-	-	-	ADVANCED CULTIVAR
Cluj 123	425	1	ROMANIA	BCC 1578	-	-	-	ADVANCED CULTIVAR
Miraj 1	428	1	ROMANIA	BCC 1585	-	-	-	Unknown
ALINGHI	429	1	CZECH REPUBLIC	-	-	-	-	ADVANCED CULTIVAR
IG 125732	431	3	ARMENIA	-	-	-	-	LANDRACE
Bohemian	433	2	CZECH REPUBLIC	CIho 32	-	-	-	LANDRACE
PERVENEC	434	1	UKRAINE	PI 573587	-	-	-	ADVANCED CULTIVAR
PI 94801	435	2	Russia	-	-	-	-	LANDRACE
Dobrovicky Starocesky	436	2	CZECH REPUBLIC	PI 129438	selection from Bohemian landvariety	-	-	ADVANCED CULTIVAR
Imperial	437	2	HUNGARY	IG 35706	-	-	-	LANDRACE
AMETYST	438	2	CZECH REPUBLIC	PI 428611	Domen // Valticky / Ha-cky Hubileni / Voldagsen // Diamant	-	-	ADVANCED CULTIVAR
RAGUSA B	439	2	FORMER YUGOSLAVIA	CIho 13126	-	Former Yugoslavia	-	ADVANCED CULTIVAR
Dvoran	440	2	SLOVAKIA	PI 428679	Hodoninsky Kvas / Slovensky Jemny	-	-	ADVANCED CULTIVAR
Jarek	443	2	CZECH REPUBLIC	IG 38258	-	-	-	ADVANCED CULTIVAR
Kredit	444	2	CZECH REPUBLIC	IG 38261	-	-	-	ADVANCED CULTIVAR
Galan	449	2	CZECH REPUBLIC	IG 38271	SK 2567/HE 1428	-	-	ADVANCED CULTIVAR
Atlas	450	2	CZECH REPUBLIC	IG 38274	-	-	-	ADVANCED CULTIVAR
ASSALA	454	1	GREECE	-	-	-	-	LANDRACE
KOMBAINIESIS	458	2	FORMER SOVIET UNION	OUU689	-	-	-	ADVANCED CULTIVAR
IG 18706	459	1	BULGARIA	-	-	-	-	LANDRACE
IG 18712	460	1	BULGARIA	-	-	-	-	LANDRACE
HOR 875	461	1	BULGARIA	BCC 1567	-	-	-	Unknown

## Sheet: Genotypic data
rs#	alleles	chrom	pos	strand	assembly#	center	protLSID	assayLSID	panelLSID	QCcode	EEB127	EEB99	EEB244	EEB245	EEB221	EEB198	EEB241	EEB217	EEB417	EEB103	EEB429	EEB438	EEB274	EEB419	EEB454	EEB418	EEB450	EEB409	EEB223	EEB195	EEB253	EEB10	EEB433	EEB11	EEB313	EEB153	EEB154	EEB16	EEB287	EEB268	EEB271	EEB18	EEB114	EEB129	EEB5	EEB425	EEB19	EEB194	EEB155
chr1H|HvGBSv2-2_427296+9	C/G	1	427305	+	NA	NA	NA	NA	NA	NA	C	C	C	C	C	C	C	C	C	C	C	C	C	C	C	C	C	C	C	C	C	C	C	C	C	C	C	C	C	C	C	C	C	C	C	C	C	C	C
chr1H|HvGBSv2-2_427296+24	G/C	1	427320	+	NA	NA	NA	NA	NA	NA	G	G	G	G	G	G	G	G	G	G	G	G	G	G	G	G	G	G	G	G	G	C	G	G	G	G	G	G	G	C	G	G	G	C	G	G	G	G	G
chr1H|HvGBSv2-2_427296+42	G/C	1	427338	+	NA	NA	NA	NA	NA	NA	G	G	G	C	G	G	G	C	G	G	G	G	G	C	G	G	G	G	G	G	G	G	G	G	C	G	G	G	G	G	G	G	G	G	G	G	G	C	G
chr1H|HvGBSv2-2_427296+45	C/T	1	427341	+	NA	NA	NA	NA	NA	NA	C	C	C	C	C	C	C	C	C	C	C	C	C	C	T	T	C	C	C	C	C	C	C	C	C	C	C	C	C	C	C	C	C	C	C	T	C	C	C
chr1H|HvGBSv2-2_427296+57	A/G	1	427353	+	NA	NA	NA	NA	NA	NA	A	G	G	A	A	G	G	A	A	G	G	A	G	A	A	A	A	A	A	A	G	A	G	A	A	G	G	A	G	A	A	A	A	A	A	A	A	A	A
chr1H|HvGBSv2-2_427296+62	C/T	1	427358	+	NA	NA	NA	NA	NA	NA	C	C	C	C	C	C	C	C	C	C	C	C	C	C	C	C	C	C	C	C	C	C	C	C	C	C	C	T	C	C	T	T	T	C	C	C	C	C	C
chr1H|HvGBSv2-2_427296+126	C/G	1	427422	+	NA	NA	NA	NA	NA	NA	C	C	C	C	C	C	C	C	C	C	C	C	C	C	C	C	C	C	C	C	C	G	C	C	C	C	C	C	C	G	C	C	C	G	C	C	C	C	C
chr1H|HvGBSv2-2_427296+160	T/C	1	427456	+	NA	NA	NA	NA	NA	NA	T	T	T	T	T	T	T	T	T	T	T	T	T	T	T	T	T	T	T	T	T	T	T	T	T	T	T	C	T	T	C	C	C	T	T	T	T	T	T
chr1H|HvGBSv2-2_427296+161	A/G	1	427457	+	NA	NA	NA	NA	NA	NA	A	A	A	A	A	A	A	A	A	A	A	A	A	A	A	A	A	A	A	A	A	A	A	A	A	A	A	A	A	A	A	A	A	A	A	A	A	A	A
chr1H|HvGBSv2-6090_1151352+39	A/C	1	1151391	+	NA	NA	NA	NA	NA	NA	A	A	A	A	M	A	A	A	A	A	A	A	A	A	A	A	A	A	M	M	A	A	A	A	A	A	A	A	A	A	A	A	A	A	A	A	A	A	A
chr1H|HvGBSv2-6090_1151352+57	T/G	1	1151409	+	NA	NA	NA	NA	NA	NA	T	T	G	G	T	T	T	G	T	T	T	T	T	T	T	T	T	T	T	T	G	T	G	T	G	T	T	G	T	T	G	G	G	T	T	T	T	G	T
chr1H|HvGBSv2-6090_1151352+78	C/G	1	1151430	+	NA	NA	NA	NA	NA	NA	C	C	C	C	S	C	C	C	C	C	C	C	C	C	C	C	C	C	S	S	C	C	C	C	C	C	C	C	C	S	C	C	C	C	C	C	C	C	C
chr1H|HvGBSv2-6090_1151352+85	G/A	1	1151437	+	NA	NA	NA	NA	NA	NA	G	G	G	G	R	G	G	G	G	G	G	G	G	G	G	G	G	G	R	R	G	G	G	G	G	G	G	G	G	G	G	G	G	G	G	G	G	G	G
chr1H|HvGBSv2-6090_1151352+100	A/G	1	1151452	+	NA	NA	NA	NA	NA	NA	A	A	A	A	A	A	A	A	G	A	A	A	A	A	A	A	A	A	A	A	A	A	A	G	A	A	A	A	A	A	A	A	A	A	A	A	A	A	A
chr1H|HvGBSv2-6090_1151352+153	T/A	1	1151505	+	NA	NA	NA	NA	NA	NA	T	T	T	T	T	T	T	T	A	T	T	T	T	T	T	T	T	T	T	T	T	T	T	A	T	T	T	T	T	T	T	T	T	T	T	T	T	T	T
chr1H|HvGBSv2-6090_1151352+171	A/G	1	1151523	+	NA	NA	NA	NA	NA	NA	A	A	G	G	A	A	A	G	A	A	A	A	A	A	A	A	A	A	A	A	G	A	G	A	G	A	A	G	A	A	G	G	G	A	A	A	A	G	A
chr1H|HvGBSv2-4_1311488+30	C/G	1	1311518	+	NA	NA	NA	NA	NA	NA	C	C	C	C	C	C	C	C	C	C	C	C	G	C	C	C	C	C	C	C	C	C	C	C	C	C	C	C	C	C	C	C	C	C	C	C	C	C	G
chr1H|HvGBSv2-4_1311488+35	G/A	1	1311523	+	NA	NA	NA	NA	NA	NA	G	G	G	G	G	G	G	G	A	G	G	G	G	G	G	G	A	G	G	G	G	G	G	A	G	G	G	G	G	G	G	G	G	G	G	G	G	G	G
chr1H|HvGBSv2-4_1311488+59	T/C	1	1311547	+	NA	NA	NA	NA	NA	NA	T	T	T	T	T	T	T	T	T	T	T	T	T	T	T	T	T	T	T	T	T	T	T	T	T	T	T	T	T	Y	T	T	T	T	T	T	T	T	T
chr1H|HvGBSv2-4_1311488+65	T/C	1	1311553	+	NA	NA	NA	NA	NA	NA	T	T	T	T	T	T	T	T	T	T	T	T	C	T	T	T	T	T	T	T	T	Y	T	T	T	T	T	T	T	T	T	T	T	C	T	T	T	T	C
chr1H|HvGBSv2-4_1311488+66	T/G	1	1311554	+	NA	NA	NA	NA	NA	NA	T	T	T	T	T	T	T	T	T	T	T	T	T	T	T	T	T	T	T	T	T	T	T	T	T	T	T	G	T	T	G	T	T	T	T	T	T	T	T
chr1H|HvGBSv2-4_1311488+180	A/G	1	1311668	+	NA	NA	NA	NA	NA	NA	A	A	A	A	A	A	A	A	G	A	A	A	A	A	A	A	G	A	A	A	A	A	A	G	A	A	A	A	A	A	A	A	A	A	A	A	A	A	A
chr1H|HvGBSv2-4_1341012+33	A/G	1	1341045	+	NA	NA	NA	NA	NA	NA	A	A	A	A	A	A	A	A	A	A	A	A	A	A	A	A	A	A	A	A	A	A	A	A	A	A	A	A	A	G	A	A	A	A	A	A	A	A	A
chr1H|HvGBSv2-4_1341012+118	T/C	1	1341130	+	NA	NA	NA	NA	NA	NA	T	T	C	C	C	C	T	C	T	T	T	T	T	T	T	T	T	T	T	T	T	T	T	T	C	T	T	T	T	T	T	T	T	T	T	T	T	C	T
chr1H|HvGBSv2-6092_2019789+7	A/G	1	2019796	+	NA	NA	NA	NA	NA	NA	A	A	A	A	A	A	A	A	A	A	G	A	A	A	A	A	A	A	A	A	A	A	A	A	A	A	A	A	A	A	A	A	A	A	A	A	A	A	A
chr1H|HvGBSv2-6092_2019789+20	T/C	1	2019809	+	NA	NA	NA	NA	NA	NA	T	T	T	T	T	T	T	T	T	T	T	T	T	T	T	T	T	T	T	T	T	T	T	T	T	T	T	T	T	T	T	C	C	T	T	T	T	T	T
chr1H|HvGBSv2-6092_2019789+22	T/C	1	2019811	+	NA	NA	NA	NA	NA	NA	T	T	T	T	C	T	T	T	T	T	T	C	T	T	T	T	T	T	C	T	T	T	T	T	T	T	T	C	T	T	T	C	C	T	T	T	T	T	T
chr1H|HvGBSv2-6092_2019789+25	A/G	1	2019814	+	NA	NA	NA	NA	NA	NA	A	A	A	A	A	A	A	A	A	A	G	A	A	A	A	A	A	A	A	A	A	A	A	A	A	A	A	A	A	A	A	A	A	A	A	A	A	A	A
chr1H|HvGBSv2-6092_2019789+66	G/T	1	2019855	+	NA	NA	NA	NA	NA	NA	T	T	G	G	G	T	G	G	G	G	G	G	G	T	G	G	G	T	G	T	T	G	T	G	G	T	T	G	G	G	G	G	G	G	G	G	G	G	G
chr1H|HvGBSv2-6092_2019789+84	T/C	1	2019873	+	NA	NA	NA	NA	NA	NA	T	T	T	T	T	T	T	C	T	T	T	T	C	T	T	C	T	T	T	T	T	T	T	T	C	T	T	T	C	T	T	T	T	T	C	T	T	C	T
chr1H|HvGBSv2-6092_2019789+161	C/T	1	2019950	+	NA	NA	NA	NA	NA	NA	C	C	C	C	C	C	C	C	C	C	C	C	C	C	C	C	C	C	C	C	C	C	C	C	C	C	C	C	C	C	C	C	C	C	C	C	T	C	C
chr1H|HvGBSv2-6092_2019789+176	T/C	1	2019965	+	NA	NA	NA	NA	NA	NA	T	T	T	T	T	T	T	C	T	T	T	T	C	T	T	C	T	T	T	T	T	T	T	T	C	T	T	T	C	T	T	T	T	T	C	T	T	C	T
chr1H|HvGBSv2-6094_2925919+35	G/C	1	2925954	+	NA	NA	NA	NA	NA	NA	G	G	G	G	G	G	G	G	G	G	G	C	G	G	G	G	G	C	G	C	G	G	G	G	G	G	G	G	G	G	C	C	C	G	G	G	G	G	C
chr1H|HvGBSv2-6094_2925919+71	T/C	1	2925990	+	NA	NA	NA	NA	NA	NA	C	T	T	T	T	T	T	T	T	C	T	T	T	C	C	T	C	T	T	T	T	T	T	T	C	T	T	T	C	C	T	T	T	T	C	T	T	T	C
chr1H|HvGBSv2-6094_2925919+93	G/A	1	2926012	+	NA	NA	NA	NA	NA	NA	A	G	G	G	G	G	G	G	G	A	G	G	G	A	A	G	A	G	G	G	G	G	G	G	A	G	G	G	A	A	G	G	G	G	A	G	G	G	A
chr1H|HvGBSv2-6094_2925919+113	C/G	1	2926032	+	NA	NA	NA	NA	NA	NA	G	C	C	C	C	C	C	C	C	G	C	C	C	G	G	C	G	C	C	C	C	C	C	C	G	C	C	C	G	G	C	C	C	C	G	C	C	C	G
chr1H|HvGBSv2-6094_2925919+168	A/C	1	2926087	+	NA	NA	NA	NA	NA	NA	A	A	A	A	A	A	A	A	A	A	A	A	A	A	A	A	A	A	A	A	A	A	A	A	A	A	A	A	A	A	A	A	A	A	A	A	A	A	A
chr1H|HvGBSv2-8_3186613+9	G/C	1	3186622	+	NA	NA	NA	NA	NA	NA	G	G	G	G	G	G	C	G	G	C	C	G	G	C	G	G	G	G	G	G	G	G	G	G	G	G	G	G	G	G	G	G	G	G	G	G	G	G	G
chr1H|HvGBSv2-8_3186613+13	T/A	1	3186626	+	NA	NA	NA	NA	NA	NA	T	T	T	T	T	T	T	T	T	T	T	T	W	T	T	W	T	T	T	T	T	T	T	T	T	T	T	T	T	T	T	T	T	T	T	T	T	T	T
chr1H|HvGBSv2-8_3186613+15	C/T	1	3186628	+	NA	NA	NA	NA	NA	NA	C	C	C	C	C	C	T	C	C	T	T	C	C	T	C	C	C	C	C	C	C	C	C	C	C	C	C	C	C	C	C	C	C	C	C	C	C	C	C
chr1H|HvGBSv2-8_3186613+37	A/C	1	3186650	+	NA	NA	NA	NA	NA	NA	A	A	A	A	A	A	C	A	A	C	C	A	A	C	A	A	A	A	A	A	A	A	A	A	A	A	A	A	A	A	A	A	A	A	A	A	A	A	A
chr1H|HvGBSv2-8_3186613+61	A/G	1	3186674	+	NA	NA	NA	NA	NA	NA	A	A	A	A	A	A	A	A	A	A	A	A	R	A	A	R	A	A	A	A	A	A	A	A	A	A	A	A	A	A	A	A	A	A	A	A	A	A	A
chr1H|HvGBSv2-8_3186613+63	G/C	1	3186676	+	NA	NA	NA	NA	NA	NA	G	G	G	G	G	G	G	G	G	G	G	G	G	G	G	G	G	G	G	G	G	G	G	G	G	G	G	G	G	G	G	G	G	G	G	G	G	G	G
chr1H|HvGBSv2-8_3186613+83	C/T	1	3186696	+	NA	NA	NA	NA	NA	NA	C	T	T	C	C	T	C	C	C	Y	C	C	C	C	C	C	C	C	C	T	C	C	C	C	C	T	T	C	C	C	C	C	C	C	C	C	C	C	T
chr1H|HvGBSv2-8_3186613+133	G/A	1	3186746	+	NA	NA	NA	NA	NA	NA	G	G	G	A	G	G	G	G	G	G	G	G	G	G	G	G	G	G	G	G	G	G	G	G	G	G	G	G	G	G	G	A	A	A	G	G	G	G	G
chr1H|HvGBSv2-8_3186613+160	T/C	1	3186773	+	NA	NA	NA	NA	NA	NA	T	T	T	T	T	T	T	T	T	T	T	T	T	T	T	T	T	T	T	T	T	T	T	T	T	T	T	T	T	T	T	C	C	T	T	T	T	T	T
chr1H|HvGBSv2-8_3186613+169	A/G	1	3186782	+	NA	NA	NA	NA	NA	NA	A	A	A	A	A	A	A	A	A	A	G	A	A	G	A	R	A	A	A	A	A	A	A	A	A	A	A	A	A	A	A	A	A	A	A	A	A	A	A
chr1H|HvGBSv2-6095_3201669+16	A/T	1	3201685	+	NA	NA	NA	NA	NA	NA	A	A	A	A	A	A	A	A	A	A	A	A	A	A	A	A	A	A	A	A	A	A	A	A	A	A	A	A	A	A	A	A	T	A	A	A	A	A	A
chr1H|HvGBSv2-6095_3201669+25	G/C	1	3201694	+	NA	NA	NA	NA	NA	NA	C	G	G	G	C	G	G	C	C	G	G	G	C	G	C	G	C	G	C	G	G	G	G	G	C	G	G	G	C	C	G	G	G	G	C	G	G	G	G
chr1H|HvGBSv2-6095_3201669+118	G/A	1	3201787	+	NA	NA	NA	NA	NA	NA	G	G	G	G	G	G	G	G	G	G	G	G	G	G	G	G	G	G	G	G	G	G	G	G	G	G	G	G	G	G	G	G	A	G	G	G	G	G	G
chr1H|HvGBSv2-6097_4271117+26	T/G	1	4271143	+	NA	NA	NA	NA	NA	NA	T	T	T	T	T	G	K	G	T	T	T	T	T	T	T	T	T	T	T	T	G	T	T	T	T	G	G	T	T	G	T	T	T	T	G	T	T	T	T
chr1H|HvGBSv2-6097_4271117+33	A/G	1	4271150	+	NA	NA	NA	NA	NA	NA	A	A	A	A	A	G	R	A	A	A	A	A	A	A	A	A	A	A	A	A	A	A	A	A	A	A	A	A	A	A	A	A	A	A	A	A	A	A	A
chr1H|HvGBSv2-6097_4271117+39	T/C	1	4271156	+	NA	NA	NA	NA	NA	NA	T	T	T	T	T	C	Y	T	T	T	T	T	T	T	T	T	T	T	T	T	T	T	T	T	T	T	T	T	T	T	T	T	T	T	T	T	T	T	T
chr1H|HvGBSv2-6097_4271117+48	T/C	1	4271165	+	NA	NA	NA	NA	NA	NA	T	T	T	T	T	T	T	T	T	T	T	T	T	T	T	T	T	T	T	T	T	T	T	T	T	T	T	T	C	T	T	T	T	T	T	T	T	T	T
chr1H|HvGBSv2-6097_4271117+66	T/C	1	4271183	+	NA	NA	NA	NA	NA	NA	Y	T	C	T	T	T	T	T	T	T	Y	T	C	T	C	C	T	T	T	T	T	T	T	T	T	T	T	C	T	T	T	T	T	C	T	T	T	T	C
chr1H|HvGBSv2-6097_4271117+69	T/C	1	4271186	+	NA	NA	NA	NA	NA	NA	T	T	C	T	T	T	T	T	T	T	T	T	C	T	T	T	T	T	T	T	T	T	T	T	T	T	T	C	T	T	T	T	T	C	T	T	T	T	T
chr1H|HvGBSv2-6097_4271117+79	T/C	1	4271196	+	NA	NA	NA	NA	NA	NA	T	T	T	T	T	T	T	T	T	T	Y	T	T	T	T	T	T	T	T	T	T	T	T	T	T	T	T	T	T	T	T	C	C	T	T	T	T	T	T
chr1H|HvGBSv2-6097_4271117+106	A/G	1	4271223	+	NA	NA	NA	NA	NA	NA	A	A	A	A	A	A	A	A	A	A	A	A	A	A	A	A	A	A	A	A	A	A	A	A	A	A	A	A	G	A	A	A	A	A	A	A	A	A	A
chr1H|HvGBSv2-6097_4271117+110	G/T	1	4271227	+	NA	NA	NA	NA	NA	NA	G	G	G	G	G	T	K	G	G	G	G	G	G	G	G	G	G	G	G	G	G	G	G	G	G	G	G	G	G	G	G	G	G	G	G	G	G	G	G
chr1H|HvGBSv2-6097_4271117+116	A/G	1	4271233	+	NA	NA	NA	NA	NA	NA	A	A	G	A	A	A	A	A	A	A	G	A	G	A	A	A	A	A	A	A	A	A	A	A	A	A	A	G	G	A	A	G	G	G	A	A	A	A	A
chr1H|HvGBSv2-3633_4275096+35	G/T	1	4275131	+	NA	NA	NA	NA	NA	NA	G	G	G	G	G	G	G	G	G	G	G	G	G	G	G	G	G	G	G	G	G	G	G	G	G	G	G	G	G	G	G	G	G	G	G	T	G	G	G
chr1H|HvGBSv2-3633_4275096+72	T/G	1	4275168	+	NA	NA	NA	NA	NA	NA	T	T	T	T	T	T	T	T	T	T	T	T	T	T	T	T	T	T	T	T	T	T	T	T	T	T	T	T	T	T	T	T	T	T	T	T	T	T	T
chr1H|HvGBSv2-3633_4275096+78	G/A	1	4275174	+	NA	NA	NA	NA	NA	NA	G	G	A	G	G	G	G	G	G	G	G	G	G	G	G	G	G	G	G	G	G	G	G	G	G	G	G	A	G	G	G	G	G	A	G	G	G	G	G
chr1H|HvGBSv2-3633_4275096+163	A/C	1	4275259	+	NA	NA	NA	NA	NA	NA	C	C	A	C	C	A	C	A	A	C	A	A	C	A	C	C	A	A	C	A	A	C	A	A	A	A	A	A	C	A	A	A	A	A	C	C	C	C	A
chr1H|HvGBSv2-6098_4653881+26	C/A	1	4653907	+	NA	NA	NA	NA	NA	NA	C	A	A	C	A	C	C	A	C	C	C	C	C	A	C	C	C	A	C	C	A	A	A	C	A	C	C	C	A	A	C	C	C	A	A	C	C	C	C
chr1H|HvGBSv2-6098_4653881+30	T/C	1	4653911	+	NA	NA	NA	NA	NA	NA	T	C	C	T	C	T	T	C	T	T	T	T	T	C	T	T	T	C	T	T	C	C	C	T	C	T	T	T	C	C	T	T	T	C	C	T	T	T	T
chr1H|HvGBSv2-6098_4653881+40	T/C	1	4653921	+	NA	NA	NA	NA	NA	NA	T	C	C	T	C	T	T	C	T	T	T	T	T	C	T	T	T	C	T	T	C	C	C	T	C	T	T	T	C	C	T	T	T	C	C	T	T	T	T
chr1H|HvGBSv2-6098_4653881+67	G/A	1	4653948	+	NA	NA	NA	NA	NA	NA	A	G	G	A	G	G	A	G	G	A	G	G	G	G	A	G	G	G	G	G	G	G	G	G	G	G	G	G	G	G	G	G	G	G	G	G	G	G	G
chr1H|HvGBSv2-6098_4653881+82	T/C	1	4653963	+	NA	NA	NA	NA	NA	NA	T	C	C	T	C	T	T	C	T	T	T	T	T	C	T	T	T	C	T	T	C	C	C	T	C	T	T	T	C	C	T	T	T	C	C	T	T	T	T
chr1H|HvGBSv2-6098_4653881+102	C/T	1	4653983	+	NA	NA	NA	NA	NA	NA	C	T	T	C	T	C	C	T	C	C	C	C	C	T	C	C	C	T	C	C	T	T	T	C	T	C	C	C	T	T	C	C	C	T	T	C	C	C	C
chr1H|HvGBSv2-6099_5594432+24	C/T	1	5594456	+	NA	NA	NA	NA	NA	NA	C	C	T	C	C	C	C	C	C	C	C	C	C	C	C	C	C	C	C	T	C	C	C	C	C	C	C	C	C	C	C	C	C	T	C	C	C	C	C
chr1H|HvGBSv2-6099_5594432+58	C/T	1	5594490	+	NA	NA	NA	NA	NA	NA	C	C	C	C	T	C	C	C	C	C	C	C	C	C	C	C	C	C	T	C	C	C	C	C	C	C	C	C	C	C	C	C	C	C	C	C	C	T	C
chr1H|HvGBSv2-13_5765959+8	A/C	1	5765967	+	NA	NA	NA	NA	NA	NA	A	A	A	A	A	A	A	A	C	A	A	A	A	A	A	A	A	A	A	A	A	A	A	C	A	A	A	A	C	A	A	A	A	A	C	A	A	A	A
chr1H|HvGBSv2-13_5765959+24	T/C	1	5765983	+	NA	NA	NA	NA	NA	NA	T	T	T	T	T	T	T	T	T	T	T	C	T	T	T	T	T	C	T	T	T	T	T	T	T	T	T	T	T	T	T	T	T	T	T	T	T	Y	T
chr1H|HvGBSv2-13_5765959+25	A/G	1	5765984	+	NA	NA	NA	NA	NA	NA	A	A	A	A	A	A	A	G	A	A	A	A	G	A	A	A	A	A	A	A	A	A	G	A	G	A	A	A	A	G	A	G	G	G	A	A	A	A	A
chr1H|HvGBSv2-13_5765959+51	G/A	1	5766010	+	NA	NA	NA	NA	NA	NA	G	G	G	A	G	G	G	G	G	G	G	G	G	G	G	G	G	G	G	A	G	G	G	G	G	G	G	G	G	G	G	G	G	G	G	G	A	G	G
chr1H|HvGBSv2-13_5765959+75	A/G	1	5766034	+	NA	NA	NA	NA	NA	NA	A	A	A	A	A	A	A	A	A	A	A	A	A	A	A	A	A	A	A	A	A	A	G	A	A	A	A	A	A	G	G	A	A	A	A	A	A	A	G
chr1H|HvGBSv2-13_5765959+120	T/C	1	5766079	+	NA	NA	NA	NA	NA	NA	T	T	T	T	T	T	T	T	T	T	T	T	T	T	T	T	T	T	T	T	C	T	T	T	T	T	T	T	T	T	T	T	T	T	T	T	T	Y	T
chr1H|HvGBSv2-13_5765959+128	G/C	1	5766087	+	NA	NA	NA	NA	NA	NA	C	G	G	G	G	G	G	G	G	G	G	G	G	G	C	G	G	G	G	G	G	G	G	G	G	G	G	G	G	G	G	G	G	G	G	G	G	G	G
chr1H|HvGBSv2-13_5765959+150	G/A	1	5766109	+	NA	NA	NA	NA	NA	NA	G	G	G	G	A	G	G	A	G	G	G	G	G	G	G	G	G	G	A	A	G	G	G	G	A	G	G	G	G	G	G	A	A	G	G	G	G	G	G
chr1H|HvGBSv2-6101_6977461+62	T/C	1	6977523	+	NA	NA	NA	NA	NA	NA	T	C	T	T	T	T	T	T	C	T	C	C	T	C	T	Y	C	C	T	T	T	T	C	C	T	T	T	T	T	C	T	C	C	C	T	C	T	T	T
chr1H|HvGBSv2-6101_6977461+95	A/G	1	6977556	+	NA	NA	NA	NA	NA	NA	A	A	G	A	G	A	G	G	A	G	A	A	A	A	A	A	A	A	G	A	G	G	A	A	G	G	G	A	G	A	A	A	A	A	G	A	G	G	G
chr1H|HvGBSv2-6102_7425774+70	C/T	1	7425844	+	NA	NA	NA	NA	NA	NA	C	T	C	C	C	T	C	T	T	C	T	C	C	T	C	C	T	T	C	C	T	C	C	T	T	T	T	C	T	C	C	C	T	C	T	T	C	C	T
chr1H|HvGBSv2-6102_7425774+79	A/G	1	7425853	+	NA	NA	NA	NA	NA	NA	A	G	A	A	A	G	A	G	G	A	G	A	A	G	A	A	G	G	A	A	G	A	A	G	G	G	G	A	G	A	A	A	G	A	G	G	A	A	G
chr1H|HvGBSv2-6102_7425774+125	A/C	1	7425899	+	NA	NA	NA	NA	NA	NA	C	A	A	A	A	A	A	A	A	A	C	A	A	A	C	C	A	A	A	A	A	A	A	A	A	A	A	A	A	A	C	A	A	A	A	A	A	A	A
chr1H|HvGBSv2-6102_7425774+137	A/T	1	7425911	+	NA	NA	NA	NA	NA	NA	A	T	A	A	A	T	A	T	T	A	T	A	A	T	A	A	T	T	A	A	T	A	A	T	T	T	T	A	T	A	A	A	T	A	T	T	A	A	T
chr1H|HvGBSv2-17_7656241+19	G/T	1	7656260	+	NA	NA	NA	NA	NA	NA	T	G	T	T	G	G	G	G	G	G	G	G	T	G	T	G	G	G	G	G	G	G	G	G	G	G	G	T	G	G	G	G	G	T	G	G	T	T	T
chr1H|HvGBSv2-17_7656241+113	A/C	1	7656354	+	NA	NA	NA	NA	NA	NA	A	A	C	C	A	A	A	A	A	A	A	A	C	A	C	A	A	A	A	A	A	A	A	A	A	A	A	A	A	A	A	A	A	C	A	A	C	C	A
chr1H|HvGBSv2-6104_8336502+9	A/T	1	8336511	+	NA	NA	NA	NA	NA	NA	T	T	T	T	T	T	T	A	A	T	T	A	T	T	T	T	A	A	T	T	T	T	A	A	A	T	T	T	A	A	T	A	A	A	T	T	A	T	T
chr1H|HvGBSv2-6104_8336502+118	G/A	1	8336620	+	NA	NA	NA	NA	NA	NA	G	G	G	G	G	G	G	G	G	G	G	A	G	G	G	G	G	G	G	G	G	G	A	G	A	G	G	G	G	A	G	A	A	G	G	G	G	G	G
chr1H|HvGBSv2-6104_8336502+123	T/C	1	8336625	+	NA	NA	NA	NA	NA	NA	C	C	C	C	C	C	C	T	T	C	C	T	C	C	C	C	T	T	C	C	C	C	T	T	T	C	C	C	T	T	C	T	T	T	C	C	T	C	C
chr1H|HvGBSv2-6108_10141550+37	T/C	1	10141587	+	NA	NA	NA	NA	NA	NA	T	T	C	T	C	T	T	T	T	T	T	T	T	T	T	T	T	T	T	T	T	C	T	C	T	T	T	T	T	T	T	T	T	T	T	T	C	T	T
chr1H|HvGBSv2-6108_10141550+48	T/C	1	10141598	+	NA	NA	NA	NA	NA	NA	T	T	C	T	C	T	T	T	T	T	T	T	T	T	T	T	T	T	T	T	T	C	T	C	T	T	T	T	T	T	T	C	C	T	T	T	C	C	T
chr1H|HvGBSv2-6108_10141550+57	C/T	1	10141607	+	NA	NA	NA	NA	NA	NA	T	C	C	C	C	C	C	C	C	C	C	C	C	C	C	C	C	C	C	C	C	C	C	C	C	C	T	C	C	C	C	T	T	C	C	C	C	C	T
chr1H|HvGBSv2-6108_10141550+60	G/T	1	10141610	+	NA	NA	NA	NA	NA	NA	G	G	T	G	T	G	G	G	G	G	G	G	G	G	G	G	G	G	G	G	G	T	G	T	G	G	G	G	G	G	G	G	G	G	G	G	T	G	G
chr1H|HvGBSv2-6108_10141550+86	T/C	1	10141636	+	NA	NA	NA	NA	NA	NA	T	T	T	T	T	T	T	T	T	T	T	C	T	T	T	T	T	C	T	T	T	T	T	T	T	T	T	T	T	T	T	T	T	T	T	T	T	T	T
chr1H|HvGBSv2-6108_10141550+93	T/C	1	10141643	+	NA	NA	NA	NA	NA	NA	T	T	T	T	T	T	T	T	T	T	T	C	T	T	T	T	T	C	T	T	T	T	T	T	T	T	T	T	T	T	T	T	T	T	T	T	T	T	T
chr1H|HvGBSv2-6109_10601655+6	T/C	1	10601661	+	NA	NA	NA	NA	NA	NA	T	C	T	T	T	T	T	T	T	T	T	T	T	C	T	T	T	T	T	T	T	T	C	C	C	C	T	T	T	T	T	C	C	T	T	T	T	T	T
chr1H|HvGBSv2-6109_10601655+18	T/A	1	10601673	+	NA	NA	NA	NA	NA	NA	T	A	T	T	T	T	T	T	T	T	T	T	T	A	T	T	T	T	T	T	T	T	A	A	A	A	T	T	T	T	T	A	A	T	T	T	T	T	T
chr1H|HvGBSv2-6109_10601655+19	C/T	1	10601674	+	NA	NA	NA	NA	NA	NA	C	T	C	C	C	C	C	C	C	C	C	C	C	T	C	C	C	C	C	C	C	C	T	T	T	T	C	C	C	C	C	T	T	C	C	C	C	C	C
chr1H|HvGBSv2-6109_10601655+47	G/A	1	10601702	+	NA	NA	NA	NA	NA	NA	G	A	G	G	G	G	G	G	G	G	G	G	G	A	G	G	G	G	G	G	G	G	A	A	A	A	G	G	G	G	G	A	A	G	G	G	G	G	G
chr1H|HvGBSv2-6109_10601655+52	A/G	1	10601707	+	NA	NA	NA	NA	NA	NA	A	G	A	A	A	A	A	A	A	A	A	A	A	G	A	A	A	A	A	A	A	A	G	G	G	G	A	A	A	A	A	G	G	A	A	A	A	A	A
chr1H|HvGBSv2-6109_10601655+61	T/C	1	10601716	+	NA	NA	NA	NA	NA	NA	T	C	T	T	T	T	T	T	T	T	T	T	T	C	T	T	T	T	T	T	T	T	C	C	C	C	T	T	T	T	T	C	C	T	T	T	T	T	T
chr1H|HvGBSv2-6109_10601655+79	C/A	1	10601734	+	NA	NA	NA	NA	NA	NA	C	A	C	C	C	C	C	C	C	C	C	C	C	A	C	C	C	C	C	C	C	C	A	A	A	A	C	C	C	C	C	A	A	C	C	C	C	C	C
chr1H|HvGBSv2-6109_10601655+89	C/T	1	10601744	+	NA	NA	NA	NA	NA	NA	C	T	C	C	C	C	C	C	C	C	C	C	C	T	C	C	C	C	C	C	C	C	T	T	T	T	C	C	C	C	C	T	T	C	C	C	C	C	C
chr1H|HvGBSv2-6109_10601655+115	A/G	1	10601770	+	NA	NA	NA	NA	NA	NA	A	G	A	A	A	A	A	A	A	A	A	A	A	G	A	A	A	A	A	A	A	A	G	G	G	G	A	A	A	A	A	G	G	A	A	A	A	A	A
chr1H|HvGBSv2-24_10794502+19	G/C	1	10794521	+	NA	NA	NA	NA	NA	NA	G	G	G	G	G	G	G	G	G	G	G	S	G	G	G	G	G	C	G	G	G	G	G	G	G	G	G	G	G	G	G	G	G	G	G	G	G	G	G
chr1H|HvGBSv2-24_10794502+22	A/G	1	10794524	+	NA	NA	NA	NA	NA	NA	A	A	A	A	A	A	A	A	A	A	A	R	A	A	A	A	A	G	A	A	A	A	A	A	A	A	A	A	A	A	A	A	A	A	A	A	A	A	A
chr1H|HvGBSv2-24_10794502+24	T/C	1	10794526	+	NA	NA	NA	NA	NA	NA	T	T	C	C	C	T	T	T	T	T	T	T	T	T	T	T	T	T	C	C	T	T	T	T	T	T	T	T	T	T	T	T	T	T	T	C	T	T	T
chr1H|HvGBSv2-24_10794502+30	C/G	1	10794532	+	NA	NA	NA	NA	NA	NA	C	C	C	C	C	C	C	C	C	C	C	S	C	C	C	C	C	G	C	C	C	C	C	C	C	C	C	C	C	C	C	C	C	C	C	C	C	C	C
chr1H|HvGBSv2-24_10794502+32	A/G	1	10794534	+	NA	NA	NA	NA	NA	NA	A	A	A	A	A	A	A	A	A	A	A	R	A	A	A	A	A	G	A	A	A	A	A	A	A	A	A	A	A	A	A	A	A	A	A	A	A	A	A
chr1H|HvGBSv2-24_10794502+34	G/C	1	10794536	+	NA	NA	NA	NA	NA	NA	G	G	C	C	C	G	G	G	G	G	G	G	G	G	G	G	G	G	C	C	G	G	G	C	G	G	G	C	G	C	G	G	G	S	G	C	G	C	G
chr1H|HvGBSv2-24_10794502+37	T/G	1	10794539	+	NA	NA	NA	NA	NA	NA	T	T	G	G	G	T	T	T	T	T	T	T	T	T	T	T	T	T	G	G	T	T	T	G	T	T	T	G	T	G	T	T	T	K	T	G	T	G	T
chr1H|HvGBSv2-24_10794502+56	T/C	1	10794558	+	NA	NA	NA	NA	NA	NA	T	T	T	T	T	T	T	T	T	T	T	Y	T	T	T	T	T	C	T	T	T	T	T	T	T	T	T	T	T	T	T	T	T	T	T	T	T	T	T
chr1H|HvGBSv2-24_10794502+57	A/G	1	10794559	+	NA	NA	NA	NA	NA	NA	A	A	A	A	A	A	A	G	A	A	A	A	A	A	A	A	A	A	A	A	A	A	A	A	A	A	A	A	A	A	A	G	G	A	A	A	A	A	A
chr1H|HvGBSv2-24_10794502+87	C/G	1	10794589	+	NA	NA	NA	NA	NA	NA	C	C	C	C	C	C	C	C	C	C	C	S	C	C	C	C	C	G	C	C	C	C	C	C	C	C	C	C	C	C	C	C	C	C	C	C	C	C	C
chr1H|HvGBSv2-24_10794502+91	C/G	1	10794593	+	NA	NA	NA	NA	NA	NA	C	C	C	C	C	C	C	C	C	C	C	S	C	C	C	C	C	G	C	C	C	C	C	C	C	C	C	C	C	C	C	C	C	C	C	C	C	C	C
chr1H|HvGBSv2-24_10794502+109	C/A	1	10794611	+	NA	NA	NA	NA	NA	NA	C	C	C	C	C	C	C	C	A	C	C	M	C	C	C	A	A	A	C	C	C	A	C	C	C	C	C	C	C	C	C	C	C	M	A	C	C	C	C
chr1H|HvGBSv2-24_10794502+113	G/A	1	10794615	+	NA	NA	NA	NA	NA	NA	G	G	G	G	G	G	G	G	G	G	G	R	G	G	G	G	G	A	G	G	G	G	G	G	G	G	G	G	G	G	G	G	G	G	G	G	G	G	G
chr1H|HvGBSv2-24_10794502+126	A/G	1	10794628	+	NA	NA	NA	NA	NA	NA	A	A	A	A	A	A	A	A	A	A	A	A	A	A	A	A	A	A	A	A	A	A	A	A	A	A	A	A	A	A	A	A	A	A	A	A	A	A	A
chr1H|HvGBSv2-24_10794502+132	A/G	1	10794634	+	NA	NA	NA	NA	NA	NA	A	A	A	A	A	A	A	A	A	A	A	R	A	A	A	A	A	G	A	A	A	A	A	A	A	A	A	A	A	A	A	A	A	A	A	A	A	A	A
chr1H|HvGBSv2-24_10794502+136	A/G	1	10794638	+	NA	NA	NA	NA	NA	NA	A	A	A	A	A	A	A	A	A	A	A	R	A	A	A	A	A	G	A	A	A	A	A	A	A	A	A	A	A	A	A	A	A	A	A	A	A	A	A
chr1H|HvGBSv2-24_10794502+147	C/T	1	10794649	+	NA	NA	NA	NA	NA	NA	C	C	C	C	C	C	C	C	C	C	C	C	C	C	C	C	C	C	C	C	C	T	C	C	C	C	C	C	C	C	C	C	C	Y	T	C	C	C	C
chr1H|HvGBSv2-24_10794502+164	A/G	1	10794666	+	NA	NA	NA	NA	NA	NA	A	A	A	A	A	G	G	G	G	A	A	R	A	A	A	A	A	A	A	A	A	A	A	A	G	A	A	A	A	A	A	G	G	A	A	A	G	A	A
chr1H|HvGBSv2-24_10794502+165	C/T	1	10794667	+	NA	NA	NA	NA	NA	NA	C	C	C	C	C	T	T	T	T	C	C	Y	C	C	C	C	C	C	C	C	C	C	C	C	T	C	C	C	C	C	C	T	T	C	C	C	T	C	C
chr1H|HvGBSv2-6110_10967260+5	A/G	1	10967265	+	NA	NA	NA	NA	NA	NA	A	A	A	A	A	A	A	A	A	A	A	A	A	A	A	A	A	A	A	A	A	A	A	A	A	A	A	A	A	A	A	A	A	A	A	A	A	A	A
chr1H|HvGBSv2-6110_10967260+7	A/G	1	10967267	+	NA	NA	NA	NA	NA	NA	A	A	A	A	A	A	A	A	G	A	A	A	A	A	A	A	G	A	A	A	A	A	A	G	A	A	A	A	A	A	A	A	A	A	A	A	A	A	A
chr1H|HvGBSv2-6110_10967260+73	T/C	1	10967333	+	NA	NA	NA	NA	NA	NA	T	T	T	T	T	T	T	T	T	T	T	T	T	T	T	T	T	T	T	T	T	T	T	T	T	T	T	T	T	T	T	T	T	T	T	T	T	T	T
chr1H|HvGBSv2-6110_10967260+86	A/G	1	10967346	+	NA	NA	NA	NA	NA	NA	A	A	A	A	A	A	A	A	A	A	A	G	A	A	A	A	A	A	A	A	A	A	A	A	A	A	A	A	A	A	A	A	A	A	A	A	A	A	A
chr1H|HvGBSv2-6110_10967260+88	T/C	1	10967348	+	NA	NA	NA	NA	NA	NA	T	T	T	T	T	T	T	T	C	T	T	T	T	T	T	T	C	T	T	T	T	T	T	C	T	T	T	T	T	T	T	T	T	T	T	T	T	T	T
chr1H|HvGBSv2-6110_10967260+94	G/C	1	10967354	+	NA	NA	NA	NA	NA	NA	G	G	G	G	G	G	G	G	G	G	G	G	G	G	G	G	G	G	G	G	G	G	G	G	G	G	G	G	C	G	G	G	G	G	G	G	G	C	G
chr1H|HvGBSv2-6110_10967260+127	C/T	1	10967387	+	NA	NA	NA	NA	NA	NA	C	C	C	C	C	C	C	C	T	C	C	C	C	C	C	C	T	C	C	C	C	C	C	T	C	C	C	C	C	C	C	C	C	C	C	C	C	C	C
chr1H|HvGBSv2-6110_10967260+132	T/C	1	10967392	+	NA	NA	NA	NA	NA	NA	T	T	T	T	T	T	T	T	C	T	T	T	T	T	T	T	C	T	T	T	T	T	T	C	T	T	T	T	T	T	T	T	T	T	T	T	T	T	T
chr1H|HvGBSv2-6110_10967260+154	T/C	1	10967414	+	NA	NA	NA	NA	NA	NA	T	T	T	T	T	T	T	T	T	T	T	C	T	T	T	T	T	T	T	T	T	T	T	T	T	T	T	T	T	T	T	T	T	T	T	T	T	T	T
chr1H|HvGBSv2-26_11700418+45	T/C	1	11700463	+	NA	NA	NA	NA	NA	NA	T	T	T	T	T	T	T	T	T	T	T	T	T	T	T	T	T	T	T	C	T	T	T	T	T	C	T	T	T	T	T	T	T	T	T	T	C	T	T
chr1H|HvGBSv2-26_11700418+68	A/G	1	11700486	+	NA	NA	NA	NA	NA	NA	A	A	A	G	A	A	A	A	G	A	A	A	A	A	A	A	A	A	A	A	A	A	A	G	A	A	A	A	A	G	G	G	G	G	A	A	A	G	A
chr1H|HvGBSv2-26_11700418+86	G/A	1	11700504	+	NA	NA	NA	NA	NA	NA	A	G	G	G	G	G	G	G	G	G	G	G	G	G	G	A	G	G	G	G	G	G	G	G	G	G	G	G	G	G	G	G	G	G	G	G	G	G	A
chr1H|HvGBSv2-26_11700418+115	C/G	1	11700533	+	NA	NA	NA	NA	NA	NA	C	C	C	C	C	C	C	C	C	C	C	C	C	C	C	C	C	C	C	C	C	C	C	C	C	C	C	C	C	C	C	C	C	C	C	C	C	C	C
chr1H|HvGBSv2-26_11700418+137	G/A	1	11700555	+	NA	NA	NA	NA	NA	NA	G	G	G	G	G	G	R	G	G	R	G	G	G	G	G	G	G	G	G	G	G	R	G	G	G	G	G	G	G	G	G	G	G	G	G	G	G	G	G
chr1H|HvGBSv2-26_11700418+145	T/C	1	11700563	+	NA	NA	NA	NA	NA	NA	T	T	T	T	T	T	T	T	T	T	T	T	T	T	T	T	T	T	T	T	T	T	T	T	T	T	T	T	T	T	T	T	T	T	T	T	T	T	T
chr1H|HvGBSv2-28_12554254+17	G/C	1	12554271	+	NA	NA	NA	NA	NA	NA	G	G	C	C	G	G	G	G	G	G	G	G	G	G	G	G	G	G	G	G	G	G	G	G	G	G	G	G	G	G	G	G	G	G	G	G	G	G	G
chr1H|HvGBSv2-28_12554254+103	A/C	1	12554357	+	NA	NA	NA	NA	NA	NA	A	C	C	C	C	A	C	C	A	C	A	C	C	C	C	C	C	A	C	A	A	A	A	A	A	A	A	C	A	A	C	C	C	A	A	C	C	C	A
chr1H|HvGBSv2-28_12554254+136	T/A	1	12554390	+	NA	NA	NA	NA	NA	NA	T	A	T	T	T	T	T	A	T	T	T	A	A	A	A	T	T	T	T	T	T	T	A	T	T	T	T	A	T	T	A	A	A	T	T	A	A	A	T
chr1H|HvGBSv2-28_12554254+157	A/C	1	12554411	+	NA	NA	NA	NA	NA	NA	A	A	C	C	C	A	C	A	A	C	A	A	A	A	A	A	A	A	C	A	A	A	A	A	A	A	A	A	A	A	A	A	A	A	M	A	A	A	A
chr1H|HvGBSv2-29_13204612+41	A/G	1	13204653	+	NA	NA	NA	NA	NA	NA	A	G	A	A	G	A	G	A	A	A	A	A	A	G	A	A	A	A	A	G	A	A	A	A	A	A	A	A	A	A	A	G	G	A	A	A	A	A	A
chr1H|HvGBSv2-29_13204612+42	G/A	1	13204654	+	NA	NA	NA	NA	NA	NA	G	G	G	G	G	G	G	G	G	G	G	G	G	G	G	G	G	G	G	G	G	G	G	G	G	G	G	G	G	G	G	G	G	G	G	G	G	G	G
chr1H|HvGBSv2-30_13544702+2	T/A	1	13544704	+	NA	NA	NA	NA	NA	NA	T	T	T	T	A	T	A	T	T	A	A	T	T	T	T	T	A	T	T	T	T	T	T	T	T	A	A	T	T	T	T	T	T	T	T	T	T	T	T
chr1H|HvGBSv2-30_13544702+34	A/T	1	13544736	+	NA	NA	NA	NA	NA	NA	A	A	A	A	T	A	T	A	A	T	T	A	A	A	A	A	T	A	A	A	A	A	A	A	A	T	T	A	A	A	A	A	A	A	A	A	A	A	A
chr1H|HvGBSv2-30_13544702+35	T/G	1	13544737	+	NA	NA	NA	NA	NA	NA	T	T	T	T	G	T	G	T	T	G	G	T	T	T	T	T	G	T	T	T	T	T	T	T	T	G	G	T	T	T	T	T	T	T	T	T	T	T	T
chr1H|HvGBSv2-30_13544702+44	T/C	1	13544746	+	NA	NA	NA	NA	NA	NA	T	T	T	T	T	C	T	T	T	T	T	T	T	T	T	T	T	T	T	T	T	T	T	T	T	T	T	T	T	T	T	T	T	T	C	T	T	T	T
chr1H|HvGBSv2-30_13544702+54	T/C	1	13544756	+	NA	NA	NA	NA	NA	NA	T	T	T	T	T	T	T	T	T	T	T	T	T	T	T	C	T	T	T	T	T	T	T	T	C	T	T	C	T	T	T	T	T	C	T	T	C	T	T
chr1H|HvGBSv2-30_13544702+63	T/C	1	13544765	+	NA	NA	NA	NA	NA	NA	T	T	T	T	T	T	T	T	T	T	T	T	T	T	T	C	T	T	T	T	T	T	T	T	C	T	T	C	T	T	T	T	T	C	T	T	C	T	T
chr1H|HvGBSv2-30_13544702+64	G/A	1	13544766	+	NA	NA	NA	NA	NA	NA	G	G	G	G	G	G	G	G	G	G	G	G	G	G	G	A	G	G	G	G	G	G	G	G	A	G	G	A	G	G	G	G	G	A	G	G	A	G	G
chr1H|HvGBSv2-30_13544702+81	T/C	1	13544783	+	NA	NA	NA	NA	NA	NA	T	T	T	T	T	T	T	T	T	T	T	T	T	T	T	C	T	T	T	T	T	T	T	T	C	T	T	C	T	T	T	T	T	C	T	T	C	T	T
chr1H|HvGBSv2-30_13544702+100	C/A	1	13544802	+	NA	NA	NA	NA	NA	NA	C	C	C	C	C	C	C	C	C	C	C	C	C	C	C	A	C	C	C	C	C	C	C	C	A	C	C	A	C	C	C	C	C	A	C	C	A	C	C
chr1H|HvGBSv2-30_13544702+102	A/G	1	13544804	+	NA	NA	NA	NA	NA	NA	A	A	A	A	A	A	A	A	A	A	A	A	A	A	A	A	A	G	A	A	G	A	A	G	A	A	A	A	A	A	A	A	A	A	A	A	A	A	A
chr1H|HvGBSv2-30_13544702+127	A/G	1	13544829	+	NA	NA	NA	NA	NA	NA	A	A	A	A	A	A	A	A	A	A	A	A	A	A	A	G	A	A	A	A	A	A	A	A	G	A	A	G	A	A	A	A	A	G	A	A	G	A	A
chr1H|HvGBSv2-30_13544702+128	T/C	1	13544830	+	NA	NA	NA	NA	NA	NA	T	T	T	T	T	T	T	T	T	T	T	T	T	T	T	C	T	T	T	T	T	T	T	T	C	T	T	C	T	T	T	T	T	C	T	T	C	T	T
chr1H|HvGBSv2-30_13544702+133	G/C	1	13544835	+	NA	NA	NA	NA	NA	NA	G	G	G	G	G	G	G	G	G	G	G	G	G	G	G	C	G	G	G	G	G	G	G	G	C	G	G	C	G	G	G	G	G	C	G	G	C	G	G
chr1H|HvGBSv2-30_13544702+134	C/T	1	13544836	+	NA	NA	NA	NA	NA	NA	C	C	C	C	C	C	C	C	C	C	C	C	C	C	C	T	C	C	C	C	C	C	C	C	T	C	C	T	C	C	C	C	C	T	C	C	T	C	C
chr1H|HvGBSv2-30_13544702+143	C/A	1	13544845	+	NA	NA	NA	NA	NA	NA	C	C	C	C	A	A	A	C	C	A	A	C	C	C	C	C	A	C	A	C	C	A	C	C	C	A	A	C	C	C	A	C	C	C	A	A	C	C	C
chr1H|HvGBSv2-30_13544702+153	A/G	1	13544855	+	NA	NA	NA	NA	NA	NA	A	A	A	A	G	G	G	A	A	G	G	A	A	A	A	A	G	A	G	A	A	G	A	A	A	G	G	A	A	A	G	A	A	A	G	G	A	A	A
chr1H|HvGBSv2-6115_13732899+25	G/T	1	13732924	+	NA	NA	NA	NA	NA	NA	G	G	G	G	G	G	G	G	G	G	G	G	G	G	G	G	T	G	G	T	G	T	G	G	G	G	G	G	G	G	G	G	G	G	G	T	G	T	G
chr1H|HvGBSv2-6115_13732899+59	G/A	1	13732958	+	NA	NA	NA	NA	NA	NA	G	G	G	G	G	G	G	G	G	G	G	G	G	G	G	G	G	G	G	G	G	G	G	G	G	G	G	G	A	G	G	G	G	G	G	G	G	G	G
chr1H|HvGBSv2-6115_13732899+62	C/T	1	13732961	+	NA	NA	NA	NA	NA	NA	C	C	T	T	C	C	C	C	C	C	C	C	C	C	C	C	C	C	C	C	C	C	C	C	C	C	C	C	C	C	C	C	C	C	C	C	C	C	C
chr1H|HvGBSv2-6115_13732899+116	C/A	1	13733015	+	NA	NA	NA	NA	NA	NA	C	C	C	C	C	A	C	A	A	A	A	A	C	C	C	C	C	A	C	C	A	C	A	A	C	A	A	A	C	A	C	A	A	C	C	C	C	C	C
chr1H|HvGBSv2-6115_13732899+144	G/A	1	13733043	+	NA	NA	NA	NA	NA	NA	G	G	G	G	G	G	G	G	G	G	G	G	G	G	G	G	G	G	G	G	G	G	G	G	G	G	G	G	A	G	G	G	G	G	G	G	G	G	G
chr1H|HvGBSv2-6115_13732899+156	C/T	1	13733055	+	NA	NA	NA	NA	NA	NA	C	C	C	C	C	T	C	T	T	T	T	T	C	C	C	C	C	T	C	C	T	C	T	T	C	T	T	T	C	T	C	T	T	C	C	C	C	C	C
chr1H|HvGBSv2-31_13967200+10	C/T	1	13967210	+	NA	NA	NA	NA	NA	NA	C	C	C	C	C	C	T	C	C	T	C	C	C	C	C	C	T	C	C	C	C	T	C	C	C	C	C	C	C	C	C	C	C	C	C	T	C	T	C
chr1H|HvGBSv2-31_13967200+17	A/G	1	13967217	+	NA	NA	NA	NA	NA	NA	A	A	A	A	A	A	G	A	A	G	A	A	A	A	A	A	G	A	A	A	A	G	A	A	A	A	A	A	A	A	A	A	A	A	A	G	A	G	A
chr1H|HvGBSv2-31_13967200+33	G/A	1	13967233	+	NA	NA	NA	NA	NA	NA	G	G	G	G	G	G	A	G	G	A	G	G	G	G	G	G	A	G	G	G	G	A	G	G	G	G	G	G	G	G	G	G	G	G	G	A	G	A	G
chr1H|HvGBSv2-31_13967200+59	A/G	1	13967259	+	NA	NA	NA	NA	NA	NA	A	A	A	A	A	A	G	A	A	G	A	A	A	A	A	A	G	A	A	A	A	G	A	A	A	A	A	A	A	A	A	A	A	A	A	G	A	G	A
chr1H|HvGBSv2-31_13967200+63	C/T	1	13967263	+	NA	NA	NA	NA	NA	NA	C	C	C	C	C	C	T	C	C	T	C	C	C	C	C	C	T	C	C	C	C	T	C	C	C	C	C	C	C	C	C	C	C	C	C	T	C	T	C
chr1H|HvGBSv2-31_13967200+127	A/G	1	13967327	+	NA	NA	NA	NA	NA	NA	A	A	A	A	A	A	A	A	A	A	A	G	A	A	A	A	A	G	A	A	G	A	A	A	A	A	A	A	A	A	A	A	A	A	A	A	A	A	A
chr1H|HvGBSv2-6116_14170634+39	A/G	1	14170673	+	NA	NA	NA	NA	NA	NA	G	A	G	G	A	A	A	A	A	A	A	A	G	A	A	A	A	G	A	A	A	A	A	A	G	A	A	A	A	A	G	A	G	G	A	G	A	A	A
chr1H|HvGBSv2-6116_14170634+90	T/C	1	14170724	+	NA	NA	NA	NA	NA	NA	T	T	T	T	T	T	T	T	T	T	T	T	T	C	T	T	T	T	T	C	T	T	T	T	C	T	T	T	T	T	T	T	T	C	T	T	T	T	T
chr1H|HvGBSv2-6116_14170634+107	G/A	1	14170741	+	NA	NA	NA	NA	NA	NA	G	G	G	G	G	G	G	G	G	G	G	G	G	A	G	G	G	G	G	A	G	G	G	G	A	G	G	G	G	G	G	G	G	A	G	G	G	G	G
chr1H|HvGBSv2-6116_14170634+156	A/G	1	14170790	+	NA	NA	NA	NA	NA	NA	A	A	A	A	A	R	A	A	A	A	A	A	A	A	A	A	A	A	A	A	A	A	R	A	A	A	A	A	A	A	A	A	A	A	A	A	A	A	A
chr1H|HvGBSv2-6116_14170634+168	G/A	1	14170802	+	NA	NA	NA	NA	NA	NA	G	G	G	G	G	G	G	G	G	G	G	G	G	A	G	G	G	G	G	A	G	G	G	G	A	G	G	G	G	G	G	G	G	A	G	G	G	G	G
chr1H|HvGBSv2-32_14385087+29	G/A	1	14385116	+	NA	NA	NA	NA	NA	NA	G	G	G	G	G	G	G	G	G	G	G	G	G	G	G	G	G	G	G	G	G	G	A	G	G	G	G	G	G	G	G	G	G	G	G	G	G	G	G
chr1H|HvGBSv2-32_14385087+38	C/T	1	14385125	+	NA	NA	NA	NA	NA	NA	C	C	C	C	C	C	C	C	C	C	C	C	C	C	C	C	C	C	C	C	C	C	T	C	C	C	C	C	C	C	C	C	C	C	C	C	C	C	C
chr1H|HvGBSv2-32_14385087+44	A/G	1	14385131	+	NA	NA	NA	NA	NA	NA	A	A	A	A	A	A	A	A	A	A	A	A	A	A	A	A	A	A	A	A	A	A	G	A	A	A	A	A	A	A	A	A	A	A	A	A	A	A	A
chr1H|HvGBSv2-32_14385087+62	A/G	1	14385149	+	NA	NA	NA	NA	NA	NA	A	A	A	A	A	A	A	A	A	A	A	A	A	A	A	A	A	A	A	A	A	A	G	A	A	A	A	A	A	A	A	A	A	A	A	A	A	A	A
chr1H|HvGBSv2-32_14385087+77	C/G	1	14385164	+	NA	NA	NA	NA	NA	NA	C	C	C	C	C	C	C	C	C	C	C	C	C	C	C	C	C	C	C	C	C	C	G	C	C	C	C	C	C	C	C	C	C	C	C	C	C	C	C
chr1H|HvGBSv2-32_14385087+111	G/C	1	14385198	+	NA	NA	NA	NA	NA	NA	G	G	G	G	G	G	G	G	G	G	G	G	G	G	G	G	G	G	G	G	G	G	C	G	G	G	G	G	G	G	G	G	G	G	G	G	G	G	G
chr1H|HvGBSv2-32_14385087+114	T/C	1	14385201	+	NA	NA	NA	NA	NA	NA	C	T	T	T	T	T	T	T	T	T	T	T	T	C	C	T	T	T	T	C	T	T	T	T	C	T	T	T	T	T	T	C	C	C	T	T	T	T	T
chr1H|HvGBSv2-32_14385087+117	T/C	1	14385204	+	NA	NA	NA	NA	NA	NA	C	T	T	T	T	T	T	T	T	T	T	T	T	C	C	T	T	T	T	C	T	T	T	T	C	T	T	T	T	T	T	C	C	C	T	T	T	T	T
chr1H|HvGBSv2-32_14385087+124	A/C	1	14385211	+	NA	NA	NA	NA	NA	NA	A	A	A	A	C	A	C	A	A	C	A	C	A	A	A	A	C	C	C	A	C	A	A	A	A	A	A	C	C	C	A	A	A	A	C	A	A	A	A
chr1H|HvGBSv2-32_14385087+137	T/C	1	14385224	+	NA	NA	NA	NA	NA	NA	T	T	T	T	T	T	T	T	T	T	T	T	T	T	T	T	T	T	T	T	T	T	C	T	T	T	T	T	T	T	T	T	T	T	T	T	T	T	T
chr1H|HvGBSv2-32_14385087+147	G/A	1	14385234	+	NA	NA	NA	NA	NA	NA	A	G	A	A	G	G	G	G	G	G	G	G	G	A	A	G	G	G	G	A	G	A	A	G	A	G	G	G	G	G	G	A	A	A	G	G	G	A	G
chr1H|HvGBSv2-32_14385087+151	T/G	1	14385238	+	NA	NA	NA	NA	NA	NA	T	T	T	T	T	T	T	T	T	T	T	T	T	T	T	T	T	T	T	T	T	T	G	T	T	T	T	T	T	T	T	T	T	T	T	T	T	T	T
chr1H|HvGBSv2-32_14385087+161	C/T	1	14385248	+	NA	NA	NA	NA	NA	NA	C	C	C	C	C	C	C	C	C	C	C	C	C	C	C	C	C	C	C	C	C	C	T	C	C	C	C	C	C	C	C	C	C	C	C	C	C	C	C
chr1H|HvGBSv2-6117_14631956+54	G/A	1	14632010	+	NA	NA	NA	NA	NA	NA	G	G	G	G	G	G	G	G	G	G	G	G	G	G	G	G	G	G	G	G	G	G	A	G	G	G	G	G	G	G	G	G	G	G	G	G	G	G	G
chr1H|HvGBSv2-6117_14631956+126	T/C	1	14632082	+	NA	NA	NA	NA	NA	NA	C	T	T	T	T	T	T	T	T	T	T	T	T	C	T	T	T	C	T	C	T	T	T	T	C	C	T	T	T	T	T	C	C	C	T	C	C	T	T
chr1H|HvGBSv2-33_14819434+28	A/G	1	14819462	+	NA	NA	NA	NA	NA	NA	A	A	A	A	G	G	G	G	G	G	G	G	G	A	A	A	G	G	G	A	G	A	A	G	A	G	G	G	R	G	G	A	A	A	G	A	A	A	G
chr1H|HvGBSv2-33_14819434+45	G/C	1	14819479	+	NA	NA	NA	NA	NA	NA	G	G	C	C	G	G	G	G	G	G	G	G	G	G	C	G	G	G	G	G	G	C	G	G	G	G	G	G	G	G	G	G	G	G	G	G	G	C	G
chr1H|HvGBSv2-33_14819434+138	T/G	1	14819572	+	NA	NA	NA	NA	NA	NA	T	T	T	T	T	T	T	T	T	T	T	T	T	G	T	T	T	T	T	G	T	T	T	T	G	T	T	T	T	T	T	G	G	G	T	T	T	T	T
chr1H|HvGBSv2-6118_15064940+79	G/T	1	15065019	+	NA	NA	NA	NA	NA	NA	G	T	G	G	G	G	G	G	G	G	G	G	G	G	G	G	G	G	G	G	G	G	G	G	G	G	G	G	G	G	G	G	G	G	G	G	G	G	G
chr1H|HvGBSv2-6118_15064940+98	G/A	1	15065038	+	NA	NA	NA	NA	NA	NA	G	A	G	G	G	G	G	G	G	G	G	G	G	G	G	G	G	G	G	G	G	G	G	G	G	G	G	G	G	G	G	G	G	G	G	G	G	G	G
chr1H|HvGBSv2-6118_15064940+104	T/G	1	15065044	+	NA	NA	NA	NA	NA	NA	G	G	T	T	T	T	T	T	T	T	T	T	T	G	T	T	T	T	T	G	T	T	T	T	G	T	T	T	T	T	T	G	G	G	T	G	T	T	T
chr1H|HvGBSv2-6118_15064940+110	A/G	1	15065050	+	NA	NA	NA	NA	NA	NA	A	G	A	A	A	A	A	A	A	A	A	A	A	A	A	A	A	A	A	A	A	A	A	A	A	A	A	A	A	A	A	A	A	A	A	A	A	A	A
chr1H|HvGBSv2-34_15296639+42	T/G	1	15296681	+	NA	NA	NA	NA	NA	NA	T	T	G	G	T	T	T	T	T	T	T	T	T	T	G	T	T	T	T	T	T	G	G	T	T	T	T	T	T	T	T	T	T	T	T	T	T	G	T
chr1H|HvGBSv2-34_15296639+89	T/C	1	15296728	+	NA	NA	NA	NA	NA	NA	T	T	T	T	T	T	T	T	T	T	T	T	T	T	T	T	T	T	T	T	T	T	T	T	T	T	T	T	T	T	T	T	T	T	T	T	T	T	T
chr1H|HvGBSv2-34_15296639+100	G/A	1	15296739	+	NA	NA	NA	NA	NA	NA	G	A	G	G	G	G	G	G	G	G	G	G	G	G	G	G	G	G	G	G	G	G	G	G	G	G	G	G	G	G	G	G	G	G	G	G	G	G	G
chr1H|HvGBSv2-6119_15549406+46	A/T	1	15549452	+	NA	NA	NA	NA	NA	NA	A	T	T	T	A	A	T	A	A	T	A	A	T	T	T	T	A	A	A	T	A	T	T	A	A	A	A	A	A	A	A	A	A	T	A	A	A	T	A
chr1H|HvGBSv2-6119_15549406+49	G/A	1	15549455	+	NA	NA	NA	NA	NA	NA	A	G	G	G	A	A	A	A	G	A	A	A	G	G	G	G	A	A	A	G	A	G	G	G	G	A	A	A	G	A	G	G	G	G	A	G	G	G	G
chr1H|HvGBSv2-6119_15549406+52	A/G	1	15549458	+	NA	NA	NA	NA	NA	NA	A	G	G	G	A	A	G	A	A	G	A	A	G	G	G	G	A	A	A	G	A	G	G	A	A	A	A	A	A	A	A	A	A	G	A	A	A	G	A
chr1H|HvGBSv2-6119_15549406+107	A/G	1	15549513	+	NA	NA	NA	NA	NA	NA	A	A	A	A	A	A	A	A	A	A	A	A	A	G	A	A	A	A	A	G	A	A	A	A	G	A	A	A	A	A	A	G	G	G	A	A	A	A	A
chr1H|HvGBSv2-6119_15549406+144	A/G	1	15549550	+	NA	NA	NA	NA	NA	NA	A	A	A	A	A	A	A	A	A	A	A	A	A	A	A	A	A	A	A	A	A	A	A	A	A	A	A	A	G	A	A	A	A	A	A	A	A	A	A
chr1H|HvGBSv2-6119_15549406+175	G/A	1	15549581	+	NA	NA	NA	NA	NA	NA	G	G	A	A	G	G	G	G	G	G	G	G	G	G	A	G	G	G	G	G	G	A	G	G	G	G	G	G	G	G	G	G	G	G	G	G	G	A	G
chr1H|HvGBSv2-6119_15549406+177	G/C	1	15549583	+	NA	NA	NA	NA	NA	NA	G	G	G	G	G	G	G	G	C	G	G	G	G	G	G	G	G	G	G	G	G	G	G	C	G	G	G	G	G	G	C	G	G	G	G	G	G	G	C
chr1H|HvGBSv2-6119_15549406+178	C/A	1	15549584	+	NA	NA	NA	NA	NA	NA	C	C	C	C	C	C	C	C	A	C	C	C	C	C	C	C	C	C	C	C	C	C	C	A	C	C	C	C	C	C	A	C	C	C	C	C	C	C	A
chr1H|HvGBSv2-6119_15549406+179	G/C	1	15549585	+	NA	NA	NA	NA	NA	NA	G	G	G	G	G	G	G	G	C	G	G	G	G	G	G	G	G	G	G	G	G	G	G	C	G	G	G	G	G	G	C	G	G	G	G	G	G	G	C
chr1H|HvGBSv2-6119_15549406+184	T/C	1	15549590	+	NA	NA	NA	NA	NA	NA	C	T	T	T	C	C	C	C	T	C	C	C	T	T	T	T	C	C	C	T	C	T	T	T	T	C	C	C	T	C	T	T	T	T	C	T	T	T	T
chr1H|HvGBSv2-6119_15553526+8	A/G	1	15553534	+	NA	NA	NA	NA	NA	NA	A	G	G	G	A	A	A	A	A	A	A	A	G	A	G	G	A	A	A	A	A	G	G	A	A	A	A	A	A	A	A	A	A	A	A	A	A	A	A
chr1H|HvGBSv2-6119_15553526+10	T/C	1	15553536	+	NA	NA	NA	NA	NA	NA	C	T	T	T	C	C	C	C	T	C	C	C	T	T	T	T	C	C	C	T	C	T	C	T	T	C	C	C	T	C	T	T	T	T	C	T	T	T	T
chr1H|HvGBSv2-6119_15553526+20	G/C	1	15553546	+	NA	NA	NA	NA	NA	NA	G	C	C	C	G	G	G	G	G	G	G	G	C	G	C	C	G	G	G	G	G	C	C	G	G	G	G	G	G	G	G	G	G	G	G	G	G	G	G
chr1H|HvGBSv2-6119_15553526+52	G/A	1	15553578	+	NA	NA	NA	NA	NA	NA	G	A	A	A	G	G	G	G	G	G	G	G	A	G	A	A	G	G	G	G	G	A	A	G	G	G	G	G	G	G	G	G	G	G	G	G	G	G	G
chr1H|HvGBSv2-6119_15553526+175	G/A	1	15553701	+	NA	NA	NA	NA	NA	NA	G	G	G	G	G	G	G	G	G	G	G	G	G	A	G	G	G	G	G	A	G	G	G	G	A	G	G	G	G	G	G	A	A	A	G	G	G	G	G
chr1H|HvGBSv2-6119_15553526+180	A/T	1	15553706	+	NA	NA	NA	NA	NA	NA	A	A	A	A	A	A	A	A	A	A	A	A	A	T	A	A	A	A	A	T	A	A	A	A	T	A	A	A	A	A	A	T	T	T	A	A	A	A	A
chr1H|HvGBSv2-6119_15553526+181	T/C	1	15553707	+	NA	NA	NA	NA	NA	NA	T	T	T	T	T	T	T	T	T	T	T	T	T	C	T	T	T	T	T	C	T	T	T	T	C	T	T	T	T	T	T	C	C	C	T	T	T	T	T
chr1H|HvGBSv2-6119_15553526+182	A/G	1	15553708	+	NA	NA	NA	NA	NA	NA	A	A	A	A	A	A	A	A	A	A	A	A	A	G	A	A	A	A	A	G	A	A	A	A	G	A	A	A	A	A	A	G	G	G	A	A	A	A	A
chr1H|HvGBSv2-6119_15553526+183	C/G	1	15553709	+	NA	NA	NA	NA	NA	NA	C	C	C	C	C	C	C	C	C	C	C	C	C	G	C	C	C	C	C	G	C	C	C	C	G	C	C	C	C	C	C	G	G	G	C	C	C	C	C
chr1H|HvGBSv2-6119_15553526+184	G/C	1	15553710	+	NA	NA	NA	NA	NA	NA	G	G	G	G	G	G	G	G	G	G	G	G	G	C	G	G	G	G	G	C	G	G	G	G	C	G	G	G	G	G	G	C	C	C	G	G	G	G	G
chr1H|HvGBSv2-36_16189743+11	T/C	1	16189754	+	NA	NA	NA	NA	NA	NA	T	T	C	C	T	T	T	T	C	T	T	T	T	T	T	T	T	T	T	T	T	C	T	C	T	T	T	T	T	T	T	T	T	T	T	T	T	T	T
chr1H|HvGBSv2-36_16189743+61	G/A	1	16189804	+	NA	NA	NA	NA	NA	NA	G	G	G	G	G	A	G	G	G	G	G	G	G	A	G	G	G	G	G	G	G	G	G	G	A	G	G	G	G	G	G	A	A	A	G	G	G	A	G
chr1H|HvGBSv2-36_16189743+79	C/T	1	16189822	+	NA	NA	NA	NA	NA	NA	C	T	C	C	C	C	C	C	C	C	T	C	C	C	T	C	C	C	C	C	C	C	T	C	C	C	C	C	T	C	C	C	C	C	C	C	C	C	C
chr1H|HvGBSv2-36_16189743+85	T/A	1	16189828	+	NA	NA	NA	NA	NA	NA	T	A	T	T	T	T	T	T	T	T	A	T	T	T	A	T	T	T	T	T	T	T	A	T	T	T	T	T	A	T	T	T	T	T	T	T	T	T	T
chr1H|HvGBSv2-36_16189743+108	A/G	1	16189851	+	NA	NA	NA	NA	NA	NA	A	G	G	G	A	A	A	A	G	A	G	A	A	A	G	A	G	A	A	A	A	G	G	G	A	A	A	A	G	A	A	A	A	A	A	A	A	A	A
chr1H|HvGBSv2-6121_16432863+10	G/C	1	16432873	+	NA	NA	NA	NA	NA	NA	G	G	G	G	G	G	G	G	G	G	G	G	G	G	G	C	G	G	G	G	G	G	G	G	G	G	G	G	G	G	G	G	G	G	G	G	G	G	G
chr1H|HvGBSv2-6121_16432863+20	T/C	1	16432883	+	NA	NA	NA	NA	NA	NA	C	T	T	T	C	T	C	C	T	C	T	C	T	T	T	T	C	C	C	T	C	T	T	T	T	C	C	C	T	C	T	T	T	T	T	T	T	T	C
chr1H|HvGBSv2-6121_16432863+45	T/C	1	16432908	+	NA	NA	NA	NA	NA	NA	T	T	T	T	T	T	T	T	T	T	T	T	C	T	T	T	T	T	T	C	T	T	T	T	T	T	T	T	T	T	C	T	T	C	C	C	T	T	T
chr1H|HvGBSv2-6121_16432863+51	T/C	1	16432914	+	NA	NA	NA	NA	NA	NA	T	T	T	T	T	C	T	T	T	T	T	T	T	C	T	T	T	T	T	T	T	T	T	T	C	T	T	T	T	T	T	C	C	T	T	T	T	C	T
chr1H|HvGBSv2-6121_16432863+66	A/G	1	16432929	+	NA	NA	NA	NA	NA	NA	A	A	A	A	A	A	A	A	A	A	A	A	A	A	A	A	A	A	A	A	A	A	A	A	A	A	A	A	A	A	A	A	A	A	A	A	G	A	A
chr1H|HvGBSv2-6121_16432863+85	G/T	1	16432948	+	NA	NA	NA	NA	NA	NA	G	T	T	T	G	G	G	G	T	G	T	G	G	G	T	G	G	G	G	G	G	T	T	T	G	G	G	G	T	G	G	G	G	G	G	G	G	G	G
chr1H|HvGBSv2-6121_16432863+136	A/G	1	16432999	+	NA	NA	NA	NA	NA	NA	A	A	A	A	A	A	A	A	A	A	A	A	G	A	A	A	A	A	A	G	A	A	A	A	A	A	A	A	A	A	G	A	A	G	G	G	A	A	A
chr1H|HvGBSv2-6122_16876378+83	A/G	1	16876461	+	NA	NA	NA	NA	NA	NA	G	A	A	A	G	A	G	G	A	G	A	G	A	A	A	A	G	G	G	A	G	A	A	A	A	G	G	G	A	G	G	A	A	A	G	A	A	A	R
chr1H|HvGBSv2-10756_17178934+13	G/C	1	17178947	+	NA	NA	NA	NA	NA	NA	C	G	G	G	C	G	C	C	G	C	G	C	G	G	G	G	C	C	C	G	C	G	G	G	G	C	C	C	G	C	C	G	G	G	C	G	G	G	C
chr1H|HvGBSv2-10756_17178934+59	A/G	1	17178993	+	NA	NA	NA	NA	NA	NA	G	A	A	A	G	A	G	G	A	G	A	G	A	A	A	A	G	G	G	A	G	A	A	A	A	G	G	G	A	G	G	A	A	A	G	A	A	A	G
chr1H|HvGBSv2-10756_17178934+78	A/G	1	17179012	+	NA	NA	NA	NA	NA	NA	G	A	A	A	G	A	G	G	A	G	A	G	A	A	A	A	G	G	G	A	G	A	A	A	A	G	G	G	A	G	G	A	A	A	G	A	A	A	G
chr1H|HvGBSv2-10756_17178934+103	A/G	1	17179037	+	NA	NA	NA	NA	NA	NA	A	G	A	A	A	A	A	A	A	A	A	A	A	A	G	G	A	A	A	G	A	A	A	A	A	A	A	A	G	A	A	A	A	A	A	R	A	A	A
chr1H|HvGBSv2-10756_17178934+120	A/G	1	17179054	+	NA	NA	NA	NA	NA	NA	G	A	A	A	G	A	G	G	A	G	A	G	A	A	A	A	G	G	G	A	G	A	A	A	A	G	G	G	A	G	G	A	A	A	G	A	A	A	G
chr1H|HvGBSv2-10756_17178934+127	A/G	1	17179061	+	NA	NA	NA	NA	NA	NA	A	A	A	A	A	G	A	A	A	A	G	A	A	G	A	A	A	A	A	A	A	G	G	A	G	A	A	A	A	A	A	G	G	A	A	A	A	G	A
chr1H|HvGBSv2-6123_17313697+24	C/T	1	17313721	+	NA	NA	NA	NA	NA	NA	C	C	C	C	C	C	C	C	C	C	C	Y	C	C	C	C	C	C	C	C	C	C	C	C	C	C	C	C	C	C	C	C	C	C	C	C	C	C	C
chr1H|HvGBSv2-6123_17313697+91	A/G	1	17313788	+	NA	NA	NA	NA	NA	NA	A	A	G	G	A	A	A	A	R	A	A	A	A	A	A	A	A	A	A	A	A	R	A	G	A	A	A	A	A	A	A	A	A	A	A	A	A	A	A
chr1H|HvGBSv2-6123_17313697+95	C/T	1	17313792	+	NA	NA	NA	NA	NA	NA	C	C	C	C	C	T	C	C	C	C	T	C	C	T	C	C	C	C	C	C	C	C	T	C	T	C	C	C	C	C	C	T	T	C	C	C	C	T	C
chr1H|HvGBSv2-6123_17313697+100	T/C	1	17313797	+	NA	NA	NA	NA	NA	NA	T	T	T	T	T	T	T	T	T	T	T	T	T	T	T	T	T	T	T	T	T	T	T	T	T	Y	Y	T	T	T	T	T	T	T	T	T	T	T	T
chr1H|HvGBSv2-6123_17313697+101	A/G	1	17313798	+	NA	NA	NA	NA	NA	NA	A	A	A	A	A	A	A	A	A	A	A	A	A	A	A	A	A	A	A	A	A	A	A	A	A	A	A	A	A	A	A	A	A	A	R	A	A	A	A
chr1H|HvGBSv2-6123_17313697+110	T/G	1	17313807	+	NA	NA	NA	NA	NA	NA	T	T	G	G	T	T	T	T	K	T	T	T	T	T	T	T	T	T	T	T	T	K	T	G	T	T	T	T	T	T	T	T	T	T	T	T	T	T	T
chr1H|HvGBSv2-6123_17313697+140	A/G	1	17313837	+	NA	NA	NA	NA	NA	NA	A	A	A	A	A	A	A	A	A	A	A	R	A	A	A	A	A	A	A	A	A	A	A	A	A	A	A	A	A	A	A	A	A	A	A	A	A	A	A
chr1H|HvGBSv2-39_17555467+51	A/G	1	17555518	+	NA	NA	NA	NA	NA	NA	A	A	A	A	A	A	A	A	A	A	A	A	G	A	A	A	A	A	A	A	A	A	A	A	A	A	A	A	A	A	A	A	A	A	A	G	A	A	A
chr1H|HvGBSv2-39_17555467+64	C/T	1	17555531	+	NA	NA	NA	NA	NA	NA	C	T	T	T	C	T	C	C	T	C	T	C	T	T	T	C	C	C	C	C	C	T	T	T	T	C	C	C	T	C	C	T	T	C	C	T	T	T	C
chr1H|HvGBSv2-39_17555467+118	T/C	1	17555585	+	NA	NA	NA	NA	NA	NA	T	C	C	C	T	C	T	T	C	T	C	T	C	C	C	T	T	T	T	T	T	C	C	C	C	T	T	T	C	T	T	C	C	T	T	C	C	C	T
chr1H|HvGBSv2-40_17988442+18	T/G	1	17988460	+	NA	NA	NA	NA	NA	NA	T	T	G	G	T	T	T	T	T	T	T	T	T	T	T	T	T	T	T	T	T	G	T	T	T	T	T	T	T	G	T	T	T	T	T	T	T	T	T
chr1H|HvGBSv2-40_17988442+34	G/T	1	17988476	+	NA	NA	NA	NA	NA	NA	G	G	G	T	G	G	G	G	G	G	G	G	G	G	G	T	G	G	G	G	G	T	G	G	G	G	G	G	G	G	G	G	G	G	G	G	G	G	G
chr1H|HvGBSv2-40_17988442+42	C/T	1	17988484	+	NA	NA	NA	NA	NA	NA	C	C	T	T	C	C	C	C	C	C	C	C	C	C	C	C	C	C	C	C	C	T	C	C	C	C	C	C	C	T	C	C	C	C	C	C	C	C	C
chr1H|HvGBSv2-40_17988442+51	T/A	1	17988493	+	NA	NA	NA	NA	NA	NA	T	T	A	A	T	T	T	T	T	T	T	T	T	T	T	T	T	T	T	T	T	A	T	T	T	T	T	T	T	A	T	T	T	T	T	T	T	T	T
chr1H|HvGBSv2-40_17988442+62	C/T	1	17988504	+	NA	NA	NA	NA	NA	NA	C	C	C	C	C	C	C	C	T	C	C	T	C	C	C	C	C	C	C	C	C	C	C	T	T	C	C	C	C	C	C	T	T	T	T	C	C	T	C
chr1H|HvGBSv2-40_17988442+121	C/T	1	17988563	+	NA	NA	NA	NA	NA	NA	C	C	C	T	C	C	C	C	C	C	C	C	C	C	C	T	C	C	C	C	C	T	C	C	C	C	C	C	C	C	C	C	C	C	C	C	C	C	C
chr1H|HvGBSv2-40_17988442+151	G/A	1	17988593	+	NA	NA	NA	NA	NA	NA	G	G	G	A	G	G	G	G	G	G	G	G	G	G	G	A	G	G	G	G	G	A	G	G	G	G	G	G	G	G	G	G	G	G	G	G	G	G	G
chr1H|HvGBSv2-40_17988442+157	A/G	1	17988599	+	NA	NA	NA	NA	NA	NA	A	A	A	A	A	A	A	A	A	A	A	A	A	A	A	G	A	A	A	A	A	A	A	A	A	A	A	A	A	A	A	A	A	A	A	A	A	A	A
chr1H|HvGBSv2-6125_18270549+152	T/C	1	18270701	+	NA	NA	NA	NA	NA	NA	T	T	C	C	T	T	T	C	T	T	T	C	C	T	T	C	T	T	T	T	C	C	C	T	C	T	T	C	T	C	C	C	C	T	T	C	T	T	C
chr1H|HvGBSv2-42_18901970+65	A/T	1	18902035	+	NA	NA	NA	NA	NA	NA	A	A	A	A	A	A	A	A	T	A	A	A	A	A	A	A	A	A	A	A	A	A	A	T	A	A	A	A	A	A	A	A	A	A	T	A	A	A	A
chr1H|HvGBSv2-10756_18994559+15	A/G	1	18994574	+	NA	NA	NA	NA	NA	NA	A	A	A	A	A	A	A	A	A	A	A	A	A	A	A	A	A	A	A	A	A	A	A	A	A	A	A	A	A	A	A	A	A	R	R	A	A	A	A
chr1H|HvGBSv2-10756_18994559+22	T/G	1	18994581	+	NA	NA	NA	NA	NA	NA	T	T	G	K	T	T	T	T	T	T	T	T	T	T	K	T	T	T	T	T	T	K	T	T	T	T	T	T	T	T	T	T	T	T	T	T	T	T	T
chr1H|HvGBSv2-10756_18994559+39	G/C	1	18994598	+	NA	NA	NA	NA	NA	NA	G	G	G	G	G	G	G	G	G	G	G	G	G	G	G	G	G	G	G	G	G	G	G	G	G	G	G	G	G	G	G	G	G	G	G	G	G	G	G
chr1H|HvGBSv2-10756_18994559+49	A/G	1	18994608	+	NA	NA	NA	NA	NA	NA	A	A	A	A	G	A	A	A	A	A	A	A	A	A	R	A	A	A	R	A	A	A	A	A	A	A	G	A	A	A	A	A	A	A	A	A	A	A	A
chr1H|HvGBSv2-10756_18994559+108	T/G	1	18994667	+	NA	NA	NA	NA	NA	NA	T	T	T	T	T	T	T	T	T	T	T	T	T	T	T	T	T	T	T	T	T	T	T	T	T	T	T	T	T	T	T	T	T	T	T	T	T	T	T
chr1H|HvGBSv2-10756_18994559+119	A/G	1	18994678	+	NA	NA	NA	NA	NA	NA	A	A	G	R	A	A	A	A	A	A	A	A	A	A	R	A	A	A	A	A	A	R	A	A	A	A	A	A	A	A	A	A	A	A	A	A	A	A	A
chr1H|HvGBSv2-10756_18994559+123	A/G	1	18994682	+	NA	NA	NA	NA	NA	NA	A	A	G	R	A	A	A	A	A	A	A	A	A	A	R	A	A	A	A	A	A	R	A	A	A	A	A	A	A	A	A	A	A	A	A	A	A	A	A
chr1H|HvGBSv2-10756_18994559+130	A/G	1	18994689	+	NA	NA	NA	NA	NA	NA	A	A	G	R	A	A	A	A	A	A	A	A	A	A	R	A	A	A	A	A	A	R	A	A	A	A	A	A	A	A	A	A	A	A	A	A	A	A	A
chr1H|HvGBSv2-10756_18994559+131	T/C	1	18994690	+	NA	NA	NA	NA	NA	NA	T	T	T	T	T	T	T	T	T	T	T	T	T	T	T	T	T	T	T	T	T	T	T	T	T	T	T	T	T	T	T	T	T	T	T	T	T	T	T
chr1H|HvGBSv2-10756_18994559+151	A/G	1	18994710	+	NA	NA	NA	NA	NA	NA	A	A	G	R	A	A	A	A	A	A	A	A	A	A	R	A	A	A	A	A	A	R	A	A	A	A	A	A	A	A	A	A	A	A	A	A	A	A	A
chr1H|HvGBSv2-10756_18994559+152	C/T	1	18994711	+	NA	NA	NA	NA	NA	NA	C	C	T	Y	C	C	C	C	C	C	C	C	C	C	Y	C	C	C	C	C	C	Y	C	C	C	C	C	C	C	C	C	C	C	C	C	C	C	C	C
chr1H|HvGBSv2-10756_18994559+166	G/C	1	18994725	+	NA	NA	NA	NA	NA	NA	G	G	G	G	G	G	G	G	G	G	G	G	G	G	G	G	G	G	G	G	G	G	G	G	G	G	G	G	G	G	G	G	G	S	S	G	G	G	G
chr1H|HvGBSv2-10756_18994559+169	C/T	1	18994728	+	NA	NA	NA	NA	NA	NA	Y	C	C	C	C	C	C	C	C	C	C	C	Y	C	C	Y	C	C	C	C	C	C	C	C	C	C	C	C	C	C	C	C	C	C	C	C	C	C	C
chr1H|HvGBSv2-6128_19537623+23	T/C	1	19537646	+	NA	NA	NA	NA	NA	NA	C	T	C	C	T	T	C	T	C	C	T	C	C	T	C	C	C	T	T	T	C	C	T	C	T	T	T	T	C	C	C	T	T	C	T	C	C	T	C
chr1H|HvGBSv2-6128_19537623+26	C/T	1	19537649	+	NA	NA	NA	NA	NA	NA	C	C	T	T	C	C	C	C	C	C	C	C	C	C	T	C	T	C	C	C	C	T	C	T	C	C	C	C	T	T	C	C	C	C	C	C	C	C	C
chr1H|HvGBSv2-6128_19537623+31	A/G	1	19537654	+	NA	NA	NA	NA	NA	NA	A	A	G	G	A	A	A	A	A	A	A	A	A	A	G	A	G	A	A	A	A	G	A	G	A	A	A	A	G	G	A	A	A	A	A	A	A	A	A
chr1H|HvGBSv2-6128_19537623+71	A/G	1	19537694	+	NA	NA	NA	NA	NA	NA	A	A	A	A	A	A	A	A	G	A	A	A	A	A	A	A	A	A	A	A	A	A	A	G	A	A	A	A	G	G	A	A	A	A	A	A	A	A	A
chr1H|HvGBSv2-6128_19537623+90	G/T	1	19537713	+	NA	NA	NA	NA	NA	NA	G	G	T	T	G	G	G	G	G	G	G	G	G	G	T	G	G	G	G	G	G	T	G	G	G	G	G	G	G	G	G	G	G	G	G	G	G	G	G
chr1H|HvGBSv2-6128_19537623+94	C/T	1	19537717	+	NA	NA	NA	NA	NA	NA	C	C	T	T	C	C	C	C	C	C	C	C	C	C	T	C	T	C	C	C	C	T	C	T	C	C	C	C	T	T	C	C	C	C	C	C	C	C	C
chr1H|HvGBSv2-6128_19537623+152	A/G	1	19537775	+	NA	NA	NA	NA	NA	NA	A	A	G	G	A	A	A	A	A	A	A	A	A	A	G	A	G	A	A	A	A	G	A	G	A	A	A	A	G	G	A	A	A	A	A	A	A	A	A
chr1H|HvGBSv2-6129_20024761+19	T/C	1	20024780	+	NA	NA	NA	NA	NA	NA	T	T	C	T	T	C	T	T	T	T	T	T	T	T	T	C	T	T	T	T	T	T	T	T	T	T	T	T	T	T	T	C	C	T	T	C	T	T	T
chr1H|HvGBSv2-6129_20024761+61	T/C	1	20024822	+	NA	NA	NA	NA	NA	NA	T	T	C	T	T	C	T	T	T	T	T	T	T	T	T	C	T	T	T	T	T	T	T	T	T	T	T	T	T	T	T	C	C	T	T	C	T	T	T
chr1H|HvGBSv2-6129_20024761+70	C/T	1	20024831	+	NA	NA	NA	NA	NA	NA	C	C	T	C	C	T	C	C	C	C	C	C	T	C	C	T	T	T	C	C	T	C	T	C	T	C	C	C	C	C	C	T	T	C	C	T	T	C	C
chr1H|HvGBSv2-46_20699948+55	C/A	1	20700003	+	NA	NA	NA	NA	NA	NA	C	C	C	C	C	C	C	C	A	C	C	A	C	C	C	C	A	A	C	C	A	C	A	A	A	C	C	C	A	A	C	C	C	C	A	C	A	C	C
chr1H|HvGBSv2-46_20699948+115	G/T	1	20700063	+	NA	NA	NA	NA	NA	NA	G	G	G	G	G	G	G	G	T	G	G	T	G	G	G	G	T	T	G	G	T	G	T	T	T	G	G	G	T	T	G	G	G	G	T	G	T	G	G
chr1H|HvGBSv2-46_20699948+126	A/C	1	20700074	+	NA	NA	NA	NA	NA	NA	A	A	A	A	C	A	A	A	A	A	C	A	A	C	A	A	A	A	C	C	A	A	A	A	A	A	A	A	A	A	A	A	A	A	A	A	A	A	A
chr1H|HvGBSv2-46_20699948+153	G/A	1	20700101	+	NA	NA	NA	NA	NA	NA	A	G	G	G	G	A	G	G	G	G	G	G	A	G	G	A	G	G	G	G	G	G	G	G	G	G	G	A	G	G	A	A	A	A	G	A	G	A	A
chr1H|HvGBSv2-47_21168787+14	A/G	1	21168801	+	NA	NA	NA	NA	NA	NA	A	G	A	A	R	G	G	A	A	A	A	A	A	G	A	A	A	A	G	G	A	A	A	A	A	G	G	A	A	A	A	A	A	A	A	A	A	A	A
chr1H|HvGBSv2-47_21168787+50	T/C	1	21168837	+	NA	NA	NA	NA	NA	NA	T	T	C	C	T	T	T	T	C	T	T	C	T	T	C	T	C	C	T	T	C	C	C	C	C	T	T	T	C	C	T	T	T	T	C	T	C	T	T
chr1H|HvGBSv2-47_21168787+51	A/G	1	21168838	+	NA	NA	NA	NA	NA	NA	A	A	A	A	A	A	A	A	A	A	G	A	A	A	A	G	A	A	A	A	A	A	A	A	A	A	A	A	A	A	G	G	G	A	A	G	A	A	G
chr1H|HvGBSv2-47_21168787+86	G/T	1	21168873	+	NA	NA	NA	NA	NA	NA	G	G	G	G	G	G	G	G	G	G	T	G	G	G	G	T	G	G	G	G	G	G	G	G	G	G	G	G	G	G	T	T	T	G	G	T	G	G	T
chr1H|HvGBSv2-6132_21382826+46	G/C	1	21382872	+	NA	NA	NA	NA	NA	NA	G	G	C	C	G	G	G	G	C	G	G	C	G	G	C	G	C	C	G	G	C	C	C	C	C	G	G	G	C	C	G	G	G	G	G	G	C	G	G
chr1H|HvGBSv2-6132_21382826+82	G/A	1	21382908	+	NA	NA	NA	NA	NA	NA	G	A	G	G	A	A	A	G	G	A	A	G	G	A	G	G	G	G	A	A	G	G	G	G	G	A	A	G	G	G	G	G	G	G	G	G	G	A	G
chr1H|HvGBSv2-6132_21382826+87	A/G	1	21382913	+	NA	NA	NA	NA	NA	NA	A	A	G	G	A	A	A	A	G	A	A	G	A	A	G	A	G	G	A	A	G	G	G	G	G	A	A	A	G	G	A	A	A	A	A	A	G	A	A
chr1H|HvGBSv2-6132_21382826+94	T/C	1	21382920	+	NA	NA	NA	NA	NA	NA	T	C	T	T	C	C	C	T	T	C	C	T	T	C	T	T	T	T	C	C	T	T	T	T	T	C	C	T	T	T	T	T	T	T	T	T	T	C	T
chr1H|HvGBSv2-6132_21382826+137	C/A	1	21382963	+	NA	NA	NA	NA	NA	NA	C	A	C	C	A	A	A	C	C	A	A	C	C	A	C	C	C	C	A	A	C	C	C	C	C	A	A	C	C	C	C	C	C	C	C	C	C	A	C
chr1H|HvGBSv2-6133_21826663+88	A/G	1	21826751	+	NA	NA	NA	NA	NA	NA	A	G	A	A	G	G	G	A	A	G	G	A	A	G	A	A	A	A	G	G	A	A	A	A	A	G	G	A	A	A	A	A	G	R	A	A	A	R	A
chr1H|HvGBSv2-6133_21826663+98	G/A	1	21826761	+	NA	NA	NA	NA	NA	NA	G	A	G	G	A	A	A	G	G	A	A	G	G	A	G	G	G	G	A	A	G	G	G	G	G	A	A	G	G	G	G	G	A	R	G	G	G	R	G
chr1H|HvGBSv2-6133_21826663+158	T/G	1	21826821	+	NA	NA	NA	NA	NA	NA	T	T	T	T	T	T	T	T	T	T	T	T	T	T	T	T	T	T	T	T	T	T	T	T	T	T	T	T	T	T	T	T	T	T	T	T	T	T	T
chr1H|HvGBSv2-50_22567758+26	C/T	1	22567784	+	NA	NA	NA	NA	NA	NA	T	C	T	T	C	C	T	C	T	C	C	C	T	C	T	C	C	C	C	C	C	T	C	T	T	C	C	C	T	C	T	C	C	T	T	T	T	T	T
chr1H|HvGBSv2-50_22567758+50	A/T	1	22567808	+	NA	NA	NA	NA	NA	NA	T	A	T	T	A	A	T	A	T	A	A	A	T	A	T	A	A	A	A	A	A	T	A	T	T	A	A	A	T	A	T	A	A	T	T	T	T	T	T
chr1H|HvGBSv2-50_22567758+109	C/G	1	22567867	+	NA	NA	NA	NA	NA	NA	G	C	C	C	C	C	C	C	G	C	C	C	G	C	C	C	C	C	C	C	C	C	C	G	C	C	C	C	C	C	G	C	C	G	G	G	C	C	C
chr1H|HvGBSv2-6135_22796950+93	C/A	1	22797043	+	NA	NA	NA	NA	NA	NA	A	C	A	A	C	C	C	C	A	C	C	C	A	C	A	C	C	C	C	C	C	A	C	A	C	C	C	C	A	C	A	C	C	A	C	C	A	A	A
chr1H|HvGBSv2-6135_22796950+124	G/T	1	22797074	+	NA	NA	NA	NA	NA	NA	T	G	T	T	G	G	G	G	T	G	G	G	T	G	T	G	G	G	G	G	G	T	G	T	G	G	G	G	G	G	T	G	G	T	G	G	G	K	K
chr1H|HvGBSv2-51_22954343+6	C/T	1	22954349	+	NA	NA	NA	NA	NA	NA	C	C	C	C	C	C	C	C	C	C	C	C	C	C	C	C	C	C	C	C	C	C	C	C	C	C	C	C	C	C	C	C	C	C	C	C	C	T	T
chr1H|HvGBSv2-51_22954343+8	T/C	1	22954351	+	NA	NA	NA	NA	NA	NA	T	T	T	T	T	T	T	T	T	T	T	T	T	T	T	T	T	T	T	T	T	T	T	T	T	T	T	T	C	T	T	T	T	T	T	T	T	T	T
chr1H|HvGBSv2-51_22954343+82	C/T	1	22954425	+	NA	NA	NA	NA	NA	NA	C	C	T	T	C	C	C	C	C	C	C	C	C	C	T	C	C	C	C	C	C	T	C	C	C	C	C	C	C	C	C	C	C	C	C	C	C	C	C
chr1H|HvGBSv2-51_22954343+105	A/G	1	22954448	+	NA	NA	NA	NA	NA	NA	G	A	A	A	A	A	A	A	G	A	A	A	G	A	A	A	A	A	A	A	A	A	A	G	A	A	A	A	A	A	A	A	A	A	A	A	A	A	A
chr1H|HvGBSv2-51_22954343+106	T/C	1	22954449	+	NA	NA	NA	NA	NA	NA	C	T	T	T	T	T	T	T	C	T	T	T	C	T	T	T	T	T	T	T	T	T	T	C	T	T	T	T	T	T	T	T	T	T	T	T	T	T	T
chr1H|HvGBSv2-6136_23179224+49	G/A	1	23179273	+	NA	NA	NA	NA	NA	NA	G	G	A	A	G	G	G	G	G	G	G	G	G	G	A	G	G	G	G	G	G	A	G	G	G	G	G	G	G	G	G	G	G	G	G	G	G	G	G
chr1H|HvGBSv2-6136_23179224+57	T/C	1	23179281	+	NA	NA	NA	NA	NA	NA	C	T	T	T	T	T	T	T	C	T	T	T	C	T	T	T	T	T	T	T	T	T	T	C	T	T	T	T	T	T	T	T	T	C	T	T	T	T	T
chr1H|HvGBSv2-6136_23179224+70	G/C	1	23179294	+	NA	NA	NA	NA	NA	NA	C	G	C	C	G	G	G	G	C	G	G	G	C	G	C	G	G	G	G	G	G	C	G	C	G	G	G	G	G	G	G	G	G	C	G	G	C	C	C
chr1H|HvGBSv2-6136_23179224+78	A/G	1	23179302	+	NA	NA	NA	NA	NA	NA	A	A	A	A	A	A	A	A	A	A	A	A	A	A	A	A	A	A	A	A	A	A	A	A	A	A	A	A	A	A	A	A	A	A	A	A	G	G	G
chr1H|HvGBSv2-6136_23179224+94	C/T	1	23179318	+	NA	NA	NA	NA	NA	NA	T	C	T	T	C	C	C	C	T	C	C	C	T	C	T	C	C	C	C	C	C	T	C	T	C	C	C	C	T	C	C	C	C	T	C	C	T	T	T
chr1H|HvGBSv2-6136_23179224+103	T/G	1	23179327	+	NA	NA	NA	NA	NA	NA	G	T	G	G	T	T	T	T	G	T	T	T	G	T	T	T	T	T	T	T	T	G	T	G	T	T	T	T	T	T	T	T	T	G	T	T	T	T	T
chr1H|HvGBSv2-6136_23179224+144	G/C	1	23179368	+	NA	NA	NA	NA	NA	NA	G	G	C	C	G	G	G	G	G	G	G	G	G	G	C	G	G	G	G	G	G	C	G	G	G	G	G	G	G	G	G	G	G	G	G	G	G	G	G
chr1H|HvGBSv2-6136_23179224+147	G/C	1	23179371	+	NA	NA	NA	NA	NA	NA	G	G	G	G	G	G	G	G	G	G	G	G	G	G	G	G	G	G	G	G	G	G	G	G	G	G	G	G	C	G	G	G	G	G	G	G	G	G	G
chr1H|HvGBSv2-6136_23179224+148	T/C	1	23179372	+	NA	NA	NA	NA	NA	NA	T	T	T	T	T	T	T	T	T	T	T	T	T	T	T	T	T	T	T	T	T	T	T	T	T	T	T	T	C	T	T	T	T	T	T	T	T	T	T
chr1H|HvGBSv2-6136_23179224+155	G/A	1	23179379	+	NA	NA	NA	NA	NA	NA	G	G	G	G	G	G	G	G	G	G	G	G	G	G	G	G	G	G	G	G	G	G	G	G	G	G	G	G	G	G	G	G	G	G	G	G	A	A	A
chr1H|HvGBSv2-52_23411278+42	G/A	1	23411320	+	NA	NA	NA	NA	NA	NA	G	A	A	A	G	G	G	G	G	G	G	G	G	G	A	G	G	G	G	G	G	A	G	G	G	G	G	G	G	G	A	G	G	G	G	G	A	A	G
chr1H|HvGBSv2-52_23411278+67	A/G	1	23411345	+	NA	NA	NA	NA	NA	NA	A	A	A	A	A	A	A	A	G	A	A	A	A	A	A	A	A	A	A	A	A	A	A	G	A	A	A	A	A	A	A	A	A	A	A	A	A	A	A
chr1H|HvGBSv2-52_23411278+104	T/C	1	23411382	+	NA	NA	NA	NA	NA	NA	T	T	C	C	T	T	T	T	T	T	T	T	T	T	C	T	T	T	T	T	T	C	T	T	T	T	T	T	T	T	T	T	T	T	T	T	T	C	T
chr1H|HvGBSv2-6137_23598782+8	C/T	1	23598790	+	NA	NA	NA	NA	NA	NA	C	Y	C	C	C	C	C	C	C	C	C	C	C	C	C	C	C	C	C	C	C	C	C	C	C	C	C	C	C	C	Y	C	C	C	C	C	C	C	C
chr1H|HvGBSv2-6137_23598782+118	G/T	1	23598900	+	NA	NA	NA	NA	NA	NA	G	G	G	G	G	G	G	G	G	G	G	G	G	G	G	G	G	G	G	G	G	G	G	G	G	G	G	G	G	G	G	G	G	G	G	G	K	G	G
chr1H|HvGBSv2-6138_24084702+45	T/G	1	24084747	+	NA	NA	NA	NA	NA	NA	T	T	T	T	T	T	T	T	T	T	T	T	T	T	T	T	T	T	T	T	T	T	T	T	T	T	T	T	T	T	T	T	T	T	T	G	T	T	T
chr1H|HvGBSv2-54_24312874+4	T/A	1	24312878	+	NA	NA	NA	NA	NA	NA	T	T	T	T	T	T	T	T	T	T	T	A	T	T	T	T	A	A	T	T	A	T	A	T	T	T	T	T	T	A	T	T	T	T	A	T	T	T	T
chr1H|HvGBSv2-54_24312874+21	C/G	1	24312895	+	NA	NA	NA	NA	NA	NA	C	C	G	G	C	C	C	C	C	C	C	C	G	C	G	C	C	C	C	C	C	C	C	C	G	C	C	C	G	C	G	G	G	G	C	C	G	G	C
chr1H|HvGBSv2-54_24312874+46	A/G	1	24312920	+	NA	NA	NA	NA	NA	NA	A	A	G	G	A	A	A	A	A	A	A	A	G	A	G	A	A	A	A	A	A	A	A	A	G	A	A	A	G	A	G	G	G	G	A	A	G	G	A
chr1H|HvGBSv2-54_24312874+49	T/G	1	24312923	+	NA	NA	NA	NA	NA	NA	T	T	T	T	T	T	T	T	T	T	T	T	T	T	T	T	T	T	T	T	T	T	T	T	G	T	T	T	G	T	T	T	T	G	T	T	G	T	T
chr1H|HvGBSv2-54_24312874+64	C/T	1	24312938	+	NA	NA	NA	NA	NA	NA	C	C	T	T	C	C	C	C	C	C	C	C	T	C	T	C	C	C	C	C	C	C	C	C	T	C	C	C	T	C	T	T	T	T	C	C	T	T	C
chr1H|HvGBSv2-54_24312874+70	A/C	1	24312944	+	NA	NA	NA	NA	NA	NA	A	A	A	A	A	A	A	A	C	A	A	A	A	A	A	A	A	A	A	A	A	A	A	C	A	A	A	A	A	A	A	A	A	A	A	A	A	A	A
chr1H|HvGBSv2-54_24312874+74	G/C	1	24312948	+	NA	NA	NA	NA	NA	NA	G	G	C	C	G	G	G	G	G	G	G	G	C	G	C	G	G	G	G	G	G	G	G	G	C	G	G	G	C	G	C	C	C	C	G	G	C	C	G
chr1H|HvGBSv2-54_24312874+117	T/A	1	24312991	+	NA	NA	NA	NA	NA	NA	T	T	A	A	T	T	T	T	T	T	T	T	A	T	A	T	T	T	T	T	T	T	T	T	A	T	T	T	A	T	A	A	A	A	T	T	A	A	T
chr1H|HvGBSv2-54_24312874+124	G/T	1	24312998	+	NA	NA	NA	NA	NA	NA	G	G	T	T	G	G	G	G	G	G	G	G	T	G	T	G	G	G	G	G	G	G	G	G	T	G	G	G	T	G	T	T	T	T	G	G	T	T	G
chr1H|HvGBSv2-54_24312874+159	C/T	1	24313033	+	NA	NA	NA	NA	NA	NA	C	C	T	T	C	C	C	C	C	C	C	C	T	C	T	C	C	C	C	C	C	C	C	C	T	C	C	C	T	C	T	T	T	T	C	C	T	T	C
chr1H|HvGBSv2-6139_24527094+105	A/C	1	24527199	+	NA	NA	NA	NA	NA	NA	A	A	A	A	A	A	A	A	A	A	A	A	A	A	A	A	A	A	A	A	A	A	A	A	A	A	A	A	A	A	A	A	A	M	A	A	A	A	A
chr1H|HvGBSv2-6139_24527094+107	T/C	1	24527201	+	NA	NA	NA	NA	NA	NA	T	T	T	T	T	T	T	T	T	T	T	T	T	T	T	T	T	T	T	T	T	T	T	T	T	T	T	T	T	T	T	T	T	Y	T	T	T	T	T
chr1H|HvGBSv2-6139_24527094+138	G/T	1	24527232	+	NA	NA	NA	NA	NA	NA	G	G	G	G	G	G	G	G	G	G	G	G	G	G	G	G	G	G	G	G	G	G	G	G	G	G	G	G	G	G	G	G	G	G	G	G	G	G	G
chr1H|HvGBSv2-6139_24527094+158	C/T	1	24527252	+	NA	NA	NA	NA	NA	NA	C	C	C	C	C	C	C	C	C	C	C	C	C	C	C	C	C	C	C	C	C	C	C	C	C	C	C	C	T	C	C	C	C	C	C	C	C	C	C
chr1H|HvGBSv2-6140_24928127+20	G/A	1	24928147	+	NA	NA	NA	NA	NA	NA	G	G	G	G	G	G	G	G	G	G	G	G	A	G	G	G	G	G	G	G	G	G	G	G	A	G	G	G	G	G	A	A	A	A	G	A	G	G	G
chr1H|HvGBSv2-6140_24928127+51	T/A	1	24928178	+	NA	NA	NA	NA	NA	NA	T	T	T	T	T	T	T	T	T	T	T	T	A	T	T	T	T	T	T	T	T	T	T	T	A	T	T	T	T	T	A	A	A	A	T	A	T	T	T
chr1H|HvGBSv2-6140_24928127+69	G/A	1	24928196	+	NA	NA	NA	NA	NA	NA	G	G	A	A	G	G	G	G	G	G	G	G	A	G	A	G	G	G	G	G	G	G	G	G	A	G	G	G	A	G	A	A	G	A	G	A	A	G	G
chr1H|HvGBSv2-6140_24928127+105	A/G	1	24928232	+	NA	NA	NA	NA	NA	NA	A	A	A	A	A	A	G	A	A	A	G	A	A	A	A	A	A	A	A	A	A	A	A	A	A	A	A	A	A	A	A	A	A	A	A	A	A	A	A
chr1H|HvGBSv2-6140_24928127+140	C/T	1	24928267	+	NA	NA	NA	NA	NA	NA	C	C	C	C	C	C	C	C	C	C	C	C	C	C	C	C	C	C	C	C	C	C	C	C	C	C	C	C	C	C	C	C	C	C	C	C	C	C	C
chr1H|HvGBSv2-56_25227630+64	T/C	1	25227694	+	NA	NA	NA	NA	NA	NA	T	T	C	C	T	T	T	T	T	T	T	T	T	T	C	T	T	T	T	T	T	T	T	T	T	T	T	T	T	T	T	T	T	T	T	T	T	T	T
chr1H|HvGBSv2-56_25227630+65	G/A	1	25227695	+	NA	NA	NA	NA	NA	NA	G	G	A	A	G	G	A	G	G	G	A	G	A	G	A	G	G	G	G	G	G	G	G	G	A	G	G	G	A	G	A	A	A	A	G	A	A	G	G
chr1H|HvGBSv2-56_25227630+103	T/C	1	25227733	+	NA	NA	NA	NA	NA	NA	T	T	C	C	T	T	T	T	T	T	T	T	T	T	C	T	T	T	T	T	T	T	T	T	T	T	T	T	T	T	T	T	T	T	T	T	T	T	T
chr1H|HvGBSv2-6141_25428175+98	A/G	1	25428273	+	NA	NA	NA	NA	NA	NA	A	A	A	A	A	A	A	A	G	A	A	G	A	A	A	A	G	G	A	A	G	A	G	G	A	A	A	A	A	G	A	A	A	A	G	A	A	A	A
chr1H|HvGBSv2-6141_25428175+126	T/C	1	25428301	+	NA	NA	NA	NA	NA	NA	T	T	T	T	T	T	T	T	T	Y	T	T	T	T	T	T	T	T	T	T	T	T	T	T	C	T	T	T	C	T	C	T	T	C	T	T	C	T	T
chr1H|HvGBSv2-6141_25428175+142	G/A	1	25428317	+	NA	NA	NA	NA	NA	NA	G	G	G	G	G	G	G	G	G	R	G	G	G	G	G	G	G	G	G	G	G	G	G	G	A	G	G	G	A	G	A	G	G	A	G	G	A	G	G
chr1H|HvGBSv2-57_25596413+73	A/G	1	25596486	+	NA	NA	NA	NA	NA	NA	A	A	A	A	A	A	A	A	A	A	A	A	G	A	G	A	A	A	A	A	A	A	A	A	G	A	A	A	G	A	G	A	A	G	A	G	G	A	A
chr1H|HvGBSv2-6143_26707880+4	C/T	1	26707884	+	NA	NA	NA	NA	NA	NA	C	C	Y	C	C	C	C	C	C	C	C	C	C	C	Y	C	C	C	C	C	C	C	C	C	C	C	C	C	C	C	C	C	C	C	C	C	C	C	C
chr1H|HvGBSv2-6143_26707880+61	A/G	1	26707941	+	NA	NA	NA	NA	NA	NA	A	A	A	A	A	A	A	A	A	A	A	A	A	A	A	A	A	A	A	A	A	A	A	A	G	A	R	A	A	A	A	A	A	A	A	A	A	A	A
chr1H|HvGBSv2-6143_26707880+143	T/C	1	26708023	+	NA	NA	NA	NA	NA	NA	T	T	T	T	T	T	T	T	T	T	T	T	Y	T	T	Y	T	T	T	T	T	T	T	T	T	T	T	T	T	T	T	T	T	T	T	Y	T	T	Y
chr1H|HvGBSv2-60_27057067+140	T/C	1	27057207	+	NA	NA	NA	NA	NA	NA	T	T	T	T	T	T	T	T	T	T	T	T	T	T	T	T	T	T	T	T	T	T	T	T	Y	T	T	T	Y	T	C	T	T	C	T	T	Y	T	T
chr1H|HvGBSv2-60_27057067+158	C/G	1	27057225	+	NA	NA	NA	NA	NA	NA	C	C	C	C	C	C	C	C	C	C	C	C	C	C	C	C	C	C	C	C	C	C	C	C	S	C	C	C	S	C	G	C	C	G	C	C	S	C	C
chr1H|HvGBSv2-61_27450317+38	T/C	1	27450355	+	NA	NA	NA	NA	NA	NA	T	T	T	T	T	T	T	T	T	T	T	T	C	T	T	T	T	T	T	T	T	T	T	T	T	T	T	T	T	T	T	T	T	T	T	C	T	T	T
chr1H|HvGBSv2-61_27450317+119	C/T	1	27450436	+	NA	NA	NA	NA	NA	NA	C	C	C	C	C	C	C	C	C	C	C	C	C	C	C	C	C	C	C	C	C	C	C	C	T	C	C	C	T	C	T	C	C	T	C	C	C	C	C
chr1H|HvGBSv2-61_27450317+120	A/C	1	27450437	+	NA	NA	NA	NA	NA	NA	A	A	A	A	A	A	A	A	A	A	A	A	A	A	A	A	A	A	A	A	A	A	A	A	C	A	A	A	C	A	C	A	A	C	A	A	A	A	A
chr1H|HvGBSv2-61_27450317+121	G/C	1	27450438	+	NA	NA	NA	NA	NA	NA	G	G	G	G	G	G	G	G	G	G	G	G	G	G	G	G	G	G	G	G	G	G	G	G	C	G	G	G	C	G	C	G	G	C	G	G	G	G	G
chr1H|HvGBSv2-6144_27684510+30	G/A	1	27684540	+	NA	NA	NA	NA	NA	NA	G	G	G	G	G	G	G	G	G	G	G	G	A	G	G	G	G	G	G	G	G	G	G	G	G	G	G	G	G	G	A	G	G	G	G	A	G	G	G
chr1H|HvGBSv2-6144_27684510+101	C/T	1	27684611	+	NA	NA	NA	NA	NA	NA	C	C	T	T	T	C	C	T	C	T	C	C	T	C	T	C	C	C	T	T	C	C	C	C	T	C	C	C	C	C	T	C	C	T	C	T	T	C	C
chr1H|HvGBSv2-6144_27684510+113	A/G	1	27684623	+	NA	NA	NA	NA	NA	NA	A	A	G	G	A	A	A	A	A	A	A	A	A	A	G	A	A	A	A	A	A	A	A	A	A	A	A	A	A	A	A	A	A	A	A	A	A	A	A
chr1H|HvGBSv2-6144_27684510+136	C/T	1	27684646	+	NA	NA	NA	NA	NA	NA	T	C	C	C	T	C	C	T	C	T	C	C	C	C	C	C	C	C	T	T	C	C	C	C	T	C	C	C	C	C	C	C	C	T	C	C	T	C	C
chr1H|HvGBSv2-65_29239362+60	C/A	1	29239422	+	NA	NA	NA	NA	NA	NA	C	C	C	C	C	C	C	C	C	C	C	C	C	C	C	C	C	C	C	C	C	C	C	C	A	C	C	C	C	C	C	C	C	A	C	C	C	C	C
chr1H|HvGBSv2-65_29239362+72	A/G	1	29239434	+	NA	NA	NA	NA	NA	NA	A	A	A	A	A	A	A	A	A	A	A	A	A	A	A	A	A	A	A	A	A	A	A	A	G	A	A	A	A	A	A	A	A	G	A	A	A	A	A
chr1H|HvGBSv2-65_29239362+89	G/C	1	29239451	+	NA	NA	NA	NA	NA	NA	G	C	G	G	G	C	C	G	C	C	C	C	G	C	G	G	G	G	G	C	G	G	G	C	G	C	C	G	G	C	G	G	G	G	C	G	G	G	G
chr1H|HvGBSv2-6124_29398090+21	G/A	1	29398111	+	NA	NA	NA	NA	NA	NA	G	G	G	G	G	G	G	G	G	G	G	G	G	G	G	G	G	G	G	G	G	G	G	G	G	G	G	G	G	G	G	G	G	G	G	G	G	G	G
chr1H|HvGBSv2-66_29608572+31	C/T	1	29608603	+	NA	NA	NA	NA	NA	NA	C	C	C	C	C	C	C	C	C	C	C	C	C	C	C	C	C	C	C	C	C	C	C	C	C	C	C	C	C	C	C	C	C	C	C	C	C	C	C
chr1H|HvGBSv2-66_29608572+86	T/C	1	29608658	+	NA	NA	NA	NA	NA	NA	C	T	T	C	C	T	T	C	T	T	T	T	T	T	C	C	C	C	Y	T	C	Y	C	T	T	T	T	Y	T	T	C	C	C	T	T	Y	C	Y	C
chr1H|HvGBSv2-66_29608572+89	T/C	1	29608661	+	NA	NA	NA	NA	NA	NA	C	T	T	C	C	T	T	C	T	T	T	T	T	T	C	C	C	C	Y	T	C	Y	C	T	T	T	T	Y	T	T	C	C	C	T	T	Y	C	Y	C
chr1H|HvGBSv2-66_29608572+103	A/T	1	29608675	+	NA	NA	NA	NA	NA	NA	A	A	A	A	A	A	A	A	A	A	A	A	A	A	A	A	A	A	A	A	A	A	A	A	A	A	A	A	A	A	A	A	A	A	A	A	A	A	A
chr1H|HvGBSv2-66_29608572+165	A/C	1	29608737	+	NA	NA	NA	NA	NA	NA	A	A	A	A	A	A	A	A	A	A	A	A	A	A	A	A	A	A	A	A	A	A	A	A	A	A	A	A	A	A	A	A	A	A	A	A	A	A	A
chr1H|HvGBSv2-6148_29611326+28	C/A	1	29611354	+	NA	NA	NA	NA	NA	NA	C	C	C	C	C	C	C	C	C	C	C	C	C	C	C	C	C	C	C	C	C	C	C	C	C	C	C	C	C	C	C	C	C	C	C	C	C	C	C
chr1H|HvGBSv2-6148_29611326+31	C/A	1	29611357	+	NA	NA	NA	NA	NA	NA	C	C	C	C	C	C	C	C	C	C	C	C	C	C	C	C	C	C	C	C	C	C	C	C	C	C	C	C	C	C	C	C	C	C	C	C	C	C	C
chr1H|HvGBSv2-6148_29611326+34	C/G	1	29611360	+	NA	NA	NA	NA	NA	NA	C	G	C	C	C	G	G	C	G	G	G	G	C	G	C	C	C	C	C	G	C	C	C	G	C	G	G	C	C	G	C	C	C	C	G	C	C	C	C
chr1H|HvGBSv2-66_29612374+22	A/C	1	29612396	+	NA	NA	NA	NA	NA	NA	A	A	A	A	A	A	A	A	A	A	A	A	A	A	A	A	A	A	A	A	A	A	A	A	A	A	A	A	A	A	A	A	A	A	A	A	A	A	A
chr1H|HvGBSv2-66_29612374+92	T/C	1	29612466	+	NA	NA	NA	NA	NA	NA	C	T	C	C	C	T	T	C	T	T	T	T	T	T	C	C	C	C	C	T	C	C	C	T	T	T	T	C	C	T	C	C	C	T	T	C	C	C	C
chr1H|HvGBSv2-6149_29914779+51	C/A	1	29914830	+	NA	NA	NA	NA	NA	NA	C	C	C	C	C	C	C	C	C	C	C	C	C	C	C	C	C	C	C	C	C	C	C	C	A	C	C	C	C	C	C	C	C	A	C	C	C	C	C
chr1H|HvGBSv2-6149_29914779+63	A/G	1	29914842	+	NA	NA	NA	NA	NA	NA	G	A	G	G	G	A	A	G	A	A	A	A	A	A	G	G	G	G	G	A	G	G	G	A	A	A	A	G	G	A	G	G	G	A	A	G	G	G	G
chr1H|HvGBSv2-6149_29914779+69	C/T	1	29914848	+	NA	NA	NA	NA	NA	NA	C	C	C	C	C	C	C	C	C	C	C	C	C	C	C	C	C	C	C	C	C	C	C	C	T	C	C	C	C	C	C	C	C	T	C	C	C	C	C
chr1H|HvGBSv2-6149_29914779+90	T/A	1	29914869	+	NA	NA	NA	NA	NA	NA	T	T	T	T	T	T	T	T	T	T	T	T	T	T	T	T	T	T	T	T	T	T	T	T	A	T	T	T	T	T	T	T	T	A	T	T	T	T	T
chr1H|HvGBSv2-6149_29914779+133	A/G	1	29914912	+	NA	NA	NA	NA	NA	NA	A	G	A	A	A	G	G	A	G	G	G	G	A	G	A	A	A	A	A	G	A	A	A	G	A	G	G	A	A	G	A	A	A	A	G	A	A	A	A
chr1H|HvGBSv2-6149_29914779+144	A/G	1	29914923	+	NA	NA	NA	NA	NA	NA	A	A	A	A	A	A	A	A	A	A	A	A	A	A	A	A	A	A	A	A	A	A	A	A	G	A	A	A	A	A	A	A	A	G	A	A	A	A	A
chr1H|HvGBSv2-6149_29914779+149	C/T	1	29914928	+	NA	NA	NA	NA	NA	NA	C	C	C	C	C	C	C	C	C	C	C	C	C	C	C	C	C	C	C	C	C	C	C	C	T	C	C	C	C	C	C	C	C	T	C	C	C	C	C
chr1H|HvGBSv2-6149_29914779+160	T/G	1	29914939	+	NA	NA	NA	NA	NA	NA	T	T	T	T	T	T	T	T	T	T	T	T	T	T	T	T	T	T	T	T	T	T	T	T	G	T	T	T	T	T	T	T	T	G	T	T	T	T	T
chr1H|HvGBSv2-67_30181273+37	G/A	1	30181310	+	NA	NA	NA	NA	NA	NA	G	G	G	G	G	G	G	G	G	G	G	G	G	G	G	G	G	G	G	G	G	G	G	G	A	G	G	G	G	G	G	G	G	A	G	G	G	G	G
chr1H|HvGBSv2-67_30181273+48	C/G	1	30181321	+	NA	NA	NA	NA	NA	NA	C	C	C	C	C	C	C	C	G	C	C	G	C	C	C	C	C	C	C	C	C	C	C	G	C	C	C	C	C	G	C	C	C	C	G	C	C	C	C
chr1H|HvGBSv2-67_30181273+77	C/T	1	30181350	+	NA	NA	NA	NA	NA	NA	C	C	C	C	C	C	C	C	C	C	C	C	C	C	C	C	C	C	C	C	C	C	C	C	T	C	C	C	C	C	C	C	C	T	C	C	C	C	C
chr1H|HvGBSv2-67_30181273+144	G/A	1	30181417	+	NA	NA	NA	NA	NA	NA	G	G	G	G	G	G	G	G	G	G	G	G	G	G	G	G	G	G	G	G	G	G	G	G	A	G	G	G	G	G	G	G	G	A	G	G	G	G	G
chr1H|HvGBSv2-67_30181273+147	G/A	1	30181420	+	NA	NA	NA	NA	NA	NA	G	G	G	G	G	G	G	G	G	G	G	G	G	G	G	G	G	G	G	G	G	G	G	G	A	G	G	G	G	G	G	G	G	A	G	G	G	G	G
chr1H|HvGBSv2-6150_30375686+17	A/G	1	30375703	+	NA	NA	NA	NA	NA	NA	A	A	A	A	A	A	A	A	A	A	A	A	A	A	A	A	A	A	A	A	A	A	A	A	G	A	A	A	A	A	A	A	A	G	A	A	A	A	A
chr1H|HvGBSv2-6150_30375686+63	A/G	1	30375749	+	NA	NA	NA	NA	NA	NA	G	A	G	G	A	A	A	A	A	A	A	A	A	A	G	G	A	A	A	A	A	G	A	A	A	A	A	G	G	A	G	G	G	A	A	G	G	G	G
chr1H|HvGBSv2-6150_30375686+110	T/C	1	30375796	+	NA	NA	NA	NA	NA	NA	C	T	C	C	T	T	T	T	T	T	T	T	C	T	C	C	T	T	T	T	T	C	T	T	T	T	T	C	C	T	C	C	C	T	T	C	C	C	C
chr1H|HvGBSv2-11827_30586402+54	G/C	1	30586456	+	NA	NA	NA	NA	NA	NA	C	G	C	C	G	G	G	G	G	G	G	G	C	G	C	C	G	G	G	G	G	C	G	G	G	G	G	C	C	G	C	C	C	G	G	C	C	C	C
chr1H|HvGBSv2-11827_30586402+73	T/C	1	30586475	+	NA	NA	NA	NA	NA	NA	T	T	T	T	T	T	T	T	T	T	T	T	T	T	T	T	T	T	T	T	T	T	T	T	T	T	T	T	T	T	T	T	T	C	T	T	T	T	T
chr1H|HvGBSv2-11827_30586402+128	C/A	1	30586530	+	NA	NA	NA	NA	NA	NA	A	C	A	A	C	C	C	C	C	C	C	C	A	C	A	A	C	C	C	C	C	A	C	C	C	C	C	A	A	C	A	A	A	A	C	A	A	A	A
chr1H|HvGBSv2-11827_30586402+131	G/T	1	30586533	+	NA	NA	NA	NA	NA	NA	T	G	T	T	G	G	G	G	G	G	G	G	T	G	T	T	G	G	G	G	G	T	G	G	G	G	G	T	T	G	T	T	T	T	G	T	T	T	T
chr1H|HvGBSv2-11827_30586402+133	T/C	1	30586535	+	NA	NA	NA	NA	NA	NA	T	T	T	T	T	T	T	T	T	T	T	T	T	T	T	T	T	T	T	T	T	T	T	T	T	T	T	T	T	T	T	T	T	T	T	T	T	T	T
chr1H|HvGBSv2-11827_30586402+162	C/G	1	30586564	+	NA	NA	NA	NA	NA	NA	G	C	G	G	C	C	C	C	C	C	C	C	G	C	G	G	C	C	C	C	C	G	C	C	C	C	C	G	G	C	G	G	G	C	C	G	G	G	G
chr1H|HvGBSv2-68_30597129+16	T/C	1	30597145	+	NA	NA	NA	NA	NA	NA	T	T	T	T	T	T	T	T	T	T	T	T	T	T	T	T	T	T	T	T	T	T	T	T	T	T	T	T	T	T	T	T	T	T	T	T	T	T	T
chr1H|HvGBSv2-68_30597129+68	T/G	1	30597197	+	NA	NA	NA	NA	NA	NA	G	T	G	G	T	T	T	T	T	T	T	T	G	T	G	G	T	T	T	T	T	G	T	T	T	T	T	G	G	T	G	G	G	T	T	G	G	G	G
chr1H|HvGBSv2-68_30597129+121	T/C	1	30597250	+	NA	NA	NA	NA	NA	NA	T	T	T	T	T	T	T	T	T	T	T	T	T	T	T	T	T	T	T	T	T	T	T	T	T	T	T	T	T	T	T	T	T	T	T	T	T	T	T
chr1H|HvGBSv2-68_30597129+144	A/G	1	30597273	+	NA	NA	NA	NA	NA	NA	A	A	A	A	A	A	A	A	A	A	A	A	A	A	A	A	A	A	A	A	A	A	A	A	A	A	A	A	A	A	A	A	A	A	A	A	A	A	A
chr1H|HvGBSv2-6152_31216201+39	A/G	1	31216240	+	NA	NA	NA	NA	NA	NA	A	A	A	A	A	A	A	A	G	A	A	G	A	A	A	A	G	A	A	A	A	A	A	G	A	A	A	A	A	G	A	A	A	A	G	A	A	A	A
chr1H|HvGBSv2-6152_31216201+47	A/G	1	31216248	+	NA	NA	NA	NA	NA	NA	A	A	A	A	A	A	A	A	A	A	A	A	A	A	A	A	A	A	A	A	A	A	A	A	A	A	A	A	A	A	A	A	A	A	A	A	A	A	A
chr1H|HvGBSv2-70_31504387+55	C/A	1	31504442	+	NA	NA	NA	NA	NA	NA	C	C	C	A	C	C	C	C	C	C	C	C	C	C	C	C	C	C	C	C	C	A	C	C	C	C	C	C	C	C	C	C	C	C	C	C	C	C	C
chr1H|HvGBSv2-70_31504387+68	A/G	1	31504455	+	NA	NA	NA	NA	NA	NA	A	A	A	A	A	A	A	A	A	G	A	A	A	G	A	A	A	A	A	G	A	A	A	A	A	A	A	A	A	A	A	A	A	A	A	A	A	A	A
chr1H|HvGBSv2-70_31504387+69	G/A	1	31504456	+	NA	NA	NA	NA	NA	NA	G	G	G	G	G	G	G	G	G	G	G	G	G	G	G	G	G	G	G	G	G	G	G	G	G	G	G	G	A	G	G	A	A	G	G	A	G	A	G
chr1H|HvGBSv2-70_31504387+82	A/G	1	31504469	+	NA	NA	NA	NA	NA	NA	A	A	A	A	A	A	A	A	A	G	A	A	A	A	A	A	A	A	A	G	A	A	A	A	A	A	A	A	G	A	A	A	G	A	A	G	A	G	A
chr1H|HvGBSv2-70_31504387+123	T/A	1	31504510	+	NA	NA	NA	NA	NA	NA	T	T	T	T	T	T	T	T	T	T	T	T	T	T	T	T	T	T	T	T	T	T	T	T	T	T	T	T	A	T	T	A	A	T	T	A	T	A	T
chr1H|HvGBSv2-70_31504387+135	G/A	1	31504522	+	NA	NA	NA	NA	NA	NA	G	G	G	G	G	G	G	G	G	A	G	G	G	G	G	G	G	G	G	A	G	G	G	G	G	G	G	G	A	G	G	G	A	G	G	A	G	A	G
chr1H|HvGBSv2-70_31504387+159	A/G	1	31504546	+	NA	NA	NA	NA	NA	NA	A	A	A	A	A	A	A	A	A	G	A	A	A	G	A	A	A	A	A	G	A	A	A	A	A	A	A	A	A	A	A	A	A	A	A	A	A	A	A
chr1H|HvGBSv2-6153_31685434+29	C/G	1	31685463	+	NA	NA	NA	NA	NA	NA	C	G	C	C	C	C	G	C	G	G	C	G	C	G	C	C	G	C	C	C	C	C	C	G	G	C	C	C	C	G	C	C	C	G	G	C	C	C	C
chr1H|HvGBSv2-71_31957105+105	A/G	1	31957210	+	NA	NA	NA	NA	NA	NA	A	A	A	A	G	A	G	A	A	G	A	G	A	A	G	A	G	A	G	G	A	A	A	A	G	A	A	G	A	G	A	G	G	G	G	A	A	A	A
chr1H|HvGBSv2-71_31957105+155	T/C	1	31957260	+	NA	NA	NA	NA	NA	NA	T	T	T	T	C	T	C	T	T	C	T	C	T	T	C	T	C	T	C	C	T	T	T	T	C	T	T	C	T	C	T	C	C	C	C	T	T	T	T
chr1H|HvGBSv2-6154_32177966+93	G/A	1	32178059	+	NA	NA	NA	NA	NA	NA	G	G	A	A	A	G	A	G	G	A	G	A	G	G	A	A	A	G	A	A	G	A	G	G	G	G	G	G	G	A	G	A	A	G	A	A	A	A	G
chr1H|HvGBSv2-6154_32177966+159	T/C	1	32178125	+	NA	NA	NA	NA	NA	NA	T	T	Y	Y	T	T	T	T	T	T	T	T	T	T	T	T	T	T	T	T	T	Y	T	T	T	T	T	T	T	T	T	T	T	T	T	T	T	Y	T
chr1H|HvGBSv2-6155_32611096+11	G/C	1	32611107	+	NA	NA	NA	NA	NA	NA	C	C	G	G	G	C	G	C	C	G	C	G	C	C	G	G	G	C	G	G	C	G	C	C	G	C	C	G	C	G	C	G	G	G	G	G	G	G	C
chr1H|HvGBSv2-6155_32611096+18	A/G	1	32611114	+	NA	NA	NA	NA	NA	NA	A	A	G	G	A	G	A	A	A	A	A	A	A	A	A	A	A	A	A	A	A	G	A	A	A	A	A	A	A	A	A	A	A	A	A	A	A	G	A
chr1H|HvGBSv2-6155_32611096+35	G/C	1	32611131	+	NA	NA	NA	NA	NA	NA	G	G	G	G	C	G	G	G	G	G	G	C	G	G	C	G	C	G	C	C	G	G	G	G	G	G	G	G	G	C	G	C	C	G	C	G	C	G	G
chr1H|HvGBSv2-6155_32611096+59	A/C	1	32611155	+	NA	NA	NA	NA	NA	NA	A	A	A	A	A	A	A	A	A	A	A	A	A	A	A	C	A	A	A	A	A	A	A	A	C	A	A	C	A	A	A	A	A	C	A	A	A	A	A
chr1H|HvGBSv2-6155_32611096+118	T/C	1	32611214	+	NA	NA	NA	NA	NA	NA	T	T	T	T	C	T	T	T	T	T	T	C	T	T	C	T	C	T	C	C	T	T	T	T	T	T	T	T	T	C	T	C	C	T	C	T	C	T	T
chr1H|HvGBSv2-6155_32611096+161	A/G	1	32611257	+	NA	NA	NA	NA	NA	NA	A	A	A	A	G	A	A	A	A	A	A	G	A	A	G	A	G	A	G	G	A	A	A	A	A	A	A	A	A	G	A	G	G	A	G	A	G	A	A
chr1H|HvGBSv2-63_32677246+28	T/C	1	32677274	+	NA	NA	NA	NA	NA	NA	C	C	T	T	T	C	T	C	C	T	C	T	C	C	T	T	T	C	T	T	C	T	C	C	T	C	C	T	C	T	C	T	T	T	T	T	T	T	C
chr1H|HvGBSv2-63_32677246+49	T/C	1	32677295	+	NA	NA	NA	NA	NA	NA	T	T	C	C	T	T	T	T	T	T	T	T	T	T	T	C	T	T	T	T	T	C	T	T	T	T	T	T	T	T	T	T	T	T	T	T	T	C	T
chr1H|HvGBSv2-63_32677246+71	A/G	1	32677317	+	NA	NA	NA	NA	NA	NA	A	A	G	G	A	A	A	A	A	A	A	A	A	A	A	G	A	A	A	A	A	G	A	A	G	A	A	G	A	A	A	A	A	G	A	A	A	G	A
chr1H|HvGBSv2-63_32677246+134	T/C	1	32677380	+	NA	NA	NA	NA	NA	NA	T	T	T	T	T	T	T	T	T	T	T	T	T	T	T	T	T	T	T	T	T	T	T	T	C	T	T	C	T	T	T	T	T	C	T	T	T	T	T
chr1H|HvGBSv2-73_32850487+140	G/C	1	32850627	+	NA	NA	NA	NA	NA	NA	G	G	G	G	C	G	G	G	G	G	G	C	G	G	C	G	C	G	C	C	G	G	G	G	G	G	G	G	G	C	G	C	C	G	C	G	C	G	G
chr1H|HvGBSv2-73_32850487+141	C/A	1	32850628	+	NA	NA	NA	NA	NA	NA	C	C	C	C	C	C	A	C	C	A	C	C	C	C	C	C	C	C	C	C	C	C	C	C	C	C	C	C	C	C	C	C	C	C	C	C	C	C	C
chr1H|HvGBSv2-6156_33073841+39	G/A	1	33073880	+	NA	NA	NA	NA	NA	NA	G	G	A	A	G	G	G	G	G	G	G	G	G	G	G	A	G	G	G	G	G	A	G	G	A	G	G	A	G	G	G	G	G	A	G	A	G	A	G
chr1H|HvGBSv2-6156_33073841+52	G/T	1	33073893	+	NA	NA	NA	NA	NA	NA	G	G	G	G	T	G	G	G	G	G	G	T	G	G	T	G	T	G	T	T	G	G	G	G	G	G	G	G	G	T	G	T	T	G	T	G	T	G	G
chr1H|HvGBSv2-6156_33073841+62	C/T	1	33073903	+	NA	NA	NA	NA	NA	NA	T	T	C	C	C	T	C	T	T	C	T	C	T	T	C	C	C	T	C	C	T	C	T	T	C	T	T	C	T	C	T	C	C	C	C	C	C	C	T
chr1H|HvGBSv2-6156_33073841+90	C/T	1	33073931	+	NA	NA	NA	NA	NA	NA	T	T	C	C	C	T	C	T	T	C	T	C	T	T	C	C	C	T	C	C	T	C	T	T	C	T	T	C	T	C	T	C	C	C	C	C	C	C	T
chr1H|HvGBSv2-6156_33073841+142	T/C	1	33073983	+	NA	NA	NA	NA	NA	NA	T	T	T	T	C	T	T	T	T	T	T	C	T	T	C	T	C	T	C	C	T	T	T	T	T	T	T	T	T	C	T	C	C	T	C	T	C	T	T
chr1H|HvGBSv2-6157_33516449+35	A/G	1	33516484	+	NA	NA	NA	NA	NA	NA	A	A	A	A	G	A	R	A	A	R	A	G	A	A	G	A	G	A	G	G	A	A	A	A	A	A	A	A	A	G	A	G	G	A	G	A	G	A	A
chr1H|HvGBSv2-6157_33516449+164	G/A	1	33516613	+	NA	NA	NA	NA	NA	NA	G	G	G	G	A	G	R	G	G	R	G	A	G	G	A	G	A	G	A	A	G	G	G	G	G	G	G	G	G	A	G	A	A	G	A	G	A	G	G
chr1H|HvGBSv2-6158_33972005+7	T/A	1	33972012	+	NA	NA	NA	NA	NA	NA	T	T	T	T	A	T	T	T	T	T	T	A	T	T	A	T	A	T	A	A	T	T	T	T	T	T	T	T	T	A	T	A	A	T	A	T	A	T	T
chr1H|HvGBSv2-6158_33972005+62	G/T	1	33972067	+	NA	NA	NA	NA	NA	NA	G	G	G	G	T	G	G	G	G	G	G	T	G	G	T	G	T	G	T	T	G	G	G	G	G	G	G	G	G	T	G	T	T	G	T	G	T	G	G
chr1H|HvGBSv2-6158_33972005+64	G/T	1	33972069	+	NA	NA	NA	NA	NA	NA	G	G	G	G	T	G	G	G	G	G	G	T	G	G	T	G	T	G	T	T	G	G	G	G	G	G	G	G	G	T	G	T	T	G	T	G	T	G	G
chr1H|HvGBSv2-6158_33972005+65	G/T	1	33972070	+	NA	NA	NA	NA	NA	NA	G	G	G	G	T	G	G	G	G	G	G	T	G	G	T	G	T	G	T	T	G	G	G	G	G	G	G	G	G	T	G	T	T	G	T	G	T	G	G
chr1H|HvGBSv2-6158_33972005+93	G/A	1	33972098	+	NA	NA	NA	NA	NA	NA	G	G	G	G	A	G	G	G	G	G	G	A	G	G	A	G	A	G	A	A	G	G	G	G	G	G	G	G	G	A	G	A	A	G	A	G	A	G	G
chr1H|HvGBSv2-6158_33972005+174	G/A	1	33972179	+	NA	NA	NA	NA	NA	NA	G	G	G	G	A	G	G	G	G	G	G	A	G	G	A	G	A	G	A	A	G	G	G	G	G	G	G	G	G	A	G	A	A	G	A	G	A	G	G
chr1H|HvGBSv2-6158_33972005+179	T/C	1	33972184	+	NA	NA	NA	NA	NA	NA	T	T	T	T	C	T	T	T	T	T	T	C	T	T	C	T	C	T	C	C	T	T	T	T	T	T	T	T	T	C	T	C	C	T	C	T	C	T	T
chr1H|HvGBSv2-75_34265997+4	G/A	1	34266001	+	NA	NA	NA	NA	NA	NA	G	G	G	G	A	G	G	G	G	G	G	A	G	G	A	G	A	G	A	A	G	G	G	G	G	G	G	G	G	A	G	A	A	G	A	G	A	G	G
chr1H|HvGBSv2-75_34265997+10	G/A	1	34266007	+	NA	NA	NA	NA	NA	NA	G	G	G	G	A	G	G	G	G	G	G	A	G	G	A	G	A	G	A	A	G	G	G	G	G	G	G	G	G	A	G	A	A	G	A	G	A	G	G
chr1H|HvGBSv2-75_34265997+19	C/T	1	34266016	+	NA	NA	NA	NA	NA	NA	C	C	C	C	Y	C	C	C	C	C	C	T	C	C	T	C	T	C	C	T	C	C	C	C	C	C	C	C	C	T	C	T	Y	C	T	C	Y	C	C
chr1H|HvGBSv2-75_34265997+48	G/A	1	34266045	+	NA	NA	NA	NA	NA	NA	G	G	G	G	A	G	G	G	G	G	G	A	G	G	A	G	A	G	A	A	G	G	G	G	G	G	G	G	G	A	G	A	A	G	A	G	A	G	G
chr1H|HvGBSv2-75_34265997+55	T/A	1	34266052	+	NA	NA	NA	NA	NA	NA	T	T	T	T	A	T	T	T	T	T	T	A	T	T	A	T	A	T	A	A	T	T	T	T	T	T	T	T	T	A	T	A	A	T	A	T	A	T	T
chr1H|HvGBSv2-75_34265997+57	A/G	1	34266054	+	NA	NA	NA	NA	NA	NA	A	A	A	A	R	A	A	A	A	A	A	A	A	A	A	A	A	A	G	A	A	A	A	A	A	A	A	A	A	A	A	A	R	A	A	A	R	A	A
chr1H|HvGBSv2-75_34265997+100	G/T	1	34266097	+	NA	NA	NA	NA	NA	NA	G	G	G	G	T	G	G	G	G	G	G	T	G	G	T	G	T	G	T	T	G	G	G	G	G	G	G	G	G	T	G	T	T	G	T	G	T	G	G
chr1H|HvGBSv2-75_34265997+124	C/G	1	34266121	+	NA	NA	NA	NA	NA	NA	C	C	C	C	G	C	C	C	C	C	C	G	C	C	G	C	G	C	G	G	C	C	C	C	C	C	C	C	C	G	C	G	G	C	G	C	G	C	C
chr1H|HvGBSv2-75_34265997+142	T/C	1	34266139	+	NA	NA	NA	NA	NA	NA	T	T	T	T	C	T	T	T	T	T	T	C	T	T	C	T	C	T	C	C	T	T	T	T	T	T	T	T	T	C	T	C	C	T	C	T	C	T	T
chr1H|HvGBSv2-75_34265997+152	C/T	1	34266149	+	NA	NA	NA	NA	NA	NA	C	C	C	C	T	C	C	C	C	C	C	T	C	C	T	C	T	C	T	T	C	C	C	C	C	C	C	C	C	T	C	T	T	C	T	C	T	C	C
chr1H|HvGBSv2-76_34692637+6	A/G	1	34692643	+	NA	NA	NA	NA	NA	NA	A	A	A	A	A	G	G	A	A	A	A	A	A	A	A	A	A	A	A	A	A	A	A	A	A	A	G	A	A	A	A	A	A	A	A	A	A	A	A
chr1H|HvGBSv2-76_34692637+35	A/G	1	34692672	+	NA	NA	NA	NA	NA	NA	A	A	A	A	A	G	G	A	A	A	A	A	A	A	A	A	A	A	A	A	A	A	A	A	A	A	G	A	A	A	A	A	A	A	A	A	A	A	A
chr1H|HvGBSv2-76_34692637+113	T/G	1	34692750	+	NA	NA	NA	NA	NA	NA	T	T	T	T	G	T	T	T	T	T	T	G	T	T	G	T	G	T	G	G	T	T	T	T	T	T	T	T	T	G	T	G	G	T	G	T	G	T	T
chr1H|HvGBSv2-76_34692637+120	T/G	1	34692757	+	NA	NA	NA	NA	NA	NA	T	T	T	T	T	G	G	T	T	T	T	T	T	T	T	T	T	T	T	T	T	T	T	T	T	T	G	T	T	T	T	T	T	T	T	T	T	T	T
chr1H|HvGBSv2-76_34692637+123	G/T	1	34692760	+	NA	NA	NA	NA	NA	NA	G	G	G	G	G	T	T	G	G	G	G	G	G	G	G	G	G	G	G	G	G	G	G	G	G	G	T	G	G	G	G	G	G	G	G	G	G	G	G
chr1H|HvGBSv2-76_34692637+131	T/C	1	34692768	+	NA	NA	NA	NA	NA	NA	T	T	C	C	C	T	T	T	T	T	T	T	T	T	T	T	C	T	C	T	T	C	T	T	T	T	T	T	T	C	T	C	C	T	T	T	C	C	T
chr1H|HvGBSv2-76_34692637+159	A/C	1	34692796	+	NA	NA	NA	NA	NA	NA	A	A	C	C	A	A	A	A	A	A	A	A	A	A	A	A	A	A	A	A	A	C	A	A	A	A	A	A	A	A	A	A	A	A	A	A	A	C	A
chr1H|HvGBSv2-76_34692637+160	T/G	1	34692797	+	NA	NA	NA	NA	NA	NA	T	T	G	G	T	T	T	T	T	T	T	T	T	T	T	T	T	T	T	T	T	G	T	T	T	T	T	T	T	T	T	T	T	T	T	T	T	G	T
chr1H|HvGBSv2-76_34692637+163	A/C	1	34692800	+	NA	NA	NA	NA	NA	NA	A	A	A	A	A	C	C	A	A	A	A	A	A	A	A	A	A	A	A	A	A	A	A	A	A	A	C	A	A	A	A	A	A	A	A	A	A	A	A
chr1H|HvGBSv2-76_34692637+165	A/G	1	34692802	+	NA	NA	NA	NA	NA	NA	A	A	A	A	G	A	G	A	A	G	A	G	A	A	G	A	G	A	G	G	A	A	A	A	G	A	A	A	A	G	A	G	G	A	G	A	G	A	A
chr1H|HvGBSv2-76_34692637+172	A/T	1	34692809	+	NA	NA	NA	NA	NA	NA	A	A	A	A	T	A	A	A	A	A	A	T	A	A	T	A	T	A	T	T	A	A	A	A	A	A	A	A	A	T	A	T	T	A	T	A	T	A	A
chr1H|HvGBSv2-76_34692637+178	C/G	1	34692815	+	NA	NA	NA	NA	NA	NA	C	C	C	C	G	C	C	C	C	C	C	G	C	C	G	C	G	C	G	G	C	C	C	C	C	C	C	C	C	G	C	G	G	C	G	C	G	C	C
chr1H|HvGBSv2-6160_34817821+10	C/T	1	34817831	+	NA	NA	NA	NA	NA	NA	T	T	T	T	C	C	C	T	T	C	T	C	T	T	C	C	C	T	C	C	T	T	T	T	C	C	C	C	C	C	T	C	C	C	C	T	C	T	T
chr1H|HvGBSv2-6160_34817821+31	G/A	1	34817852	+	NA	NA	NA	NA	NA	NA	G	G	G	G	G	A	A	G	G	A	G	G	G	G	G	A	G	G	G	G	G	G	G	G	A	A	A	A	A	G	G	G	G	A	G	G	G	G	G
chr1H|HvGBSv2-6160_34817821+93	A/C	1	34817914	+	NA	NA	NA	NA	NA	NA	A	A	A	A	C	A	A	A	A	A	A	C	A	A	C	A	C	A	C	C	A	A	A	A	A	A	A	A	A	C	A	C	C	A	C	A	C	A	A
chr1H|HvGBSv2-6160_34817821+106	C/T	1	34817927	+	NA	NA	NA	NA	NA	NA	C	C	C	C	T	C	C	C	C	C	C	T	C	C	T	C	T	C	T	T	C	C	C	C	C	C	C	C	C	T	C	T	T	C	T	C	T	C	C
chr1H|HvGBSv2-6160_34817821+114	C/T	1	34817935	+	NA	NA	NA	NA	NA	NA	C	C	C	C	T	C	C	C	C	C	C	T	C	C	T	C	T	C	T	T	C	C	C	C	C	C	C	C	C	T	C	T	T	C	T	C	T	C	C
chr1H|HvGBSv2-6160_34817821+116	T/C	1	34817937	+	NA	NA	NA	NA	NA	NA	T	T	T	T	T	T	T	T	T	T	T	C	T	T	T	T	T	T	T	T	T	T	T	T	T	T	T	T	T	T	T	T	T	T	T	T	T	T	T
chr1H|HvGBSv2-6160_34817821+154	G/C	1	34817975	+	NA	NA	NA	NA	NA	NA	G	G	G	G	G	C	C	G	G	C	G	G	G	G	G	C	G	G	G	G	G	G	G	G	C	C	C	C	C	G	G	G	G	C	G	G	G	G	G
chr1H|HvGBSv2-78_35545789+13	C/T	1	35545802	+	NA	NA	NA	NA	NA	NA	C	C	C	C	T	C	C	C	C	C	C	T	C	C	T	C	T	C	T	T	C	C	C	C	C	C	C	C	C	T	C	T	T	C	T	C	T	C	C
chr1H|HvGBSv2-78_35545789+42	G/T	1	35545831	+	NA	NA	NA	NA	NA	NA	G	G	G	G	T	G	G	G	G	G	G	T	G	G	T	G	T	G	T	T	G	G	G	G	G	G	G	G	G	T	G	T	T	G	T	G	T	G	G
chr1H|HvGBSv2-78_35545789+74	G/T	1	35545863	+	NA	NA	NA	NA	NA	NA	G	G	G	G	T	G	G	G	G	G	G	T	G	G	T	G	T	G	T	T	G	G	G	G	G	G	G	G	G	T	G	T	T	G	T	G	T	G	G
chr1H|HvGBSv2-6164_36460306+53	T/C	1	36460359	+	NA	NA	NA	NA	NA	NA	T	T	T	T	T	T	C	T	T	C	T	T	T	T	T	T	T	T	T	T	T	T	T	T	T	T	T	C	T	T	T	T	T	T	T	T	T	T	T
chr1H|HvGBSv2-80_36462442+49	A/T	1	36462491	+	NA	NA	NA	NA	NA	NA	A	T	A	A	T	A	T	A	A	T	T	T	A	A	A	A	T	A	T	T	A	A	A	A	T	A	A	A	A	T	A	T	T	T	T	T	A	A	A
chr1H|HvGBSv2-80_36462442+108	C/T	1	36462550	+	NA	NA	NA	NA	NA	NA	T	C	C	C	C	C	C	T	C	C	C	C	T	T	T	C	C	T	T	T	T	C	T	C	C	C	C	C	T	C	T	C	C	C	C	C	T	C	T
chr1H|HvGBSv2-80_36462442+121	T/C	1	36462563	+	NA	NA	NA	NA	NA	NA	T	T	C	C	T	T	T	T	T	T	T	T	T	T	T	T	T	T	T	T	T	C	T	T	T	T	T	T	T	T	T	T	T	T	T	T	T	C	T
chr1H|HvGBSv2-6164_36742186+118	G/A	1	36742304	+	NA	NA	NA	NA	NA	NA	G	G	G	G	G	G	A	G	G	A	A	A	G	G	G	A	A	G	G	A	G	A	G	G	G	G	G	A	G	A	G	A	G	G	A	G	G	G	G
chr1H|HvGBSv2-81_36899413+20	T/A	1	36899433	+	NA	NA	NA	NA	NA	NA	T	T	T	T	T	T	A	T	T	A	A	T	T	T	T	T	A	T	T	A	T	T	T	T	T	T	T	A	T	T	T	T	T	T	A	T	T	T	T
chr1H|HvGBSv2-81_36899413+52	G/C	1	36899465	+	NA	NA	NA	NA	NA	NA	G	C	G	G	G	G	G	G	G	G	G	G	G	G	G	G	G	G	G	G	G	C	G	G	G	G	G	G	C	C	G	G	G	G	G	G	C	G	G
chr1H|HvGBSv2-81_36899413+75	G/T	1	36899488	+	NA	NA	NA	NA	NA	NA	G	G	G	G	G	G	T	G	G	T	T	G	G	G	G	G	T	G	G	T	G	G	G	G	G	G	G	T	G	G	G	G	G	G	T	G	G	G	G
chr1H|HvGBSv2-81_36899413+79	G/T	1	36899492	+	NA	NA	NA	NA	NA	NA	G	T	G	G	G	G	G	G	G	G	G	G	G	G	G	G	G	G	G	G	G	T	G	G	G	G	G	G	T	T	G	G	G	G	G	G	T	G	G
chr1H|HvGBSv2-81_36899413+98	G/A	1	36899511	+	NA	NA	NA	NA	NA	NA	G	G	G	G	G	G	A	G	G	A	A	G	G	G	G	G	A	G	G	A	G	G	G	G	G	G	G	A	G	G	G	G	G	G	A	G	G	G	G
chr1H|HvGBSv2-6165_37164336+171	T/C	1	37164507	+	NA	NA	NA	NA	NA	NA	T	T	T	T	T	T	C	T	T	C	C	T	T	T	T	C	C	T	T	C	T	T	T	T	T	T	T	C	T	T	T	T	T	T	C	T	T	T	T
chr1H|HvGBSv2-82_37330928+21	G/C	1	37330949	+	NA	NA	NA	NA	NA	NA	C	G	G	C	C	C	G	C	C	G	G	G	C	C	C	G	G	C	C	G	C	G	C	C	G	C	C	G	G	G	C	G	G	G	G	G	C	C	C
chr1H|HvGBSv2-82_37330928+121	T/C	1	37331049	+	NA	NA	NA	NA	NA	NA	C	T	T	C	C	C	T	C	C	T	T	T	C	C	C	T	T	C	C	T	C	T	C	C	T	C	C	T	T	T	C	T	T	T	T	T	C	C	C
chr1H|HvGBSv2-82_37330928+151	A/C	1	37331079	+	NA	NA	NA	NA	NA	NA	A	A	A	A	A	A	C	A	A	C	C	A	A	A	A	C	C	A	A	C	A	A	A	A	A	A	A	C	A	A	A	A	A	A	C	A	A	A	A
chr1H|HvGBSv2-83_37765640+2	A/G	1	37765642	+	NA	NA	NA	NA	NA	NA	G	A	A	G	A	G	A	G	G	A	A	A	G	G	G	A	A	G	A	A	G	A	G	G	A	G	G	A	A	A	G	A	A	A	A	A	G	G	G
chr1H|HvGBSv2-83_37765640+134	A/C	1	37765774	+	NA	NA	NA	NA	NA	NA	A	A	A	A	A	A	C	A	A	C	C	A	A	A	A	A	C	A	A	C	A	A	A	A	A	A	A	C	A	A	A	A	A	A	C	A	A	A	A
chr1H|HvGBSv2-83_37765640+160	C/G	1	37765800	+	NA	NA	NA	NA	NA	NA	G	C	C	G	C	G	C	G	G	C	C	C	G	G	G	C	C	G	C	C	G	C	G	G	C	G	G	C	C	C	G	C	C	C	C	C	G	G	G
chr1H|HvGBSv2-84_38247068+34	C/A	1	38247102	+	NA	NA	NA	NA	NA	NA	C	A	A	C	A	C	C	C	C	C	A	A	C	C	C	C	C	C	A	C	C	A	C	C	A	C	C	C	A	A	C	A	A	A	C	A	C	C	C
chr1H|HvGBSv2-84_38247068+42	G/T	1	38247110	+	NA	NA	NA	NA	NA	NA	T	G	G	T	G	T	G	T	T	G	G	G	T	T	T	G	G	T	G	G	T	G	T	T	G	T	T	G	G	G	T	G	G	G	G	G	T	T	T
chr1H|HvGBSv2-84_38247068+65	G/A	1	38247133	+	NA	NA	NA	NA	NA	NA	A	G	G	A	G	A	G	A	A	G	G	G	A	A	A	G	G	A	G	G	A	G	A	A	G	A	A	G	G	G	A	G	G	G	G	G	A	A	A
chr1H|HvGBSv2-84_38247068+88	A/C	1	38247156	+	NA	NA	NA	NA	NA	NA	A	C	C	A	C	A	A	A	A	A	C	C	A	A	A	A	A	A	C	A	A	C	A	A	C	A	A	A	C	C	A	C	C	C	A	C	A	A	A
chr1H|HvGBSv2-84_38247068+110	G/T	1	38247178	+	NA	NA	NA	NA	NA	NA	T	G	G	T	G	T	G	T	T	G	G	G	T	T	T	G	G	T	G	G	T	G	T	T	G	T	T	G	G	G	T	G	G	G	G	G	T	T	T
chr1H|HvGBSv2-84_38247068+148	A/C	1	38247216	+	NA	NA	NA	NA	NA	NA	A	A	A	A	A	A	C	A	A	C	A	A	A	A	A	C	C	A	A	C	A	A	A	A	A	A	A	C	A	A	A	A	A	A	C	A	A	A	A
chr1H|HvGBSv2-6168_38480386+5	T/C	1	38480391	+	NA	NA	NA	NA	NA	NA	C	T	T	C	C	C	T	C	C	T	T	C	C	C	C	T	T	C	C	T	C	T	C	C	T	C	C	T	T	T	C	T	T	T	T	T	C	C	C
chr1H|HvGBSv2-6168_38480386+102	G/C	1	38480488	+	NA	NA	NA	NA	NA	NA	C	G	G	C	C	C	G	C	C	G	G	C	C	C	C	G	G	C	C	G	C	G	C	C	G	C	C	G	G	G	C	G	G	G	G	G	C	C	C
chr1H|HvGBSv2-85_38708888+132	G/A	1	38709020	+	NA	NA	NA	NA	NA	NA	G	G	G	G	G	G	A	G	G	A	A	G	G	G	G	A	A	G	G	A	G	G	G	G	G	G	G	A	G	G	G	G	G	G	A	G	G	G	G
chr1H|HvGBSv2-85_38708888+169	G/C	1	38709057	+	NA	NA	NA	NA	NA	NA	G	G	G	G	G	G	C	G	G	C	C	G	G	G	G	G	G	G	G	C	G	G	G	G	G	G	G	G	G	G	G	G	G	G	G	G	G	G	G
chr1H|HvGBSv2-85_38708888+182	T/G	1	38709070	+	NA	NA	NA	NA	NA	NA	G	T	T	G	T	G	T	G	G	T	T	T	G	G	G	T	T	G	T	T	G	T	G	G	T	G	G	T	T	T	G	T	T	T	T	T	G	G	G
chr1H|HvGBSv2-6169_38924654+72	T/A	1	38924726	+	NA	NA	NA	NA	NA	NA	T	T	T	T	T	T	T	T	T	T	T	T	T	T	T	A	T	T	T	T	T	T	T	T	T	T	T	A	T	T	T	T	T	T	T	T	T	T	T
chr1H|HvGBSv2-86_39146432+14	G/C	1	39146446	+	NA	NA	NA	NA	NA	NA	G	C	C	G	C	G	C	G	G	C	C	C	G	G	G	C	G	G	C	C	G	C	G	G	C	G	G	C	C	C	G	C	C	C	G	C	C	G	G
chr1H|HvGBSv2-86_39146432+44	T/C	1	39146476	+	NA	NA	NA	NA	NA	NA	T	C	C	T	C	T	C	T	T	C	C	C	T	T	T	C	T	T	C	C	T	C	T	T	C	T	T	C	C	C	T	C	C	C	T	C	C	T	T
chr1H|HvGBSv2-86_39146432+84	G/A	1	39146516	+	NA	NA	NA	NA	NA	NA	G	A	A	G	A	G	A	G	G	A	A	A	G	G	G	A	G	G	A	A	G	A	G	G	A	G	G	A	A	A	G	A	A	A	G	A	A	G	G
chr1H|HvGBSv2-86_39146432+132	C/T	1	39146564	+	NA	NA	NA	NA	NA	NA	C	T	T	C	T	C	T	C	C	T	T	T	C	C	C	T	C	C	T	T	C	T	C	C	T	C	C	T	T	T	C	T	T	T	C	T	T	C	C
chr1H|HvGBSv2-86_39146432+159	A/G	1	39146591	+	NA	NA	NA	NA	NA	NA	A	G	G	A	G	A	A	A	A	A	A	G	A	A	A	A	A	A	G	A	A	G	A	A	G	A	A	A	G	G	A	G	G	G	A	G	G	A	A
chr1H|HvGBSv2-87_39610544+22	C/T	1	39610566	+	NA	NA	NA	NA	NA	NA	T	C	C	C	C	C	C	C	C	C	C	C	C	C	C	T	C	C	C	C	C	C	C	C	C	C	C	T	C	C	C	C	C	C	C	C	C	C	C
chr1H|HvGBSv2-87_39610544+27	C/T	1	39610571	+	NA	NA	NA	NA	NA	NA	T	C	C	C	C	C	C	C	C	C	C	C	C	C	C	T	C	C	C	C	C	C	C	C	C	C	C	T	C	C	C	C	C	C	C	C	C	C	C
chr1H|HvGBSv2-87_39610544+29	G/A	1	39610573	+	NA	NA	NA	NA	NA	NA	A	G	G	G	G	G	G	G	G	G	G	G	G	G	G	A	G	G	G	G	G	G	G	G	G	G	G	A	G	G	G	G	G	G	G	G	G	G	G
chr1H|HvGBSv2-87_39610544+89	A/C	1	39610633	+	NA	NA	NA	NA	NA	NA	C	A	A	A	A	A	A	A	A	A	A	A	A	A	A	C	A	A	A	A	A	A	A	A	A	A	A	C	A	A	A	A	A	A	A	A	A	A	A
chr1H|HvGBSv2-87_39610544+99	T/C	1	39610643	+	NA	NA	NA	NA	NA	NA	C	T	T	T	T	T	T	T	T	T	T	T	T	T	T	C	T	T	T	T	T	T	T	T	T	T	T	C	T	T	T	T	T	T	T	T	T	T	T
chr1H|HvGBSv2-87_39610544+100	C/T	1	39610644	+	NA	NA	NA	NA	NA	NA	T	C	C	C	C	C	C	C	C	C	C	C	C	C	C	T	C	C	C	C	C	C	C	C	C	C	C	T	C	C	C	C	C	C	C	C	C	C	C
chr1H|HvGBSv2-87_39610544+102	T/C	1	39610646	+	NA	NA	NA	NA	NA	NA	C	T	T	T	T	T	T	T	T	T	T	T	T	T	T	C	T	T	T	T	T	T	T	T	T	T	T	C	T	T	T	T	T	T	T	T	T	T	T
chr1H|HvGBSv2-87_39610544+103	A/G	1	39610647	+	NA	NA	NA	NA	NA	NA	G	A	A	A	A	A	A	A	A	A	A	A	A	A	A	G	A	A	A	A	A	A	A	A	A	A	A	G	A	A	A	A	A	A	A	A	A	A	A
chr1H|HvGBSv2-87_39610544+111	A/C	1	39610655	+	NA	NA	NA	NA	NA	NA	A	C	A	A	C	A	C	A	A	C	C	C	A	C	A	A	A	A	C	C	A	C	A	A	C	A	A	A	C	C	A	C	C	C	A	C	C	A	A
chr1H|HvGBSv2-87_39610544+152	G/A	1	39610696	+	NA	NA	NA	NA	NA	NA	A	G	G	G	G	G	G	G	G	G	G	G	G	G	G	A	G	G	G	G	G	G	G	G	G	G	G	A	G	G	G	G	G	G	G	G	G	G	G
chr1H|HvGBSv2-6171_39783117+4	C/T	1	39783121	+	NA	NA	NA	NA	NA	NA	T	T	C	C	T	C	T	C	C	T	T	T	C	C	C	T	C	C	T	T	C	T	C	C	T	C	C	T	T	T	C	T	T	T	C	T	T	C	C
chr1H|HvGBSv2-6171_39783117+50	G/A	1	39783167	+	NA	NA	NA	NA	NA	NA	A	G	G	G	G	G	G	G	G	G	G	G	G	G	G	A	G	G	G	G	G	G	G	G	G	G	G	A	G	G	G	G	G	G	G	G	G	G	G
chr1H|HvGBSv2-6171_39783117+121	T/G	1	39783238	+	NA	NA	NA	NA	NA	NA	G	T	T	T	T	T	T	T	T	T	T	T	T	T	T	G	T	T	T	T	T	T	T	T	T	T	T	T	T	T	T	T	T	T	T	T	T	T	T
chr1H|HvGBSv2-6171_39783117+167	G/A	1	39783284	+	NA	NA	NA	NA	NA	NA	A	G	G	G	G	G	G	G	G	G	G	G	G	G	G	A	G	G	G	G	G	G	G	G	G	G	G	A	G	G	G	G	G	G	G	G	G	G	G
chr1H|HvGBSv2-89_40508415+8	T/G	1	40508423	+	NA	NA	NA	NA	NA	NA	T	T	T	T	T	K	T	T	T	T	T	T	T	T	T	T	T	T	T	T	T	T	T	T	T	T	T	T	T	T	T	T	T	T	T	K	K	K	T
chr1H|HvGBSv2-89_40508415+130	G/A	1	40508545	+	NA	NA	NA	NA	NA	NA	G	G	G	G	G	G	G	G	G	G	G	G	G	G	A	R	G	G	G	G	G	G	G	G	G	G	G	G	G	G	G	G	G	G	G	G	R	G	G
chr1H|HvGBSv2-89_40508415+144	G/A	1	40508559	+	NA	NA	NA	NA	NA	NA	G	R	G	G	G	G	G	G	G	G	G	G	G	G	G	G	G	G	G	R	G	G	G	G	G	R	G	G	G	G	G	G	G	G	G	G	G	G	G
chr1H|HvGBSv2-89_40508415+163	T/A	1	40508578	+	NA	NA	NA	NA	NA	NA	T	T	T	T	T	T	T	T	T	T	T	T	T	T	A	W	T	T	T	T	T	T	T	T	T	T	T	T	T	T	T	T	T	T	T	T	W	T	T
chr1H|HvGBSv2-6173_40751643+32	G/A	1	40751675	+	NA	NA	NA	NA	NA	NA	A	A	G	G	A	A	G	A	G	G	A	A	G	G	G	A	G	G	A	G	G	A	G	G	A	A	A	A	A	G	A	A	A	A	G	A	A	G	A
chr1H|HvGBSv2-6174_41158465+35	T/G	1	41158500	+	NA	NA	NA	NA	NA	NA	T	T	T	T	T	T	T	T	T	T	T	T	T	T	T	T	T	G	T	T	T	T	G	T	T	T	T	T	T	T	T	T	T	T	T	T	T	T	T
chr1H|HvGBSv2-6174_41158465+97	C/T	1	41158562	+	NA	NA	NA	NA	NA	NA	C	C	T	T	C	C	C	C	C	C	C	C	C	C	C	C	C	C	C	C	C	C	C	C	C	C	C	C	C	C	C	C	C	C	C	C	C	T	C
chr1H|HvGBSv2-91_41414642+63	C/T	1	41414705	+	NA	NA	NA	NA	NA	NA	T	T	T	C	T	T	C	T	C	C	T	T	C	C	T	T	C	C	T	C	C	T	T	C	T	T	T	T	T	C	T	T	T	T	C	T	T	T	T
chr1H|HvGBSv2-91_41414642+89	A/G	1	41414731	+	NA	NA	NA	NA	NA	NA	A	A	A	A	A	A	A	A	A	A	A	A	A	A	A	A	A	A	A	A	A	A	A	A	A	A	A	G	A	G	A	A	A	A	A	A	A	A	A
chr1H|HvGBSv2-91_41414642+94	G/A	1	41414736	+	NA	NA	NA	NA	NA	NA	A	A	A	G	A	A	G	A	G	G	A	A	G	G	A	A	G	G	A	G	G	A	A	G	A	A	A	A	A	G	A	A	A	A	G	A	A	A	A
chr1H|HvGBSv2-91_41414642+108	C/T	1	41414750	+	NA	NA	NA	NA	NA	NA	C	C	C	T	C	C	T	C	T	T	C	T	T	C	C	C	T	T	C	T	T	C	T	T	C	C	C	C	C	C	C	C	C	C	T	C	C	C	C
chr1H|HvGBSv2-91_41414642+109	C/T	1	41414751	+	NA	NA	NA	NA	NA	NA	C	C	C	T	C	C	T	C	T	T	C	T	T	C	C	C	T	T	C	T	T	C	T	T	C	C	C	C	C	C	C	C	C	C	T	C	C	C	C
chr1H|HvGBSv2-91_41414642+139	A/C	1	41414781	+	NA	NA	NA	NA	NA	NA	A	A	A	A	A	A	A	A	A	A	A	A	M	A	A	A	A	A	A	A	A	A	A	A	A	A	A	A	A	A	A	A	A	A	A	A	A	A	A
chr1H|HvGBSv2-6176_42103640+53	A/G	1	42103693	+	NA	NA	NA	NA	NA	NA	A	A	G	G	A	A	A	A	A	A	A	A	G	A	A	A	A	A	A	A	A	A	A	A	A	A	A	A	A	G	A	A	A	A	A	A	A	A	A
chr1H|HvGBSv2-6176_42103640+58	A/T	1	42103698	+	NA	NA	NA	NA	NA	NA	A	A	T	T	A	A	A	A	A	A	A	A	T	A	A	A	A	A	A	A	A	A	A	A	A	A	A	A	A	T	A	A	A	A	A	A	A	A	A
chr1H|HvGBSv2-6176_42103640+65	C/T	1	42103705	+	NA	NA	NA	NA	NA	NA	C	C	T	T	C	C	C	C	C	C	C	C	T	C	C	C	C	C	C	C	C	C	C	C	C	C	C	C	C	T	C	C	C	C	C	C	C	C	C
chr1H|HvGBSv2-6176_42103640+66	T/G	1	42103706	+	NA	NA	NA	NA	NA	NA	T	T	T	T	T	T	T	T	T	T	T	T	T	T	T	T	T	T	T	T	T	T	T	T	G	T	T	T	T	T	T	T	T	G	T	T	T	T	T
chr1H|HvGBSv2-6176_42103640+121	T/C	1	42103761	+	NA	NA	NA	NA	NA	NA	T	T	C	C	T	T	T	T	T	T	T	T	C	T	T	T	T	T	T	T	T	T	T	T	T	T	T	T	T	C	T	T	T	T	T	T	T	T	T
chr1H|HvGBSv2-6176_42103640+142	A/C	1	42103782	+	NA	NA	NA	NA	NA	NA	A	A	C	C	A	A	A	A	A	A	A	A	C	A	A	A	A	A	A	A	A	A	A	A	A	A	A	A	A	C	A	A	A	A	A	A	A	A	A
chr1H|HvGBSv2-6176_42103640+160	G/T	1	42103800	+	NA	NA	NA	NA	NA	NA	G	G	T	T	G	G	G	G	G	G	G	G	T	G	G	G	G	G	G	G	G	G	G	G	G	G	G	G	G	T	G	G	G	G	G	G	G	G	G
chr1H|HvGBSv2-6176_42103640+164	T/A	1	42103804	+	NA	NA	NA	NA	NA	NA	T	T	A	A	T	T	T	T	T	T	T	T	A	T	T	T	T	T	T	T	T	T	T	T	T	T	T	T	T	A	T	T	T	T	T	T	T	T	T
chr1H|HvGBSv2-93_42209593+32	A/T	1	42209625	+	NA	NA	NA	NA	NA	NA	A	A	T	T	A	A	A	A	A	A	A	A	T	A	A	T	A	A	A	A	A	A	A	A	A	A	A	A	A	T	T	A	A	A	A	A	A	T	A
chr1H|HvGBSv2-93_42209593+39	A/G	1	42209632	+	NA	NA	NA	NA	NA	NA	A	A	A	A	A	A	A	A	A	A	A	G	A	A	A	A	A	A	A	A	A	A	A	A	G	A	A	A	A	A	A	A	A	G	A	A	A	A	A
chr1H|HvGBSv2-93_42209593+101	G/T	1	42209694	+	NA	NA	NA	NA	NA	NA	G	G	T	T	G	G	G	G	G	G	G	G	T	G	G	T	G	G	G	G	G	G	G	G	G	G	G	G	G	T	T	G	G	G	G	G	G	T	G
chr1H|HvGBSv2-93_42209593+127	A/G	1	42209720	+	NA	NA	NA	NA	NA	NA	A	A	A	A	A	A	A	A	A	A	A	A	G	A	A	A	A	A	A	A	A	A	A	A	A	A	A	A	A	G	A	A	A	A	A	A	A	A	A
chr1H|HvGBSv2-93_42209593+133	G/C	1	42209726	+	NA	NA	NA	NA	NA	NA	G	G	G	G	G	G	G	G	G	G	G	G	C	G	G	G	G	G	G	G	G	G	G	G	G	G	G	G	G	C	G	G	G	G	G	G	G	G	G
chr1H|HvGBSv2-93_42209593+134	C/T	1	42209727	+	NA	NA	NA	NA	NA	NA	C	C	T	T	C	C	C	C	C	C	C	C	C	C	C	T	C	C	C	C	C	C	C	C	C	C	C	C	C	C	T	C	C	C	C	C	C	T	C
chr1H|HvGBSv2-93_42209593+150	G/A	1	42209743	+	NA	NA	NA	NA	NA	NA	G	G	G	G	G	G	G	G	G	G	G	G	A	G	G	G	G	G	G	G	G	G	G	G	G	G	G	G	G	A	G	G	G	G	G	G	G	G	G
chr1H|HvGBSv2-93_42209593+153	C/T	1	42209746	+	NA	NA	NA	NA	NA	NA	C	C	T	T	C	C	C	C	C	C	C	C	T	C	C	T	C	C	C	C	C	C	C	C	C	C	C	C	C	T	T	C	C	C	C	C	C	T	C
chr1H|HvGBSv2-6178_42945409+37	G/C	1	42945446	+	NA	NA	NA	NA	NA	NA	G	G	G	G	G	G	G	G	G	G	G	C	G	G	G	G	G	G	G	G	G	G	G	G	G	G	G	G	G	G	G	G	G	G	G	G	G	G	G
chr1H|HvGBSv2-6178_42945409+142	A/G	1	42945551	+	NA	NA	NA	NA	NA	NA	A	A	A	A	A	A	A	A	A	A	A	A	G	A	A	A	A	A	A	A	A	A	A	A	A	A	A	A	A	G	A	A	A	A	A	A	A	A	A
chr1H|HvGBSv2-6178_42945409+159	C/G	1	42945568	+	NA	NA	NA	NA	NA	NA	C	C	C	C	C	C	C	C	C	C	C	C	G	C	C	C	C	C	C	C	C	C	C	C	C	C	C	C	C	G	C	C	C	C	C	C	C	C	C
chr1H|HvGBSv2-6178_42945409+160	A/C	1	42945569	+	NA	NA	NA	NA	NA	NA	A	A	A	A	A	A	A	A	A	A	A	A	C	A	A	A	A	A	A	A	A	A	A	A	A	A	A	A	A	C	A	A	A	A	A	A	A	A	A
chr1H|HvGBSv2-6178_42945409+162	C/G	1	42945571	+	NA	NA	NA	NA	NA	NA	C	C	C	C	C	C	C	C	C	C	C	C	G	C	C	C	C	C	C	C	C	C	C	C	C	C	C	C	C	G	C	C	C	C	C	C	C	C	C
chr1H|HvGBSv2-95_43146842+5	A/G	1	43146847	+	NA	NA	NA	NA	NA	NA	A	A	A	A	A	A	A	A	A	A	A	A	G	A	A	A	A	A	A	A	A	A	A	A	A	A	A	G	A	G	A	A	A	A	A	A	G	A	A
chr1H|HvGBSv2-95_43146842+58	T/C	1	43146900	+	NA	NA	NA	NA	NA	NA	C	T	T	T	C	C	T	T	T	T	C	T	T	T	T	C	T	T	C	T	T	T	T	T	T	C	C	T	T	C	T	C	C	T	T	T	T	C	T
chr1H|HvGBSv2-95_43146842+75	T/C	1	43146917	+	NA	NA	NA	NA	NA	NA	T	T	T	T	T	T	T	T	T	T	T	T	C	T	T	T	T	T	T	T	T	T	T	T	T	T	T	C	T	C	T	T	T	T	T	T	C	T	T
chr1H|HvGBSv2-95_43146842+121	T/C	1	43146963	+	NA	NA	NA	NA	NA	NA	T	T	T	T	T	T	T	T	T	T	T	T	C	T	T	T	T	T	T	T	T	T	T	T	T	T	T	C	T	C	T	T	T	T	T	T	C	T	T
chr1H|HvGBSv2-6179_43380505+45	G/T	1	43380550	+	NA	NA	NA	NA	NA	NA	G	T	G	G	G	G	G	G	G	G	G	G	G	G	G	G	G	G	G	G	G	G	G	G	G	G	G	G	G	G	G	G	G	G	G	G	G	G	G
chr1H|HvGBSv2-96_43654339+84	T/C	1	43654423	+	NA	NA	NA	NA	NA	NA	T	T	T	T	T	T	T	T	T	T	T	T	C	T	T	T	T	T	T	T	T	T	T	T	T	T	T	T	T	C	T	T	T	T	T	T	T	T	T
chr1H|HvGBSv2-96_43654339+88	T/A	1	43654427	+	NA	NA	NA	NA	NA	NA	T	T	A	A	T	T	T	T	T	T	T	T	T	T	T	A	T	T	T	T	T	T	T	T	T	T	T	T	A	T	A	T	T	T	T	T	T	A	T
chr1H|HvGBSv2-96_43654339+117	A/G	1	43654456	+	NA	NA	NA	NA	NA	NA	A	A	G	G	A	A	A	A	A	A	A	A	A	A	A	G	A	A	A	A	A	A	A	A	A	A	A	A	G	A	G	A	A	A	A	A	A	G	A
chr1H|HvGBSv2-96_43654339+118	T/G	1	43654457	+	NA	NA	NA	NA	NA	NA	T	T	G	G	T	T	T	T	T	T	T	T	T	T	T	G	T	T	T	T	T	T	T	T	T	T	T	T	G	T	G	T	T	T	T	T	T	G	T
chr1H|HvGBSv2-96_43654339+124	G/C	1	43654463	+	NA	NA	NA	NA	NA	NA	G	G	C	C	G	G	G	G	G	G	G	G	G	G	G	C	G	G	G	G	G	G	G	G	G	G	G	G	C	G	C	G	G	G	G	G	G	C	G
chr1H|HvGBSv2-96_43654339+148	A/G	1	43654487	+	NA	NA	NA	NA	NA	NA	A	A	A	A	A	A	A	A	A	A	A	A	A	A	A	A	A	A	A	A	A	A	A	A	A	A	A	A	A	A	A	A	A	A	A	A	A	A	A
chr1H|HvGBSv2-6180_43788415+5	A/G	1	43788420	+	NA	NA	NA	NA	NA	NA	A	A	A	A	A	A	A	A	A	A	A	A	G	A	A	A	A	A	A	A	A	A	A	A	A	A	A	A	A	G	A	A	A	A	A	A	A	A	A
chr1H|HvGBSv2-6180_43788415+150	T/C	1	43788565	+	NA	NA	NA	NA	NA	NA	T	T	T	T	T	T	T	T	T	T	T	C	T	T	T	T	T	T	T	T	T	T	T	T	C	T	T	T	T	T	T	T	T	C	T	T	T	T	T
chr1H|HvGBSv2-803_44235762+6	G/A	1	44235768	+	NA	NA	NA	NA	NA	NA	R	G	A	G	G	G	G	G	G	G	G	G	A	G	G	G	G	G	G	G	G	G	G	G	A	G	G	A	A	A	G	G	G	G	A	G	A	A	G
chr1H|HvGBSv2-803_44235762+76	A/G	1	44235838	+	NA	NA	NA	NA	NA	NA	R	A	A	A	A	A	A	A	A	A	A	A	G	A	A	A	A	A	A	A	A	A	A	A	A	A	A	G	A	A	A	A	A	A	G	A	A	A	A
chr1H|HvGBSv2-803_44235762+151	C/A	1	44235913	+	NA	NA	NA	NA	NA	NA	M	C	A	C	C	C	C	C	C	C	C	C	A	C	C	C	C	C	C	C	C	C	C	C	A	C	C	A	A	A	C	C	C	C	A	C	A	A	C
chr1H|HvGBSv2-6181_44322420+2	T/G	1	44322422	+	NA	NA	NA	NA	NA	NA	T	T	T	T	T	T	T	T	T	T	T	T	T	T	T	T	T	T	T	T	T	T	T	T	T	T	T	G	T	T	T	T	T	T	T	T	G	T	T
chr1H|HvGBSv2-6181_44322420+8	G/T	1	44322428	+	NA	NA	NA	NA	NA	NA	G	G	T	T	G	G	G	G	G	G	G	G	T	G	G	G	G	G	G	G	G	G	G	G	G	G	G	T	T	T	G	G	G	G	G	G	T	G	G
chr1H|HvGBSv2-6181_44322420+132	A/T	1	44322552	+	NA	NA	NA	NA	NA	NA	A	A	A	A	A	A	A	A	A	A	A	T	A	A	A	A	A	A	A	A	A	A	A	A	T	A	A	A	A	A	A	A	A	T	A	A	A	A	A
chr1H|HvGBSv2-6181_44322420+161	T/C	1	44322581	+	NA	NA	NA	NA	NA	NA	T	T	T	T	T	T	T	T	T	T	T	T	C	T	T	T	T	T	T	T	T	T	T	T	T	T	T	T	T	C	T	T	T	T	T	T	T	T	T
chr1H|HvGBSv2-6182_44759356+41	G/A	1	44759397	+	NA	NA	NA	NA	NA	NA	G	G	G	G	G	G	G	G	G	G	G	G	A	G	G	G	G	G	G	G	G	G	G	G	G	G	G	G	G	A	G	G	G	G	G	G	G	G	G
chr1H|HvGBSv2-6182_44759356+84	C/T	1	44759440	+	NA	NA	NA	NA	NA	NA	C	C	C	C	C	C	C	C	C	C	C	C	T	C	C	C	C	C	C	C	C	C	C	C	C	C	C	C	C	T	C	C	C	C	C	C	C	C	C
chr1H|HvGBSv2-6182_44759356+123	G/A	1	44759479	+	NA	NA	NA	NA	NA	NA	G	G	A	A	G	G	G	G	G	G	G	G	A	G	G	A	G	G	G	G	G	G	G	G	G	G	G	A	A	A	G	G	G	G	G	G	G	A	G
chr1H|HvGBSv2-6182_44759356+164	G/C	1	44759520	+	NA	NA	NA	NA	NA	NA	G	G	C	C	G	G	G	G	G	G	G	G	G	G	G	C	G	G	G	G	G	G	G	G	G	G	G	G	C	G	G	G	G	G	G	G	G	C	G
chr1H|HvGBSv2-99_45032927+39	T/G	1	45032966	+	NA	NA	NA	NA	NA	NA	T	T	T	T	T	T	T	T	T	T	T	G	T	T	T	T	T	T	T	T	T	T	T	T	G	T	T	T	T	T	T	T	T	G	T	T	T	T	K
chr1H|HvGBSv2-6183_45230750+17	T/C	1	45230767	+	NA	NA	NA	NA	NA	NA	T	T	T	T	T	T	T	T	T	T	T	T	T	T	T	T	T	T	T	T	T	T	T	T	T	T	T	T	T	T	T	T	T	T	T	T	T	T	T
chr1H|HvGBSv2-6183_45230750+22	T/C	1	45230772	+	NA	NA	NA	NA	NA	NA	T	T	C	C	T	T	T	T	T	T	T	T	T	T	T	C	T	T	T	T	T	T	T	T	T	T	T	T	C	T	T	T	T	T	T	T	T	C	T
chr1H|HvGBSv2-6183_45230750+56	A/G	1	45230806	+	NA	NA	NA	NA	NA	NA	A	A	G	G	A	A	A	A	A	A	A	A	G	A	A	G	A	A	A	A	A	A	A	A	A	A	A	G	G	G	A	A	A	A	A	A	G	G	A
chr1H|HvGBSv2-6183_45230750+87	T/C	1	45230837	+	NA	NA	NA	NA	NA	NA	T	T	C	C	T	T	T	T	T	T	T	T	T	T	T	C	T	T	T	T	T	T	T	T	T	T	T	T	C	T	T	T	T	T	T	T	T	C	T
chr1H|HvGBSv2-6183_45230750+132	A/G	1	45230882	+	NA	NA	NA	NA	NA	NA	A	A	A	A	A	A	A	A	A	A	A	A	A	A	A	A	A	A	A	A	A	A	A	A	A	A	A	A	A	A	A	A	A	A	A	A	A	A	A
chr1H|HvGBSv2-6183_45230750+154	C/T	1	45230904	+	NA	NA	NA	NA	NA	NA	C	C	T	T	C	C	C	C	C	C	C	C	T	C	C	T	C	C	C	C	C	C	C	C	C	C	C	T	T	T	C	C	C	C	C	C	T	T	C
chr1H|HvGBSv2-6184_45678374+27	G/A	1	45678401	+	NA	NA	NA	NA	NA	NA	G	G	G	G	G	G	G	G	G	G	G	G	G	G	G	G	G	G	G	G	G	G	G	G	G	G	G	A	G	G	G	G	G	G	G	G	G	G	G
chr1H|HvGBSv2-6184_45678374+28	C/A	1	45678402	+	NA	NA	NA	NA	NA	NA	C	C	C	C	C	C	C	C	C	C	C	C	C	C	C	C	C	C	C	C	C	C	C	C	C	C	C	A	C	C	C	C	C	C	C	C	C	C	C
chr1H|HvGBSv2-1080_45765211+6	A/G	1	45765217	+	NA	NA	NA	NA	NA	NA	A	A	G	G	A	A	A	A	A	A	A	A	A	A	A	G	A	A	A	A	A	A	A	A	A	A	A	R	G	A	A	A	A	A	A	A	A	G	A
chr1H|HvGBSv2-1080_45765211+31	A/G	1	45765242	+	NA	NA	NA	NA	NA	NA	A	A	G	G	A	A	A	A	A	A	A	A	A	A	A	G	A	A	A	A	A	A	A	A	A	A	A	R	G	A	A	A	A	A	A	A	A	G	A
chr1H|HvGBSv2-1080_45765211+57	G/A	1	45765268	+	NA	NA	NA	NA	NA	NA	G	G	A	A	G	G	G	G	G	G	G	G	A	G	G	A	G	G	G	G	G	G	G	G	G	G	G	A	A	A	G	G	G	G	G	G	G	A	G
chr1H|HvGBSv2-6187_47005620+18	T/C	1	47005638	+	NA	NA	NA	NA	NA	NA	T	T	C	C	T	T	T	C	T	T	T	T	T	T	T	C	T	T	T	T	T	C	T	T	T	T	T	T	C	T	T	T	T	T	T	T	T	C	T
chr1H|HvGBSv2-6187_47005620+39	A/G	1	47005659	+	NA	NA	NA	NA	NA	NA	A	A	A	A	A	A	A	A	A	A	A	A	G	A	A	A	A	A	A	A	A	A	A	A	A	A	A	G	A	G	A	A	A	A	A	A	A	A	A
chr1H|HvGBSv2-6187_47005620+48	C/T	1	47005668	+	NA	NA	NA	NA	NA	NA	C	C	C	C	C	C	C	C	C	C	C	C	T	C	C	C	C	C	C	C	C	C	C	C	C	C	C	T	C	T	C	C	C	C	C	C	C	C	C
chr1H|HvGBSv2-6187_47005620+54	A/G	1	47005674	+	NA	NA	NA	NA	NA	NA	A	A	A	A	A	A	A	A	A	A	A	A	G	A	A	A	A	A	A	A	A	A	A	A	A	A	A	G	A	G	A	A	A	A	A	A	G	A	A
chr1H|HvGBSv2-6187_47005620+77	G/A	1	47005697	+	NA	NA	NA	NA	NA	NA	G	G	G	G	G	G	G	G	G	G	G	G	A	G	G	G	G	G	G	G	G	G	G	G	G	G	G	A	G	A	G	G	G	G	G	G	G	G	G
chr1H|HvGBSv2-6187_47005620+82	A/G	1	47005702	+	NA	NA	NA	NA	NA	NA	A	A	G	G	A	A	A	A	A	A	A	A	A	A	A	G	A	A	A	A	A	A	A	A	A	A	A	A	G	A	A	A	A	A	A	A	A	G	A
chr1H|HvGBSv2-6187_47005620+127	A/C	1	47005747	+	NA	NA	NA	NA	NA	NA	A	A	A	A	A	A	A	A	A	A	A	A	A	A	A	A	A	A	A	A	A	A	A	A	A	A	A	A	A	A	A	C	C	A	A	A	A	A	A
chr1H|HvGBSv2-6188_47542358+48	G/A	1	47542406	+	NA	NA	NA	NA	NA	NA	G	G	G	G	G	G	G	G	G	G	G	G	G	G	G	G	G	G	G	G	G	G	G	G	G	G	G	G	G	G	G	G	G	G	G	G	G	G	G
chr1H|HvGBSv2-6188_47542358+51	C/T	1	47542409	+	NA	NA	NA	NA	NA	NA	C	C	T	T	C	C	C	T	C	C	C	C	Y	C	C	T	C	C	C	C	C	T	C	C	C	C	C	C	T	C	C	C	C	C	C	C	C	T	C
chr1H|HvGBSv2-6188_47542358+91	T/C	1	47542449	+	NA	NA	NA	NA	NA	NA	T	T	C	C	T	T	T	C	T	T	T	T	Y	T	T	C	T	T	T	T	T	C	T	T	T	T	T	T	C	T	T	T	T	T	T	T	T	C	T
chr1H|HvGBSv2-6189_47923940+28	A/G	1	47923968	+	NA	NA	NA	NA	NA	NA	A	A	A	A	A	A	A	A	G	A	A	A	A	A	A	A	G	G	A	A	G	A	G	G	A	A	A	A	A	A	A	A	A	A	G	A	A	A	A
chr1H|HvGBSv2-6189_47923940+71	T/C	1	47924011	+	NA	NA	NA	NA	NA	NA	T	T	C	C	T	T	T	C	T	T	T	T	C	T	T	C	T	T	T	T	T	C	T	T	T	T	T	C	C	C	T	T	T	T	T	T	T	C	T
chr1H|HvGBSv2-6189_47923940+123	A/C	1	47924063	+	NA	NA	NA	NA	NA	NA	A	A	A	A	A	A	A	A	C	A	A	A	A	A	A	A	C	A	A	A	A	A	A	C	A	A	A	A	A	A	A	A	A	A	A	A	A	A	A
chr1H|HvGBSv2-6189_47923940+133	T/A	1	47924073	+	NA	NA	NA	NA	NA	NA	T	T	T	T	T	T	T	T	T	T	T	T	T	T	T	T	T	T	T	T	T	T	T	T	T	T	T	T	T	T	T	T	T	T	T	T	T	T	T
chr1H|HvGBSv2-6189_47923940+137	A/G	1	47924077	+	NA	NA	NA	NA	NA	NA	A	A	A	A	A	A	A	A	A	A	A	A	A	A	A	A	A	A	A	A	A	A	A	A	A	A	A	G	A	A	A	A	A	A	A	A	A	A	A
chr1H|HvGBSv2-6189_47923940+138	C/T	1	47924078	+	NA	NA	NA	NA	NA	NA	C	C	T	T	C	C	C	T	C	C	C	C	T	C	C	T	C	C	C	C	C	T	C	C	C	C	C	T	T	T	C	C	C	C	C	C	C	T	C
chr1H|HvGBSv2-6189_47923940+158	T/C	1	47924098	+	NA	NA	NA	NA	NA	NA	T	T	C	C	T	T	T	C	T	T	T	T	C	T	T	C	T	T	T	T	T	C	T	T	T	T	T	T	C	C	T	T	T	T	T	T	T	C	T
chr1H|HvGBSv2-103_48132771+81	A/G	1	48132852	+	NA	NA	NA	NA	NA	NA	A	A	A	A	A	A	A	A	A	A	A	A	A	A	A	A	A	A	A	A	A	A	A	A	A	A	A	A	A	A	A	A	A	A	A	A	A	A	A
chr1H|HvGBSv2-103_48132771+101	G/A	1	48132872	+	NA	NA	NA	NA	NA	NA	G	A	G	G	G	G	G	G	G	G	G	G	G	G	G	G	G	G	G	G	G	G	G	G	G	G	G	G	G	G	G	G	G	G	G	G	G	G	G
chr1H|HvGBSv2-103_48132771+134	C/T	1	48132905	+	NA	NA	NA	NA	NA	NA	C	C	T	T	C	C	C	T	C	C	C	C	T	C	C	T	C	C	C	C	C	T	C	C	C	C	C	T	T	T	C	C	C	C	C	C	C	T	C
chr1H|HvGBSv2-6192_49220854+38	G/A	1	49220892	+	NA	NA	NA	NA	NA	NA	G	G	G	G	G	G	G	G	G	G	G	G	G	G	G	G	G	G	G	G	G	A	G	G	G	G	G	G	G	G	G	G	G	G	G	G	G	G	G
chr1H|HvGBSv2-6192_49220854+72	A/C	1	49220926	+	NA	NA	NA	NA	NA	NA	A	A	C	C	A	A	A	A	A	A	A	A	A	A	A	C	A	A	A	A	A	A	C	A	A	A	A	A	C	A	A	A	A	A	A	A	A	C	A
chr1H|HvGBSv2-6192_49220854+141	G/C	1	49220995	+	NA	NA	NA	NA	NA	NA	G	G	G	G	G	G	G	G	G	G	G	G	C	G	G	G	G	G	G	G	G	G	G	G	G	G	G	G	G	C	G	G	G	G	G	G	G	G	G
chr1H|HvGBSv2-6192_49220854+144	A/G	1	49220998	+	NA	NA	NA	NA	NA	NA	A	A	A	A	A	A	A	A	A	A	A	A	G	A	A	A	A	A	A	A	A	G	A	A	A	A	A	A	A	G	A	A	A	A	A	A	A	A	A
chr1H|HvGBSv2-106_49510883+99	A/G	1	49510982	+	NA	NA	NA	NA	NA	NA	A	A	A	A	A	A	A	A	A	A	A	A	A	A	A	A	A	A	A	A	A	A	A	A	A	A	A	A	G	A	A	A	A	A	A	A	A	A	A
chr1H|HvGBSv2-106_49510883+148	G/A	1	49511031	+	NA	NA	NA	NA	NA	NA	G	G	G	G	G	G	G	A	G	G	G	G	G	G	G	G	G	G	G	G	G	A	G	G	G	G	G	G	A	G	G	G	G	G	G	G	A	G	G
chr1H|HvGBSv2-647_49648943+96	A/C	1	49649039	+	NA	NA	NA	NA	NA	NA	A	A	A	A	A	A	A	A	A	A	A	A	A	A	A	A	A	A	A	A	A	A	A	A	A	A	A	A	C	A	A	A	A	A	A	A	A	A	A
chr1H|HvGBSv2-647_49648943+118	C/A	1	49649061	+	NA	NA	NA	NA	NA	NA	C	C	C	C	C	C	C	A	C	C	C	C	A	C	C	C	C	C	C	C	C	A	C	C	C	C	C	A	A	A	C	C	C	C	C	C	A	C	C
chr1H|HvGBSv2-6193_49746787+5	A/G	1	49746792	+	NA	NA	NA	NA	NA	NA	A	A	A	A	A	A	A	A	A	A	A	A	A	A	A	A	A	G	A	A	G	A	A	A	A	A	A	A	A	A	A	A	A	A	A	A	A	A	A
chr1H|HvGBSv2-107_49942071+8	T/C	1	49942079	+	NA	NA	NA	NA	NA	NA	T	T	T	T	T	T	T	C	T	T	T	T	T	T	T	T	T	T	T	T	T	C	T	T	T	T	T	T	T	T	T	T	T	T	T	T	T	T	T
chr1H|HvGBSv2-107_49942071+45	T/C	1	49942116	+	NA	NA	NA	NA	NA	NA	T	T	T	T	T	T	T	C	T	T	T	T	T	T	T	T	T	T	T	T	T	C	T	T	T	T	T	T	T	T	T	T	T	T	T	T	T	T	T
chr1H|HvGBSv2-107_49942071+91	G/C	1	49942162	+	NA	NA	NA	NA	NA	NA	G	G	G	G	G	G	G	C	G	G	G	G	G	G	G	G	G	G	G	G	G	C	G	G	G	G	G	G	G	G	G	G	G	G	G	G	G	G	G
chr1H|HvGBSv2-107_49942071+130	A/G	1	49942201	+	NA	NA	NA	NA	NA	NA	A	A	A	A	A	A	A	A	G	A	A	A	A	A	A	A	G	G	A	A	G	A	G	G	A	A	A	A	A	A	A	A	A	A	G	A	A	A	A
chr1H|HvGBSv2-108_50483853+8	T/C	1	50483861	+	NA	NA	NA	NA	NA	NA	T	T	T	T	T	T	T	T	T	T	T	T	T	T	T	T	T	T	T	T	T	T	T	T	T	T	T	T	C	T	T	T	T	T	T	T	T	T	T
chr1H|HvGBSv2-108_50483853+26	T/G	1	50483879	+	NA	NA	NA	NA	NA	NA	T	T	T	T	T	T	T	T	T	T	T	T	T	T	T	T	T	T	T	T	T	T	T	T	T	T	T	T	G	T	T	T	T	T	T	T	T	T	T
chr1H|HvGBSv2-108_50483853+31	T/G	1	50483884	+	NA	NA	NA	NA	NA	NA	T	T	T	T	T	T	T	T	T	T	T	T	T	T	T	T	T	T	T	T	T	T	T	T	T	T	T	T	G	G	T	T	T	T	T	T	K	T	T
chr1H|HvGBSv2-108_50483853+53	T/G	1	50483906	+	NA	NA	NA	NA	NA	NA	T	T	T	T	T	T	T	T	T	T	T	T	T	T	T	T	T	T	T	T	T	T	T	T	T	T	T	T	G	G	T	T	T	T	T	T	K	T	T
chr1H|HvGBSv2-108_50483853+136	T/C	1	50483989	+	NA	NA	NA	NA	NA	NA	T	T	T	T	T	T	T	T	T	T	T	T	T	T	T	T	T	T	T	T	T	T	T	T	T	T	T	T	C	T	T	T	T	T	T	T	T	T	T
chr1H|HvGBSv2-108_50483853+138	A/G	1	50483991	+	NA	NA	NA	NA	NA	NA	A	A	A	A	A	A	A	A	A	A	A	A	A	A	A	A	A	A	A	A	A	A	A	A	A	A	A	A	A	G	A	A	A	A	A	A	R	A	A
chr1H|HvGBSv2-108_50483853+155	A/G	1	50484008	+	NA	NA	NA	NA	NA	NA	A	A	A	A	A	A	A	A	A	A	A	A	A	A	A	A	A	A	A	A	A	A	A	A	A	A	A	A	A	G	A	A	A	A	A	A	R	A	A
chr1H|HvGBSv2-6194_51020062+19	C/G	1	51020081	+	NA	NA	NA	NA	NA	NA	C	C	C	C	C	C	C	C	C	C	C	C	C	C	C	C	C	C	C	C	C	C	C	C	C	C	C	C	G	C	C	C	C	C	C	C	C	C	C
chr1H|HvGBSv2-6194_51020062+76	A/G	1	51020138	+	NA	NA	NA	NA	NA	NA	A	A	A	A	A	A	G	A	G	G	A	A	A	G	A	A	G	G	A	G	G	A	A	G	A	A	A	A	A	A	A	A	A	A	G	A	A	A	A
chr1H|HvGBSv2-6194_51020062+88	A/G	1	51020150	+	NA	NA	NA	NA	NA	NA	A	A	A	A	A	A	A	A	A	A	A	A	A	A	A	A	A	A	A	A	A	A	A	A	A	A	A	A	G	A	A	A	A	A	A	A	A	A	A
chr1H|HvGBSv2-6194_51020062+136	T/C	1	51020198	+	NA	NA	NA	NA	NA	NA	T	T	T	T	T	T	T	C	T	T	T	T	T	T	T	T	T	T	T	T	T	C	T	T	T	T	T	T	T	T	T	T	T	T	T	T	T	T	T
chr1H|HvGBSv2-6194_51020062+144	A/G	1	51020206	+	NA	NA	NA	NA	NA	NA	A	A	A	A	A	A	A	G	A	A	A	A	A	A	A	A	A	A	A	A	A	G	A	A	A	A	A	A	A	A	A	A	A	A	A	A	A	A	A
chr1H|HvGBSv2-109_51645213+48	T/C	1	51645261	+	NA	NA	NA	NA	NA	NA	T	T	T	T	T	T	T	C	T	T	T	T	T	T	T	T	T	T	T	T	T	C	T	T	T	T	T	T	T	T	T	T	T	T	T	T	T	T	T
chr1H|HvGBSv2-109_51645213+82	A/G	1	51645295	+	NA	NA	NA	NA	NA	NA	A	A	A	A	A	A	A	A	A	A	A	A	A	A	A	A	A	A	A	A	A	A	A	A	A	A	A	A	A	G	A	A	A	A	A	A	G	A	A
chr1H|HvGBSv2-6195_51993920+12	G/T	1	51993932	+	NA	NA	NA	NA	NA	NA	G	G	G	G	G	G	G	T	G	G	G	G	G	G	G	G	G	G	G	G	G	T	G	G	G	G	G	G	G	G	G	G	G	G	G	G	G	G	G
chr1H|HvGBSv2-6195_51993920+45	T/G	1	51993965	+	NA	NA	NA	NA	NA	NA	T	T	T	T	T	T	T	T	G	T	T	T	T	T	T	T	G	G	T	T	G	T	T	G	T	T	T	T	T	T	T	T	T	T	G	T	T	T	T
chr1H|HvGBSv2-6195_51993920+64	G/C	1	51993984	+	NA	NA	NA	NA	NA	NA	G	G	G	G	G	G	G	G	G	G	G	G	G	G	G	G	G	G	G	G	G	G	G	G	G	G	G	G	C	C	G	G	G	G	G	G	G	G	G
chr1H|HvGBSv2-6195_51993920+69	C/T	1	51993989	+	NA	NA	NA	NA	NA	NA	C	C	C	C	C	C	C	C	C	C	C	C	C	C	C	C	C	C	C	C	C	C	C	C	C	C	C	C	T	T	C	C	C	C	C	C	C	C	C
chr1H|HvGBSv2-6195_51993920+76	G/A	1	51993996	+	NA	NA	NA	NA	NA	NA	G	G	G	G	G	G	G	G	G	G	G	G	G	G	G	G	G	G	G	G	G	G	G	G	G	G	G	G	A	A	G	G	G	G	G	G	G	G	G
chr1H|HvGBSv2-110_52495199+51	G/T	1	52495250	+	NA	NA	NA	NA	NA	NA	G	G	G	G	G	G	G	G	G	G	G	G	G	G	G	G	G	G	G	G	G	G	G	G	G	G	G	G	G	G	G	T	T	G	G	G	G	G	G
chr1H|HvGBSv2-110_52495199+61	C/A	1	52495260	+	NA	NA	NA	NA	NA	NA	C	C	C	C	C	C	C	C	C	C	C	C	C	C	C	C	C	C	C	C	C	C	C	C	C	C	C	C	C	C	C	C	C	C	C	C	C	C	C
chr1H|HvGBSv2-110_52495199+137	A/G	1	52495336	+	NA	NA	NA	NA	NA	NA	A	A	A	A	A	A	A	A	A	A	A	A	A	A	A	A	A	A	A	A	A	A	A	A	A	A	A	A	A	A	A	A	A	A	A	A	A	A	A
chr1H|HvGBSv2-11616_52587989+4	T/C	1	52587993	+	NA	NA	NA	NA	NA	NA	T	T	T	T	T	T	T	T	T	T	T	T	T	T	T	T	T	T	T	T	T	T	T	T	T	T	T	T	T	T	T	T	T	T	T	T	T	T	T
chr1H|HvGBSv2-111_53442479+39	C/G	1	53442518	+	NA	NA	NA	NA	NA	NA	C	C	C	C	C	C	C	G	C	C	C	C	C	C	C	C	C	C	C	C	C	G	C	C	C	C	C	C	C	C	C	C	C	C	C	C	C	C	C
chr1H|HvGBSv2-111_53442479+50	G/C	1	53442529	+	NA	NA	NA	NA	NA	NA	G	G	G	G	G	G	G	C	G	G	G	G	G	G	G	G	G	G	G	G	G	C	G	G	G	G	G	G	G	G	G	G	G	G	G	G	G	G	G
chr1H|HvGBSv2-111_53442479+64	A/C	1	53442543	+	NA	NA	NA	NA	NA	NA	A	A	A	A	A	A	A	C	A	A	A	A	A	A	A	A	A	A	A	A	A	C	A	A	A	A	A	A	A	A	A	A	A	A	A	A	A	A	A
chr1H|HvGBSv2-111_53442479+128	A/T	1	53442607	+	NA	NA	NA	NA	NA	NA	A	A	A	A	A	A	A	T	A	A	A	A	A	A	A	A	A	A	A	A	A	T	A	A	A	A	A	A	A	A	A	A	A	A	A	A	A	A	A
chr1H|HvGBSv2-111_53442479+129	T/G	1	53442608	+	NA	NA	NA	NA	NA	NA	T	T	T	T	T	T	T	T	T	T	T	T	T	T	T	T	T	T	T	T	T	T	T	T	T	T	T	T	G	T	T	T	T	T	T	T	T	T	T
chr1H|HvGBSv2-111_53442479+140	A/G	1	53442619	+	NA	NA	NA	NA	NA	NA	A	A	A	A	A	A	A	A	G	A	A	A	A	A	A	A	G	G	A	A	G	A	G	G	A	A	A	A	A	A	A	A	A	A	G	A	A	A	A
chr1H|HvGBSv2-112_54475591+81	G/A	1	54475672	+	NA	NA	NA	NA	NA	NA	G	G	G	G	G	G	G	A	G	G	G	G	G	G	G	G	G	G	G	G	G	A	G	G	G	G	G	G	G	G	G	G	G	G	G	G	G	G	G
chr1H|HvGBSv2-112_54475591+138	A/G	1	54475729	+	NA	NA	NA	NA	NA	NA	A	A	A	A	A	A	A	A	A	A	A	A	A	A	A	A	A	A	A	A	A	A	A	A	A	A	A	A	A	A	A	A	A	A	A	A	A	A	A
chr1H|HvGBSv2-3491_55210740+45	A/G	1	55210785	+	NA	NA	NA	NA	NA	NA	A	A	G	G	A	A	A	A	A	A	A	A	A	A	A	G	A	A	A	A	A	A	A	A	A	A	A	A	G	A	A	A	A	A	A	A	A	G	A
chr1H|HvGBSv2-113_55492404+49	G/A	1	55492453	+	NA	NA	NA	NA	NA	NA	G	G	G	G	G	G	G	G	G	G	G	G	G	G	G	G	G	G	G	G	G	G	G	G	G	G	G	G	G	G	G	A	A	G	G	G	G	G	G
chr1H|HvGBSv2-113_55492404+77	T/C	1	55492481	+	NA	NA	NA	NA	NA	NA	T	T	T	T	T	T	T	T	T	T	T	T	T	T	T	T	T	T	T	T	T	T	T	T	T	T	T	T	C	T	T	T	T	T	T	T	T	T	T
chr1H|HvGBSv2-113_55492404+126	T/C	1	55492530	+	NA	NA	NA	NA	NA	NA	T	T	T	T	T	T	T	T	T	T	T	T	T	T	T	T	T	T	T	T	T	T	T	T	T	T	T	T	C	T	T	T	T	T	T	T	T	T	T
chr1H|HvGBSv2-113_55492404+169	A/G	1	55492573	+	NA	NA	NA	NA	NA	NA	A	A	A	A	A	A	A	A	A	A	A	A	A	A	A	A	A	A	A	A	A	A	A	A	A	A	A	A	G	A	A	A	A	A	A	A	A	A	A
chr1H|HvGBSv2-115_57499069+118	T/C	1	57499187	+	NA	NA	NA	NA	NA	NA	T	T	T	T	T	T	T	T	T	T	T	T	T	T	T	T	T	T	T	T	T	T	T	T	T	T	T	T	T	T	T	C	C	T	T	T	T	T	T
chr1H|HvGBSv2-4292_57720445+58	T/C	1	57720503	+	NA	NA	NA	NA	NA	NA	T	T	T	T	C	T	C	T	T	T	T	T	T	T	T	C	T	T	T	T	T	T	T	T	C	T	T	T	T	C	T	T	T	C	T	T	C	T	T
chr1H|HvGBSv2-116_58478667+52	A/G	1	58478719	+	NA	NA	NA	NA	NA	NA	A	A	A	A	G	A	A	A	A	A	A	A	A	A	A	A	A	A	A	A	A	A	A	A	G	A	A	A	A	A	A	A	A	G	A	A	A	A	A
chr1H|HvGBSv2-6202_58999759+8	T/A	1	58999767	+	NA	NA	NA	NA	NA	NA	T	T	T	A	T	T	T	T	T	T	T	T	T	T	T	T	T	T	T	T	T	T	T	T	W	T	T	T	T	T	T	T	T	T	T	T	T	T	T
chr1H|HvGBSv2-6202_58999759+18	T/C	1	58999777	+	NA	NA	NA	NA	NA	NA	T	T	T	T	T	T	T	T	T	T	T	T	T	T	T	T	T	T	T	T	T	T	T	T	T	T	T	T	T	T	T	T	T	T	T	T	T	T	T
chr1H|HvGBSv2-6202_58999759+24	T/A	1	58999783	+	NA	NA	NA	NA	NA	NA	T	T	T	A	T	T	T	T	T	T	T	T	T	T	T	T	T	T	T	T	T	T	T	T	T	T	T	T	T	T	T	T	T	T	T	T	T	T	T
chr1H|HvGBSv2-6202_58999759+55	G/C	1	58999814	+	NA	NA	NA	NA	NA	NA	G	G	G	G	G	G	G	G	G	G	G	G	G	G	G	G	G	G	G	G	G	G	G	G	G	G	G	G	G	G	G	G	G	G	G	G	G	G	G
chr1H|HvGBSv2-6202_58999759+109	C/G	1	58999868	+	NA	NA	NA	NA	NA	NA	C	C	C	C	C	C	C	C	C	C	C	C	C	C	C	C	C	C	C	C	C	G	C	C	C	C	C	C	G	C	C	C	C	C	C	C	G	G	C
chr1H|HvGBSv2-6202_58999759+113	A/C	1	58999872	+	NA	NA	NA	NA	NA	NA	A	A	A	A	A	A	A	A	A	A	A	A	A	A	A	A	A	A	A	A	A	C	A	A	A	A	A	A	C	A	A	A	A	A	A	A	C	C	A
chr1H|HvGBSv2-6202_58999759+144	T/A	1	58999903	+	NA	NA	NA	NA	NA	NA	T	T	T	T	T	T	T	T	T	T	T	T	T	T	T	T	T	T	T	T	T	T	T	T	A	T	T	T	T	A	T	A	A	A	T	T	T	T	A
chr1H|HvGBSv2-117_59516862+51	A/G	1	59516913	+	NA	NA	NA	NA	NA	NA	A	A	G	G	A	A	A	A	A	A	A	A	A	A	A	A	A	A	A	A	A	A	A	A	A	A	A	A	A	A	A	A	A	A	A	A	A	G	A
chr1H|HvGBSv2-117_59516862+108	A/G	1	59516970	+	NA	NA	NA	NA	NA	NA	A	A	A	A	G	G	G	G	A	G	A	A	A	G	A	A	A	A	G	G	A	G	A	A	A	G	G	A	A	A	A	A	A	A	A	A	G	A	A
chr1H|HvGBSv2-117_59516862+113	T/C	1	59516975	+	NA	NA	NA	NA	NA	NA	T	C	T	T	T	T	T	T	T	T	T	C	C	T	C	C	T	T	T	T	T	T	T	C	C	T	T	C	C	C	C	C	C	C	T	C	T	T	C
chr1H|HvGBSv2-117_59516862+147	C/A	1	59517009	+	NA	NA	NA	NA	NA	NA	C	A	C	C	C	C	C	C	C	C	C	A	A	C	A	A	C	C	C	C	C	C	C	A	A	C	C	A	A	A	A	A	A	A	C	A	C	C	A
chr1H|HvGBSv2-6204_61118920+9	T/C	1	61118929	+	NA	NA	NA	NA	NA	NA	T	T	T	T	T	T	T	T	C	T	T	T	T	T	T	T	C	C	T	T	C	T	C	C	T	T	T	T	T	T	T	T	T	T	C	T	T	T	T
chr1H|HvGBSv2-6204_61118920+34	A/G	1	61118954	+	NA	NA	NA	NA	NA	NA	A	G	A	A	A	A	A	A	A	A	A	G	G	A	A	A	A	A	A	A	A	A	A	A	G	A	A	A	A	G	A	A	A	G	A	G	A	A	G
chr1H|HvGBSv2-6205_61991510+4	T/C	1	61991514	+	NA	NA	NA	NA	NA	NA	T	T	T	T	T	T	T	T	T	T	T	T	T	T	T	T	T	T	T	T	T	T	T	T	T	T	T	T	T	T	T	T	T	T	T	T	T	T	T
chr1H|HvGBSv2-6205_61991510+73	G/A	1	61991583	+	NA	NA	NA	NA	NA	NA	G	G	G	G	G	G	G	G	G	G	G	G	G	G	G	G	G	G	G	G	G	G	G	G	G	G	G	G	G	G	G	G	G	G	G	G	G	G	G
chr1H|HvGBSv2-6205_61991510+102	A/G	1	61991612	+	NA	NA	NA	NA	NA	NA	A	A	G	G	G	G	G	A	A	A	G	A	A	G	A	A	A	A	G	A	A	A	A	A	A	G	G	A	A	A	A	A	A	A	A	A	A	A	A
chr1H|HvGBSv2-6205_61991510+116	G/A	1	61991626	+	NA	NA	NA	NA	NA	NA	G	A	A	A	A	A	A	G	G	G	A	A	A	A	A	G	G	G	A	G	G	A	G	G	A	A	A	A	G	G	A	A	A	A	G	A	G	A	A
chr1H|HvGBSv2-6205_61991510+131	A/T	1	61991641	+	NA	NA	NA	NA	NA	NA	A	A	A	A	A	A	A	A	A	A	A	A	A	A	T	A	A	A	A	A	A	A	A	A	A	A	A	T	A	A	T	T	T	A	A	A	A	T	A
chr1H|HvGBSv2-120_62500535+19	A/T	1	62500554	+	NA	NA	NA	NA	NA	NA	A	A	T	T	T	T	T	A	A	A	T	A	A	T	A	A	A	A	T	A	A	A	A	A	A	T	T	A	A	A	A	A	A	A	A	A	A	A	A
chr1H|HvGBSv2-120_62500535+20	T/A	1	62500555	+	NA	NA	NA	NA	NA	NA	T	T	A	A	A	A	A	T	T	T	A	T	T	A	T	T	T	T	A	T	T	T	T	T	T	A	A	T	T	T	T	T	T	T	T	T	T	T	T
chr1H|HvGBSv2-120_62500535+55	C/G	1	62500590	+	NA	NA	NA	NA	NA	NA	C	C	C	C	C	C	C	C	C	C	C	C	C	C	G	C	C	C	C	C	C	G	C	C	C	C	C	G	C	C	G	G	G	C	C	C	C	G	C
chr1H|HvGBSv2-120_62500535+115	A/G	1	62500650	+	NA	NA	NA	NA	NA	NA	A	A	G	G	G	G	G	A	A	A	G	A	A	G	A	A	A	A	G	A	A	A	A	A	A	G	G	A	A	A	A	A	A	A	A	A	A	A	A
chr1H|HvGBSv2-6206_62984625+95	A/G	1	62984720	+	NA	NA	NA	NA	NA	NA	A	G	G	G	G	G	G	A	A	A	G	G	G	G	G	A	A	A	G	A	A	G	A	A	G	G	G	G	A	A	G	G	G	G	A	G	A	G	A
chr1H|HvGBSv2-774_63093835+8	T/C	1	63093843	+	NA	NA	NA	NA	NA	NA	T	T	T	T	T	T	T	T	T	T	T	T	T	T	T	T	T	T	T	T	T	T	T	T	T	T	T	T	T	T	T	T	T	T	T	T	T	T	T
chr1H|HvGBSv2-774_63093835+15	A/G	1	63093850	+	NA	NA	NA	NA	NA	NA	A	A	A	A	A	A	A	A	A	A	A	A	G	A	A	A	A	A	A	A	A	A	A	A	A	A	A	G	A	A	G	A	A	A	A	G	A	A	G
chr1H|HvGBSv2-774_63093835+25	C/A	1	63093860	+	NA	NA	NA	NA	NA	NA	C	C	C	C	C	C	C	C	C	C	C	C	C	C	C	M	C	C	C	A	C	C	C	C	C	C	M	C	C	C	C	C	C	C	C	C	C	C	C
chr1H|HvGBSv2-774_63093835+54	G/A	1	63093889	+	NA	NA	NA	NA	NA	NA	G	G	G	G	G	G	G	G	G	G	G	G	A	G	G	G	G	G	G	G	G	G	G	G	G	G	G	A	G	G	A	G	G	G	G	A	G	G	A
chr1H|HvGBSv2-774_63093835+62	A/G	1	63093897	+	NA	NA	NA	NA	NA	NA	A	A	A	A	A	A	A	A	A	A	A	A	G	A	A	A	A	A	A	A	A	A	A	A	A	A	A	G	A	A	G	A	A	A	A	G	A	A	G
chr1H|HvGBSv2-774_63093835+77	T/A	1	63093912	+	NA	NA	NA	NA	NA	NA	T	T	T	W	T	T	T	T	T	T	T	T	T	T	T	T	T	T	T	T	T	T	T	T	T	T	T	T	T	T	T	T	T	T	T	T	T	T	T
chr1H|HvGBSv2-774_63093835+89	A/T	1	63093924	+	NA	NA	NA	NA	NA	NA	A	A	A	A	A	A	A	A	A	A	A	A	A	A	A	A	A	A	A	A	A	A	A	A	A	A	A	A	A	A	A	T	A	A	A	A	A	A	A
chr1H|HvGBSv2-774_63093835+119	T/C	1	63093954	+	NA	NA	NA	NA	NA	NA	T	T	T	Y	T	T	T	T	T	T	T	T	T	T	T	T	T	T	T	T	T	T	T	T	T	T	T	T	T	T	T	T	T	T	T	T	T	T	T
chr1H|HvGBSv2-774_63093835+130	A/G	1	63093965	+	NA	NA	NA	NA	NA	NA	A	A	A	R	A	A	A	A	A	A	A	A	A	A	A	A	A	A	A	A	A	A	A	A	A	A	A	A	A	A	A	A	A	A	A	A	A	A	A
chr1H|HvGBSv2-774_63093835+131	A/G	1	63093966	+	NA	NA	NA	NA	NA	NA	A	A	A	A	A	A	A	A	A	A	A	A	G	A	A	A	A	A	A	A	A	A	A	A	A	A	A	G	A	A	G	A	A	A	A	G	A	A	G
chr1H|HvGBSv2-774_63093835+133	A/G	1	63093968	+	NA	NA	NA	NA	NA	NA	A	A	A	A	A	A	A	A	A	A	A	A	A	A	A	R	A	A	A	G	A	A	A	A	A	A	R	A	A	A	A	A	A	A	A	A	A	A	A
chr1H|HvGBSv2-774_63093835+136	G/A	1	63093971	+	NA	NA	NA	NA	NA	NA	G	G	G	G	G	G	G	G	G	G	G	G	G	G	G	G	G	G	G	G	G	G	G	G	G	G	G	G	G	G	G	A	G	G	G	G	G	G	G
chr1H|HvGBSv2-774_63093835+145	C/G	1	63093980	+	NA	NA	NA	NA	NA	NA	C	C	C	S	C	C	C	C	C	C	C	C	C	C	C	C	C	C	C	C	C	C	C	C	C	C	C	C	C	C	C	C	C	C	C	C	C	C	C
chr1H|HvGBSv2-774_63093835+156	T/C	1	63093991	+	NA	NA	NA	NA	NA	NA	T	T	T	T	T	T	T	T	T	T	T	T	C	T	T	T	T	T	T	T	T	T	T	T	T	T	T	C	T	T	C	T	T	T	T	C	T	T	C
chr1H|HvGBSv2-774_63093835+159	C/A	1	63093994	+	NA	NA	NA	NA	NA	NA	C	C	C	M	C	C	C	C	C	C	C	C	C	C	C	C	C	C	C	C	C	C	C	C	C	C	C	C	C	C	C	C	C	C	C	C	C	C	C
chr1H|HvGBSv2-774_63093835+161	A/G	1	63093996	+	NA	NA	NA	NA	NA	NA	A	G	A	A	R	R	G	A	A	G	A	G	G	A	A	A	G	G	R	G	G	A	A	A	A	G	A	G	R	A	G	A	A	G	A	G	G	A	G
chr1H|HvGBSv2-774_63093835+167	G/C	1	63094002	+	NA	NA	NA	NA	NA	NA	G	G	G	G	G	G	G	G	G	G	G	G	C	G	G	G	G	G	G	G	G	G	G	G	G	G	G	C	G	G	C	G	G	G	G	C	G	G	C
chr1H|HvGBSv2-6207_64113797+103	A/G	1	64113900	+	NA	NA	NA	NA	NA	NA	G	A	A	A	A	A	A	A	G	A	A	A	A	A	A	A	G	G	A	A	G	A	G	G	A	A	A	A	A	A	A	A	A	A	G	A	A	A	G
chr1H|HvGBSv2-6207_64113797+104	T/C	1	64113901	+	NA	NA	NA	NA	NA	NA	C	T	T	T	T	T	T	T	C	T	T	T	T	T	T	T	C	C	T	T	C	T	C	C	T	T	T	T	T	T	T	T	T	T	C	T	T	T	C
chr1H|HvGBSv2-122_64492850+103	T/C	1	64492953	+	NA	NA	NA	NA	NA	NA	T	T	C	C	C	C	C	T	T	T	C	T	T	C	T	T	T	T	C	T	T	T	T	T	T	C	C	T	T	T	T	T	T	T	T	T	T	T	T
chr1H|HvGBSv2-6208_64992087+29	T/C	1	64992116	+	NA	NA	NA	NA	NA	NA	T	C	T	T	T	T	T	T	T	T	T	C	C	T	T	T	T	T	T	T	T	T	T	T	C	T	T	T	T	T	T	T	T	C	T	C	T	T	T
chr1H|HvGBSv2-6208_64992087+54	G/A	1	64992141	+	NA	NA	NA	NA	NA	NA	G	A	A	A	A	A	A	G	G	G	A	A	A	A	A	G	G	G	A	G	G	G	G	G	A	A	A	A	G	G	A	A	A	A	G	A	G	A	G
chr1H|HvGBSv2-6208_64992087+115	A/G	1	64992202	+	NA	NA	NA	NA	NA	NA	A	A	G	G	G	G	G	A	A	A	G	A	A	G	A	A	A	A	G	A	A	A	A	A	A	G	G	A	A	A	A	A	A	A	A	A	A	A	A
chr1H|HvGBSv2-6208_64992087+125	A/G	1	64992212	+	NA	NA	NA	NA	NA	NA	A	G	A	A	A	A	A	A	A	A	A	G	G	A	A	A	A	A	A	A	A	A	A	A	G	A	A	A	A	A	A	A	A	G	A	G	A	A	A
chr1H|HvGBSv2-6208_64992087+155	G/C	1	64992242	+	NA	NA	NA	NA	NA	NA	G	G	G	G	G	G	G	G	G	G	G	G	G	G	G	G	G	G	G	G	G	G	G	G	G	G	G	G	G	G	G	G	G	G	G	G	G	G	G
chr1H|HvGBSv2-123_65494451+180	C/A	1	65494631	+	NA	NA	NA	NA	NA	NA	C	C	C	C	C	C	C	C	C	C	C	C	C	C	A	C	C	C	C	C	C	C	C	C	C	C	C	A	C	C	A	A	A	C	C	C	C	A	C
chr1H|HvGBSv2-7792_65976890+8	T/C	1	65976898	+	NA	NA	NA	NA	NA	NA	T	C	T	T	T	T	T	T	T	T	T	C	C	T	T	T	T	T	T	T	T	T	T	T	C	T	T	T	T	T	T	T	T	C	T	C	T	T	T
chr1H|HvGBSv2-7792_65976890+33	T/C	1	65976923	+	NA	NA	NA	NA	NA	NA	T	T	T	T	T	T	T	T	T	T	T	T	T	T	C	T	T	T	T	T	T	T	T	T	T	T	T	C	T	T	C	C	C	T	T	T	T	C	T
chr1H|HvGBSv2-6210_66994156+26	C/T	1	66994182	+	NA	NA	NA	NA	NA	NA	C	C	C	T	C	C	C	C	C	C	C	C	C	C	T	C	C	C	C	C	C	T	C	C	C	C	C	T	C	C	T	T	T	C	C	C	C	T	C
chr1H|HvGBSv2-125_67508937+98	A/G	1	67509035	+	NA	NA	NA	NA	NA	NA	A	A	G	G	G	G	G	A	A	A	G	A	A	G	A	A	A	A	G	A	A	A	A	A	A	G	G	A	A	A	A	A	A	A	A	A	A	A	A
chr1H|HvGBSv2-125_67508937+159	T/C	1	67509096	+	NA	NA	NA	NA	NA	NA	T	T	C	T	T	T	T	C	T	T	T	T	T	T	C	T	T	T	T	T	T	T	T	T	T	T	T	C	T	T	C	C	C	T	T	T	C	C	T
chr1H|HvGBSv2-6211_68015892+148	A/T	1	68016040	+	NA	NA	NA	NA	NA	NA	A	A	A	A	A	A	A	A	A	A	A	A	A	A	T	A	A	A	A	A	A	A	A	A	A	A	A	T	A	A	T	T	T	A	A	A	A	T	A
chr1H|HvGBSv2-6212_68982335+25	C/T	1	68982360	+	NA	NA	NA	NA	NA	NA	C	C	C	C	C	C	C	T	C	C	C	C	C	C	C	C	C	C	C	C	C	C	C	C	C	C	C	C	C	C	C	C	C	C	C	C	T	C	C
chr1H|HvGBSv2-6212_68982335+44	G/A	1	68982379	+	NA	NA	NA	NA	NA	NA	G	G	G	G	G	G	G	G	G	G	G	G	G	G	A	G	G	G	G	G	G	G	G	G	G	G	G	A	G	G	A	A	A	G	G	G	G	A	G
chr1H|HvGBSv2-6212_68982335+148	T/C	1	68982483	+	NA	NA	NA	NA	NA	NA	T	T	T	T	T	T	T	C	T	T	T	T	T	T	T	T	T	T	T	T	T	T	T	T	T	T	T	T	T	T	T	T	T	T	T	T	C	T	T
chr1H|HvGBSv2-6213_69960440+9	G/A	1	69960449	+	NA	NA	NA	NA	NA	NA	G	A	A	A	A	A	A	A	G	G	A	A	A	A	A	A	G	G	A	G	G	A	G	G	A	A	A	A	G	G	A	A	A	A	G	A	A	A	A
chr1H|HvGBSv2-128_70507715+63	A/G	1	70507778	+	NA	NA	NA	NA	NA	NA	A	A	A	A	A	A	A	A	A	A	A	A	A	A	A	A	A	A	A	A	A	G	A	A	A	A	A	A	A	A	A	A	A	A	A	A	A	A	A
chr1H|HvGBSv2-128_70507715+71	C/A	1	70507786	+	NA	NA	NA	NA	NA	NA	C	A	A	A	A	A	A	C	C	C	A	A	A	A	A	C	C	C	A	C	C	C	C	C	A	A	A	A	C	C	A	A	A	A	C	A	C	A	A
chr1H|HvGBSv2-128_70507715+76	A/C	1	70507791	+	NA	NA	NA	NA	NA	NA	A	C	A	A	A	A	A	A	A	A	A	C	C	A	C	A	A	A	A	A	A	A	A	A	C	A	A	C	A	A	C	C	C	C	A	C	A	C	C
chr1H|HvGBSv2-128_70507715+87	T/A	1	70507802	+	NA	NA	NA	NA	NA	NA	T	A	A	A	A	A	A	T	T	T	A	A	A	A	A	A	T	T	A	T	T	T	T	T	A	A	A	A	T	T	A	A	A	A	T	A	T	A	A
chr1H|HvGBSv2-128_70507715+114	T/C	1	70507829	+	NA	NA	NA	NA	NA	NA	T	T	C	C	C	C	C	T	T	T	C	T	T	C	T	T	T	T	C	T	T	T	T	T	T	C	C	T	T	T	T	T	T	T	T	T	T	T	T
chr1H|HvGBSv2-128_70507715+116	C/A	1	70507831	+	NA	NA	NA	NA	NA	NA	C	A	A	A	A	A	A	C	C	C	A	A	A	A	A	C	C	C	A	C	C	C	C	C	A	A	A	A	C	C	A	A	A	A	C	A	C	A	A
chr1H|HvGBSv2-128_70507715+144	A/G	1	70507859	+	NA	NA	NA	NA	NA	NA	A	A	A	A	A	A	A	A	A	A	A	G	A	A	A	A	A	A	A	A	A	A	A	A	G	A	A	A	A	A	A	A	A	G	A	A	A	A	A
chr1H|HvGBSv2-128_70507715+150	A/G	1	70507865	+	NA	NA	NA	NA	NA	NA	A	A	A	A	A	A	A	A	A	A	A	A	A	A	A	G	A	A	A	A	A	A	A	A	A	A	A	A	A	A	A	A	A	A	A	A	A	A	A
chr1H|HvGBSv2-6214_70984756+88	A/G	1	70984844	+	NA	NA	NA	NA	NA	NA	A	G	G	G	G	G	G	A	A	A	G	G	G	G	G	A	A	A	G	A	A	A	A	A	G	G	G	G	A	A	G	G	G	G	A	G	A	G	G
chr1H|HvGBSv2-6214_70984756+104	C/T	1	70984860	+	NA	NA	NA	NA	NA	NA	C	T	T	T	T	T	T	C	C	C	T	T	T	T	T	C	C	C	T	C	C	C	C	C	T	T	T	T	C	C	T	T	T	T	C	T	C	T	T
chr1H|HvGBSv2-6215_71994167+8	T/C	1	71994175	+	NA	NA	NA	NA	NA	NA	T	T	T	T	T	T	T	T	T	T	T	T	T	T	T	T	T	T	T	T	T	T	T	T	T	T	T	T	T	T	T	T	T	T	T	T	T	T	T
chr1H|HvGBSv2-6215_71994167+156	G/A	1	71994323	+	NA	NA	NA	NA	NA	NA	G	A	A	A	A	A	A	G	G	G	A	A	A	A	A	G	G	G	A	G	G	A	G	G	A	A	A	A	G	G	A	A	A	A	G	A	G	A	A
chr1H|HvGBSv2-6216_73001673+40	T/G	1	73001713	+	NA	NA	NA	NA	NA	NA	T	T	T	T	T	T	T	T	T	T	T	T	T	T	T	G	T	T	T	T	T	T	T	T	T	T	T	T	T	T	T	T	T	T	T	T	T	T	T
chr1H|HvGBSv2-6216_73001673+95	T/G	1	73001768	+	NA	NA	NA	NA	NA	NA	T	T	T	T	T	T	T	T	T	T	T	T	T	T	T	T	T	T	T	T	T	T	T	T	T	T	T	T	T	T	T	T	T	T	T	T	T	T	T
chr1H|HvGBSv2-6216_73001673+96	C/T	1	73001769	+	NA	NA	NA	NA	NA	NA	C	T	C	C	C	C	C	C	C	C	C	T	T	C	C	C	C	C	C	C	C	C	C	C	T	C	C	C	C	C	C	C	C	T	C	T	C	C	T
chr1H|HvGBSv2-6216_73001673+104	T/C	1	73001777	+	NA	NA	NA	NA	NA	NA	T	T	T	T	T	T	T	T	T	T	T	T	T	T	C	T	T	T	T	T	T	T	T	T	T	T	T	C	T	T	C	C	C	T	T	T	T	C	T
chr1H|HvGBSv2-6216_73001673+107	A/G	1	73001780	+	NA	NA	NA	NA	NA	NA	A	A	G	G	G	G	G	A	A	A	G	A	A	G	A	A	A	A	G	A	A	A	A	A	A	G	G	A	A	A	A	A	A	A	A	A	A	A	A
chr1H|HvGBSv2-6216_73001673+143	A/G	1	73001816	+	NA	NA	NA	NA	NA	NA	A	A	A	A	A	A	A	A	A	A	A	A	A	A	A	A	A	A	A	A	A	A	A	A	A	A	A	A	A	A	A	A	A	A	A	A	A	A	A
chr1H|HvGBSv2-6217_74000892+52	A/T	1	74000944	+	NA	NA	NA	NA	NA	NA	A	A	A	A	A	A	A	A	A	A	A	T	T	A	T	A	A	A	A	A	A	A	A	A	T	A	A	T	A	A	T	T	T	T	A	T	A	A	T
chr1H|HvGBSv2-6217_74000892+97	T/C	1	74000989	+	NA	NA	NA	NA	NA	NA	T	T	T	T	T	T	T	T	T	T	T	C	C	T	T	T	T	T	T	T	T	T	T	T	C	T	T	T	T	T	T	T	T	C	T	C	T	T	C
chr1H|HvGBSv2-132_74327654+88	C/T	1	74327742	+	NA	NA	NA	NA	NA	NA	C	C	C	C	C	C	C	C	C	C	C	T	T	C	T	C	C	C	C	C	C	C	C	C	T	C	C	T	C	C	T	T	T	T	C	T	C	C	T
chr1H|HvGBSv2-11935_74490530+4	T/C	1	74490534	+	NA	NA	NA	NA	NA	NA	T	T	T	T	T	T	T	T	T	T	T	T	Y	T	T	T	T	T	T	T	T	T	T	T	T	T	T	T	T	T	T	T	T	T	T	T	T	T	Y
chr1H|HvGBSv2-11935_74490530+9	A/G	1	74490539	+	NA	NA	NA	NA	NA	NA	A	A	A	A	A	A	A	A	A	A	A	A	R	A	A	A	A	A	A	A	A	A	A	A	A	A	A	A	A	A	A	A	A	A	A	A	A	A	R
chr1H|HvGBSv2-11935_74490530+17	T/C	1	74490547	+	NA	NA	NA	NA	NA	NA	T	T	T	T	T	T	T	T	T	T	T	T	Y	T	T	T	T	T	T	T	T	T	T	T	T	T	T	T	T	T	T	T	T	T	T	T	T	T	Y
chr1H|HvGBSv2-11935_74490530+53	T/G	1	74490583	+	NA	NA	NA	NA	NA	NA	T	T	T	T	T	T	T	T	T	T	T	T	K	T	T	T	T	T	T	T	T	T	T	T	T	T	T	T	T	T	T	T	T	T	T	T	T	T	K
chr1H|HvGBSv2-11935_74490530+59	A/C	1	74490589	+	NA	NA	NA	NA	NA	NA	A	A	A	A	A	A	A	A	A	A	A	A	M	A	A	A	A	A	A	A	A	A	A	A	A	A	A	A	A	A	A	A	A	A	A	A	A	A	M
chr1H|HvGBSv2-11935_74490530+68	A/G	1	74490598	+	NA	NA	NA	NA	NA	NA	A	A	A	A	A	A	A	A	A	A	A	A	R	A	A	A	A	A	A	A	A	A	A	A	A	A	A	A	A	A	A	A	A	A	A	A	A	A	R
chr1H|HvGBSv2-11935_74490530+70	T/C	1	74490600	+	NA	NA	NA	NA	NA	NA	T	T	T	T	T	T	T	T	T	T	T	T	Y	T	T	T	T	T	T	T	T	T	T	T	T	T	T	T	T	T	T	T	T	T	T	T	T	T	Y
chr1H|HvGBSv2-11935_74490530+81	T/C	1	74490611	+	NA	NA	NA	NA	NA	NA	T	T	T	T	T	T	T	T	T	T	T	T	Y	T	T	T	T	T	T	T	T	T	T	T	T	T	T	T	T	T	T	T	T	T	T	T	T	T	Y
chr1H|HvGBSv2-11935_74490530+86	T/C	1	74490616	+	NA	NA	NA	NA	NA	NA	T	T	T	T	T	T	T	T	T	T	T	T	T	T	T	T	T	T	T	T	T	T	T	T	T	T	T	T	T	T	T	T	T	T	T	T	T	T	T
chr1H|HvGBSv2-11935_74490530+89	G/A	1	74490619	+	NA	NA	NA	NA	NA	NA	G	G	G	G	G	G	G	G	G	G	G	G	R	G	G	G	G	G	G	G	G	G	G	G	G	G	G	G	G	G	G	G	G	G	G	G	G	G	R
chr1H|HvGBSv2-11935_74490530+109	A/G	1	74490639	+	NA	NA	NA	NA	NA	NA	A	A	A	A	A	A	A	A	A	A	A	A	A	A	A	A	A	A	A	A	A	A	A	A	A	A	A	A	A	A	A	A	A	A	A	A	A	A	A
chr1H|HvGBSv2-11935_74490530+112	G/A	1	74490642	+	NA	NA	NA	NA	NA	NA	G	G	G	G	G	G	G	G	G	G	G	G	R	G	G	G	G	G	G	G	G	G	G	G	G	G	G	G	G	G	G	G	G	G	G	G	G	G	R
chr1H|HvGBSv2-11935_74490530+117	C/T	1	74490647	+	NA	NA	NA	NA	NA	NA	C	C	C	C	C	C	C	C	C	C	C	C	Y	C	C	C	C	C	C	C	C	C	C	C	C	C	C	C	C	C	C	C	C	C	C	C	C	C	Y
chr1H|HvGBSv2-11935_74490530+120	G/C	1	74490650	+	NA	NA	NA	NA	NA	NA	G	G	G	G	G	G	G	G	G	G	G	G	S	G	G	G	G	G	G	G	G	G	G	G	G	G	G	G	G	G	G	G	G	G	G	G	G	G	S
chr1H|HvGBSv2-11935_74490530+124	A/G	1	74490654	+	NA	NA	NA	NA	NA	NA	A	A	A	A	A	A	A	A	A	A	A	A	R	A	A	A	A	A	A	A	A	A	A	A	A	A	A	A	A	A	A	A	A	A	A	A	A	A	R
chr1H|HvGBSv2-11935_74490530+125	T/C	1	74490655	+	NA	NA	NA	NA	NA	NA	T	T	T	T	T	T	T	T	T	T	T	T	Y	T	T	T	T	T	T	T	T	T	T	T	T	T	T	T	T	T	T	T	T	T	T	T	T	T	Y
chr1H|HvGBSv2-11935_74490530+152	T/A	1	74490682	+	NA	NA	NA	NA	NA	NA	T	T	T	T	T	T	T	T	T	T	T	T	W	T	T	T	T	T	T	T	T	T	T	T	T	T	T	T	T	T	T	T	T	T	T	T	T	T	W
chr1H|HvGBSv2-133_75394232+2	A/G	1	75394234	+	NA	NA	NA	NA	NA	NA	A	A	A	A	A	A	A	G	A	A	A	G	G	A	G	A	A	A	A	A	A	A	A	A	G	A	A	A	G	G	A	G	G	G	A	A	A	A	G
chr1H|HvGBSv2-133_75394232+177	A/G	1	75394409	+	NA	NA	NA	NA	NA	NA	A	A	A	A	A	A	A	G	A	A	A	G	G	A	G	A	A	A	A	A	A	A	A	A	G	A	A	A	G	G	A	G	G	G	A	A	A	A	G
chr1H|HvGBSv2-6219_76009970+44	A/G	1	76010014	+	NA	NA	NA	NA	NA	NA	A	A	A	A	A	A	A	A	A	A	A	A	A	A	A	A	A	A	A	A	A	G	A	A	A	A	A	A	A	A	A	A	A	A	A	A	A	A	A
chr1H|HvGBSv2-6219_76009970+61	T/G	1	76010031	+	NA	NA	NA	NA	NA	NA	T	T	T	T	T	T	T	G	T	T	T	G	G	T	G	T	T	T	T	T	T	T	T	T	G	T	T	T	G	G	T	G	G	G	T	T	T	T	G
chr1H|HvGBSv2-6219_76009970+100	A/G	1	76010070	+	NA	NA	NA	NA	NA	NA	A	A	A	A	A	A	A	G	A	A	A	G	G	A	G	A	A	A	A	A	A	A	A	A	G	A	A	A	G	G	A	G	G	G	A	A	A	A	G
chr1H|HvGBSv2-6219_76009970+164	A/C	1	76010134	+	NA	NA	NA	NA	NA	NA	A	A	A	A	C	A	C	A	A	C	A	A	A	C	A	A	A	A	C	C	A	A	A	A	A	A	A	A	A	A	A	A	A	A	A	A	A	A	A
chr1H|HvGBSv2-134_77498880+41	C/G	1	77498921	+	NA	NA	NA	NA	NA	NA	C	C	C	C	C	C	C	C	C	C	C	G	G	C	G	C	C	C	C	C	C	C	C	C	G	C	C	C	C	C	C	C	C	G	C	C	C	C	G
chr1H|HvGBSv2-134_77498880+107	G/A	1	77498987	+	NA	NA	NA	NA	NA	NA	G	G	G	G	G	G	G	A	G	G	G	A	A	G	A	G	G	G	G	G	G	A	G	G	A	G	G	G	A	A	G	A	A	A	G	G	G	G	A
chr1H|HvGBSv2-134_77498880+131	G/T	1	77499011	+	NA	NA	NA	NA	NA	NA	G	G	G	G	T	G	T	G	G	T	G	G	G	T	G	T	G	G	T	T	G	G	G	G	G	G	G	G	G	G	G	G	G	G	G	G	G	G	G
chr1H|HvGBSv2-6221_77999479+75	A/G	1	77999554	+	NA	NA	NA	NA	NA	NA	A	A	A	A	A	A	A	G	A	A	A	A	A	A	A	A	A	A	A	A	A	G	A	A	A	A	A	A	G	G	A	G	G	A	A	A	A	A	A
chr1H|HvGBSv2-6221_77999479+78	C/A	1	77999557	+	NA	NA	NA	NA	NA	NA	C	C	C	C	C	C	C	A	C	C	C	A	A	C	A	C	C	C	C	C	C	A	C	C	A	C	C	C	A	A	C	A	A	A	C	C	C	C	A
chr1H|HvGBSv2-135_78501165+149	C/T	1	78501314	+	NA	NA	NA	NA	NA	NA	C	C	C	C	C	C	C	T	C	C	C	T	T	C	T	C	C	C	C	C	C	T	C	C	T	C	C	C	T	T	C	T	T	T	C	C	C	C	T
chr1H|HvGBSv2-136_79491540+15	A/G	1	79491555	+	NA	NA	NA	NA	NA	NA	A	A	G	G	A	A	A	A	A	A	A	A	A	A	A	A	A	A	A	A	A	G	A	A	A	A	A	A	A	A	A	A	A	A	A	A	A	A	A
chr1H|HvGBSv2-136_79491540+38	C/G	1	79491578	+	NA	NA	NA	NA	NA	NA	C	C	G	G	C	C	C	G	C	C	C	G	G	C	G	C	C	C	C	C	C	G	C	C	G	C	C	C	G	G	C	G	G	G	C	C	C	G	G
chr1H|HvGBSv2-136_79491540+81	G/A	1	79491621	+	NA	NA	NA	NA	NA	NA	G	G	A	A	G	G	G	A	G	G	G	A	A	G	A	G	G	G	G	G	G	A	G	G	A	G	G	G	A	A	G	A	A	A	G	G	G	A	A
chr1H|HvGBSv2-136_79491540+109	C/G	1	79491649	+	NA	NA	NA	NA	NA	NA	C	C	G	G	C	C	C	C	C	C	C	C	C	C	C	C	C	C	C	C	C	G	C	C	C	C	C	C	C	C	C	C	C	C	C	C	C	C	C
chr1H|HvGBSv2-136_79491540+139	T/C	1	79491679	+	NA	NA	NA	NA	NA	NA	T	T	C	C	T	T	T	T	T	T	T	T	T	T	T	T	T	T	T	T	T	C	T	T	T	T	T	T	T	T	T	T	T	T	T	T	T	T	T
chr1H|HvGBSv2-136_79491540+159	G/A	1	79491699	+	NA	NA	NA	NA	NA	NA	G	G	A	A	G	G	G	G	G	G	G	G	G	G	G	G	G	G	G	G	G	A	G	G	G	G	G	G	G	G	G	G	G	G	G	G	G	G	G
chr1H|HvGBSv2-139_82498429+83	G/T	1	82498512	+	NA	NA	NA	NA	NA	NA	G	G	T	T	G	G	G	T	G	G	G	T	T	G	T	G	G	G	G	G	G	T	G	G	T	G	G	G	T	T	G	T	T	T	G	G	G	T	T
chr1H|HvGBSv2-139_82498429+174	C/A	1	82498603	+	NA	NA	NA	NA	NA	NA	C	C	A	A	C	C	C	A	C	C	C	A	A	C	A	C	C	C	C	C	C	A	C	C	A	C	C	C	A	A	C	A	A	A	C	C	C	A	A
chr1H|HvGBSv2-140_83489984+115	T/A	1	83490099	+	NA	NA	NA	NA	NA	NA	T	T	A	A	T	T	T	A	T	T	T	A	A	T	A	T	T	T	T	T	T	A	T	T	A	T	T	T	A	A	T	A	A	A	T	T	T	A	A
chr1H|HvGBSv2-6227_83999875+139	C/T	1	84000014	+	NA	NA	NA	NA	NA	NA	C	C	T	T	C	C	C	T	C	C	C	T	T	C	T	C	C	C	C	C	C	T	C	C	T	C	C	C	T	T	C	T	T	T	C	C	C	T	T
chr1H|HvGBSv2-6228_84999078+47	A/C	1	84999125	+	NA	NA	NA	NA	NA	NA	A	A	C	A	A	A	A	C	A	A	A	C	C	A	C	A	A	A	A	A	A	C	A	A	C	A	A	A	C	C	A	C	C	C	A	A	A	A	C
chr1H|HvGBSv2-6228_84999078+176	G/T	1	84999254	+	NA	NA	NA	NA	NA	NA	G	G	G	G	T	G	T	G	G	T	G	G	G	T	G	G	G	G	T	T	G	G	G	G	G	G	G	G	G	G	G	G	G	G	G	G	G	G	G
chr1H|HvGBSv2-8771_85853888+181	A/C	1	85854069	+	NA	NA	NA	NA	NA	NA	A	A	A	A	A	C	A	A	A	A	A	A	A	A	A	A	A	A	A	A	A	C	A	A	A	A	A	A	A	A	M	A	A	A	A	A	A	A	A
chr1H|HvGBSv2-6229_86046311+73	T/C	1	86046384	+	NA	NA	NA	NA	NA	NA	T	T	C	C	T	T	T	C	T	T	T	C	C	T	C	T	T	T	T	T	T	C	T	T	C	T	T	T	T	T	T	C	C	C	T	T	T	T	C
chr1H|HvGBSv2-6230_87031722+92	T/C	1	87031814	+	NA	NA	NA	NA	NA	NA	T	T	C	C	T	T	T	T	T	T	T	T	T	T	T	T	T	T	T	T	T	C	T	T	T	T	T	T	T	T	T	T	T	T	T	T	T	C	T
chr1H|HvGBSv2-6230_87031722+179	A/G	1	87031901	+	NA	NA	NA	NA	NA	NA	G	G	A	A	A	G	A	A	A	A	G	A	A	A	A	G	A	A	A	A	A	A	A	A	A	G	G	G	G	A	G	A	A	A	A	G	G	A	G
chr1H|HvGBSv2-143_87502007+17	T/G	1	87502024	+	NA	NA	NA	NA	NA	NA	T	T	G	G	T	T	T	T	T	T	T	T	T	T	T	T	T	T	T	T	T	G	T	T	T	T	T	T	T	T	T	T	T	T	T	T	T	G	T
chr1H|HvGBSv2-143_87502007+31	C/T	1	87502038	+	NA	NA	NA	NA	NA	NA	C	C	C	C	C	C	C	T	C	C	C	T	T	C	T	C	C	C	C	C	C	C	C	C	T	C	C	C	C	C	C	T	T	T	C	C	C	C	C
chr1H|HvGBSv2-143_87502007+88	T/C	1	87502095	+	NA	NA	NA	NA	NA	NA	T	T	C	C	T	T	T	T	T	T	T	T	T	T	T	T	T	T	T	T	T	C	T	T	T	T	T	T	T	T	T	T	T	T	T	T	T	C	T
chr1H|HvGBSv2-143_87502007+112	G/T	1	87502119	+	NA	NA	NA	NA	NA	NA	G	G	G	G	T	G	T	T	G	T	G	T	T	T	T	G	G	G	T	T	G	G	G	G	T	G	G	G	G	G	G	T	T	T	G	G	G	G	G
chr1H|HvGBSv2-144_88490497+50	G/C	1	88490547	+	NA	NA	NA	NA	NA	NA	G	G	G	G	G	G	G	G	C	G	G	G	G	G	G	G	C	G	G	G	G	G	G	C	G	G	G	G	G	G	G	G	G	G	G	G	G	G	G
chr1H|HvGBSv2-144_88490497+58	T/C	1	88490555	+	NA	NA	NA	NA	NA	NA	T	T	T	Y	T	T	C	T	T	C	T	T	T	C	T	T	T	T	T	C	T	T	T	T	T	T	T	T	T	T	T	T	T	T	T	T	T	T	T
chr1H|HvGBSv2-144_88490497+60	C/T	1	88490557	+	NA	NA	NA	NA	NA	NA	C	C	C	Y	C	C	T	C	C	T	C	C	C	T	C	C	C	C	C	T	C	C	C	C	C	C	C	C	C	C	C	C	C	C	C	C	C	C	C
chr1H|HvGBSv2-2893_88896840+12	T/C	1	88896852	+	NA	NA	NA	NA	NA	NA	T	T	T	T	T	T	T	C	T	T	T	C	C	T	C	T	T	T	T	T	T	T	T	T	C	T	T	T	T	T	T	C	C	C	T	T	T	T	T
chr1H|HvGBSv2-2893_88896840+36	T/C	1	88896876	+	NA	NA	NA	NA	NA	NA	T	T	T	T	T	T	T	C	T	T	T	C	C	T	C	T	T	T	T	T	T	T	T	T	C	T	T	T	T	T	T	C	C	C	T	T	T	T	T
chr1H|HvGBSv2-2893_88896840+102	C/G	1	88896942	+	NA	NA	NA	NA	NA	NA	C	C	G	G	C	C	C	G	C	C	C	G	G	C	G	C	C	C	C	C	C	G	C	C	G	C	C	C	C	C	C	G	G	G	C	C	C	G	C
chr1H|HvGBSv2-6232_88999489+83	C/A	1	88999572	+	NA	NA	NA	NA	NA	NA	C	C	A	A	C	C	C	A	C	C	C	A	A	C	A	C	C	C	C	C	C	A	C	C	A	C	C	C	C	C	C	A	A	A	C	C	C	A	C
chr1H|HvGBSv2-6232_88999489+136	G/A	1	88999625	+	NA	NA	NA	NA	NA	NA	G	G	G	G	G	G	G	G	G	G	G	A	A	G	A	G	G	G	G	G	G	G	G	G	A	G	G	G	G	G	G	G	G	A	G	G	G	G	G
chr1H|HvGBSv2-145_89502828+139	T/C	1	89502967	+	NA	NA	NA	NA	NA	NA	T	T	T	T	T	T	T	C	T	T	T	C	C	T	C	T	T	T	T	T	T	T	T	T	C	T	T	T	T	T	T	C	C	C	T	T	T	T	T
chr1H|HvGBSv2-146_90498683+16	G/C	1	90498699	+	NA	NA	NA	NA	NA	NA	G	G	C	C	C	G	C	C	G	C	G	C	C	C	C	G	G	G	C	C	G	C	G	G	C	G	G	G	G	G	G	C	C	C	G	G	G	C	G
chr1H|HvGBSv2-6234_90999873+8	G/A	1	90999881	+	NA	NA	NA	NA	NA	NA	G	G	G	G	G	G	G	G	G	G	G	G	G	G	G	A	G	G	G	G	G	G	G	G	G	G	G	G	G	G	G	G	G	G	G	G	G	G	G
chr1H|HvGBSv2-6234_90999873+123	G/C	1	90999996	+	NA	NA	NA	NA	NA	NA	G	G	G	G	C	G	C	C	G	C	G	C	C	C	C	G	G	G	C	C	G	G	G	G	C	G	G	G	G	G	G	C	C	C	G	G	G	G	G
chr1H|HvGBSv2-147_91496511+104	G/C	1	91496615	+	NA	NA	NA	NA	NA	NA	G	G	G	G	G	G	G	C	G	G	G	C	C	G	C	G	G	G	G	G	G	G	G	G	C	G	G	G	G	G	G	C	C	C	G	G	G	G	G
chr1H|HvGBSv2-147_91496511+148	C/T	1	91496659	+	NA	NA	NA	NA	NA	NA	C	C	T	T	T	C	T	C	C	T	C	C	C	T	C	C	C	C	T	T	C	T	C	C	C	C	C	C	C	C	C	C	C	C	C	C	C	T	C
chr1H|HvGBSv2-5361_93092832+57	G/A	1	93092889	+	NA	NA	NA	NA	NA	NA	G	G	G	G	G	G	G	A	G	G	G	A	A	G	A	G	G	G	G	G	G	G	G	G	A	G	G	G	G	G	G	A	A	A	G	G	G	G	G
chr1H|HvGBSv2-5361_93092832+94	T/C	1	93092926	+	NA	NA	NA	NA	NA	NA	T	T	T	T	T	T	T	C	T	T	T	C	C	T	C	T	T	T	T	T	T	T	T	T	C	T	T	T	T	T	T	C	C	C	T	T	T	T	T
chr1H|HvGBSv2-149_93522089+19	C/A	1	93522108	+	NA	NA	NA	NA	NA	NA	C	C	C	C	C	C	C	C	C	C	C	C	C	C	C	C	C	C	M	C	C	C	C	C	C	C	C	C	C	C	C	M	C	C	C	C	C	C	C
chr1H|HvGBSv2-149_93522089+50	C/A	1	93522139	+	NA	NA	NA	NA	NA	NA	C	C	C	C	C	C	C	A	C	C	C	A	A	C	A	C	C	C	C	C	C	C	C	C	A	C	C	C	C	C	C	A	A	A	C	C	C	C	C
chr1H|HvGBSv2-149_93522089+80	A/G	1	93522169	+	NA	NA	NA	NA	NA	NA	A	A	A	A	G	A	G	A	A	G	A	A	A	G	A	A	A	A	G	G	A	A	A	A	A	A	A	A	A	A	A	A	A	A	A	A	A	A	A
chr1H|HvGBSv2-12067_93770058+160	T/C	1	93770218	+	NA	NA	NA	NA	NA	NA	T	T	T	T	C	T	C	T	T	C	C	T	T	C	T	T	T	T	C	C	T	T	T	T	T	T	T	T	T	T	T	T	T	T	T	T	T	T	T
chr1H|HvGBSv2-6237_94010636+54	T/G	1	94010690	+	NA	NA	NA	NA	NA	NA	T	T	T	T	T	T	T	G	T	T	T	G	G	T	G	T	T	T	T	T	T	T	T	T	G	T	T	T	T	T	T	G	G	G	T	T	T	T	T
chr1H|HvGBSv2-6237_94010636+102	T/C	1	94010738	+	NA	NA	NA	NA	NA	NA	T	T	T	T	C	T	C	C	T	C	T	C	C	C	C	T	T	T	C	C	T	T	T	T	C	T	T	T	T	T	T	C	C	C	T	T	T	T	T
chr1H|HvGBSv2-6237_94010636+133	A/C	1	94010769	+	NA	NA	NA	NA	NA	NA	A	A	A	A	A	A	M	A	A	A	A	A	A	A	A	A	A	A	A	A	A	A	A	A	A	A	A	A	A	A	A	A	A	A	A	A	A	A	A
chr1H|HvGBSv2-150_94328999+68	C/T	1	94329067	+	NA	NA	NA	NA	NA	NA	C	C	T	T	C	C	C	C	C	C	C	C	C	C	C	C	C	C	C	C	C	T	C	C	C	C	C	C	C	C	C	C	C	C	C	C	C	T	C
chr1H|HvGBSv2-150_94328999+74	T/G	1	94329073	+	NA	NA	NA	NA	NA	NA	T	T	G	G	G	T	G	G	T	G	T	G	G	G	G	T	T	T	G	G	T	G	T	T	G	T	T	T	T	T	T	G	G	G	T	T	T	G	T
chr1H|HvGBSv2-150_94328999+149	A/G	1	94329148	+	NA	NA	NA	NA	NA	NA	A	A	A	A	A	A	A	A	A	A	A	A	R	A	A	A	A	A	A	A	A	A	A	A	A	A	A	A	A	A	A	A	A	A	A	A	A	A	A
chr1H|HvGBSv2-6238_94995380+50	A/C	1	94995430	+	NA	NA	NA	NA	NA	NA	A	A	A	A	A	A	A	C	A	A	A	C	C	A	C	A	A	A	A	A	A	A	A	A	C	A	A	A	A	A	A	C	C	C	A	A	A	A	A
chr1H|HvGBSv2-6238_94995380+127	A/G	1	94995507	+	NA	NA	NA	NA	NA	NA	A	A	G	G	G	A	G	G	A	G	A	G	G	G	G	A	A	A	G	G	A	G	A	A	G	A	A	A	A	A	A	G	G	G	A	A	A	G	A
chr1H|HvGBSv2-6238_94995380+139	C/T	1	94995519	+	NA	NA	NA	NA	NA	NA	C	C	C	C	C	C	C	T	C	C	C	T	T	C	T	C	C	C	C	C	C	C	C	C	T	C	C	C	C	C	C	T	T	T	C	C	C	C	C
chr1H|HvGBSv2-6238_94995380+162	T/C	1	94995542	+	NA	NA	NA	NA	NA	NA	T	T	T	T	T	T	T	C	T	T	T	C	C	T	C	T	T	T	T	T	T	T	T	T	C	T	T	T	T	T	T	C	C	C	T	T	T	T	T
chr1H|HvGBSv2-6239_95963686+68	A/G	1	95963754	+	NA	NA	NA	NA	NA	NA	A	A	G	G	G	A	G	G	A	G	A	G	G	G	G	A	A	A	G	G	A	G	A	A	G	A	A	A	A	A	A	G	G	G	A	A	A	G	A
chr1H|HvGBSv2-152_96515087+16	G/C	1	96515103	+	NA	NA	NA	NA	NA	NA	G	G	G	G	G	G	G	G	C	G	G	G	G	G	G	G	C	C	G	G	C	S	C	C	G	G	G	G	G	G	G	G	G	G	C	G	G	G	G
chr1H|HvGBSv2-152_96515087+134	C/T	1	96515221	+	NA	NA	NA	NA	NA	NA	C	C	T	T	T	C	T	T	C	T	C	T	T	T	T	C	C	C	T	T	C	Y	C	C	T	C	C	C	C	C	C	T	T	T	C	C	C	T	C
chr1H|HvGBSv2-153_97488159+87	C/A	1	97488246	+	NA	NA	NA	NA	NA	NA	C	C	A	A	C	C	C	A	C	C	C	A	A	C	A	C	C	C	C	C	C	A	C	C	A	C	C	C	C	C	C	A	A	A	C	C	C	A	C
chr1H|HvGBSv2-153_97488159+111	T/C	1	97488270	+	NA	NA	NA	NA	NA	NA	T	T	T	T	C	T	C	T	T	C	T	T	T	C	T	T	T	T	C	C	T	T	T	T	T	T	T	T	T	T	T	T	T	T	T	T	T	T	T
chr1H|HvGBSv2-6241_98002939+150	C/A	1	98003089	+	NA	NA	NA	NA	NA	NA	C	C	A	A	C	C	C	A	C	C	C	A	A	C	A	C	C	C	C	C	C	A	C	C	A	C	C	C	C	C	C	A	A	A	C	C	C	A	C
chr1H|HvGBSv2-154_98738076+155	C/T	1	98738231	+	NA	NA	NA	NA	NA	NA	C	C	T	T	T	C	T	T	C	T	C	T	T	T	T	T	C	C	T	T	C	T	C	C	T	C	C	T	T	T	C	T	T	T	C	C	T	T	C
chr1H|HvGBSv2-6242_98999316+71	A/C	1	98999387	+	NA	NA	NA	NA	NA	NA	A	A	C	C	A	A	A	C	A	A	A	C	C	A	C	A	A	A	A	A	A	C	A	A	C	A	A	A	A	A	A	C	C	C	A	A	A	C	A
chr1H|HvGBSv2-155_99498239+20	T/C	1	99498259	+	NA	NA	NA	NA	NA	NA	T	T	C	C	T	T	T	T	T	T	T	T	T	T	T	T	T	T	T	T	T	C	T	T	T	T	T	T	T	T	T	T	T	T	T	T	T	C	T
chr1H|HvGBSv2-155_99498239+21	G/T	1	99498260	+	NA	NA	NA	NA	NA	NA	G	G	T	T	G	G	G	T	G	G	G	T	T	G	T	G	G	G	G	G	G	T	G	G	T	G	G	G	G	G	G	T	T	T	G	G	G	T	G
chr1H|HvGBSv2-155_99498239+102	A/G	1	99498341	+	NA	NA	NA	NA	NA	NA	A	A	G	G	A	A	A	G	A	A	A	G	G	A	G	A	A	A	A	A	A	G	A	A	G	A	A	A	A	A	A	G	G	G	A	A	A	G	A
chr1H|HvGBSv2-6243_99998862+18	A/C	1	99998880	+	NA	NA	NA	NA	NA	NA	A	A	A	A	A	A	A	A	A	A	A	A	A	A	A	A	A	A	A	A	A	A	A	A	A	A	A	A	A	A	A	C	C	A	A	A	A	A	A
chr1H|HvGBSv2-6243_99998862+22	G/T	1	99998884	+	NA	NA	NA	NA	NA	NA	G	G	T	T	G	G	G	T	G	G	G	T	T	G	T	G	G	G	G	G	G	T	G	G	T	G	G	G	G	G	G	T	T	T	G	G	G	T	G
chr1H|HvGBSv2-6243_99998862+70	A/G	1	99998932	+	NA	NA	NA	NA	NA	NA	A	A	G	G	A	A	A	G	A	A	A	G	G	A	G	A	A	A	A	A	A	G	A	A	G	A	A	A	A	A	A	G	G	G	A	A	A	G	A
chr1H|HvGBSv2-156_100499210+83	T/C	1	100499293	+	NA	NA	NA	NA	NA	NA	T	T	T	T	T	T	T	C	T	T	T	C	C	T	C	T	T	T	T	T	T	T	T	T	C	T	T	T	T	T	T	C	C	C	T	T	T	T	T
chr1H|HvGBSv2-156_100499210+151	T/C	1	100499361	+	NA	NA	NA	NA	NA	NA	T	T	T	T	T	T	T	C	T	T	T	C	C	T	C	T	T	T	T	T	T	T	T	T	C	T	T	T	T	T	T	C	C	C	T	T	T	T	T
chr1H|HvGBSv2-156_100499210+152	C/T	1	100499362	+	NA	NA	NA	NA	NA	NA	C	C	C	C	C	C	C	T	C	C	C	T	T	C	T	C	C	C	C	C	C	C	C	C	T	C	C	C	C	C	C	T	T	T	C	C	C	C	C
chr1H|HvGBSv2-6245_102004019+168	T/C	1	102004187	+	NA	NA	NA	NA	NA	NA	T	T	T	T	T	T	T	T	T	T	T	C	C	T	C	T	T	T	T	T	T	T	T	T	C	T	T	T	T	T	T	C	C	C	T	T	T	T	T
chr1H|HvGBSv2-6245_102004019+170	T/G	1	102004189	+	NA	NA	NA	NA	NA	NA	T	T	T	T	T	K	T	T	T	T	T	T	T	T	T	T	T	T	T	T	T	T	T	T	T	K	K	T	T	T	T	T	T	T	T	T	T	T	T
chr1H|HvGBSv2-158_102492935+19	T/G	1	102492954	+	NA	NA	NA	NA	NA	NA	T	T	T	T	T	T	T	T	T	T	T	G	T	T	T	T	T	T	T	T	T	T	T	T	G	T	T	T	T	T	T	T	T	G	T	T	T	T	T
chr1H|HvGBSv2-158_102492935+56	C/T	1	102492991	+	NA	NA	NA	NA	NA	NA	C	C	C	C	C	C	C	C	C	C	C	T	T	C	T	C	C	C	C	C	C	C	C	C	T	C	C	C	C	C	C	T	T	T	C	C	C	C	C
chr1H|HvGBSv2-158_102492935+63	G/A	1	102492998	+	NA	NA	NA	NA	NA	NA	G	G	G	G	G	G	G	G	G	G	G	A	A	G	A	G	G	G	G	G	G	G	G	G	A	G	G	G	G	G	G	A	A	A	G	G	G	G	G
chr1H|HvGBSv2-6246_103024929+58	G/T	1	103024987	+	NA	NA	NA	NA	NA	NA	G	G	T	T	G	G	G	G	G	G	G	G	G	G	G	G	G	G	G	G	G	T	G	G	G	G	G	G	G	G	G	G	G	G	G	G	G	T	G
chr1H|HvGBSv2-6246_103024929+80	A/C	1	103025009	+	NA	NA	NA	NA	NA	NA	A	A	A	A	A	A	A	A	A	A	A	C	C	A	C	A	A	A	A	A	A	A	A	A	C	A	A	A	A	A	A	C	C	C	A	A	A	A	A
chr1H|HvGBSv2-6246_103024929+95	A/C	1	103025024	+	NA	NA	NA	NA	NA	NA	A	A	A	A	A	A	A	A	A	A	A	C	A	A	A	A	A	A	A	A	A	A	A	A	C	A	A	A	A	A	A	A	A	C	A	A	A	A	A
chr1H|HvGBSv2-6246_103024929+129	G/A	1	103025058	+	NA	NA	NA	NA	NA	NA	G	G	G	G	G	G	G	G	G	G	G	A	A	G	A	G	G	G	G	G	G	G	G	G	A	G	G	G	G	G	G	A	A	A	G	G	G	G	G
chr1H|HvGBSv2-159_103520319+29	C/T	1	103520348	+	NA	NA	NA	NA	NA	NA	C	C	C	C	C	C	C	C	C	C	C	T	T	C	T	C	C	C	C	C	C	C	C	C	T	C	C	C	C	C	C	T	T	T	C	C	C	C	C
chr1H|HvGBSv2-4482_103610862+14	C/G	1	103610876	+	NA	NA	NA	NA	NA	NA	C	C	C	C	C	C	C	C	C	C	C	C	C	C	C	C	C	C	C	C	C	C	C	C	G	C	C	C	C	C	C	C	C	C	C	C	C	C	C
chr1H|HvGBSv2-4482_103610862+27	T/C	1	103610889	+	NA	NA	NA	NA	NA	NA	T	T	T	T	T	T	T	T	T	T	T	T	T	T	T	T	T	T	T	T	T	T	T	T	C	T	T	T	T	T	T	T	T	T	T	T	T	T	T
chr1H|HvGBSv2-4482_103610862+57	C/G	1	103610919	+	NA	NA	NA	NA	NA	NA	C	C	C	C	C	C	C	C	C	C	C	C	C	C	C	C	C	C	C	C	C	C	C	C	G	C	C	C	C	C	C	C	C	C	C	C	C	C	C
chr1H|HvGBSv2-4482_103610862+110	T/C	1	103610972	+	NA	NA	NA	NA	NA	NA	T	T	C	C	T	T	T	T	T	T	T	T	T	T	T	T	T	T	T	T	T	C	T	T	T	T	T	T	T	T	T	T	T	T	T	T	T	T	T
chr1H|HvGBSv2-4482_103610862+144	T/C	1	103611006	+	NA	NA	NA	NA	NA	NA	T	T	T	T	T	T	T	T	T	T	T	T	T	T	T	T	T	T	T	T	T	T	T	T	C	T	T	T	T	T	T	T	T	T	T	T	T	T	T
chr1H|HvGBSv2-162_106496738+82	G/A	1	106496820	+	NA	NA	NA	NA	NA	NA	G	G	A	A	A	G	A	A	G	A	G	G	G	A	G	A	G	G	A	A	G	A	G	G	G	G	G	A	A	A	G	A	A	G	G	A	A	A	G
chr1H|HvGBSv2-164_108467713+156	A/T	1	108467869	+	NA	NA	NA	NA	NA	NA	A	A	A	A	A	A	A	A	T	A	A	A	A	A	A	A	T	T	A	A	T	A	T	T	A	A	A	A	A	A	A	A	A	A	T	A	A	A	A
chr1H|HvGBSv2-6252_108990804+97	A/G	1	108990901	+	NA	NA	NA	NA	NA	NA	A	A	A	A	A	A	A	A	G	A	G	A	A	A	A	A	G	G	A	A	G	A	G	G	A	A	A	A	A	A	A	A	A	A	G	A	A	A	A
chr1H|HvGBSv2-165_109506149+29	T/C	1	109506178	+	NA	NA	NA	NA	NA	NA	T	T	T	T	T	T	T	T	C	T	T	T	T	T	T	T	C	C	T	T	C	T	C	C	T	T	T	T	T	T	T	T	T	T	C	T	T	T	T
chr1H|HvGBSv2-166_110526586+89	C/T	1	110526675	+	NA	NA	NA	NA	NA	NA	C	C	C	C	C	C	C	C	C	C	C	C	C	C	C	C	C	C	C	C	C	C	C	C	C	C	C	C	C	C	C	T	T	C	C	C	C	T	C
chr1H|HvGBSv2-6254_111008230+25	A/G	1	111008255	+	NA	NA	NA	NA	NA	NA	A	A	A	A	A	A	A	A	A	A	A	A	A	A	A	A	A	A	A	A	A	A	A	A	A	A	A	A	A	A	A	A	A	A	A	A	A	A	A
chr1H|HvGBSv2-167_111488965+14	T/C	1	111488979	+	NA	NA	NA	NA	NA	NA	T	T	T	T	T	T	T	T	T	T	T	T	T	T	T	T	T	T	T	T	T	T	T	T	T	T	T	T	T	T	T	C	C	T	T	T	T	C	T
chr1H|HvGBSv2-167_111488965+65	A/G	1	111489030	+	NA	NA	NA	NA	NA	NA	A	A	A	A	A	A	A	A	G	A	A	A	A	A	A	A	G	G	A	A	G	A	G	G	A	A	A	A	A	A	A	A	A	A	G	A	A	A	A
chr1H|HvGBSv2-167_111488965+86	G/A	1	111489051	+	NA	NA	NA	NA	NA	NA	G	G	G	G	G	G	G	G	G	G	G	G	G	G	G	G	G	G	G	G	G	G	G	G	G	G	G	G	G	G	G	A	A	G	G	G	G	A	G
chr1H|HvGBSv2-167_111488965+176	T/C	1	111489141	+	NA	NA	NA	NA	NA	NA	T	T	T	T	T	T	T	T	T	T	T	T	T	T	T	T	T	T	T	T	T	T	T	T	T	T	T	T	T	T	T	C	C	T	T	T	T	C	T
chr1H|HvGBSv2-6255_112017369+43	C/T	1	112017412	+	NA	NA	NA	NA	NA	NA	C	C	C	C	C	C	C	C	C	C	C	C	C	C	C	C	C	C	C	C	C	C	C	C	C	C	C	C	C	C	Y	Y	Y	C	C	C	C	Y	C
chr1H|HvGBSv2-6255_112017369+76	C/A	1	112017445	+	NA	NA	NA	NA	NA	NA	C	C	C	C	C	C	C	C	C	C	C	C	C	C	C	C	C	C	C	C	C	C	C	C	C	C	C	C	C	C	C	C	C	C	C	C	C	C	C
chr1H|HvGBSv2-6255_112017369+136	A/T	1	112017505	+	NA	NA	NA	NA	NA	NA	A	A	A	A	A	A	A	A	A	A	A	A	A	A	A	A	W	W	A	A	A	A	W	A	A	A	W	A	A	A	A	A	A	A	A	A	A	A	A
chr1H|HvGBSv2-168_112511308+125	T/C	1	112511433	+	NA	NA	NA	NA	NA	NA	T	T	T	T	T	T	T	T	C	T	C	T	T	T	T	T	C	C	T	T	C	T	C	C	T	T	T	T	T	T	T	T	T	T	C	T	T	T	T
chr1H|HvGBSv2-6256_113060173+43	A/G	1	113060216	+	NA	NA	NA	NA	NA	NA	A	A	A	A	A	A	A	A	A	A	A	A	A	A	A	A	A	A	A	A	A	A	A	A	A	A	A	A	A	A	A	A	A	A	A	A	A	G	A
chr1H|HvGBSv2-6256_113060173+76	A/G	1	113060249	+	NA	NA	NA	NA	NA	NA	A	A	A	A	A	A	A	A	G	A	A	A	A	A	A	A	G	G	A	A	G	A	G	G	A	A	A	A	A	A	A	A	A	A	G	A	A	A	A
chr1H|HvGBSv2-169_113473892+51	G/T	1	113473943	+	NA	NA	NA	NA	NA	NA	G	G	G	G	G	G	G	G	G	G	G	G	G	G	G	G	G	G	G	G	G	G	G	G	G	G	G	G	G	G	G	K	T	G	G	G	G	K	G
chr1H|HvGBSv2-170_114352916+41	T/C	1	114352957	+	NA	NA	NA	NA	NA	NA	T	T	T	T	T	T	T	T	C	T	T	T	T	T	T	T	C	C	T	T	C	T	C	C	T	T	T	T	T	T	T	T	T	T	C	T	T	T	T
chr1H|HvGBSv2-6258_114814534+79	G/A	1	114814613	+	NA	NA	NA	NA	NA	NA	G	G	G	G	G	G	G	G	G	G	G	G	G	G	G	G	G	G	G	G	G	G	G	G	G	G	G	G	G	G	G	A	A	G	G	G	G	A	G
chr1H|HvGBSv2-171_115433837+91	T/C	1	115433928	+	NA	NA	NA	NA	NA	NA	T	T	T	T	T	T	T	T	C	T	T	T	T	T	T	T	C	T	T	T	T	T	T	C	T	T	T	T	T	T	T	T	T	T	T	T	T	T	T
chr1H|HvGBSv2-171_115433837+151	T/C	1	115433988	+	NA	NA	NA	NA	NA	NA	T	T	T	T	T	T	T	T	C	T	T	T	T	T	T	T	C	C	T	T	C	T	C	C	T	T	T	T	T	T	T	T	T	T	C	T	T	T	T
chr1H|HvGBSv2-6259_116061139+42	A/G	1	116061181	+	NA	NA	NA	NA	NA	NA	A	G	A	A	A	G	A	A	A	A	A	G	A	A	A	A	A	A	A	A	A	A	A	A	G	G	G	A	A	A	A	G	G	G	A	A	G	A	G
chr1H|HvGBSv2-6260_116969198+56	A/C	1	116969254	+	NA	NA	NA	NA	NA	NA	A	A	A	A	A	A	A	A	C	A	A	A	A	A	A	A	C	C	A	A	C	A	C	C	A	A	A	A	A	A	A	A	A	A	C	A	A	A	A
chr1H|HvGBSv2-173_117421620+99	T/G	1	117421719	+	NA	NA	NA	NA	NA	NA	T	T	T	T	T	T	T	T	G	T	T	T	T	T	T	T	G	T	T	T	T	T	T	G	T	T	T	T	T	T	T	T	T	T	T	T	T	T	T
chr1H|HvGBSv2-6261_118076655+73	T/C	1	118076728	+	NA	NA	NA	NA	NA	NA	T	T	T	T	T	T	T	T	C	T	T	T	T	T	T	T	C	C	T	T	C	T	C	C	T	T	T	T	T	T	T	T	T	T	C	T	T	T	T
chr1H|HvGBSv2-6262_118935372+132	A/T	1	118935504	+	NA	NA	NA	NA	NA	NA	A	A	A	A	A	A	A	A	A	A	A	A	A	A	A	A	A	A	A	A	A	W	A	A	A	W	A	A	A	A	A	A	A	A	A	A	A	A	A
chr1H|HvGBSv2-6262_118935372+136	A/T	1	118935508	+	NA	NA	NA	NA	NA	NA	A	A	A	A	A	A	A	A	A	A	A	A	A	A	A	A	A	W	A	A	A	A	W	A	A	A	A	A	A	A	A	A	A	A	A	A	A	A	A
chr1H|HvGBSv2-6262_118935372+141	A/C	1	118935513	+	NA	NA	NA	NA	NA	NA	M	A	A	A	A	A	A	A	A	A	A	A	A	A	A	A	A	A	A	A	A	A	A	A	A	A	A	A	A	A	A	A	A	A	A	A	A	A	A
chr1H|HvGBSv2-6263_120013786+32	T/C	1	120013818	+	NA	NA	NA	NA	NA	NA	T	T	T	T	T	T	T	T	T	T	T	T	T	T	T	T	T	T	T	T	T	T	T	T	T	T	T	T	T	T	T	T	T	T	T	T	T	T	T
chr1H|HvGBSv2-6263_120013786+147	T/C	1	120013933	+	NA	NA	NA	NA	NA	NA	T	T	C	C	T	T	T	T	T	T	T	T	T	T	T	T	T	T	T	T	T	T	T	T	T	T	T	T	T	T	T	T	T	T	T	T	T	T	T
chr1H|HvGBSv2-176_120521640+116	T/G	1	120521756	+	NA	NA	NA	NA	NA	NA	T	T	T	T	T	T	T	T	G	T	T	T	T	T	T	T	G	T	T	T	T	T	T	G	T	T	T	T	T	T	T	T	T	T	T	T	T	T	T
chr1H|HvGBSv2-6264_121120799+88	T/C	1	121120887	+	NA	NA	NA	NA	NA	NA	T	T	T	T	T	T	T	T	C	T	C	T	T	T	T	T	C	C	T	T	C	T	C	C	T	T	T	T	T	T	T	T	T	T	C	T	T	T	T
chr1H|HvGBSv2-177_121505255+28	T/C	1	121505283	+	NA	NA	NA	NA	NA	NA	T	T	T	T	T	T	T	T	T	T	T	T	T	T	T	T	T	T	T	T	T	T	T	T	T	T	T	T	T	T	T	C	C	T	T	T	T	C	T
chr1H|HvGBSv2-177_121505255+77	A/G	1	121505332	+	NA	NA	NA	NA	NA	NA	A	A	A	A	A	A	A	A	A	A	A	A	A	A	A	A	A	A	A	A	A	A	A	A	A	A	A	A	A	A	A	A	A	A	A	A	A	A	A
chr1H|HvGBSv2-6265_121992814+43	G/T	1	121992857	+	NA	NA	NA	NA	NA	NA	G	G	G	G	G	G	G	G	T	G	G	G	G	G	G	G	T	T	G	G	T	G	T	T	G	G	G	G	G	G	G	G	G	G	T	G	G	G	G
chr1H|HvGBSv2-178_122621285+158	G/A	1	122621443	+	NA	NA	NA	NA	NA	NA	G	G	G	G	G	G	G	G	G	G	G	G	G	G	G	G	G	G	G	G	G	G	G	G	G	G	G	G	G	G	G	A	A	G	G	G	G	G	G
chr1H|HvGBSv2-6266_123007130+171	G/C	1	123007301	+	NA	NA	NA	NA	NA	NA	G	G	G	G	G	G	G	G	C	G	G	G	G	G	G	G	C	C	G	G	C	G	C	C	G	G	G	G	G	G	G	G	G	G	C	G	G	G	G
chr1H|HvGBSv2-179_123518630+81	T/C	1	123518711	+	NA	NA	NA	NA	NA	NA	T	T	T	T	T	T	T	T	C	T	T	T	T	T	T	T	C	C	T	T	C	T	C	C	T	T	T	T	T	T	T	T	T	T	C	T	T	T	T
chr1H|HvGBSv2-6267_123903574+132	A/C	1	123903706	+	NA	NA	NA	NA	NA	NA	A	A	A	A	A	A	A	A	C	A	A	A	A	A	A	A	C	C	A	A	C	A	C	C	A	A	A	A	A	A	A	A	A	A	C	A	A	A	A
chr1H|HvGBSv2-6268_125047383+40	A/G	1	125047423	+	NA	NA	NA	NA	NA	NA	A	A	A	A	A	A	A	A	G	A	A	A	A	A	A	A	G	G	A	A	G	A	G	G	A	A	A	A	A	A	A	A	A	A	G	A	A	A	A
chr1H|HvGBSv2-6269_125993364+63	T/G	1	125993427	+	NA	NA	NA	NA	NA	NA	T	T	T	T	T	T	T	T	G	T	T	T	T	T	T	T	G	G	T	T	G	T	G	G	T	T	T	T	T	T	T	T	T	T	G	T	T	T	T
chr1H|HvGBSv2-12083_126270664+67	C/A	1	126270731	+	NA	NA	NA	NA	NA	NA	C	C	C	C	A	C	A	C	C	A	C	C	C	A	C	C	C	C	A	A	C	C	C	C	C	C	C	C	C	C	C	C	C	C	C	C	C	C	C
chr1H|HvGBSv2-182_126422474+71	T/C	1	126422545	+	NA	NA	NA	NA	NA	NA	T	T	T	T	T	T	T	T	C	T	T	T	T	T	T	T	C	C	T	T	C	T	C	C	T	T	T	T	T	T	T	T	T	T	C	T	T	T	T
chr1H|HvGBSv2-6270_126936589+44	T/G	1	126936633	+	NA	NA	NA	NA	NA	NA	T	T	T	T	T	T	T	T	G	T	T	T	T	T	T	T	G	G	T	T	G	T	G	G	T	T	T	T	T	T	T	T	T	T	G	T	T	T	T
chr1H|HvGBSv2-183_127523243+47	A/G	1	127523290	+	NA	NA	NA	NA	NA	NA	A	A	A	A	A	A	A	A	A	A	A	A	A	A	A	A	A	A	A	A	A	A	A	A	A	A	A	A	A	A	A	G	G	A	A	A	A	A	A
chr1H|HvGBSv2-183_127523243+57	A/C	1	127523300	+	NA	NA	NA	NA	NA	NA	A	A	A	A	A	A	A	A	A	A	A	A	A	A	A	A	A	A	A	A	A	A	A	A	A	A	A	A	A	A	A	A	A	A	A	A	A	A	A
chr1H|HvGBSv2-6271_127945783+76	T/C	1	127945859	+	NA	NA	NA	NA	NA	NA	T	T	T	T	T	T	T	T	C	T	T	T	T	T	T	T	C	C	T	T	C	T	C	C	T	T	T	T	T	T	T	T	T	T	C	T	T	T	T
chr1H|HvGBSv2-6272_128998573+35	T/C	1	128998608	+	NA	NA	NA	NA	NA	NA	T	T	T	T	T	T	T	T	C	T	T	T	T	T	T	T	C	C	T	T	C	T	C	C	T	T	T	T	T	T	T	T	T	T	C	T	T	T	T
chr1H|HvGBSv2-6274_130999018+97	T/G	1	130999115	+	NA	NA	NA	NA	NA	NA	T	T	T	T	T	T	T	T	G	T	T	T	T	T	T	T	G	G	T	T	G	T	G	G	T	T	T	T	T	T	T	T	T	T	G	T	T	T	T
chr1H|HvGBSv2-6274_130999018+132	A/C	1	130999150	+	NA	NA	NA	NA	NA	NA	A	A	A	A	A	A	A	A	A	A	A	A	A	A	A	A	A	A	A	A	A	A	A	M	A	A	A	A	A	A	A	A	A	A	A	A	A	A	A
chr1H|HvGBSv2-188_132547201+87	T/C	1	132547288	+	NA	NA	NA	NA	NA	NA	T	T	T	T	T	T	T	T	T	T	T	T	T	T	T	T	T	T	T	T	T	T	T	T	T	T	T	T	T	T	T	T	T	T	T	T	T	T	T
chr1H|HvGBSv2-6276_133006664+8	T/C	1	133006672	+	NA	NA	NA	NA	NA	NA	T	T	T	T	T	T	T	T	T	T	T	T	T	T	T	T	T	T	T	T	T	T	T	T	T	T	T	T	T	T	T	Y	Y	T	T	T	T	Y	T
chr1H|HvGBSv2-6276_133006664+30	G/A	1	133006694	+	NA	NA	NA	NA	NA	NA	G	G	G	G	G	G	G	G	G	G	G	G	G	G	G	G	G	G	G	G	G	G	G	G	G	G	G	G	G	G	G	R	R	G	G	G	G	R	G
chr1H|HvGBSv2-6276_133006664+34	A/G	1	133006698	+	NA	NA	NA	NA	NA	NA	A	A	A	A	A	A	A	A	G	A	A	A	A	A	A	A	G	A	A	A	A	A	A	G	A	A	A	A	A	A	A	A	A	A	A	A	A	A	A
chr1H|HvGBSv2-189_133593091+45	G/T	1	133593136	+	NA	NA	NA	NA	NA	NA	G	G	G	G	G	G	G	G	T	G	T	G	G	G	G	G	T	T	G	G	T	G	T	T	G	G	G	G	G	G	G	G	G	G	T	G	G	G	G
chr1H|HvGBSv2-190_134450947+94	C/T	1	134451041	+	NA	NA	NA	NA	NA	NA	C	C	C	C	C	C	C	C	T	C	C	C	C	C	C	C	T	C	C	C	C	C	T	T	C	C	C	C	C	C	C	C	C	C	T	C	C	C	C
chr1H|HvGBSv2-6278_134967717+102	T/G	1	134967819	+	NA	NA	NA	NA	NA	NA	T	T	T	T	T	T	T	T	G	T	T	T	T	T	T	T	G	G	T	T	G	T	G	G	T	T	T	T	T	T	T	T	T	T	G	T	T	T	T
chr1H|HvGBSv2-6278_134967717+115	A/G	1	134967832	+	NA	NA	NA	NA	NA	NA	A	A	A	A	A	A	A	A	A	A	A	A	A	A	A	A	A	A	A	A	A	A	A	A	A	A	A	A	A	A	A	G	G	A	A	A	A	G	A
chr1H|HvGBSv2-191_135490183+59	T/A	1	135490242	+	NA	NA	NA	NA	NA	NA	T	T	T	T	T	T	T	T	T	T	T	T	T	T	T	T	T	T	T	T	T	T	T	T	T	T	T	T	T	T	T	A	A	T	T	T	T	A	T
chr1H|HvGBSv2-191_135490183+63	A/G	1	135490246	+	NA	NA	NA	NA	NA	NA	A	A	A	A	G	A	G	A	A	G	A	A	A	G	A	A	A	A	G	G	A	A	A	A	A	A	A	A	A	A	A	A	A	A	A	A	A	A	A
chr1H|HvGBSv2-6279_135971785+58	A/C	1	135971843	+	NA	NA	NA	NA	NA	NA	A	A	A	A	A	A	A	A	C	A	A	A	A	A	A	A	C	A	A	A	A	A	A	C	A	A	A	A	A	A	A	A	A	A	A	A	A	A	A
chr1H|HvGBSv2-192_136603891+69	T/C	1	136603960	+	NA	NA	NA	NA	NA	NA	T	T	T	T	T	T	T	T	C	T	T	T	T	T	T	T	C	C	T	T	C	T	C	C	T	T	T	T	T	T	T	T	T	T	C	T	T	T	T
chr1H|HvGBSv2-6280_137007763+39	T/G	1	137007802	+	NA	NA	NA	NA	NA	NA	T	T	T	T	T	T	T	T	T	T	T	G	T	T	T	T	T	T	T	T	T	T	T	T	G	T	T	T	T	T	T	T	T	G	T	T	T	T	T
chr1H|HvGBSv2-6280_137007763+101	T/A	1	137007864	+	NA	NA	NA	NA	NA	NA	T	T	T	T	T	T	T	T	T	T	T	T	T	T	T	T	T	T	T	T	T	T	T	T	T	T	T	T	T	T	T	T	T	T	T	T	T	T	T
chr1H|HvGBSv2-6281_138023966+46	A/G	1	138024012	+	NA	NA	NA	NA	NA	NA	A	A	A	A	A	A	A	A	A	A	A	A	A	A	A	A	A	A	A	A	A	A	A	A	A	A	A	A	G	G	A	A	A	A	A	A	A	A	A
chr1H|HvGBSv2-194_138512291+73	A/C	1	138512364	+	NA	NA	NA	NA	NA	NA	A	A	A	A	A	A	A	A	A	A	A	A	A	A	A	A	A	A	A	A	A	A	A	A	A	A	A	A	A	A	A	A	A	A	A	A	A	A	A
chr1H|HvGBSv2-194_138512291+74	A/C	1	138512365	+	NA	NA	NA	NA	NA	NA	A	A	A	A	A	A	A	A	A	A	A	A	A	A	A	A	A	A	A	A	A	A	A	A	A	A	A	A	A	A	A	A	A	A	A	A	A	A	A
chr1H|HvGBSv2-6282_139009295+2	A/G	1	139009297	+	NA	NA	NA	NA	NA	NA	A	A	A	A	A	A	A	A	A	A	A	A	A	A	A	A	A	A	A	A	A	A	A	A	A	A	A	A	A	A	A	A	A	A	A	A	A	A	A
chr1H|HvGBSv2-195_139482427+168	G/T	1	139482595	+	NA	NA	NA	NA	NA	NA	G	G	G	G	G	G	G	G	G	G	G	G	G	G	G	G	G	G	G	G	G	G	G	G	G	G	K	G	G	G	G	G	G	G	G	G	G	K	G
chr1H|HvGBSv2-196_140501215+137	A/G	1	140501352	+	NA	NA	NA	NA	NA	NA	A	A	A	A	A	A	A	A	A	A	A	A	A	A	A	A	A	A	A	A	A	A	A	A	A	A	A	A	A	A	A	R	R	A	A	A	A	R	A
chr1H|HvGBSv2-196_140501215+170	A/G	1	140501385	+	NA	NA	NA	NA	NA	NA	A	A	A	A	A	A	A	A	A	A	A	A	A	A	A	A	A	A	A	A	A	A	A	A	A	A	A	A	A	A	A	R	R	A	A	A	A	R	A
chr1H|HvGBSv2-6285_141967005+14	A/C	1	141967019	+	NA	NA	NA	NA	NA	NA	A	A	A	A	A	A	A	A	C	A	A	A	A	A	A	A	C	C	A	A	C	A	C	C	A	A	A	A	A	A	A	A	A	A	C	A	A	A	A
chr1H|HvGBSv2-198_142522969+17	A/G	1	142522986	+	NA	NA	NA	NA	NA	NA	A	A	A	A	A	A	A	A	A	A	A	A	A	A	A	A	A	A	A	A	A	A	A	A	A	A	A	A	A	A	A	G	G	A	A	A	A	G	A
chr1H|HvGBSv2-198_142522969+176	T/C	1	142523145	+	NA	NA	NA	NA	NA	NA	T	T	T	T	T	T	T	T	T	T	T	T	T	T	T	T	T	T	T	T	T	T	C	T	T	T	T	T	T	T	T	T	T	T	C	T	T	T	T
chr1H|HvGBSv2-199_143461811+93	T/C	1	143461904	+	NA	NA	NA	NA	NA	NA	T	T	T	T	T	T	T	T	C	T	T	T	T	T	T	T	C	C	T	T	C	T	C	C	T	T	T	T	T	T	T	T	T	T	C	T	T	T	T
chr1H|HvGBSv2-200_144422563+118	C/G	1	144422681	+	NA	NA	NA	NA	NA	NA	C	C	C	C	C	C	C	C	G	C	G	C	C	C	C	C	G	G	C	C	G	C	G	G	C	C	C	C	C	C	C	C	C	C	G	C	C	C	C
chr1H|HvGBSv2-6289_145930618+32	T/G	1	145930650	+	NA	NA	NA	NA	NA	NA	T	T	T	T	T	T	T	T	G	T	T	T	T	T	T	T	G	G	T	T	G	T	G	G	T	T	T	T	T	T	T	T	T	T	G	T	T	T	T
chr1H|HvGBSv2-6289_145930618+138	T/G	1	145930756	+	NA	NA	NA	NA	NA	NA	T	T	T	T	T	T	T	T	T	T	T	T	T	T	T	T	T	T	T	T	T	T	T	T	T	T	T	T	T	T	T	T	T	T	T	T	T	T	T
chr1H|HvGBSv2-202_146481978+7	C/T	1	146481985	+	NA	NA	NA	NA	NA	NA	C	C	C	C	C	C	C	C	C	C	C	C	C	C	C	C	C	C	C	C	C	C	C	C	C	C	C	C	C	C	C	T	T	C	C	C	C	T	C
chr1H|HvGBSv2-202_146481978+69	C/T	1	146482047	+	NA	NA	NA	NA	NA	NA	C	C	C	C	C	C	C	C	C	C	C	C	C	C	C	C	C	C	C	C	C	C	C	C	C	C	C	C	C	C	C	T	T	C	C	C	C	T	C
chr1H|HvGBSv2-202_146481978+74	G/T	1	146482052	+	NA	NA	NA	NA	NA	NA	G	G	G	G	G	G	G	G	T	G	T	G	G	G	G	G	T	T	G	G	T	G	T	T	G	G	G	G	G	G	G	G	G	G	T	G	G	G	G
chr1H|HvGBSv2-6290_146924235+121	T/G	1	146924356	+	NA	NA	NA	NA	NA	NA	T	T	T	T	T	T	T	T	G	T	T	T	T	T	T	T	G	G	T	T	G	T	G	G	T	T	T	T	T	T	T	T	T	T	G	T	T	T	T
chr1H|HvGBSv2-203_147503427+35	A/G	1	147503462	+	NA	NA	NA	NA	NA	NA	A	A	A	A	A	A	A	A	G	A	A	A	A	A	A	A	G	A	A	A	A	A	A	G	A	A	A	A	A	A	A	A	A	A	A	A	A	A	A
chr1H|HvGBSv2-6291_147954229+39	T/C	1	147954268	+	NA	NA	NA	NA	NA	NA	T	T	T	T	T	T	T	T	T	T	T	T	T	T	T	T	T	T	T	T	T	T	T	T	T	T	T	T	T	T	T	C	C	T	T	T	T	C	T
chr1H|HvGBSv2-6291_147954229+63	G/C	1	147954292	+	NA	NA	NA	NA	NA	NA	G	G	G	G	G	G	G	G	C	G	C	G	G	G	G	G	C	C	G	G	C	G	C	C	G	G	G	G	G	G	G	G	G	G	C	G	G	G	G
chr1H|HvGBSv2-6293_149967814+126	A/G	1	149967940	+	NA	NA	NA	NA	NA	NA	A	A	A	A	A	A	A	A	G	A	A	A	A	A	A	A	G	G	A	A	G	A	G	G	A	A	A	A	A	A	A	A	A	A	G	A	A	A	A
chr1H|HvGBSv2-207_151506133+86	T/C	1	151506219	+	NA	NA	NA	NA	NA	NA	T	T	T	T	T	T	T	T	T	T	T	T	T	T	T	T	T	T	T	Y	T	T	T	T	T	T	T	T	T	T	T	T	T	T	T	T	T	T	T
chr1H|HvGBSv2-6295_151934694+29	C/A	1	151934723	+	NA	NA	NA	NA	NA	NA	C	C	M	C	C	C	C	C	C	C	C	C	C	C	C	C	C	C	C	C	C	C	C	C	C	C	C	C	C	C	M	C	C	C	C	C	C	C	C
chr1H|HvGBSv2-208_152462140+66	A/C	1	152462206	+	NA	NA	NA	NA	NA	NA	A	A	A	A	A	A	A	A	C	A	A	A	A	A	A	A	C	C	A	A	C	A	C	C	A	A	A	A	A	A	A	A	A	A	C	A	A	A	A
chr1H|HvGBSv2-6297_154070934+62	G/A	1	154070996	+	NA	NA	NA	NA	NA	NA	G	G	G	G	G	G	G	G	A	G	G	G	G	G	G	G	A	A	G	G	A	G	A	A	G	G	G	G	G	G	G	G	G	G	A	G	G	G	G
chr1H|HvGBSv2-210_154524941+64	A/G	1	154525005	+	NA	NA	NA	NA	NA	NA	A	A	A	A	A	A	A	A	G	A	A	A	A	A	A	A	G	G	A	A	G	A	G	G	A	A	A	A	A	A	A	A	A	A	G	A	A	A	A
chr1H|HvGBSv2-6298_154931516+37	T/C	1	154931553	+	NA	NA	NA	NA	NA	NA	T	T	T	T	T	T	T	T	C	T	C	T	T	T	T	T	C	C	T	T	C	T	C	C	T	T	T	T	T	T	T	T	T	T	C	T	T	T	T
chr1H|HvGBSv2-211_155497001+57	T/C	1	155497058	+	NA	NA	NA	NA	NA	NA	T	T	T	T	T	T	T	T	C	T	C	T	T	T	T	T	C	C	T	T	C	T	C	C	T	T	T	T	T	T	T	T	T	T	C	T	T	T	T
chr1H|HvGBSv2-6299_156115712+61	A/G	1	156115773	+	NA	NA	NA	NA	NA	NA	A	A	A	A	A	A	A	A	G	A	A	A	A	A	A	A	G	A	A	A	A	A	A	G	A	A	A	A	A	A	A	A	A	A	A	A	A	A	A
chr1H|HvGBSv2-6300_156901045+13	C/A	1	156901058	+	NA	NA	NA	NA	NA	NA	C	C	C	C	C	C	C	C	C	C	C	C	C	C	C	C	C	C	C	C	C	C	C	C	C	C	C	C	C	C	C	C	C	C	C	C	C	C	C
chr1H|HvGBSv2-213_157507016+155	A/G	1	157507171	+	NA	NA	NA	NA	NA	NA	A	A	A	A	A	A	A	A	G	A	A	A	A	A	A	A	G	G	A	A	G	A	G	G	A	A	A	A	A	A	A	A	A	A	G	A	A	A	A
chr1H|HvGBSv2-6301_158008305+62	C/T	1	158008367	+	NA	NA	NA	NA	NA	NA	C	C	C	C	C	C	C	C	C	C	C	C	C	C	C	C	C	C	C	C	C	C	C	C	C	C	C	C	C	C	C	C	C	C	C	C	C	C	C
chr1H|HvGBSv2-6303_159992828+40	T/C	1	159992868	+	NA	NA	NA	NA	NA	NA	T	T	T	T	T	T	T	T	C	T	C	T	T	T	T	T	C	C	T	T	C	T	C	C	T	T	T	T	T	T	T	T	T	T	C	T	T	T	T
chr1H|HvGBSv2-216_160494233+27	T/C	1	160494260	+	NA	NA	NA	NA	NA	NA	T	T	T	T	T	T	T	T	C	T	T	T	T	T	T	T	C	C	T	T	C	T	C	C	T	T	T	T	T	T	T	T	T	T	C	T	T	T	T
chr1H|HvGBSv2-6304_161029965+151	T/G	1	161030116	+	NA	NA	NA	NA	NA	NA	T	T	T	T	T	T	T	T	G	T	T	T	T	T	T	T	G	G	T	T	G	T	G	G	T	T	T	T	T	T	T	T	T	T	G	T	T	T	T
chr1H|HvGBSv2-6304_161029965+169	G/A	1	161030134	+	NA	NA	NA	NA	NA	NA	G	G	G	G	G	G	G	G	G	G	G	G	G	G	G	G	G	G	G	G	G	G	G	G	G	G	G	G	G	G	A	A	A	G	G	G	G	A	G
chr1H|HvGBSv2-6305_161976880+110	T/C	1	161976990	+	NA	NA	NA	NA	NA	NA	T	T	T	T	T	T	T	T	C	T	T	T	T	T	T	T	C	C	T	T	C	T	C	C	T	T	T	T	T	T	T	T	T	T	C	T	T	T	T
chr1H|HvGBSv2-6306_162993064+121	A/G	1	162993185	+	NA	NA	NA	NA	NA	NA	A	A	A	A	A	A	A	A	G	A	A	A	A	A	A	A	G	G	A	A	G	A	G	G	A	A	A	A	A	A	A	A	A	A	G	A	A	A	A
chr1H|HvGBSv2-219_163461163+78	A/G	1	163461241	+	NA	NA	NA	NA	NA	NA	A	A	A	A	A	A	A	A	A	A	A	A	A	A	A	A	A	A	A	A	A	A	A	A	A	A	A	A	A	A	R	R	R	A	A	A	A	A	A
chr1H|HvGBSv2-219_163461163+166	T/C	1	163461329	+	NA	NA	NA	NA	NA	NA	T	T	T	T	T	T	T	T	T	T	T	T	T	T	T	T	T	T	T	T	T	T	T	T	T	T	T	T	T	T	Y	Y	Y	T	T	T	T	T	T
chr1H|HvGBSv2-6307_164006394+14	C/T	1	164006408	+	NA	NA	NA	NA	NA	NA	C	C	C	C	C	C	C	C	C	C	C	C	C	C	C	C	C	C	C	C	C	C	C	C	C	C	C	C	C	C	T	T	T	C	C	C	C	T	C
chr1H|HvGBSv2-6308_164998859+5	C/A	1	164998864	+	NA	NA	NA	NA	NA	NA	C	C	C	C	C	C	C	C	C	C	C	C	M	C	C	C	C	C	C	C	C	C	C	C	C	C	C	C	C	C	C	C	C	C	C	C	C	C	C
chr1H|HvGBSv2-6308_164998859+70	A/C	1	164998929	+	NA	NA	NA	NA	NA	NA	A	A	A	A	A	A	A	A	C	A	A	A	A	A	A	A	C	C	A	A	C	A	C	C	A	A	A	A	A	A	A	A	A	A	C	A	A	A	A
chr1H|HvGBSv2-222_166486031+131	T/C	1	166486162	+	NA	NA	NA	NA	NA	NA	T	T	T	T	T	T	T	T	C	T	T	T	T	T	T	T	C	C	T	T	C	T	C	C	T	T	T	T	T	T	T	T	T	T	C	T	T	T	T
chr1H|HvGBSv2-6310_166991266+33	A/C	1	166991299	+	NA	NA	NA	NA	NA	NA	A	A	A	A	A	A	A	A	A	A	A	A	A	A	A	A	A	A	A	A	A	A	A	A	A	A	A	A	A	A	C	C	C	A	A	A	A	C	A
chr1H|HvGBSv2-6310_166991266+144	G/A	1	166991410	+	NA	NA	NA	NA	NA	NA	G	G	G	G	G	G	G	G	G	G	G	G	G	G	G	G	G	G	G	G	G	G	G	G	G	G	G	G	G	G	A	A	A	G	G	G	G	A	G
chr1H|HvGBSv2-223_167521320+32	G/T	1	167521352	+	NA	NA	NA	NA	NA	NA	G	G	G	G	G	G	G	G	G	G	G	G	G	G	G	G	G	G	G	G	G	G	G	G	G	G	G	G	G	G	G	G	G	G	G	G	G	G	G
chr1H|HvGBSv2-6311_167980250+74	T/C	1	167980324	+	NA	NA	NA	NA	NA	NA	T	T	T	T	T	T	T	T	C	T	T	T	T	T	T	T	C	C	T	T	C	T	C	C	T	T	T	T	T	T	T	T	T	T	C	T	T	T	T
chr1H|HvGBSv2-6311_167980250+133	A/C	1	167980383	+	NA	NA	NA	NA	NA	NA	A	A	A	A	A	A	A	A	A	A	A	A	M	A	A	A	A	A	A	A	A	A	A	A	A	A	M	A	A	A	A	A	A	A	A	A	A	A	A
chr1H|HvGBSv2-224_168499982+42	C/G	1	168500024	+	NA	NA	NA	NA	NA	NA	C	C	C	C	C	C	C	C	C	C	C	C	C	C	C	C	C	C	C	C	C	C	C	C	C	C	C	C	C	C	G	G	G	C	C	C	C	G	C
chr1H|HvGBSv2-224_168499982+62	A/G	1	168500044	+	NA	NA	NA	NA	NA	NA	A	A	A	A	A	A	A	A	G	A	A	A	A	A	A	A	G	G	A	A	G	A	G	G	A	A	A	A	A	A	A	A	A	A	G	A	A	A	A
chr1H|HvGBSv2-224_168499982+178	C/G	1	168500160	+	NA	NA	NA	NA	NA	NA	C	C	C	C	C	C	C	C	C	C	C	C	C	C	C	C	C	C	C	C	C	C	C	C	C	C	C	C	C	C	G	G	G	C	C	C	C	G	C
chr1H|HvGBSv2-225_169496620+76	T/C	1	169496696	+	NA	NA	NA	NA	NA	NA	T	T	T	T	T	T	T	T	C	T	T	T	T	T	T	T	C	C	T	T	C	T	C	C	T	T	T	T	T	T	T	T	T	T	C	T	T	T	T
chr1H|HvGBSv2-6316_173020763+146	C/G	1	173020909	+	NA	NA	NA	NA	NA	NA	C	C	C	C	C	C	C	C	G	C	C	C	C	C	C	C	G	C	C	C	C	C	C	G	C	C	C	C	C	C	C	C	C	C	C	C	C	C	C
chr1H|HvGBSv2-229_173462308+49	T/C	1	173462357	+	NA	NA	NA	NA	NA	NA	T	T	T	T	T	T	T	T	C	T	C	T	T	T	T	T	C	C	T	T	C	T	C	C	T	T	T	T	T	T	T	T	T	T	C	T	T	T	T
chr1H|HvGBSv2-6317_173993403+137	C/T	1	173993540	+	NA	NA	NA	NA	NA	NA	C	C	C	C	C	C	C	C	C	C	C	C	C	C	C	C	C	C	C	C	C	C	C	C	C	C	C	C	C	C	C	C	C	C	C	C	C	C	C
chr1H|HvGBSv2-6318_175008334+60	T/C	1	175008394	+	NA	NA	NA	NA	NA	NA	T	T	T	T	T	T	T	T	C	T	T	T	T	T	T	T	C	C	T	T	C	T	C	C	T	T	T	T	T	T	T	T	T	T	C	T	T	T	T
chr1H|HvGBSv2-12079_175647289+50	C/T	1	175647339	+	NA	NA	NA	NA	NA	NA	C	C	C	C	C	C	C	C	C	C	C	C	C	C	C	C	C	C	C	C	C	C	C	C	C	C	C	C	C	C	T	T	T	C	C	C	C	T	C
chr1H|HvGBSv2-233_177452720+155	T/C	1	177452875	+	NA	NA	NA	NA	NA	NA	T	T	T	T	T	T	T	T	C	T	T	T	T	T	T	T	C	C	T	T	C	T	C	C	T	T	T	T	T	T	T	T	T	T	C	T	T	T	T
chr1H|HvGBSv2-6321_178009062+151	A/G	1	178009213	+	NA	NA	NA	NA	NA	NA	A	A	A	A	A	A	A	A	A	A	A	A	A	A	A	A	A	A	A	A	A	A	A	A	G	A	A	A	A	A	A	A	A	G	A	A	A	A	A
chr1H|HvGBSv2-234_178507095+142	T/C	1	178507237	+	NA	NA	NA	NA	NA	NA	T	T	T	T	T	T	T	T	C	T	T	T	T	T	T	T	C	C	T	T	C	T	C	C	T	T	T	T	T	T	T	T	T	T	C	T	T	T	T
chr1H|HvGBSv2-6322_179013232+158	A/G	1	179013390	+	NA	NA	NA	NA	NA	NA	A	A	A	A	A	A	A	A	G	A	A	A	A	A	A	A	G	G	A	A	G	A	G	G	A	A	A	A	A	A	A	A	A	A	G	A	A	A	A
chr1H|HvGBSv2-236_180285779+53	A/G	1	180285832	+	NA	NA	NA	NA	NA	NA	A	A	A	A	A	A	A	A	G	A	A	A	A	A	A	A	G	G	A	A	G	A	G	G	A	A	A	A	A	A	A	A	A	A	G	A	A	A	A
chr1H|HvGBSv2-237_181493910+59	A/G	1	181493969	+	NA	NA	NA	NA	NA	NA	A	A	A	A	A	A	A	A	G	A	A	A	A	A	A	A	G	G	A	A	G	A	G	G	A	A	A	A	A	A	A	A	A	A	G	A	A	A	A
chr1H|HvGBSv2-237_181493910+131	T/C	1	181494041	+	NA	NA	NA	NA	NA	NA	T	T	T	T	T	T	T	T	C	T	T	T	T	T	T	T	C	C	T	T	C	T	C	C	T	T	T	T	T	T	T	T	T	T	C	T	T	T	T
chr1H|HvGBSv2-6325_181995118+48	T/C	1	181995166	+	NA	NA	NA	NA	NA	NA	T	T	T	T	T	T	T	T	C	T	T	T	T	T	T	T	C	C	T	T	C	T	C	C	T	T	T	T	T	T	T	T	T	T	C	T	T	T	T
chr1H|HvGBSv2-6325_181995118+98	A/C	1	181995216	+	NA	NA	NA	NA	NA	NA	A	A	A	A	A	A	A	A	A	A	A	A	A	A	A	A	A	A	A	A	A	A	A	A	A	A	A	A	A	A	C	C	C	A	A	A	A	C	A
chr1H|HvGBSv2-238_182522896+59	A/C	1	182522955	+	NA	NA	NA	NA	NA	NA	A	A	A	A	A	A	A	A	C	A	C	A	A	A	A	A	C	C	A	A	C	A	C	C	A	A	A	A	A	A	A	A	A	A	C	A	A	A	A
chr1H|HvGBSv2-239_183471635+14	T/C	1	183471649	+	NA	NA	NA	NA	NA	NA	T	T	T	T	T	T	T	T	C	T	T	T	T	T	T	T	C	C	T	T	C	T	C	C	T	T	T	T	T	T	T	T	T	T	C	T	T	T	T
chr1H|HvGBSv2-6327_184010722+54	A/G	1	184010776	+	NA	NA	NA	NA	NA	NA	A	A	A	A	A	A	A	A	G	A	G	A	A	A	A	A	G	G	A	A	G	A	G	G	A	A	A	A	A	A	A	A	A	A	G	A	A	A	A
chr1H|HvGBSv2-240_184500309+124	T/C	1	184500433	+	NA	NA	NA	NA	NA	NA	T	T	T	T	T	T	T	T	C	T	T	T	T	T	T	T	C	T	T	T	T	T	T	C	T	T	T	T	T	T	T	T	T	T	T	T	T	T	T
chr1H|HvGBSv2-6328_184996244+22	T/G	1	184996266	+	NA	NA	NA	NA	NA	NA	T	T	T	T	T	T	T	T	G	T	T	T	T	T	T	T	G	G	T	T	G	T	G	G	T	T	T	T	T	T	T	T	T	T	G	T	T	T	T
chr1H|HvGBSv2-6328_184996244+85	A/C	1	184996329	+	NA	NA	NA	NA	NA	NA	A	A	A	A	A	A	A	A	A	A	A	A	A	A	A	A	A	A	A	A	A	A	A	A	A	A	A	A	A	A	A	A	A	A	A	A	A	A	A
chr1H|HvGBSv2-241_185487548+82	T/C	1	185487630	+	NA	NA	NA	NA	NA	NA	T	T	T	T	T	T	T	T	C	T	T	T	T	T	T	T	C	C	T	T	C	T	C	C	T	T	T	T	T	T	T	T	T	T	C	T	T	T	T
chr1H|HvGBSv2-6329_186030368+89	A/G	1	186030457	+	NA	NA	NA	NA	NA	NA	A	A	A	A	A	A	A	A	G	A	A	A	A	A	A	A	G	G	A	A	G	A	G	G	A	A	A	A	A	A	A	A	A	A	G	A	A	R	A
chr1H|HvGBSv2-6329_186030368+138	T/G	1	186030506	+	NA	NA	NA	NA	NA	NA	T	T	T	T	T	T	T	T	T	T	T	T	T	T	T	T	T	T	T	T	T	T	T	T	T	T	T	T	T	T	T	T	T	T	T	T	T	K	T
chr1H|HvGBSv2-242_186523719+87	A/G	1	186523806	+	NA	NA	NA	NA	NA	NA	A	A	A	A	A	A	A	A	G	A	G	A	A	A	A	A	G	G	A	A	G	A	G	G	A	A	A	A	A	A	A	A	A	A	G	A	A	A	A
chr1H|HvGBSv2-6331_188036884+13	T/C	1	188036897	+	NA	NA	NA	NA	NA	NA	T	T	T	T	T	T	T	T	C	T	T	T	T	T	T	T	C	C	T	Y	C	T	C	C	T	T	T	T	T	T	T	T	T	T	C	T	T	T	T
chr1H|HvGBSv2-244_188576691+66	A/G	1	188576757	+	NA	NA	NA	NA	NA	NA	A	A	A	A	A	A	A	A	G	A	A	A	A	A	A	A	G	A	A	A	A	A	A	G	A	A	A	A	A	A	A	A	A	A	A	A	A	A	A
chr1H|HvGBSv2-246_190507637+156	T/A	1	190507793	+	NA	NA	NA	NA	NA	NA	T	T	T	T	T	T	T	T	A	T	T	T	T	T	T	T	A	A	T	T	A	T	A	A	T	T	T	T	T	T	T	T	T	T	A	T	T	T	T
chr1H|HvGBSv2-6333_190985010+161	A/G	1	190985171	+	NA	NA	NA	NA	NA	NA	A	A	G	G	A	A	A	A	A	A	A	A	A	A	A	A	A	A	A	A	A	G	A	A	A	A	A	A	A	A	A	A	A	A	A	A	A	A	A
chr1H|HvGBSv2-247_191456309+48	T/A	1	191456357	+	NA	NA	NA	NA	NA	NA	T	T	T	T	T	T	T	T	A	T	T	T	T	T	T	T	A	A	T	T	A	T	A	A	T	T	T	T	T	T	T	T	T	T	A	T	T	T	T
chr1H|HvGBSv2-6336_193992050+3	A/C	1	193992053	+	NA	NA	NA	NA	NA	NA	A	A	A	A	A	A	A	A	A	A	A	A	A	A	A	C	A	A	A	A	A	A	A	A	A	A	A	A	A	A	A	A	A	A	A	A	A	A	A
chr1H|HvGBSv2-6336_193992050+151	C/T	1	193992201	+	NA	NA	NA	NA	NA	NA	C	C	T	T	T	C	T	T	C	T	C	C	C	T	C	T	C	C	T	T	C	T	C	C	C	C	C	T	T	T	T	T	T	C	C	C	T	T	C
chr1H|HvGBSv2-6338_195995675+108	A/G	1	195995783	+	NA	NA	NA	NA	NA	NA	A	A	A	A	A	A	A	A	G	A	G	A	A	A	A	A	G	G	A	A	G	A	G	G	A	A	A	A	A	A	A	A	A	A	G	A	A	A	A
chr1H|HvGBSv2-252_196494671+48	T/A	1	196494719	+	NA	NA	NA	NA	NA	NA	T	T	T	T	T	T	T	T	T	T	A	T	T	T	T	T	T	T	T	T	T	T	T	T	T	T	T	T	T	T	T	T	T	T	T	T	T	T	T
chr1H|HvGBSv2-252_196494671+52	G/C	1	196494723	+	NA	NA	NA	NA	NA	NA	G	G	G	G	G	G	G	G	G	G	G	G	G	G	G	G	G	G	G	G	G	G	G	G	G	G	G	G	G	G	G	G	G	G	G	G	G	G	G
chr1H|HvGBSv2-252_196494671+128	A/T	1	196494799	+	NA	NA	NA	NA	NA	NA	A	A	A	A	A	A	A	A	A	A	A	A	A	A	A	A	A	A	A	A	A	A	A	A	A	A	A	A	A	A	A	A	A	A	A	A	A	A	A
chr1H|HvGBSv2-6339_197030543+111	C/G	1	197030654	+	NA	NA	NA	NA	NA	NA	C	C	C	C	C	C	C	C	G	C	C	C	C	C	C	C	G	G	C	C	G	C	G	G	C	C	C	C	C	C	C	C	C	C	G	C	C	C	C
chr1H|HvGBSv2-254_198477396+146	T/G	1	198477542	+	NA	NA	NA	NA	NA	NA	T	T	T	T	T	T	T	T	T	T	T	T	T	T	T	T	T	T	T	T	T	T	T	T	T	T	T	T	T	T	T	T	T	T	T	T	T	T	T
chr1H|HvGBSv2-255_199488173+61	C/G	1	199488234	+	NA	NA	NA	NA	NA	NA	C	C	C	C	C	C	C	C	G	C	C	C	C	C	C	C	G	G	C	C	G	C	G	G	C	C	C	C	C	C	C	C	C	C	G	C	C	C	C
chr1H|HvGBSv2-6342_200994628+167	T/C	1	200994795	+	NA	NA	NA	NA	NA	NA	T	T	T	T	T	T	T	T	T	T	T	T	T	T	T	T	T	T	T	T	T	T	T	T	T	T	T	T	T	T	T	T	T	T	T	T	T	T	T
chr1H|HvGBSv2-258_202502824+118	A/C	1	202502942	+	NA	NA	NA	NA	NA	NA	A	A	A	A	A	A	A	A	C	A	A	A	A	A	A	A	C	C	A	A	C	A	C	C	A	A	A	A	A	A	A	A	A	A	C	A	A	A	A
chr1H|HvGBSv2-6344_203007990+74	T/C	1	203008064	+	NA	NA	NA	NA	NA	NA	T	T	T	T	T	T	T	T	T	T	T	T	T	T	T	T	T	T	T	T	T	T	T	T	T	T	T	T	T	T	C	C	C	T	T	T	T	C	T
chr1H|HvGBSv2-6344_203007990+150	A/C	1	203008140	+	NA	NA	NA	NA	NA	NA	A	A	A	A	A	A	A	A	C	A	A	A	A	A	A	A	C	C	A	A	C	A	C	C	A	A	A	A	A	A	A	A	A	A	C	A	A	A	A
chr1H|HvGBSv2-6346_205003756+86	A/G	1	205003842	+	NA	NA	NA	NA	NA	NA	A	A	A	A	A	A	A	A	G	A	G	A	A	A	A	A	G	G	A	A	G	A	G	G	A	A	A	A	A	A	A	A	A	A	G	A	A	A	A
chr1H|HvGBSv2-261_205503023+130	C/A	1	205503153	+	NA	NA	NA	NA	NA	NA	C	C	C	C	C	C	C	C	C	C	C	C	C	C	C	C	C	C	C	C	C	C	C	C	C	C	C	C	C	C	C	C	C	C	C	C	C	C	C
chr1H|HvGBSv2-261_205503023+138	A/G	1	205503161	+	NA	NA	NA	NA	NA	NA	A	A	A	A	A	A	A	A	G	A	A	A	A	A	A	A	G	G	A	A	G	A	G	G	A	A	A	A	A	A	A	A	A	A	G	A	A	A	A
chr1H|HvGBSv2-6347_205997256+80	T/A	1	205997336	+	NA	NA	NA	NA	NA	NA	T	T	T	T	T	T	T	T	T	T	T	T	T	T	T	T	T	T	T	T	T	T	T	T	T	T	T	T	T	T	T	T	T	T	T	T	T	T	T
chr1H|HvGBSv2-6349_207947994+28	G/C	1	207948022	+	NA	NA	NA	NA	NA	NA	G	G	G	G	G	G	G	G	G	G	G	G	G	G	G	G	G	G	G	G	G	G	G	G	G	G	G	G	G	G	C	C	C	G	G	G	G	G	G
chr1H|HvGBSv2-6350_208996952+75	T/C	1	208997027	+	NA	NA	NA	NA	NA	NA	T	T	T	T	T	T	T	T	C	T	T	T	T	T	T	T	C	C	T	T	C	T	C	C	T	T	T	T	T	T	T	T	T	T	C	T	T	T	T
chr1H|HvGBSv2-265_209500317+73	G/A	1	209500390	+	NA	NA	NA	NA	NA	NA	G	G	G	G	G	G	G	G	G	G	G	G	G	G	G	G	G	G	G	G	G	G	G	G	G	G	G	G	G	G	A	A	A	G	G	G	G	A	G
chr1H|HvGBSv2-265_209500317+78	A/C	1	209500395	+	NA	NA	NA	NA	NA	NA	A	A	A	A	A	A	A	A	C	A	A	A	A	A	A	A	C	C	A	A	C	A	C	C	A	A	A	A	A	A	A	A	A	A	C	A	A	A	A
chr1H|HvGBSv2-6351_210014398+72	C/A	1	210014470	+	NA	NA	NA	NA	NA	NA	C	C	C	C	C	C	C	C	C	C	C	C	C	C	C	C	C	C	C	C	C	C	C	C	C	C	C	C	C	C	A	A	A	M	C	C	C	C	C
chr1H|HvGBSv2-6352_211010753+63	T/C	1	211010816	+	NA	NA	NA	NA	NA	NA	T	T	T	T	T	T	T	T	C	T	C	T	T	T	T	T	C	C	T	T	C	T	C	C	T	T	T	T	T	T	T	T	T	T	C	T	T	T	T
chr1H|HvGBSv2-6353_211975894+3	A/G	1	211975897	+	NA	NA	NA	NA	NA	NA	A	G	A	A	A	G	A	A	A	A	A	G	A	A	A	A	A	A	A	A	A	A	A	A	G	G	G	A	A	A	A	A	A	G	A	A	A	A	G
chr1H|HvGBSv2-6353_211975894+114	T/G	1	211976008	+	NA	NA	NA	NA	NA	NA	T	T	T	T	T	T	T	T	T	T	T	T	T	T	T	T	T	T	T	T	T	T	T	T	T	T	T	T	T	T	G	G	G	T	T	T	T	T	T
chr1H|HvGBSv2-269_213523627+29	G/T	1	213523656	+	NA	NA	NA	NA	NA	NA	G	G	G	G	K	G	G	G	G	G	G	G	G	G	G	G	G	G	G	G	G	G	G	G	G	G	G	G	G	K	G	G	G	G	G	G	K	G	G
chr1H|HvGBSv2-269_213523627+122	G/T	1	213523749	+	NA	NA	NA	NA	NA	NA	G	G	G	G	G	G	G	G	G	G	G	G	G	G	G	G	G	G	G	G	G	G	G	G	G	G	G	G	G	G	G	G	G	G	G	G	G	G	G
chr1H|HvGBSv2-270_214491701+50	T/C	1	214491751	+	NA	NA	NA	NA	NA	NA	T	T	T	T	T	T	T	T	C	T	T	T	T	T	T	T	C	C	T	T	C	T	C	C	T	T	T	T	T	T	T	T	T	T	C	T	T	T	T
chr1H|HvGBSv2-6356_215004071+43	A/G	1	215004114	+	NA	NA	NA	NA	NA	NA	A	A	A	A	A	A	A	A	G	A	A	A	A	A	A	A	G	A	A	A	A	A	A	G	A	A	A	A	A	A	A	A	A	A	A	A	A	A	A
chr1H|HvGBSv2-6356_215004071+96	C/G	1	215004167	+	NA	NA	NA	NA	NA	NA	C	C	C	C	C	C	C	C	C	C	C	C	C	C	C	C	C	C	C	C	C	C	C	C	C	C	C	C	C	C	C	C	C	C	C	C	G	C	C
chr1H|HvGBSv2-6356_215004071+133	C/A	1	215004204	+	NA	NA	NA	NA	NA	NA	C	C	C	C	C	C	C	C	C	C	C	C	C	C	C	C	C	C	C	C	C	C	C	C	C	C	C	C	C	C	C	C	C	C	C	C	C	C	C
chr1H|HvGBSv2-6358_216980225+40	A/G	1	216980265	+	NA	NA	NA	NA	NA	NA	A	A	A	A	A	A	A	A	A	A	A	A	G	A	A	A	A	A	A	A	A	A	A	A	A	A	A	A	A	A	A	A	A	A	A	A	A	A	A
chr1H|HvGBSv2-6358_216980225+46	C/T	1	216980271	+	NA	NA	NA	NA	NA	NA	C	C	C	C	C	C	C	C	C	C	C	C	C	C	C	C	C	C	C	C	C	C	C	C	C	C	C	C	C	C	T	T	T	C	C	C	C	T	C
chr1H|HvGBSv2-6358_216980225+107	G/C	1	216980332	+	NA	NA	NA	NA	NA	NA	G	G	G	G	G	G	G	G	G	G	G	G	G	G	G	G	G	G	G	G	G	G	G	G	G	G	G	G	G	G	C	C	C	G	G	G	G	C	G
chr1H|HvGBSv2-6359_217967853+62	T/G	1	217967915	+	NA	NA	NA	NA	NA	NA	T	T	T	T	T	T	T	T	G	T	T	T	T	T	T	T	G	G	T	T	G	T	G	G	T	T	T	T	T	T	T	T	T	T	G	T	T	T	T
chr1H|HvGBSv2-274_218480042+41	T/C	1	218480083	+	NA	NA	NA	NA	NA	NA	T	T	T	T	T	T	T	T	C	T	T	T	T	T	T	T	C	T	T	T	T	T	T	C	T	T	T	T	T	T	T	T	T	T	T	T	T	T	T
chr1H|HvGBSv2-275_219487900+176	A/G	1	219488076	+	NA	NA	NA	NA	NA	NA	A	A	A	A	A	A	A	A	G	A	A	A	A	A	A	A	G	G	A	A	G	A	G	G	A	A	A	A	A	A	A	A	A	A	G	A	A	A	A
chr1H|HvGBSv2-6361_219996665+29	G/T	1	219996694	+	NA	NA	NA	NA	NA	NA	G	G	G	G	G	G	G	G	T	G	T	G	G	G	G	G	T	T	G	G	T	G	T	T	G	G	G	G	G	G	G	G	G	G	T	G	G	G	G
chr1H|HvGBSv2-6361_219996665+148	A/T	1	219996813	+	NA	NA	NA	NA	NA	NA	A	W	A	A	A	A	A	A	A	A	A	A	A	A	A	A	A	A	A	A	A	A	A	A	A	A	A	A	A	A	A	A	A	A	A	A	A	A	A
chr1H|HvGBSv2-6361_219996665+161	A/C	1	219996826	+	NA	NA	NA	NA	NA	NA	A	A	A	A	A	A	A	A	A	A	A	A	A	A	A	A	A	A	A	A	A	A	A	A	A	M	M	A	A	A	A	A	A	A	A	A	A	A	A
chr1H|HvGBSv2-1766_220285772+14	G/A	1	220285786	+	NA	NA	NA	NA	NA	NA	A	A	A	A	A	A	A	A	A	A	A	G	G	A	A	G	G	G	A	A	A	A	G	G	G	A	G	G	G	A	A	A	A	A	A	A	G	A	G
chr1H|HvGBSv2-1766_220285772+23	A/C	1	220285795	+	NA	NA	NA	NA	NA	NA	A	A	A	A	A	A	A	A	A	A	A	A	A	A	A	A	A	A	A	A	A	A	A	A	A	A	A	A	A	A	A	A	A	A	A	A	A	A	A
chr1H|HvGBSv2-1766_220285772+25	A/G	1	220285797	+	NA	NA	NA	NA	NA	NA	G	A	A	A	A	A	A	A	A	A	A	A	A	A	G	A	A	A	A	A	A	A	A	A	A	A	A	A	A	A	A	A	A	A	A	A	A	A	A
chr1H|HvGBSv2-1766_220285772+44	A/G	1	220285816	+	NA	NA	NA	NA	NA	NA	G	A	A	A	A	A	A	A	A	A	A	A	A	A	G	A	A	A	A	A	A	A	A	A	A	A	A	A	A	A	A	A	A	A	A	A	A	A	A
chr1H|HvGBSv2-1766_220285772+136	A/C	1	220285908	+	NA	NA	NA	NA	NA	NA	A	A	A	A	A	A	A	M	A	A	A	A	A	A	A	A	A	A	M	A	A	A	A	A	A	A	A	A	A	A	A	A	A	A	A	A	A	A	A
chr1H|HvGBSv2-1766_220285772+154	A/C	1	220285926	+	NA	NA	NA	NA	NA	NA	A	A	M	A	A	A	A	A	A	A	A	A	A	A	A	A	A	A	A	A	A	A	A	A	A	A	A	A	A	A	A	A	A	A	A	A	A	A	A
chr1H|HvGBSv2-276_220509966+20	C/T	1	220509986	+	NA	NA	NA	NA	NA	NA	C	C	C	C	C	C	C	C	T	C	C	C	C	Y	C	C	T	T	C	C	T	C	T	T	C	C	C	C	C	C	C	C	C	C	T	C	C	C	C
chr1H|HvGBSv2-278_222497481+111	G/A	1	222497592	+	NA	NA	NA	NA	NA	NA	G	G	G	G	G	G	G	G	A	G	G	G	G	G	G	G	A	G	G	G	G	G	G	A	G	G	G	G	G	G	G	G	G	G	G	G	G	G	G
chr1H|HvGBSv2-6710_223478244+153	G/A	1	223478397	+	NA	NA	NA	NA	NA	NA	G	G	G	G	G	G	G	G	A	G	G	G	G	G	G	G	A	A	G	G	A	G	A	A	G	G	G	G	G	G	G	G	G	G	A	G	G	G	G
chr1H|HvGBSv2-279_223499752+56	A/G	1	223499808	+	NA	NA	NA	NA	NA	NA	A	A	A	A	A	A	A	A	A	A	A	A	A	A	A	A	A	A	A	A	A	A	A	A	A	A	A	A	A	A	A	A	A	A	A	A	A	A	A
chr1H|HvGBSv2-280_224497464+67	A/G	1	224497531	+	NA	NA	NA	NA	NA	NA	A	A	A	A	A	A	A	A	G	A	G	A	A	A	A	A	G	G	A	A	G	A	G	G	A	A	A	A	A	A	A	A	A	A	G	A	A	A	A
chr1H|HvGBSv2-6366_224980965+28	A/G	1	224980993	+	NA	NA	NA	NA	NA	NA	A	A	A	A	A	A	A	A	G	A	A	A	A	A	A	A	G	G	A	A	G	A	G	G	A	A	A	A	A	A	A	A	A	A	G	A	A	A	A
chr1H|HvGBSv2-6366_224980965+76	C/T	1	224981041	+	NA	NA	NA	NA	NA	NA	C	C	C	C	C	C	C	C	C	C	C	C	C	C	C	C	C	C	C	C	C	C	C	C	C	C	C	C	C	C	T	T	T	C	C	C	C	T	C
chr1H|HvGBSv2-281_225479483+15	C/A	1	225479498	+	NA	NA	NA	NA	NA	NA	C	C	C	C	C	C	C	C	C	C	C	C	C	C	C	C	C	C	C	C	C	C	C	C	C	C	C	C	C	C	A	A	A	C	C	C	C	A	C
chr1H|HvGBSv2-281_225479483+140	A/G	1	225479623	+	NA	NA	NA	NA	NA	NA	A	A	A	A	A	A	A	A	G	A	A	A	A	A	A	A	G	G	A	A	G	A	G	G	A	A	A	A	A	A	A	A	A	A	G	A	A	A	A
chr1H|HvGBSv2-283_227465707+146	T/G	1	227465853	+	NA	NA	NA	NA	NA	NA	T	T	T	T	T	T	T	T	G	T	T	T	T	T	T	T	G	G	T	T	G	T	G	G	T	T	T	T	T	T	T	T	T	T	G	T	T	T	T
chr1H|HvGBSv2-6369_227981607+61	G/A	1	227981668	+	NA	NA	NA	NA	NA	NA	G	G	G	G	G	G	G	G	G	G	G	G	G	G	G	G	G	G	G	G	G	G	G	G	G	G	G	G	G	G	A	A	A	G	G	G	G	A	G
chr1H|HvGBSv2-6369_227981607+132	G/A	1	227981739	+	NA	NA	NA	NA	NA	NA	G	G	G	G	G	G	G	G	G	G	G	G	G	G	G	G	G	G	G	G	G	G	G	G	G	G	G	G	G	G	A	A	A	G	G	G	G	A	G
chr1H|HvGBSv2-6370_228988458+9	A/C	1	228988467	+	NA	NA	NA	NA	NA	NA	A	C	A	A	A	A	A	A	A	A	A	A	A	A	A	A	A	A	A	A	A	A	A	A	A	A	A	A	A	A	A	A	A	A	A	A	A	A	A
chr1H|HvGBSv2-6370_228988458+78	A/G	1	228988536	+	NA	NA	NA	NA	NA	NA	A	A	A	A	A	A	A	A	A	A	A	A	A	A	A	A	A	A	A	A	A	A	A	A	A	A	A	A	A	A	A	A	A	A	A	A	A	A	A
chr1H|HvGBSv2-6371_230081937+76	C/T	1	230082013	+	NA	NA	NA	NA	NA	NA	C	C	C	C	C	C	C	C	T	C	C	C	C	C	C	C	T	T	C	C	T	C	T	T	C	C	C	C	C	C	C	C	C	C	T	C	C	C	C
chr1H|HvGBSv2-286_230456520+114	G/A	1	230456634	+	NA	NA	NA	NA	NA	NA	G	G	G	G	G	G	G	G	G	G	G	G	G	G	G	G	G	G	G	G	G	G	G	G	G	G	G	G	G	G	A	A	A	G	G	G	G	A	G
chr1H|HvGBSv2-287_231489712+62	G/C	1	231489774	+	NA	NA	NA	NA	NA	NA	G	G	G	G	G	G	G	G	C	G	G	G	G	G	G	G	C	C	G	G	C	G	C	C	G	G	G	G	G	G	G	G	G	G	C	G	G	G	G
chr1H|HvGBSv2-287_231489712+155	G/A	1	231489867	+	NA	NA	NA	NA	NA	NA	G	G	G	G	G	G	G	G	G	G	G	G	G	G	G	G	G	G	G	G	G	G	G	G	G	G	G	G	G	G	A	A	A	G	G	G	G	A	G
chr1H|HvGBSv2-6373_231982238+125	A/G	1	231982363	+	NA	NA	NA	NA	NA	NA	A	A	A	A	A	A	A	A	G	A	G	A	A	A	A	A	G	G	A	A	G	A	G	G	A	A	A	A	A	A	A	A	A	A	G	A	A	A	A
chr1H|HvGBSv2-6375_234013391+39	A/C	1	234013430	+	NA	NA	NA	NA	NA	NA	A	A	A	A	A	A	A	A	C	A	A	A	A	A	A	A	C	C	A	A	C	A	C	C	A	A	A	A	A	A	A	A	A	A	C	A	A	A	A
chr1H|HvGBSv2-6376_235005256+138	T/A	1	235005394	+	NA	NA	NA	NA	NA	NA	T	T	T	T	T	T	T	T	T	T	T	T	T	T	T	T	T	T	T	T	T	T	T	T	T	T	T	T	T	T	A	A	A	T	T	T	T	A	T
chr1H|HvGBSv2-8700_235520356+40	A/G	1	235520396	+	NA	NA	NA	NA	NA	NA	A	A	A	A	A	A	A	A	A	A	A	A	A	A	A	A	A	A	A	A	A	A	A	A	A	A	A	A	A	A	G	G	G	A	A	A	A	A	A
chr1H|HvGBSv2-6378_237003273+61	A/G	1	237003334	+	NA	NA	NA	NA	NA	NA	A	A	A	A	A	A	A	A	A	A	A	A	A	A	A	A	A	A	A	A	A	A	A	G	A	A	A	A	A	A	A	R	A	A	A	A	A	A	A
chr1H|HvGBSv2-293_237513778+120	A/T	1	237513898	+	NA	NA	NA	NA	NA	NA	A	A	A	A	A	A	A	A	T	A	T	A	A	A	A	A	T	T	A	A	T	A	T	T	A	A	A	A	A	A	A	A	A	A	T	A	A	A	A
chr1H|HvGBSv2-6379_237993820+149	G/C	1	237993969	+	NA	NA	NA	NA	NA	NA	G	G	G	G	G	G	G	G	G	G	G	G	G	G	G	G	G	G	G	G	G	G	G	G	G	G	G	G	G	G	G	G	G	G	G	G	G	G	G
chr1H|HvGBSv2-6380_239037313+15	G/A	1	239037328	+	NA	NA	NA	NA	NA	NA	G	G	G	G	A	G	A	G	G	A	G	G	G	A	G	G	G	G	A	A	G	G	G	G	G	G	G	G	G	G	G	G	G	G	G	G	G	G	G
chr1H|HvGBSv2-6380_239037313+19	C/T	1	239037332	+	NA	NA	NA	NA	NA	NA	C	C	C	C	C	C	C	C	C	C	C	C	C	C	C	C	C	C	C	C	C	C	C	C	C	C	C	C	C	C	C	C	C	C	C	C	C	T	C
chr1H|HvGBSv2-6380_239037313+154	A/G	1	239037467	+	NA	NA	NA	NA	NA	NA	A	A	A	A	A	A	A	A	G	A	A	A	A	A	A	A	G	G	A	A	G	A	G	G	A	A	A	A	A	A	A	A	A	A	G	A	A	A	A
chr1H|HvGBSv2-295_239492745+78	A/T	1	239492823	+	NA	NA	NA	NA	NA	NA	A	A	A	A	A	A	A	A	T	A	A	A	A	A	A	A	T	A	A	A	A	A	T	T	A	A	A	A	A	A	A	A	A	A	T	A	A	A	A
chr1H|HvGBSv2-6381_240000096+27	A/C	1	240000123	+	NA	NA	NA	NA	NA	NA	A	A	A	A	A	A	A	A	A	A	A	A	A	A	A	A	A	A	A	A	A	A	A	A	A	A	A	A	A	A	A	A	A	A	A	A	A	C	A
chr1H|HvGBSv2-6381_240000096+67	A/C	1	240000163	+	NA	NA	NA	NA	NA	NA	A	A	A	A	A	A	A	A	C	A	C	A	A	A	A	A	C	C	A	A	C	A	C	C	A	A	A	A	A	A	A	A	A	A	C	A	A	A	A
chr1H|HvGBSv2-6382_241052398+104	C/T	1	241052502	+	NA	NA	NA	NA	NA	NA	C	C	C	C	C	C	C	C	T	C	C	C	C	C	C	C	T	T	C	C	T	C	T	T	C	C	C	C	C	C	C	C	C	C	T	C	C	C	C
chr1H|HvGBSv2-298_242497614+8	T/A	1	242497622	+	NA	NA	NA	NA	NA	NA	T	T	T	T	T	T	T	T	T	T	T	T	T	T	T	T	T	T	T	T	T	T	T	T	T	T	T	T	T	T	T	T	T	T	T	T	T	T	T
chr1H|HvGBSv2-298_242497614+139	G/C	1	242497753	+	NA	NA	NA	NA	NA	NA	G	G	G	G	G	G	G	G	G	G	G	G	G	G	G	G	G	G	G	G	G	G	G	G	G	G	G	G	G	G	C	C	C	G	G	G	C	C	G
chr1H|HvGBSv2-6384_242997384+105	C/T	1	242997489	+	NA	NA	NA	NA	NA	NA	C	C	C	C	C	C	C	C	C	C	C	C	C	C	C	C	C	C	C	C	C	C	C	C	C	C	C	C	C	C	T	T	T	C	C	C	T	T	C
chr1H|HvGBSv2-299_243550453+128	G/T	1	243550581	+	NA	NA	NA	NA	NA	NA	G	G	G	G	G	G	G	G	T	G	G	G	G	G	G	G	T	T	G	G	T	G	T	T	G	G	G	G	G	G	G	G	G	G	T	G	G	G	G
chr1H|HvGBSv2-6385_243997108+140	A/G	1	243997248	+	NA	NA	NA	NA	NA	NA	A	A	A	A	A	A	A	A	G	A	G	A	A	A	A	A	G	G	A	A	G	A	G	G	A	A	A	A	A	A	A	A	A	A	G	A	A	A	A
chr1H|HvGBSv2-6385_243997108+181	A/G	1	243997289	+	NA	NA	NA	NA	NA	NA	A	G	A	A	A	G	A	A	A	A	A	G	A	A	A	A	A	A	A	A	A	A	A	A	G	G	G	A	A	A	G	G	G	G	A	A	G	A	G
chr1H|HvGBSv2-6386_244970841+26	A/G	1	244970867	+	NA	NA	NA	NA	NA	NA	A	A	A	A	A	A	A	A	G	A	A	A	A	A	A	A	G	G	A	A	G	A	G	G	A	A	A	A	A	A	A	A	A	A	G	A	A	A	A
chr1H|HvGBSv2-6387_246004392+122	G/C	1	246004514	+	NA	NA	NA	NA	NA	NA	G	C	G	G	G	C	G	G	G	G	G	C	G	G	G	G	G	G	G	G	G	G	G	G	C	C	C	G	G	G	C	C	C	C	G	G	C	C	C
chr1H|HvGBSv2-6388_247006972+37	T/C	1	247007009	+	NA	NA	NA	NA	NA	NA	T	T	T	T	T	T	T	T	C	T	T	T	T	T	T	T	C	C	T	T	C	T	C	C	T	T	T	T	T	T	T	T	T	T	C	T	T	T	T
chr1H|HvGBSv2-6388_247006972+128	C/G	1	247007100	+	NA	NA	NA	NA	NA	NA	C	G	C	C	C	G	C	C	C	C	C	G	C	C	C	C	C	C	C	C	C	C	C	C	G	G	G	C	C	C	G	G	G	G	C	C	G	C	G
chr1H|HvGBSv2-303_247505420+85	T/C	1	247505505	+	NA	NA	NA	NA	NA	NA	T	C	T	T	T	C	T	T	T	T	T	C	T	T	T	T	T	T	T	T	T	T	T	T	C	C	C	T	T	T	C	C	C	C	T	T	C	T	C
chr1H|HvGBSv2-303_247505420+100	G/A	1	247505520	+	NA	NA	NA	NA	NA	NA	G	G	G	G	G	G	G	G	A	G	G	G	G	G	G	G	A	A	G	G	A	G	A	A	G	G	G	G	G	G	G	G	G	G	A	G	G	G	G
chr1H|HvGBSv2-303_247505685+48	C/T	1	247505733	+	NA	NA	NA	NA	NA	NA	C	T	C	C	C	T	C	C	C	C	C	T	C	C	C	C	C	C	C	C	C	C	C	C	T	T	T	C	C	C	T	T	T	T	C	C	T	C	T
chr1H|HvGBSv2-303_247505685+51	A/G	1	247505736	+	NA	NA	NA	NA	NA	NA	A	A	A	A	A	A	A	A	A	A	A	A	A	A	A	A	A	A	A	A	A	A	A	A	A	A	A	A	A	A	A	A	A	A	A	A	A	A	A
chr1H|HvGBSv2-303_247505685+172	C/T	1	247505857	+	NA	NA	NA	NA	NA	NA	C	T	C	C	C	T	C	C	C	C	C	T	C	C	C	C	C	C	C	C	C	C	C	C	T	T	T	C	C	C	T	T	T	T	C	C	T	T	T
chr1H|HvGBSv2-303_247592584+48	C/T	1	247592632	+	NA	NA	NA	NA	NA	NA	C	T	C	C	C	T	C	C	C	C	C	T	C	C	C	C	C	C	C	C	C	C	C	C	T	T	T	C	C	C	T	T	T	T	C	C	T	C	T
chr1H|HvGBSv2-303_247592584+51	A/G	1	247592635	+	NA	NA	NA	NA	NA	NA	A	A	A	A	A	A	A	A	A	A	A	A	A	A	A	A	A	A	A	A	A	A	A	A	A	A	A	A	A	A	A	A	A	A	A	A	A	A	A
chr1H|HvGBSv2-303_247592584+172	C/T	1	247592756	+	NA	NA	NA	NA	NA	NA	C	T	C	C	C	T	C	C	C	C	C	T	C	C	C	C	C	C	C	C	C	C	C	C	T	T	T	C	C	C	T	T	T	T	C	C	T	T	T
chr1H|HvGBSv2-6389_248004412+55	G/T	1	248004467	+	NA	NA	NA	NA	NA	NA	G	T	G	G	G	T	G	G	G	G	G	T	G	G	G	G	G	G	G	G	G	G	G	G	T	T	T	G	G	G	T	T	T	T	G	G	T	T	T
chr1H|HvGBSv2-6389_248004412+157	A/G	1	248004569	+	NA	NA	NA	NA	NA	NA	A	G	A	A	A	G	A	A	A	A	A	G	A	A	A	A	A	A	A	A	A	A	A	A	G	G	G	A	A	A	G	G	G	G	A	A	G	A	G
chr1H|HvGBSv2-6390_248953319+163	G/A	1	248953482	+	NA	NA	NA	NA	NA	NA	G	A	G	G	G	A	G	G	G	G	G	A	G	G	G	G	G	G	G	G	G	G	G	G	A	A	A	G	G	G	A	A	A	A	G	G	A	G	A
chr1H|HvGBSv2-305_249451951+173	A/G	1	249452124	+	NA	NA	NA	NA	NA	NA	A	A	A	A	A	A	A	A	G	A	A	A	A	A	A	A	G	G	A	A	G	A	G	G	A	A	A	A	A	A	A	A	A	A	G	A	A	A	A
chr1H|HvGBSv2-6391_249988014+115	G/A	1	249988129	+	NA	NA	NA	NA	NA	NA	G	A	G	G	G	A	G	G	G	G	G	A	G	G	G	G	G	G	G	G	G	G	G	G	A	A	A	G	G	G	A	A	A	A	G	G	A	A	A
chr1H|HvGBSv2-306_250478620+14	T/G	1	250478634	+	NA	NA	NA	NA	NA	NA	T	T	T	T	T	T	T	T	T	T	T	T	T	T	T	T	T	T	T	T	T	T	T	T	T	T	T	T	T	T	T	T	T	T	T	T	T	G	T
chr1H|HvGBSv2-306_250478620+107	T/C	1	250478727	+	NA	NA	NA	NA	NA	NA	T	T	T	T	T	T	T	T	C	T	T	T	T	T	T	T	C	C	T	T	C	T	C	C	T	T	T	T	T	T	T	T	T	T	C	T	T	T	T
chr1H|HvGBSv2-6392_251006214+74	T/C	1	251006288	+	NA	NA	NA	NA	NA	NA	T	C	T	T	T	C	T	T	T	T	T	C	T	T	T	T	T	T	T	T	T	T	T	T	C	C	C	T	T	T	C	C	C	C	T	T	C	T	C
chr1H|HvGBSv2-6394_253945466+46	C/T	1	253945512	+	NA	NA	NA	NA	NA	NA	C	T	C	C	C	T	C	C	C	C	C	T	C	C	C	C	C	C	C	C	C	C	C	C	T	T	T	C	C	C	T	T	T	T	C	C	T	C	T
chr1H|HvGBSv2-6394_253945466+162	A/T	1	253945628	+	NA	NA	NA	NA	NA	NA	A	A	A	A	A	A	A	A	T	A	A	A	A	A	A	A	T	T	A	A	T	A	T	T	A	A	A	A	A	A	A	A	A	A	T	A	A	A	A
chr1H|HvGBSv2-6395_254998152+35	G/C	1	254998187	+	NA	NA	NA	NA	NA	NA	G	C	G	G	G	C	G	G	G	G	G	C	G	G	G	G	G	G	G	G	G	G	G	G	C	C	C	G	G	G	C	C	C	C	G	G	C	C	C
chr1H|HvGBSv2-311_255494159+20	C/G	1	255494179	+	NA	NA	NA	NA	NA	NA	C	G	C	C	C	G	C	C	C	C	C	G	C	C	C	C	C	C	C	C	C	C	C	C	G	G	G	C	C	C	G	G	G	G	C	C	G	C	G
chr1H|HvGBSv2-312_256510053+99	G/A	1	256510152	+	NA	NA	NA	NA	NA	NA	G	A	G	G	G	A	G	G	G	G	G	A	G	G	G	G	G	G	G	G	G	G	G	G	A	A	A	G	G	G	A	A	A	A	G	G	A	G	A
chr1H|HvGBSv2-312_256510053+154	A/G	1	256510207	+	NA	NA	NA	NA	NA	NA	A	A	A	A	A	A	A	A	G	A	A	A	A	A	A	A	G	G	A	A	G	A	G	G	A	A	A	A	A	A	A	A	A	A	G	A	A	A	A
chr1H|HvGBSv2-6397_257073954+28	T/C	1	257073982	+	NA	NA	NA	NA	NA	NA	T	T	T	T	T	T	T	T	T	T	T	C	T	T	T	T	T	T	T	T	T	T	T	T	C	T	T	T	T	T	T	T	T	C	T	T	T	T	T
chr1H|HvGBSv2-314_258512157+44	A/G	1	258512201	+	NA	NA	NA	NA	NA	NA	A	A	A	A	A	A	A	A	G	A	A	A	A	A	A	A	G	G	A	A	G	A	G	G	A	A	A	A	A	A	A	A	A	A	G	A	A	A	A
chr1H|HvGBSv2-314_258512157+178	A/G	1	258512335	+	NA	NA	NA	NA	NA	NA	A	A	A	A	G	A	G	A	A	G	A	A	A	G	A	A	A	A	G	G	A	A	A	A	A	A	A	A	A	A	A	A	A	A	A	A	A	A	A
chr1H|HvGBSv2-6399_259115186+38	A/G	1	259115224	+	NA	NA	NA	NA	NA	NA	A	A	A	A	A	A	A	A	G	A	A	A	A	A	A	A	G	G	A	A	G	A	G	G	A	A	A	A	A	A	A	A	A	A	G	A	A	A	A
chr1H|HvGBSv2-6399_259115186+102	A/G	1	259115288	+	NA	NA	NA	NA	NA	NA	A	G	A	A	A	G	A	A	A	A	A	G	A	A	A	A	A	A	A	A	A	A	A	A	G	G	G	A	A	A	G	G	G	G	A	A	G	A	G
chr1H|HvGBSv2-6400_260015914+31	G/A	1	260015945	+	NA	NA	NA	NA	NA	NA	G	A	G	G	G	A	G	G	G	G	G	A	G	G	G	G	G	G	G	G	G	G	G	G	A	A	A	G	G	G	A	A	A	A	G	G	A	G	A
chr1H|HvGBSv2-6400_260015914+68	T/G	1	260015982	+	NA	NA	NA	NA	NA	NA	T	T	T	T	T	T	T	T	T	T	T	T	T	T	T	T	T	T	T	T	T	T	T	T	T	T	T	T	T	T	T	T	T	T	T	T	T	G	T
chr1H|HvGBSv2-6401_261022167+43	G/A	1	261022210	+	NA	NA	NA	NA	NA	NA	G	A	G	G	G	A	G	G	G	G	G	A	G	G	G	G	G	G	G	G	G	G	G	G	A	A	A	G	G	G	A	A	A	A	G	G	A	A	A
chr1H|HvGBSv2-6401_261022167+59	T/G	1	261022226	+	NA	NA	NA	NA	NA	NA	T	T	T	T	T	T	T	T	G	T	T	T	T	T	T	T	G	G	T	T	G	T	G	G	T	T	T	T	T	T	T	T	T	T	G	T	T	T	T
chr1H|HvGBSv2-6401_261022167+63	T/C	1	261022230	+	NA	NA	NA	NA	NA	NA	T	T	T	T	T	T	T	T	T	T	T	T	T	T	T	T	T	T	T	T	T	T	T	T	T	T	T	T	T	T	T	T	T	T	T	T	T	C	T
chr1H|HvGBSv2-6401_261022167+110	C/T	1	261022277	+	NA	NA	NA	NA	NA	NA	C	T	C	C	C	T	C	C	C	C	C	T	C	C	C	C	C	C	C	C	C	C	C	C	T	T	T	C	C	C	T	T	T	T	C	C	T	T	T
chr1H|HvGBSv2-6402_262060386+19	A/G	1	262060405	+	NA	NA	NA	NA	NA	NA	A	A	A	A	A	A	A	A	A	A	A	A	A	A	A	A	A	A	A	A	A	A	A	A	A	A	A	A	A	A	R	A	A	R	A	A	A	A	A
chr1H|HvGBSv2-6402_262060386+37	C/G	1	262060423	+	NA	NA	NA	NA	NA	NA	C	C	C	C	C	C	C	C	C	C	C	C	C	C	C	C	C	C	C	C	C	C	C	C	C	C	C	C	C	C	S	C	C	S	C	C	C	C	C
chr1H|HvGBSv2-6402_262060386+51	T/C	1	262060437	+	NA	NA	NA	NA	NA	NA	T	T	T	T	T	T	T	T	T	T	T	T	T	T	T	T	T	T	T	T	T	T	T	T	T	T	T	T	T	T	Y	T	T	Y	T	T	T	T	T
chr1H|HvGBSv2-6402_262060386+61	A/G	1	262060447	+	NA	NA	NA	NA	NA	NA	A	A	A	A	A	A	A	A	A	A	A	A	A	A	A	A	A	A	A	A	A	A	A	A	A	A	A	A	A	A	R	A	A	R	A	A	A	A	A
chr1H|HvGBSv2-6402_262060386+73	T/A	1	262060459	+	NA	NA	NA	NA	NA	NA	T	T	T	T	T	T	T	T	T	T	T	T	T	T	T	T	T	T	T	T	T	T	T	T	T	T	T	T	T	T	W	T	T	W	T	T	T	T	T
chr1H|HvGBSv2-6402_262060386+87	T/A	1	262060473	+	NA	NA	NA	NA	NA	NA	T	T	T	T	T	T	T	T	T	T	T	T	T	T	T	T	T	T	T	T	T	T	T	T	T	T	T	T	T	T	W	T	T	W	T	T	T	T	T
chr1H|HvGBSv2-6402_262060386+138	G/A	1	262060524	+	NA	NA	NA	NA	NA	NA	G	G	G	G	G	G	G	G	G	G	G	G	G	G	G	G	G	G	G	G	G	G	G	G	G	G	G	G	G	G	R	G	G	R	G	G	G	G	G
chr1H|HvGBSv2-6402_262060386+141	A/G	1	262060527	+	NA	NA	NA	NA	NA	NA	A	A	A	A	A	A	A	A	A	A	A	A	A	A	A	A	A	A	A	A	A	A	A	A	A	A	A	A	A	A	R	A	A	R	A	A	A	A	A
chr1H|HvGBSv2-6403_262989216+76	G/T	1	262989292	+	NA	NA	NA	NA	NA	NA	G	T	G	G	G	T	G	G	G	G	G	T	G	G	G	G	G	G	G	G	G	G	G	G	T	T	T	G	G	G	T	T	T	T	G	G	T	K	T
chr1H|HvGBSv2-6403_262989216+136	A/C	1	262989352	+	NA	NA	NA	NA	NA	NA	A	A	A	A	A	A	A	A	A	A	A	A	A	A	A	A	A	A	A	A	A	A	M	A	A	A	A	A	A	A	A	A	A	A	A	A	A	A	A
chr1H|HvGBSv2-6403_262989216+138	A/G	1	262989354	+	NA	NA	NA	NA	NA	NA	A	A	A	A	A	A	A	A	G	A	A	A	A	A	A	A	G	G	A	A	G	A	G	G	A	A	A	A	A	A	A	A	A	A	G	A	A	A	A
chr1H|HvGBSv2-6404_264010382+19	A/G	1	264010401	+	NA	NA	NA	NA	NA	NA	A	A	A	A	A	A	A	A	A	A	A	A	A	A	A	A	A	A	A	A	A	A	A	A	A	A	A	A	G	G	A	A	A	A	A	A	A	A	A
chr1H|HvGBSv2-6405_264929029+69	A/C	1	264929098	+	NA	NA	NA	NA	NA	NA	A	C	A	A	A	C	A	A	A	A	C	C	A	A	A	A	A	A	A	A	A	A	A	A	C	C	C	A	A	A	C	C	C	C	A	A	C	A	C
chr1H|HvGBSv2-321_265504335+8	C/T	1	265504343	+	NA	NA	NA	NA	NA	NA	C	C	C	C	C	C	C	C	T	C	C	C	C	C	C	C	T	C	C	C	C	C	C	T	C	C	C	C	C	C	C	C	C	C	C	C	C	C	C
chr1H|HvGBSv2-6406_265963924+59	A/G	1	265963983	+	NA	NA	NA	NA	NA	NA	A	A	A	A	A	A	A	A	G	A	A	A	A	A	A	A	G	G	A	A	G	A	G	G	G	A	A	A	A	A	A	A	A	A	G	A	A	A	A
chr1H|HvGBSv2-6406_265963924+135	A/C	1	265964059	+	NA	NA	NA	NA	NA	NA	A	A	A	A	C	A	C	A	A	C	A	A	A	C	A	A	A	A	C	C	A	A	A	A	A	A	A	A	A	A	A	A	A	A	A	A	A	A	A
chr1H|HvGBSv2-322_266463247+27	A/G	1	266463274	+	NA	NA	NA	NA	NA	NA	A	G	A	A	A	G	A	A	A	A	G	G	A	A	A	A	A	A	A	A	A	A	A	A	G	G	G	A	A	A	G	G	G	G	A	A	G	A	G
chr1H|HvGBSv2-322_266463247+47	A/C	1	266463294	+	NA	NA	NA	NA	NA	NA	A	C	A	A	A	C	A	A	A	A	C	C	A	A	A	A	A	A	A	A	A	A	A	A	C	C	C	A	A	A	C	C	C	C	A	A	C	A	C
chr1H|HvGBSv2-322_266463247+143	C/G	1	266463390	+	NA	NA	NA	NA	NA	NA	C	C	C	C	C	C	C	C	G	C	C	C	C	C	C	C	G	C	C	C	C	C	C	G	C	C	C	C	C	C	C	C	C	C	C	C	C	C	C
chr1H|HvGBSv2-6407_267017916+64	G/A	1	267017980	+	NA	NA	NA	NA	NA	NA	G	A	G	G	G	A	G	G	G	G	A	A	G	G	G	G	G	G	G	G	G	G	G	G	A	A	A	G	G	G	A	A	A	A	G	G	A	G	A
chr1H|HvGBSv2-6407_267017916+102	C/G	1	267018018	+	NA	NA	NA	NA	NA	NA	C	G	C	C	C	G	C	C	C	C	G	G	C	C	C	C	C	C	C	C	C	C	C	C	G	G	G	C	C	C	G	G	G	G	C	C	G	C	G
chr1H|HvGBSv2-6407_267017916+117	T/C	1	267018033	+	NA	NA	NA	NA	NA	NA	T	C	T	T	T	C	T	T	T	T	C	C	T	T	T	T	T	T	T	T	T	T	T	T	C	C	C	T	T	T	C	C	C	C	T	T	C	T	C
chr1H|HvGBSv2-323_267487804+25	G/C	1	267487829	+	NA	NA	NA	NA	NA	NA	G	C	G	G	G	C	G	G	G	G	C	C	G	G	G	G	G	G	G	G	G	G	G	G	C	C	C	G	G	G	C	C	C	C	G	G	C	G	C
chr1H|HvGBSv2-323_267487804+80	T/C	1	267487884	+	NA	NA	NA	NA	NA	NA	T	T	C	C	T	T	T	T	T	T	T	T	T	T	T	T	T	T	T	T	T	C	T	T	T	T	T	T	T	T	T	T	T	T	T	T	T	T	T
chr1H|HvGBSv2-323_267487804+86	A/T	1	267487890	+	NA	NA	NA	NA	NA	NA	A	T	A	A	A	T	A	A	A	A	T	T	A	A	A	A	A	A	A	A	A	A	A	A	T	T	T	A	A	A	T	T	T	T	A	A	T	A	T
chr1H|HvGBSv2-323_267487804+97	T/A	1	267487901	+	NA	NA	NA	NA	NA	NA	T	T	T	T	T	T	T	T	A	T	T	T	T	T	T	T	A	T	T	T	T	T	T	A	T	T	T	T	T	T	T	T	T	T	T	T	T	T	T
chr1H|HvGBSv2-324_268495258+4	G/C	1	268495262	+	NA	NA	NA	NA	NA	NA	G	G	G	G	G	G	G	G	C	G	G	G	G	G	G	G	C	C	G	G	C	G	C	C	G	G	G	G	G	G	G	G	G	G	C	G	G	S	G
chr1H|HvGBSv2-324_268495258+7	A/G	1	268495265	+	NA	NA	NA	NA	NA	NA	A	A	A	A	A	A	A	A	A	A	A	A	A	A	A	A	A	A	A	A	A	A	A	A	A	A	A	A	A	A	A	A	A	A	A	A	A	R	A
chr1H|HvGBSv2-324_268495258+76	C/T	1	268495334	+	NA	NA	NA	NA	NA	NA	C	T	C	C	C	T	C	C	C	C	T	T	C	C	C	C	C	C	C	C	C	C	C	C	T	T	T	C	C	C	T	T	T	T	C	C	T	C	T
chr1H|HvGBSv2-6409_269033976+122	A/G	1	269034098	+	NA	NA	NA	NA	NA	NA	A	G	A	A	A	G	A	A	A	A	G	G	A	A	A	A	A	A	A	A	A	A	A	A	G	G	G	A	A	A	G	G	G	G	A	A	G	A	G
chr1H|HvGBSv2-6409_269033976+163	T/C	1	269034139	+	NA	NA	NA	NA	NA	NA	T	C	T	T	T	C	T	T	T	T	C	C	T	T	T	T	T	T	T	T	T	T	T	T	C	C	C	T	T	T	C	C	C	C	T	T	C	T	C
chr1H|HvGBSv2-325_269484512+101	A/G	1	269484613	+	NA	NA	NA	NA	NA	NA	A	G	A	A	A	G	A	A	A	A	G	G	A	A	A	A	A	A	A	A	A	A	A	A	G	G	G	A	A	A	G	G	G	G	A	A	G	A	G
chr1H|HvGBSv2-325_269484512+147	T/G	1	269484659	+	NA	NA	NA	NA	NA	NA	T	T	T	T	T	T	T	T	G	T	T	T	T	T	T	T	G	G	T	T	G	T	G	G	T	T	T	T	T	T	T	T	T	T	G	T	T	T	T
chr1H|HvGBSv2-325_269484512+160	T/C	1	269484672	+	NA	NA	NA	NA	NA	NA	T	C	T	T	T	C	T	T	T	T	C	C	T	T	T	T	T	T	T	T	T	T	T	T	C	C	C	T	T	T	C	C	C	C	T	T	C	T	C
chr1H|HvGBSv2-325_269484512+161	C/T	1	269484673	+	NA	NA	NA	NA	NA	NA	C	T	C	C	C	T	C	C	C	C	T	T	C	C	C	C	C	C	C	C	C	C	C	C	T	T	T	C	C	C	T	T	T	T	C	C	T	C	T
chr1H|HvGBSv2-6410_270033415+93	A/G	1	270033508	+	NA	NA	NA	NA	NA	NA	A	A	A	A	A	A	A	A	G	A	A	A	A	A	A	A	G	G	A	A	G	A	G	G	A	A	A	A	A	A	A	A	A	A	G	A	A	A	A
chr1H|HvGBSv2-6410_270033415+128	T/C	1	270033543	+	NA	NA	NA	NA	NA	NA	T	T	T	T	T	T	T	T	T	T	T	T	T	T	T	T	T	T	T	T	T	T	T	T	T	T	T	T	T	T	T	T	T	T	T	T	T	C	T
chr1H|HvGBSv2-6410_270033415+148	C/T	1	270033563	+	NA	NA	NA	NA	NA	NA	C	T	C	C	C	T	C	C	C	C	T	T	C	C	C	C	C	C	C	C	C	C	C	C	T	T	T	C	C	C	T	T	T	T	C	C	T	C	T
chr1H|HvGBSv2-6410_270033415+154	C/T	1	270033569	+	NA	NA	NA	NA	NA	NA	C	T	C	C	C	T	C	C	C	C	T	T	C	C	C	C	C	C	C	C	C	C	C	C	T	T	T	C	C	C	T	T	T	T	C	C	T	T	T
chr1H|HvGBSv2-326_270476384+31	C/T	1	270476415	+	NA	NA	NA	NA	NA	NA	C	T	C	C	C	T	C	C	C	C	T	T	C	C	C	C	C	C	C	C	C	C	C	C	T	T	T	C	C	C	T	T	T	T	C	C	T	C	T
chr1H|HvGBSv2-326_270476384+134	A/G	1	270476518	+	NA	NA	NA	NA	NA	NA	A	G	A	A	A	G	A	A	A	A	G	G	A	A	A	A	A	A	A	A	A	A	A	A	G	G	G	A	A	A	G	G	G	G	A	A	G	A	G
chr1H|HvGBSv2-6411_271006542+6	C/A	1	271006548	+	NA	NA	NA	NA	NA	NA	C	C	A	A	A	C	A	A	C	A	C	C	C	A	C	A	C	C	A	A	C	A	C	C	C	C	C	A	A	A	C	C	C	C	C	C	C	C	C
chr1H|HvGBSv2-6411_271006542+17	T/G	1	271006559	+	NA	NA	NA	NA	NA	NA	G	T	T	T	T	T	T	T	G	T	T	T	G	T	G	T	G	G	T	T	G	T	G	G	T	T	T	T	T	T	T	T	T	T	G	G	T	T	T
chr1H|HvGBSv2-6411_271006542+76	T/G	1	271006618	+	NA	NA	NA	NA	NA	NA	T	G	T	T	T	G	T	T	T	T	G	G	T	T	T	T	T	T	T	T	T	T	T	T	G	G	G	T	T	T	G	G	G	G	T	T	G	T	G
chr1H|HvGBSv2-6411_271006542+93	C/T	1	271006635	+	NA	NA	NA	NA	NA	NA	C	T	C	C	C	T	C	C	C	C	T	T	C	C	C	C	C	C	C	C	C	C	C	C	T	T	T	C	C	C	T	T	T	T	C	C	T	C	T
chr1H|HvGBSv2-6412_271973785+86	A/G	1	271973871	+	NA	NA	NA	NA	NA	NA	A	A	A	A	A	A	A	A	G	A	A	A	A	A	A	A	G	G	A	A	G	A	G	G	A	A	A	A	A	A	A	A	A	A	G	A	A	A	A
chr1H|HvGBSv2-6412_271973785+103	A/G	1	271973888	+	NA	NA	NA	NA	NA	NA	A	G	A	A	A	G	A	A	A	A	G	G	A	A	A	A	A	A	A	A	A	A	A	A	G	G	G	A	A	A	G	G	G	G	A	A	G	A	G
chr1H|HvGBSv2-6412_271973785+106	T/C	1	271973891	+	NA	NA	NA	NA	NA	NA	C	T	T	T	T	T	T	T	C	T	T	T	C	T	C	T	C	C	T	T	C	T	C	C	T	T	T	T	T	T	T	T	T	T	C	C	T	T	T
chr1H|HvGBSv2-329_273516822+23	C/A	1	273516845	+	NA	NA	NA	NA	NA	NA	C	C	C	C	C	M	C	C	C	C	C	C	C	C	C	C	C	C	C	C	C	C	C	C	C	C	C	C	C	C	C	M	C	C	C	C	C	C	C
chr1H|HvGBSv2-329_273516822+50	A/T	1	273516872	+	NA	NA	NA	NA	NA	NA	T	A	A	A	A	A	A	A	T	A	A	A	A	A	A	A	T	T	A	A	T	A	T	T	A	A	A	A	A	A	A	A	A	A	T	A	A	A	A
chr1H|HvGBSv2-329_273516822+125	C/G	1	273516947	+	NA	NA	NA	NA	NA	NA	C	C	C	C	C	C	C	C	C	C	C	C	C	C	C	C	C	C	C	C	C	C	C	C	C	C	C	C	C	C	C	C	C	C	C	C	C	G	C
chr1H|HvGBSv2-6414_274027985+80	T/G	1	274028065	+	NA	NA	NA	NA	NA	NA	T	T	T	T	T	T	T	T	G	T	T	T	T	T	T	T	G	T	T	T	T	T	T	G	T	T	T	T	T	T	T	T	T	T	T	T	T	T	T
chr1H|HvGBSv2-6415_274944429+151	T/C	1	274944580	+	NA	NA	NA	NA	NA	NA	T	T	T	T	T	T	T	T	C	T	T	T	T	T	T	T	C	C	T	T	C	T	C	C	T	T	T	T	T	T	T	T	T	T	C	T	T	T	T
chr1H|HvGBSv2-331_275505160+48	A/G	1	275505208	+	NA	NA	NA	NA	NA	NA	A	G	A	A	A	G	A	A	A	A	G	G	A	A	A	A	A	A	A	A	A	A	A	A	G	G	G	A	A	A	G	G	G	G	A	A	G	A	G
chr1H|HvGBSv2-331_275505160+49	T/C	1	275505209	+	NA	NA	NA	NA	NA	NA	T	T	T	T	T	T	T	T	C	T	T	T	T	T	T	T	C	C	T	T	C	T	C	C	T	T	T	T	T	T	T	T	T	T	C	T	T	T	T
chr1H|HvGBSv2-331_275505160+81	G/C	1	275505241	+	NA	NA	NA	NA	NA	NA	G	G	G	G	G	G	G	G	G	G	G	G	G	G	G	G	G	G	G	G	G	G	G	G	G	G	G	G	G	G	G	G	G	G	G	G	G	C	G
chr1H|HvGBSv2-6416_275964256+89	A/C	1	275964345	+	NA	NA	NA	NA	NA	NA	A	A	A	A	A	A	A	A	C	A	A	A	A	A	A	A	C	A	A	A	A	A	A	C	A	A	A	A	A	A	A	A	A	A	A	A	A	A	A
chr1H|HvGBSv2-6416_275964256+127	A/G	1	275964383	+	NA	NA	NA	NA	NA	NA	A	A	A	A	A	A	A	A	A	A	A	A	A	A	A	A	A	A	A	A	A	A	A	A	A	A	A	A	G	G	A	A	A	A	A	A	A	A	A
chr1H|HvGBSv2-333_277494105+9	G/A	1	277494114	+	NA	NA	NA	NA	NA	NA	G	G	A	A	A	G	A	A	G	A	G	G	A	A	A	A	G	G	A	A	G	A	G	G	G	G	G	A	A	A	G	G	G	G	G	A	G	G	G
chr1H|HvGBSv2-6418_278005532+88	T/C	1	278005620	+	NA	NA	NA	NA	NA	NA	T	T	T	T	T	T	T	T	C	T	T	T	T	T	T	T	C	C	T	T	C	T	C	C	T	T	T	T	T	T	T	T	T	T	C	T	T	T	T
chr1H|HvGBSv2-6419_279004457+7	C/T	1	279004464	+	NA	NA	NA	NA	NA	NA	C	C	T	T	T	C	T	T	C	T	C	C	T	T	T	T	C	C	T	T	C	T	C	C	C	C	C	T	T	T	C	C	C	C	C	T	C	C	C
chr1H|HvGBSv2-6419_279004457+59	T/C	1	279004516	+	NA	NA	NA	NA	NA	NA	T	T	T	T	T	T	T	T	C	T	T	T	T	T	T	T	C	C	T	T	C	T	C	C	T	T	T	T	T	T	T	T	T	T	C	T	T	T	T
chr1H|HvGBSv2-6419_279004457+72	C/G	1	279004529	+	NA	NA	NA	NA	NA	NA	C	C	C	C	C	C	C	C	C	C	C	C	C	C	C	C	C	C	C	C	C	C	C	C	C	C	C	C	C	C	C	C	C	C	C	C	C	G	C
chr1H|HvGBSv2-6419_279004457+134	T/C	1	279004591	+	NA	NA	NA	NA	NA	NA	T	T	T	T	T	T	T	T	C	T	T	T	T	T	T	T	C	C	T	T	C	T	C	C	T	T	T	T	T	T	T	T	T	T	C	T	T	T	T
chr1H|HvGBSv2-335_279524858+33	A/G	1	279524891	+	NA	NA	NA	NA	NA	NA	A	A	A	A	A	A	A	A	G	A	A	A	A	A	A	A	G	G	A	A	G	A	G	G	A	A	A	A	A	A	A	A	A	A	G	A	A	A	A
chr1H|HvGBSv2-335_279524858+36	G/C	1	279524894	+	NA	NA	NA	NA	NA	NA	G	C	G	G	G	C	G	G	G	G	C	C	G	G	G	G	G	G	G	G	G	G	G	G	C	C	C	G	G	G	C	C	C	C	G	G	C	G	C
chr1H|HvGBSv2-335_279524858+91	A/G	1	279524949	+	NA	NA	NA	NA	NA	NA	A	A	G	G	G	A	G	G	A	G	A	A	G	G	G	G	A	A	G	G	A	G	A	A	A	A	A	G	G	G	A	A	A	A	A	G	A	A	A
chr1H|HvGBSv2-335_279524858+112	C/T	1	279524970	+	NA	NA	NA	NA	NA	NA	C	T	C	C	C	T	C	C	C	C	T	T	C	C	C	C	C	C	C	C	C	C	C	C	T	T	T	C	C	C	T	T	T	T	C	C	T	C	T
chr1H|HvGBSv2-335_279524858+142	G/T	1	279525000	+	NA	NA	NA	NA	NA	NA	G	T	G	G	G	T	G	G	G	G	T	T	G	G	G	G	G	G	G	G	G	G	G	G	T	T	T	G	G	G	T	T	T	T	G	G	T	G	T
chr1H|HvGBSv2-6421_280996785+31	T/C	1	280996816	+	NA	NA	NA	NA	NA	NA	T	T	T	T	T	T	T	T	C	T	T	T	T	T	T	T	C	C	T	T	C	T	C	C	T	T	T	T	T	T	T	T	T	T	C	T	T	T	T
chr1H|HvGBSv2-6421_280996785+49	T/G	1	280996834	+	NA	NA	NA	NA	NA	NA	T	T	G	G	G	T	G	G	T	G	T	T	G	G	G	G	T	T	G	G	T	G	T	T	T	T	T	G	G	G	T	T	T	T	T	G	T	T	T
chr1H|HvGBSv2-6421_280996785+105	T/G	1	280996890	+	NA	NA	NA	NA	NA	NA	T	T	G	G	G	T	G	G	T	G	T	T	G	G	G	G	T	T	G	G	T	G	T	T	T	T	T	G	G	G	T	T	T	T	T	G	T	T	T
chr1H|HvGBSv2-6421_280996785+113	T/C	1	280996898	+	NA	NA	NA	NA	NA	NA	C	T	T	T	T	T	T	T	C	T	T	T	T	T	T	T	C	C	T	T	C	T	C	C	T	T	T	T	T	T	T	T	T	T	C	T	T	T	T
chr1H|HvGBSv2-6421_280996785+122	G/T	1	280996907	+	NA	NA	NA	NA	NA	NA	G	T	G	G	G	T	G	G	G	G	T	T	G	G	G	G	G	G	G	G	G	G	G	G	T	T	T	G	G	G	T	T	T	T	G	G	T	G	T
chr1H|HvGBSv2-6421_280996785+138	A/G	1	280996923	+	NA	NA	NA	NA	NA	NA	A	G	A	A	A	G	A	A	A	A	G	G	A	A	A	A	A	A	A	A	A	A	A	A	G	G	G	A	A	A	G	G	G	G	A	A	G	A	G
chr1H|HvGBSv2-336_281440211+148	T/G	1	281440359	+	NA	NA	NA	NA	NA	NA	T	G	T	T	T	G	T	T	T	T	G	G	T	T	T	T	T	T	T	T	T	T	T	T	G	G	G	T	T	T	G	G	G	G	T	T	G	T	G
chr1H|HvGBSv2-6422_281990828+10	T/G	1	281990838	+	NA	NA	NA	NA	NA	NA	G	T	T	T	T	T	T	T	G	T	T	T	T	T	T	T	G	G	T	T	G	T	G	G	T	T	T	T	T	T	T	T	T	T	G	T	T	G	T
chr1H|HvGBSv2-6422_281990828+113	A/G	1	281990941	+	NA	NA	NA	NA	NA	NA	A	A	A	A	A	A	A	A	G	A	A	A	A	A	A	A	G	G	A	A	G	A	G	G	A	A	A	A	A	A	A	A	A	A	G	A	A	A	A
chr1H|HvGBSv2-337_282557716+102	A/C	1	282557818	+	NA	NA	NA	NA	NA	NA	A	A	C	C	C	A	C	C	A	C	A	A	C	C	C	C	A	A	C	C	A	C	A	A	A	A	A	C	C	C	A	A	A	A	A	C	A	A	A
chr1H|HvGBSv2-337_282557716+113	A/G	1	282557829	+	NA	NA	NA	NA	NA	NA	A	A	A	A	A	A	A	A	G	A	A	A	A	A	A	A	G	G	A	A	G	A	G	G	A	A	A	A	A	A	A	A	A	A	G	A	A	A	A
chr1H|HvGBSv2-6423_282931660+68	T/C	1	282931728	+	NA	NA	NA	NA	NA	NA	T	T	C	C	C	T	C	C	T	C	T	T	C	C	C	C	T	T	C	C	T	C	T	T	T	T	T	C	C	C	T	T	T	T	T	C	T	T	T
chr1H|HvGBSv2-6423_282931660+80	A/T	1	282931740	+	NA	NA	NA	NA	NA	NA	A	A	A	A	A	A	A	A	T	A	A	A	A	A	A	A	T	T	A	A	T	A	T	T	A	A	A	A	A	A	A	A	A	A	T	A	A	A	A
chr1H|HvGBSv2-6423_282931660+91	T/G	1	282931751	+	NA	NA	NA	NA	NA	NA	T	T	T	T	T	T	T	T	T	T	T	T	T	T	T	T	T	T	T	T	T	T	T	T	T	T	T	T	T	T	T	T	T	T	T	T	T	G	T
chr1H|HvGBSv2-6423_282931660+122	T/C	1	282931782	+	NA	NA	NA	NA	NA	NA	C	T	T	T	T	T	T	T	C	T	T	T	T	T	T	T	C	C	T	T	C	T	C	C	T	T	T	T	T	T	T	T	T	T	C	T	T	C	T
chr1H|HvGBSv2-6423_282931660+124	A/G	1	282931784	+	NA	NA	NA	NA	NA	NA	A	A	G	G	G	A	G	G	A	G	A	A	G	G	G	G	A	A	G	G	A	G	A	A	A	A	A	G	G	G	A	A	A	A	A	G	A	A	A
chr1H|HvGBSv2-6423_282931660+158	T/C	1	282931818	+	NA	NA	NA	NA	NA	NA	C	T	T	T	T	T	T	T	C	T	T	T	T	T	T	T	C	C	T	T	C	T	C	C	T	T	T	T	T	T	T	T	T	T	C	T	T	C	T
chr1H|HvGBSv2-338_283489132+49	T/C	1	283489181	+	NA	NA	NA	NA	NA	NA	T	T	C	C	C	T	C	C	T	C	T	T	C	C	C	C	T	T	C	C	T	C	T	T	T	T	T	C	C	C	T	T	T	T	T	C	T	T	T
chr1H|HvGBSv2-338_283489132+74	A/G	1	283489206	+	NA	NA	NA	NA	NA	NA	A	A	A	A	A	A	A	A	G	A	A	A	A	A	A	A	G	G	A	A	G	A	G	G	A	A	A	A	A	A	A	A	A	A	G	A	A	A	A
chr1H|HvGBSv2-6424_284038933+63	A/C	1	284038996	+	NA	NA	NA	NA	NA	NA	A	C	A	A	A	C	A	A	A	A	C	C	A	A	A	A	A	A	A	A	A	A	A	A	C	C	C	A	A	A	C	C	C	C	A	A	C	A	C
chr1H|HvGBSv2-6424_284038933+103	C/G	1	284039036	+	NA	NA	NA	NA	NA	NA	C	C	C	C	C	C	C	C	G	C	C	C	C	C	C	C	G	G	C	C	G	C	G	G	C	C	C	C	C	C	C	C	C	C	G	C	C	C	C
chr1H|HvGBSv2-6424_284038933+148	G/T	1	284039081	+	NA	NA	NA	NA	NA	NA	T	G	G	G	G	G	G	G	T	G	G	G	G	G	G	G	T	T	G	G	T	G	T	T	G	G	G	G	G	G	G	G	G	G	T	G	G	T	G
chr1H|HvGBSv2-339_284586389+132	G/C	1	284586521	+	NA	NA	NA	NA	NA	NA	G	G	G	G	G	G	G	G	C	G	G	G	G	G	G	G	C	G	G	G	G	G	G	C	G	G	G	G	G	G	G	G	G	G	G	G	G	G	G
chr1H|HvGBSv2-6425_284997941+83	T/G	1	284998024	+	NA	NA	NA	NA	NA	NA	G	T	T	T	T	T	T	T	G	T	T	T	T	T	T	T	G	G	T	T	G	T	G	G	T	T	T	T	T	T	T	T	T	T	G	T	T	T	T
chr1H|HvGBSv2-340_285452277+67	A/C	1	285452344	+	NA	NA	NA	NA	NA	NA	C	A	A	A	A	A	A	A	C	A	A	A	A	A	A	A	C	C	A	A	C	A	C	C	A	A	A	A	A	A	A	A	A	A	C	A	A	C	A
chr1H|HvGBSv2-340_285452277+80	T/G	1	285452357	+	NA	NA	NA	NA	NA	NA	G	T	T	T	T	T	T	T	G	T	T	T	T	T	T	T	G	G	T	T	G	T	G	G	T	T	T	T	T	T	T	T	T	T	G	T	T	G	T
chr1H|HvGBSv2-340_285452277+83	T/G	1	285452360	+	NA	NA	NA	NA	NA	NA	T	T	G	G	G	T	G	G	T	G	T	T	G	G	G	G	T	T	G	G	T	G	T	T	T	T	T	G	G	G	T	T	T	T	T	G	T	T	T
chr1H|HvGBSv2-340_285452277+85	T/C	1	285452362	+	NA	NA	NA	NA	NA	NA	T	T	T	T	T	T	T	T	C	T	T	T	T	T	T	T	C	C	T	T	C	T	C	C	T	T	T	T	T	T	T	T	T	T	C	T	T	T	T
chr1H|HvGBSv2-340_285452277+92	A/G	1	285452369	+	NA	NA	NA	NA	NA	NA	G	A	A	A	A	A	A	A	G	A	A	A	A	A	A	A	G	G	A	A	G	A	G	G	A	A	A	A	A	A	A	A	A	A	G	A	A	G	A
chr1H|HvGBSv2-6426_286042546+12	T/G	1	286042558	+	NA	NA	NA	NA	NA	NA	T	T	T	T	T	T	T	T	G	T	T	T	T	T	T	T	G	G	T	T	G	T	G	G	T	T	T	T	T	T	T	T	T	T	G	T	T	T	T
chr1H|HvGBSv2-6426_286042546+70	C/T	1	286042616	+	NA	NA	NA	NA	NA	NA	C	C	T	T	T	C	T	T	C	T	C	C	T	T	T	T	C	C	T	T	C	T	C	C	C	C	C	T	T	T	C	C	C	C	C	T	C	C	C
chr1H|HvGBSv2-6426_286042546+143	A/C	1	286042689	+	NA	NA	NA	NA	NA	NA	A	A	C	C	C	A	C	C	A	C	A	A	C	C	C	C	A	A	C	C	A	C	A	A	A	A	A	C	C	C	A	A	A	A	A	C	A	A	A
chr1H|HvGBSv2-6427_287023499+53	T/C	1	287023552	+	NA	NA	NA	NA	NA	NA	T	T	C	C	C	T	C	C	T	C	T	T	C	C	C	C	T	T	C	C	T	C	T	T	T	T	T	C	C	C	T	T	T	T	T	C	T	T	T
chr1H|HvGBSv2-342_287481243+89	A/G	1	287481332	+	NA	NA	NA	NA	NA	NA	G	A	A	A	A	A	A	A	G	A	A	A	A	A	A	A	G	G	A	A	G	A	G	G	A	A	A	A	A	A	A	A	A	A	G	A	A	A	A
chr1H|HvGBSv2-6429_288996941+32	T/G	1	288996973	+	NA	NA	NA	NA	NA	NA	T	T	T	T	T	T	T	T	G	T	T	T	T	T	T	T	G	T	T	T	T	T	T	G	T	T	T	T	T	T	T	T	T	T	T	T	T	T	T
chr1H|HvGBSv2-345_290508857+47	T/C	1	290508904	+	NA	NA	NA	NA	NA	NA	T	C	T	T	T	C	T	T	T	T	C	C	T	T	T	T	T	T	T	T	T	T	T	T	C	C	C	T	T	T	C	C	C	C	T	T	C	T	C
chr1H|HvGBSv2-12128_290826782+46	T/G	1	290826828	+	NA	NA	NA	NA	NA	NA	T	T	G	G	G	T	G	G	T	G	T	T	G	G	G	G	T	T	G	G	T	G	T	T	T	T	T	G	G	G	T	T	T	T	T	G	T	G	T
chr1H|HvGBSv2-12128_290826782+159	C/T	1	290826941	+	NA	NA	NA	NA	NA	NA	C	C	T	T	T	C	T	T	C	T	C	C	T	T	T	T	C	C	T	T	C	T	C	C	C	C	C	T	T	T	C	C	C	C	C	T	C	C	C
chr1H|HvGBSv2-6431_291043761+164	G/A	1	291043925	+	NA	NA	NA	NA	NA	NA	G	G	G	G	G	G	G	G	A	G	G	G	G	G	G	G	A	A	G	G	A	G	A	A	G	G	G	G	G	G	G	G	G	G	A	G	G	G	G
chr1H|HvGBSv2-6433_293001388+52	T/C	1	293001440	+	NA	NA	NA	NA	NA	NA	T	T	C	C	C	T	C	C	T	C	T	T	C	C	C	C	T	T	C	C	T	C	T	T	T	T	T	C	C	C	T	T	T	T	T	C	T	C	T
chr1H|HvGBSv2-6433_293001388+156	A/G	1	293001544	+	NA	NA	NA	NA	NA	NA	A	A	A	A	A	A	A	A	G	A	A	A	A	A	A	A	G	G	A	A	G	A	G	G	A	A	A	A	A	A	A	A	A	A	G	A	A	A	A
chr1H|HvGBSv2-9929_293047897+22	C/A	1	293047919	+	NA	NA	NA	NA	NA	NA	A	C	C	C	C	C	C	C	A	C	C	C	C	C	C	C	A	A	C	C	A	C	A	A	C	C	C	C	C	C	C	C	C	C	A	C	C	C	C
chr1H|HvGBSv2-6434_293944816+40	A/C	1	293944856	+	NA	NA	NA	NA	NA	NA	C	A	A	A	A	A	A	A	C	A	A	A	A	A	A	A	C	C	A	A	C	A	C	C	A	A	A	A	A	A	A	A	A	A	C	A	A	C	A
chr1H|HvGBSv2-6434_293944816+55	T/C	1	293944871	+	NA	NA	NA	NA	NA	NA	T	T	C	C	C	T	C	C	T	C	T	T	C	C	C	C	T	T	C	C	T	C	T	T	T	T	T	C	C	C	T	T	T	T	T	C	T	T	T
chr1H|HvGBSv2-348_294439772+144	A/G	1	294439916	+	NA	NA	NA	NA	NA	NA	A	A	G	G	G	A	G	G	A	G	A	A	G	G	G	G	A	A	G	G	A	G	A	A	A	A	A	G	G	G	A	A	A	A	A	G	A	G	A
chr1H|HvGBSv2-348_294439772+147	T/G	1	294439919	+	NA	NA	NA	NA	NA	NA	G	T	T	T	T	T	T	T	G	T	T	T	T	T	T	T	G	G	T	T	G	T	G	G	T	T	T	T	T	T	T	G	G	T	G	T	T	T	T
chr1H|HvGBSv2-6435_295000194+4	A/G	1	295000198	+	NA	NA	NA	NA	NA	NA	A	A	A	A	A	G	A	A	G	A	A	G	A	A	A	A	G	A	G	A	G	A	A	G	G	A	G	A	G	A	A	A	A	G	G	A	G	A	A
chr1H|HvGBSv2-6435_295000194+14	A/C	1	295000208	+	NA	NA	NA	NA	NA	NA	A	A	A	A	A	C	A	A	C	A	A	C	A	A	A	A	C	A	C	A	C	A	A	C	C	A	C	A	C	A	A	A	A	C	C	A	C	A	A
chr1H|HvGBSv2-6435_295000194+16	A/G	1	295000210	+	NA	NA	NA	NA	NA	NA	A	A	A	A	A	G	A	A	G	A	A	G	A	A	A	A	G	A	G	A	G	A	A	G	G	A	G	A	G	A	A	A	A	G	G	A	G	A	A
chr1H|HvGBSv2-6435_295000194+19	A/G	1	295000213	+	NA	NA	NA	NA	NA	NA	A	A	A	A	A	G	A	A	G	A	A	G	A	A	A	A	G	A	G	A	G	A	A	G	G	A	G	A	G	A	A	A	A	G	G	A	G	A	A
chr1H|HvGBSv2-6435_295000194+132	G/C	1	295000326	+	NA	NA	NA	NA	NA	NA	G	G	G	G	G	G	G	G	G	G	G	G	G	G	G	G	G	C	G	G	G	G	G	G	G	G	G	G	G	G	G	G	G	G	G	G	G	G	G
chr1H|HvGBSv2-6435_295000194+141	G/C	1	295000335	+	NA	NA	NA	NA	NA	NA	G	G	G	G	G	C	G	G	C	G	G	C	G	G	G	G	C	G	C	G	C	G	G	C	C	G	C	G	C	G	G	G	G	C	C	G	C	G	G
chr1H|HvGBSv2-6435_295000194+156	A/G	1	295000350	+	NA	NA	NA	NA	NA	NA	A	A	A	A	A	A	A	A	G	A	A	A	A	A	A	A	G	G	A	A	G	A	G	G	A	A	A	A	A	A	A	A	A	A	G	A	A	A	A
chr1H|HvGBSv2-1670_295529237+18	T/C	1	295529255	+	NA	NA	NA	NA	NA	NA	T	C	T	T	T	C	T	T	T	T	C	C	T	T	T	T	T	T	T	T	T	T	T	T	C	C	C	T	T	T	C	C	C	C	T	T	C	T	C
chr1H|HvGBSv2-1670_295529237+39	G/A	1	295529276	+	NA	NA	NA	NA	NA	NA	G	G	G	G	G	G	G	G	G	G	G	G	G	G	G	G	G	G	G	G	G	G	G	G	G	G	G	G	G	G	G	G	G	G	G	G	G	A	G
chr1H|HvGBSv2-1670_295529237+152	G/C	1	295529389	+	NA	NA	NA	NA	NA	NA	C	G	G	G	G	G	G	G	C	G	G	G	G	G	G	G	C	C	G	G	C	G	C	C	G	G	G	G	G	G	G	G	G	G	C	G	G	G	G
chr1H|HvGBSv2-349_295530164+16	T/C	1	295530180	+	NA	NA	NA	NA	NA	NA	T	T	T	T	T	T	T	T	C	T	T	T	T	T	T	T	C	C	T	T	C	T	C	C	T	T	T	T	T	T	T	T	T	T	C	T	T	T	T
chr1H|HvGBSv2-349_295530164+94	T/C	1	295530258	+	NA	NA	NA	NA	NA	NA	T	C	T	T	T	C	T	T	T	T	C	C	T	T	T	T	T	T	T	T	T	T	T	T	C	C	C	T	T	T	C	C	C	C	T	T	C	T	C
chr1H|HvGBSv2-349_295530164+110	T/C	1	295530274	+	NA	NA	NA	NA	NA	NA	T	T	C	C	C	T	C	C	T	C	T	T	C	C	C	C	T	T	C	C	T	C	T	T	T	T	T	C	C	C	T	T	T	T	T	C	T	C	T
chr1H|HvGBSv2-6437_296971288+46	T/C	1	296971334	+	NA	NA	NA	NA	NA	NA	T	T	T	T	T	T	T	T	C	T	T	T	T	T	T	T	C	C	T	T	C	T	C	C	T	T	T	T	T	T	T	T	T	T	C	T	T	T	T
chr1H|HvGBSv2-6437_296971288+50	T/A	1	296971338	+	NA	NA	NA	NA	NA	NA	T	T	T	T	T	T	T	T	A	T	T	T	T	T	T	T	A	A	T	T	A	T	A	A	T	T	T	T	T	T	T	T	T	T	A	T	T	T	T
chr1H|HvGBSv2-351_297477931+14	C/A	1	297477945	+	NA	NA	NA	NA	NA	NA	C	C	A	A	A	C	A	A	C	A	C	C	A	A	A	A	C	C	A	A	C	A	C	C	C	C	C	A	A	A	C	C	C	C	C	A	C	C	C
chr1H|HvGBSv2-351_297477931+88	T/C	1	297478019	+	NA	NA	NA	NA	NA	NA	T	T	T	T	T	T	T	T	C	T	T	T	T	T	T	T	C	C	T	T	C	T	C	C	T	T	T	T	T	T	T	T	T	T	C	T	T	T	T
chr1H|HvGBSv2-627_297697215+24	A/G	1	297697239	+	NA	NA	NA	NA	NA	NA	A	A	G	G	G	A	G	G	A	G	A	A	R	G	G	G	A	A	G	G	A	G	A	A	A	A	A	G	G	G	A	A	A	A	A	G	A	A	A
chr1H|HvGBSv2-627_297697215+125	T/C	1	297697340	+	NA	NA	NA	NA	NA	NA	T	T	C	C	C	T	C	C	T	C	T	T	Y	C	C	C	T	T	C	C	T	C	T	T	T	T	T	C	C	C	T	T	T	T	T	C	T	T	T
chr1H|HvGBSv2-6438_297990920+65	T/C	1	297990985	+	NA	NA	NA	NA	NA	NA	T	T	T	T	T	T	T	T	C	T	T	T	T	T	T	T	C	T	T	T	T	T	T	C	T	T	T	T	T	T	T	T	T	T	T	T	T	T	T
chr1H|HvGBSv2-352_298552458+38	T/C	1	298552496	+	NA	NA	NA	NA	NA	NA	T	T	C	C	C	T	C	C	T	C	T	T	C	C	C	C	T	T	C	C	T	C	T	T	T	T	T	C	C	C	T	T	T	T	T	C	T	T	T
chr1H|HvGBSv2-352_298552458+104	T/C	1	298552562	+	NA	NA	NA	NA	NA	NA	T	T	T	T	T	T	T	T	C	T	T	T	T	T	T	T	C	C	T	T	C	T	C	C	T	T	T	T	T	T	T	T	T	T	C	T	T	T	T
chr1H|HvGBSv2-352_298552458+130	A/C	1	298552588	+	NA	NA	NA	NA	NA	NA	A	A	C	C	C	A	C	C	A	C	A	A	C	C	C	C	A	A	C	C	A	C	A	A	A	A	A	C	C	C	A	A	A	A	A	C	A	A	A
chr1H|HvGBSv2-6439_299042358+19	T/C	1	299042377	+	NA	NA	NA	NA	NA	NA	T	T	T	T	T	T	T	T	C	T	T	T	T	T	T	T	C	C	T	T	C	T	C	C	T	T	T	T	T	T	T	T	T	T	C	T	T	T	T
chr1H|HvGBSv2-353_299480665+14	T/C	1	299480679	+	NA	NA	NA	NA	NA	NA	T	T	T	T	T	T	T	T	C	T	T	T	T	T	T	T	C	C	T	T	C	T	C	C	T	T	T	T	T	T	T	T	T	T	C	T	T	T	T
chr1H|HvGBSv2-353_299480665+33	C/T	1	299480698	+	NA	NA	NA	NA	NA	NA	C	T	C	C	C	T	C	C	C	C	T	T	C	C	C	C	C	C	C	C	C	C	C	C	T	T	T	C	C	C	T	T	T	T	C	C	T	C	T
chr1H|HvGBSv2-6440_299970526+27	T/C	1	299970553	+	NA	NA	NA	NA	NA	NA	C	T	T	T	T	T	T	T	C	T	T	T	T	T	T	T	C	C	T	T	C	T	C	C	T	T	T	T	T	T	T	T	T	T	C	T	T	C	T
chr1H|HvGBSv2-6440_299970526+150	T/A	1	299970676	+	NA	NA	NA	NA	NA	NA	T	A	T	T	T	A	T	T	T	T	A	A	T	T	T	T	T	T	T	T	T	T	T	T	A	A	A	T	T	T	A	A	A	A	T	T	A	T	A
chr1H|HvGBSv2-354_300516483+61	T/C	1	300516544	+	NA	NA	NA	NA	NA	NA	T	T	T	T	T	T	T	T	C	T	T	T	T	T	T	T	C	T	T	T	T	T	T	C	T	T	T	T	T	T	T	T	T	T	T	T	T	T	T
chr1H|HvGBSv2-354_300516483+173	T/C	1	300516656	+	NA	NA	NA	NA	NA	NA	C	T	T	T	T	T	T	T	C	T	T	T	T	T	T	T	C	C	T	T	C	T	C	C	T	T	T	T	T	T	T	T	T	T	C	T	T	C	T
chr1H|HvGBSv2-6441_301006448+55	T/C	1	301006503	+	NA	NA	NA	NA	NA	NA	T	C	T	T	T	C	T	T	T	T	C	C	T	T	T	T	T	T	T	T	T	T	T	T	C	C	C	T	T	T	C	C	C	C	T	T	C	T	C
chr1H|HvGBSv2-6441_301006448+62	A/G	1	301006510	+	NA	NA	NA	NA	NA	NA	A	A	G	G	G	A	G	G	A	G	A	A	G	G	G	G	A	A	G	G	A	G	A	A	A	A	A	G	G	G	A	A	A	A	A	G	A	A	A
chr1H|HvGBSv2-6441_301006448+121	A/G	1	301006569	+	NA	NA	NA	NA	NA	NA	A	G	A	A	A	G	A	A	A	A	G	G	A	A	A	A	A	A	A	A	A	A	A	A	G	G	G	A	A	A	G	G	G	G	A	A	G	A	G
chr1H|HvGBSv2-355_301508997+104	T/G	1	301509101	+	NA	NA	NA	NA	NA	NA	T	G	T	T	T	G	T	T	T	T	G	G	T	T	T	T	T	T	T	T	T	T	T	T	G	G	G	T	T	T	G	G	G	G	T	T	G	T	G
chr1H|HvGBSv2-355_301508997+115	T/A	1	301509112	+	NA	NA	NA	NA	NA	NA	A	T	T	T	T	T	T	T	A	T	T	T	T	T	T	T	A	A	T	T	A	T	A	A	T	T	T	T	T	T	T	T	T	T	A	T	T	A	T
chr1H|HvGBSv2-6442_301978061+108	A/G	1	301978169	+	NA	NA	NA	NA	NA	NA	A	A	A	A	A	A	A	A	G	A	A	A	A	A	A	A	G	G	A	A	G	A	G	G	A	A	A	A	A	A	A	A	A	A	G	A	A	A	A
chr1H|HvGBSv2-6442_301978061+115	T/C	1	301978176	+	NA	NA	NA	NA	NA	NA	C	T	T	T	T	T	T	T	C	T	T	T	T	T	T	T	C	C	T	T	C	T	C	C	T	T	T	T	T	T	T	T	T	T	C	T	T	C	T
chr1H|HvGBSv2-356_302533973+18	T/C	1	302533991	+	NA	NA	NA	NA	NA	NA	T	T	T	T	T	T	T	T	C	T	T	T	T	T	T	T	C	C	T	T	C	T	C	C	T	T	T	T	T	T	T	T	T	T	C	T	T	T	T
chr1H|HvGBSv2-357_303507129+166	T/C	1	303507295	+	NA	NA	NA	NA	NA	NA	T	T	T	T	T	T	T	T	C	T	T	T	T	T	T	T	C	T	T	T	T	T	T	C	T	T	T	T	T	T	T	T	T	T	T	T	T	T	T
chr1H|HvGBSv2-358_304657983+8	A/T	1	304657991	+	NA	NA	NA	NA	NA	NA	A	T	A	A	A	T	A	A	A	A	T	T	A	A	A	A	A	A	A	A	A	A	A	A	T	T	T	A	A	A	T	T	T	T	A	A	T	A	T
chr1H|HvGBSv2-358_304657983+38	C/A	1	304658021	+	NA	NA	NA	NA	NA	NA	C	A	C	C	C	A	C	C	C	C	A	A	C	C	C	C	C	C	C	C	C	C	C	C	A	A	A	C	C	C	A	A	A	A	C	C	A	C	A
chr1H|HvGBSv2-358_304657983+50	A/T	1	304658033	+	NA	NA	NA	NA	NA	NA	A	T	A	A	A	T	A	A	A	A	T	T	A	A	A	A	A	A	A	A	A	A	A	A	T	T	T	A	A	A	T	T	T	T	A	A	T	A	T
chr1H|HvGBSv2-358_304657983+90	T/G	1	304658073	+	NA	NA	NA	NA	NA	NA	T	G	T	T	T	G	T	T	T	T	G	G	T	T	T	T	T	T	T	T	T	T	T	T	G	G	G	T	T	T	G	G	G	G	T	T	G	T	G
chr1H|HvGBSv2-6445_304999570+10	A/G	1	304999580	+	NA	NA	NA	NA	NA	NA	G	A	A	A	A	A	A	A	G	A	A	A	A	A	A	A	G	G	A	A	G	A	G	G	A	A	A	A	A	A	A	A	A	A	G	A	A	G	A
chr1H|HvGBSv2-6445_304999570+93	T/C	1	304999663	+	NA	NA	NA	NA	NA	NA	T	T	C	C	C	T	C	C	T	C	T	T	C	C	C	C	T	T	C	C	T	C	T	T	T	T	T	C	C	C	T	T	T	T	T	C	T	T	T
chr1H|HvGBSv2-6445_304999570+94	T/A	1	304999664	+	NA	NA	NA	NA	NA	NA	T	T	A	A	A	T	A	A	T	A	T	T	A	A	A	A	T	T	A	A	T	A	T	T	T	T	T	A	A	A	T	T	T	T	T	A	T	T	T
chr1H|HvGBSv2-6445_304999570+156	C/A	1	304999726	+	NA	NA	NA	NA	NA	NA	C	A	C	C	C	A	C	C	C	C	A	A	C	C	C	C	C	C	C	C	C	C	C	C	A	A	A	C	C	C	A	A	A	A	C	C	A	C	A
chr1H|HvGBSv2-6446_306001531+43	T/C	1	306001574	+	NA	NA	NA	NA	NA	NA	T	T	T	T	T	T	T	T	C	T	T	T	T	T	T	T	C	C	T	T	C	T	C	C	T	T	T	T	T	T	T	T	T	T	C	T	T	T	T
chr1H|HvGBSv2-6446_306001531+62	T/C	1	306001593	+	NA	NA	NA	NA	NA	NA	T	T	T	T	C	T	C	T	T	C	T	T	C	C	C	T	T	T	C	C	T	T	T	T	T	T	T	T	T	C	T	T	T	T	T	C	T	T	T
chr1H|HvGBSv2-6446_306001531+115	T/C	1	306001646	+	NA	NA	NA	NA	NA	NA	T	T	T	T	C	T	C	T	T	C	T	T	C	C	C	T	T	T	C	C	T	T	T	T	T	T	T	T	T	C	T	T	T	T	T	C	T	T	T
chr1H|HvGBSv2-360_306500741+149	G/C	1	306500890	+	NA	NA	NA	NA	NA	NA	G	C	C	C	G	C	G	C	G	G	G	C	G	G	G	G	G	G	G	G	G	C	G	G	C	C	C	G	G	G	G	G	C	C	G	G	C	G	C
chr1H|HvGBSv2-6447_306995167+29	A/G	1	306995196	+	NA	NA	NA	NA	NA	NA	A	A	G	G	A	G	A	G	A	A	A	G	A	A	A	A	A	A	A	A	A	G	A	A	G	G	G	A	A	A	A	A	G	G	A	A	G	A	G
chr1H|HvGBSv2-6447_306995167+74	C/T	1	306995241	+	NA	NA	NA	NA	NA	NA	C	C	T	T	T	T	T	T	C	T	T	T	T	T	T	C	C	C	T	T	C	T	C	C	T	T	T	C	C	T	T	C	T	T	C	T	T	C	T
chr1H|HvGBSv2-361_307508911+80	C/T	1	307508991	+	NA	NA	NA	NA	NA	NA	C	C	T	T	C	T	C	T	C	C	C	T	C	C	C	C	C	C	C	C	C	T	C	C	T	T	T	C	C	C	C	C	T	T	C	C	T	C	T
chr1H|HvGBSv2-6448_308003414+5	A/G	1	308003419	+	NA	NA	NA	NA	NA	NA	A	A	A	A	A	A	A	A	G	A	A	A	A	A	A	A	G	G	A	A	G	A	G	G	A	A	A	A	A	A	A	A	A	A	G	A	A	A	A
chr1H|HvGBSv2-6448_308003414+86	C/T	1	308003500	+	NA	NA	NA	NA	NA	NA	C	C	C	C	C	C	C	C	C	C	C	C	C	C	C	C	C	C	C	C	C	C	C	C	C	C	C	C	C	C	C	C	C	C	C	C	C	C	C
chr1H|HvGBSv2-6448_308003414+117	T/C	1	308003531	+	NA	NA	NA	NA	NA	NA	T	T	T	T	C	T	C	T	T	C	T	T	C	C	C	T	T	T	C	C	T	T	T	T	T	T	T	T	T	C	T	T	T	T	T	C	T	T	T
chr1H|HvGBSv2-6448_308003414+143	C/T	1	308003557	+	NA	NA	NA	NA	NA	NA	C	C	C	C	T	C	T	C	C	T	C	C	T	T	T	C	C	C	T	T	C	C	C	C	C	C	C	C	C	T	C	C	C	C	C	T	C	C	C
chr1H|HvGBSv2-362_308501410+75	A/C	1	308501485	+	NA	NA	NA	NA	NA	NA	A	A	C	C	A	C	A	C	A	A	A	C	A	A	A	A	A	A	A	A	A	C	A	A	C	C	C	A	A	A	A	A	C	C	A	A	C	A	C
chr1H|HvGBSv2-6449_308998201+129	T/G	1	308998330	+	NA	NA	NA	NA	NA	NA	T	T	G	G	T	G	T	G	T	T	T	G	T	T	T	T	T	T	T	T	T	G	T	T	G	G	G	T	T	T	T	T	G	G	T	T	G	T	G
chr1H|HvGBSv2-363_309477637+126	C/T	1	309477763	+	NA	NA	NA	NA	NA	NA	C	C	T	T	C	T	C	T	C	C	C	T	C	C	C	C	C	C	C	C	C	T	C	C	T	T	T	C	C	C	C	C	T	T	C	C	T	C	T
chr1H|HvGBSv2-6450_310010799+121	G/C	1	310010920	+	NA	NA	NA	NA	NA	NA	G	G	G	G	G	C	G	G	G	G	G	C	G	G	G	G	G	G	G	G	G	G	G	G	C	C	C	G	G	G	G	G	G	C	G	G	G	G	C
chr1H|HvGBSv2-6450_310010799+139	C/T	1	310010938	+	NA	NA	NA	NA	NA	NA	C	C	T	T	T	T	T	T	C	T	T	T	T	T	T	C	C	C	T	T	C	T	C	C	T	T	T	C	C	T	T	C	T	T	C	T	T	C	T
chr1H|HvGBSv2-364_310496864+117	C/A	1	310496981	+	NA	NA	NA	NA	NA	NA	C	C	A	A	A	A	A	A	C	A	A	A	A	A	A	C	C	C	A	A	C	A	C	C	A	A	A	C	C	A	A	C	A	A	C	A	A	C	A
chr1H|HvGBSv2-6451_311001507+2	A/G	1	311001509	+	NA	NA	NA	NA	NA	NA	A	A	G	G	A	A	A	G	A	A	A	A	A	A	A	A	A	A	A	A	A	G	A	A	A	A	A	A	A	A	A	A	A	A	A	A	A	A	A
chr1H|HvGBSv2-6451_311001507+91	G/A	1	311001598	+	NA	NA	NA	NA	NA	NA	G	G	A	A	A	A	A	A	G	A	A	A	A	A	A	G	G	G	A	A	G	A	G	G	A	A	A	G	G	A	A	G	A	A	G	A	A	G	A
chr1H|HvGBSv2-6451_311001507+123	C/T	1	311001630	+	NA	NA	NA	NA	NA	NA	C	C	T	T	T	T	T	T	C	T	T	T	T	T	T	C	C	C	T	T	C	T	C	C	T	T	T	C	C	T	T	C	T	T	C	T	T	C	T
chr1H|HvGBSv2-365_311494348+126	G/C	1	311494474	+	NA	NA	NA	NA	NA	NA	G	G	C	C	C	C	C	C	G	C	C	C	C	C	C	G	G	G	C	C	G	C	G	G	C	C	C	G	G	C	C	G	C	C	G	C	C	G	C
chr1H|HvGBSv2-365_311494348+134	A/G	1	311494482	+	NA	NA	NA	NA	NA	NA	A	A	G	G	G	G	G	G	A	G	G	G	G	G	G	A	A	A	G	G	A	G	A	A	G	G	G	A	A	G	G	A	G	G	A	G	G	A	G
chr1H|HvGBSv2-365_311494348+143	G/T	1	311494491	+	NA	NA	NA	NA	NA	NA	G	G	K	G	G	G	G	K	G	G	G	G	G	G	G	G	G	G	G	G	K	G	G	G	K	G	G	G	G	G	G	G	G	G	G	G	G	K	G
chr1H|HvGBSv2-6452_311997433+68	C/T	1	311997501	+	NA	NA	NA	NA	NA	NA	C	C	T	T	C	T	C	T	C	C	T	T	C	C	C	C	C	C	C	C	C	T	C	C	T	T	T	C	C	C	T	C	T	T	C	C	T	C	T
chr1H|HvGBSv2-6452_311997433+80	G/A	1	311997513	+	NA	NA	NA	NA	NA	NA	G	G	A	A	A	A	A	A	G	A	A	A	A	A	A	G	G	G	A	A	G	A	G	G	A	A	A	G	G	A	A	G	A	A	G	A	A	G	A
chr1H|HvGBSv2-366_312522480+16	C/T	1	312522496	+	NA	NA	NA	NA	NA	NA	C	C	T	T	T	T	T	T	C	T	T	T	T	T	T	C	C	C	T	T	C	T	C	C	T	T	T	C	C	T	T	C	T	T	C	T	T	C	T
chr1H|HvGBSv2-366_312522480+143	C/T	1	312522623	+	NA	NA	NA	NA	NA	NA	C	C	C	C	C	C	C	C	C	C	C	C	C	C	C	C	C	C	C	C	C	C	C	C	C	C	C	C	C	C	C	C	C	C	C	C	C	C	C
chr1H|HvGBSv2-367_313497410+9	A/G	1	313497419	+	NA	NA	NA	NA	NA	NA	A	A	G	G	G	G	G	G	A	G	G	G	G	G	G	A	A	A	G	G	A	G	A	A	G	G	G	A	A	G	G	A	G	G	A	G	G	A	G
chr1H|HvGBSv2-367_313497410+60	C/T	1	313497470	+	NA	NA	NA	NA	NA	NA	C	C	T	T	T	T	T	T	C	T	T	T	T	T	T	C	C	C	T	T	C	T	C	C	T	T	T	C	C	T	T	C	T	T	C	T	T	C	T
chr1H|HvGBSv2-367_313497410+113	G/A	1	313497523	+	NA	NA	NA	NA	NA	NA	G	G	A	A	A	A	A	A	G	A	A	A	A	A	A	G	G	G	A	A	G	A	G	G	A	A	A	G	G	A	A	G	A	A	G	A	A	G	A
chr1H|HvGBSv2-367_313497410+143	A/G	1	313497553	+	NA	NA	NA	NA	NA	NA	A	A	G	G	G	G	G	G	A	G	G	G	G	G	G	A	A	A	G	G	A	G	A	A	G	G	G	A	A	G	G	A	G	G	A	G	G	A	G
chr1H|HvGBSv2-367_313497410+147	A/G	1	313497557	+	NA	NA	NA	NA	NA	NA	A	A	A	A	G	A	G	A	A	G	A	A	G	G	G	A	A	A	G	G	A	A	A	A	A	A	A	A	A	G	A	A	A	A	A	G	A	A	A
chr1H|HvGBSv2-367_313497410+172	G/T	1	313497582	+	NA	NA	NA	NA	NA	NA	G	G	T	T	T	T	T	T	G	T	T	T	T	T	T	G	G	G	T	T	G	T	G	G	T	T	T	G	G	T	T	G	T	T	G	T	T	G	T
chr1H|HvGBSv2-6454_313978499+119	G/C	1	313978618	+	NA	NA	NA	NA	NA	NA	G	G	G	G	G	G	G	G	C	G	G	G	G	G	G	G	C	G	G	G	G	G	C	C	G	G	G	G	G	G	G	G	G	G	C	G	G	G	G
chr1H|HvGBSv2-6455_314992284+90	C/A	1	314992374	+	NA	NA	NA	NA	NA	NA	A	C	A	A	C	A	C	A	C	C	A	A	C	C	C	C	C	C	C	C	C	A	C	C	A	A	A	C	A	C	A	A	A	A	C	C	A	A	A
chr1H|HvGBSv2-6455_314992284+142	C/G	1	314992426	+	NA	NA	NA	NA	NA	NA	G	C	C	C	C	C	C	C	C	C	C	C	C	C	C	C	C	C	C	C	C	C	C	C	C	C	C	C	G	C	C	G	C	C	C	C	G	G	C
chr1H|HvGBSv2-369_315508224+36	T/C	1	315508260	+	NA	NA	NA	NA	NA	NA	T	T	C	C	T	C	T	C	T	T	C	C	T	T	T	T	T	T	T	T	T	C	T	T	C	C	C	T	C	T	C	C	C	C	T	T	C	C	C
chr1H|HvGBSv2-6457_317002641+47	A/G	1	317002688	+	NA	NA	NA	NA	NA	NA	A	A	G	G	A	G	R	G	A	A	G	G	A	A	A	A	A	A	A	A	A	G	A	A	G	G	G	A	G	A	G	G	G	G	A	A	G	G	G
chr1H|HvGBSv2-8370_317324351+102	C/G	1	317324453	+	NA	NA	NA	NA	NA	NA	C	C	G	G	C	G	C	G	C	C	G	G	C	C	C	C	C	C	C	C	C	G	C	C	G	G	G	C	C	C	G	C	G	G	C	C	C	C	G
chr1H|HvGBSv2-8370_317324351+127	A/G	1	317324478	+	NA	NA	NA	NA	NA	NA	A	A	G	G	A	G	A	G	A	A	G	G	A	A	A	A	A	A	A	A	A	G	A	A	G	G	G	A	A	A	G	A	G	G	A	A	A	A	G
chr1H|HvGBSv2-371_317348998+138	T/C	1	317349136	+	NA	NA	NA	NA	NA	NA	T	T	C	C	T	C	T	C	T	T	C	C	T	T	T	T	T	T	T	T	T	C	T	T	C	C	C	T	T	T	C	T	C	C	T	T	T	T	C
chr1H|HvGBSv2-372_318494698+89	A/G	1	318494787	+	NA	NA	NA	NA	NA	NA	A	A	G	G	A	G	A	G	A	A	G	G	A	A	A	A	A	A	A	A	A	G	A	A	G	G	G	A	A	A	G	A	G	G	A	A	A	A	G
chr1H|HvGBSv2-372_318494698+117	A/G	1	318494815	+	NA	NA	NA	NA	NA	NA	A	A	G	G	A	G	A	G	A	A	G	G	A	A	A	A	A	A	A	A	A	G	A	A	G	G	G	A	A	A	G	A	G	G	A	A	A	A	G
chr1H|HvGBSv2-372_318494698+129	A/G	1	318494827	+	NA	NA	NA	NA	NA	NA	A	A	G	G	A	G	A	G	A	A	G	G	A	A	A	A	A	A	A	A	A	G	A	A	G	G	G	A	A	A	G	A	G	G	A	A	A	A	G
chr1H|HvGBSv2-77_318748367+75	A/C	1	318748442	+	NA	NA	NA	NA	NA	NA	A	A	C	C	A	C	A	C	A	A	C	C	A	A	A	A	A	A	A	A	A	C	A	A	C	C	C	A	C	A	C	C	C	C	A	A	C	C	C
chr1H|HvGBSv2-77_318748367+139	A/G	1	318748506	+	NA	NA	NA	NA	NA	NA	A	A	G	G	A	G	A	A	A	A	G	G	A	A	A	A	A	A	A	A	A	G	A	A	G	G	G	A	A	A	G	A	G	G	A	A	A	A	G
chr1H|HvGBSv2-6459_319002640+44	A/G	1	319002684	+	NA	NA	NA	NA	NA	NA	A	A	A	A	A	A	A	G	A	A	A	A	A	A	A	A	A	A	A	A	A	A	A	A	A	A	A	A	G	R	A	G	A	A	A	A	G	G	A
chr1H|HvGBSv2-6459_319002640+70	C/T	1	319002710	+	NA	NA	NA	NA	NA	NA	C	C	T	T	C	T	C	T	C	C	T	T	C	C	C	C	C	C	C	C	C	T	C	C	T	T	T	C	T	Y	T	T	T	T	C	C	T	T	T
chr1H|HvGBSv2-6459_319002640+95	G/C	1	319002735	+	NA	NA	NA	NA	NA	NA	G	G	G	G	G	G	G	C	G	G	G	G	G	G	G	G	G	G	G	G	G	G	G	G	G	G	G	G	C	S	G	C	G	G	G	G	C	C	G
chr1H|HvGBSv2-6460_319995545+143	C/T	1	319995688	+	NA	NA	NA	NA	NA	NA	C	C	T	T	C	T	C	C	C	C	T	T	C	C	C	C	C	C	C	C	C	T	C	C	T	T	T	C	C	C	T	C	T	T	C	C	C	C	T
chr1H|HvGBSv2-374_320500237+60	T/C	1	320500297	+	NA	NA	NA	NA	NA	NA	T	T	C	C	T	C	T	T	T	T	C	C	T	T	T	T	T	T	T	T	T	C	T	T	C	C	C	T	T	T	C	C	C	C	T	T	T	T	C
chr1H|HvGBSv2-9530_320799256+95	C/A	1	320799351	+	NA	NA	NA	NA	NA	NA	C	C	C	C	C	A	C	C	C	C	A	A	C	C	C	C	C	C	C	C	C	C	C	C	A	A	A	C	C	C	A	A	A	A	C	C	C	C	A
chr1H|HvGBSv2-9530_320799256+148	A/C	1	320799404	+	NA	NA	NA	NA	NA	NA	A	A	A	A	A	C	A	A	A	A	C	C	A	A	A	A	A	A	A	A	A	A	A	A	C	C	C	A	A	A	C	C	C	C	A	A	A	A	C
chr1H|HvGBSv2-6461_321005813+30	T/C	1	321005843	+	NA	NA	NA	NA	NA	NA	T	T	T	T	T	C	T	T	T	T	C	C	T	T	T	T	T	T	T	T	T	T	T	T	C	C	C	T	T	T	C	C	C	C	T	T	T	T	C
chr1H|HvGBSv2-6461_321005813+153	T/G	1	321005966	+	NA	NA	NA	NA	NA	NA	T	T	T	T	T	G	T	T	T	T	G	G	T	T	T	T	T	T	T	T	T	T	T	T	G	G	G	T	T	T	G	G	G	G	T	T	T	T	G
chr1H|HvGBSv2-375_321396494+132	G/A	1	321396626	+	NA	NA	NA	NA	NA	NA	G	G	G	G	G	A	G	G	G	G	A	A	G	G	G	G	G	G	G	G	G	G	G	G	A	A	A	G	G	G	A	A	A	A	G	G	G	G	A
chr1H|HvGBSv2-376_322524548+9	A/G	1	322524557	+	NA	NA	NA	NA	NA	NA	A	A	A	A	A	A	A	A	A	A	A	A	A	A	A	A	A	A	A	A	A	A	A	A	A	A	A	A	A	A	A	A	A	A	A	A	A	A	A
chr1H|HvGBSv2-376_322524548+173	T/C	1	322524721	+	NA	NA	NA	NA	NA	NA	T	T	T	T	T	C	T	C	T	T	C	C	T	T	T	C	T	T	T	T	T	T	T	T	C	C	C	T	C	T	T	C	C	C	T	T	C	C	C
chr1H|HvGBSv2-377_323499315+9	T/G	1	323499324	+	NA	NA	NA	NA	NA	NA	T	T	T	T	T	T	T	G	T	T	T	T	T	T	T	G	T	T	T	T	T	T	T	T	T	T	T	T	G	T	T	G	G	T	T	T	T	T	T
chr1H|HvGBSv2-377_323499315+49	A/G	1	323499364	+	NA	NA	NA	NA	NA	NA	A	A	A	A	A	G	A	A	A	A	G	G	A	A	A	A	A	A	A	A	A	A	A	A	G	G	G	A	A	A	G	A	A	G	A	A	A	A	G
chr1H|HvGBSv2-5133_324034253+3	T/G	1	324034256	+	NA	NA	NA	NA	NA	NA	T	T	T	T	T	G	T	T	T	T	G	G	T	T	T	T	T	T	T	T	T	T	T	T	G	G	G	T	T	T	G	G	G	G	T	T	T	T	G
chr1H|HvGBSv2-5133_324034253+8	T/C	1	324034261	+	NA	NA	NA	NA	NA	NA	T	T	T	T	T	C	T	T	T	T	C	C	T	T	T	T	T	T	T	T	T	T	T	T	C	C	C	T	T	T	C	C	C	C	T	T	T	T	C
chr1H|HvGBSv2-378_324495000+66	C/T	1	324495066	+	NA	NA	NA	NA	NA	NA	C	C	C	C	C	T	C	C	C	C	T	T	C	C	C	C	C	C	C	C	C	C	C	C	T	T	T	C	C	C	T	T	T	T	C	C	C	C	T
chr1H|HvGBSv2-378_324495000+130	T/C	1	324495130	+	NA	NA	NA	NA	NA	NA	T	T	T	T	T	T	T	T	C	T	T	T	T	T	T	T	C	C	T	T	C	T	C	C	T	T	T	T	T	T	T	T	T	T	C	T	T	T	T
chr1H|HvGBSv2-6466_325994203+63	G/C	1	325994266	+	NA	NA	NA	NA	NA	NA	C	C	G	G	G	G	G	G	C	G	G	G	G	G	G	G	C	C	G	G	C	G	C	C	G	G	G	G	G	G	G	G	G	G	C	G	C	C	G
chr1H|HvGBSv2-6466_325994203+137	T/G	1	325994340	+	NA	NA	NA	NA	NA	NA	T	T	T	T	T	T	T	G	T	T	T	T	T	T	T	G	T	T	T	T	T	T	T	T	T	T	T	T	G	T	T	T	T	T	T	T	T	T	T
chr1H|HvGBSv2-381_327498001+117	T/G	1	327498118	+	NA	NA	NA	NA	NA	NA	T	T	T	T	T	G	T	T	T	T	G	G	T	T	T	T	T	T	T	T	T	T	T	T	G	G	G	T	T	T	T	G	G	G	T	T	T	T	G
chr1H|HvGBSv2-6469_329001458+47	G/A	1	329001505	+	NA	NA	NA	NA	NA	NA	A	A	G	G	G	G	G	G	A	G	G	G	G	G	G	G	A	A	G	G	A	G	A	A	G	G	G	G	G	G	G	G	G	G	A	A	G	G	G
chr1H|HvGBSv2-6469_329001458+62	G/A	1	329001520	+	NA	NA	NA	NA	NA	NA	G	G	A	A	A	G	A	G	G	A	G	G	A	A	A	G	G	G	A	A	G	A	G	G	G	G	G	A	G	G	A	G	G	G	G	G	G	G	G
chr1H|HvGBSv2-6469_329001458+137	A/C	1	329001595	+	NA	NA	NA	NA	NA	NA	A	A	A	A	A	C	A	A	A	A	C	C	A	A	A	A	A	A	A	A	A	A	A	A	C	C	C	A	A	A	A	C	C	C	A	A	A	A	C
chr1H|HvGBSv2-383_329700212+51	T/C	1	329700263	+	NA	NA	NA	NA	NA	NA	C	C	T	T	T	T	T	T	C	T	T	T	T	T	T	T	C	C	T	T	C	T	C	C	T	T	T	T	T	T	T	T	T	T	C	C	T	T	T
chr1H|HvGBSv2-383_329700212+125	T/A	1	329700337	+	NA	NA	NA	NA	NA	NA	A	A	T	T	T	T	T	T	A	T	T	T	T	T	T	T	A	A	T	T	A	T	A	A	T	T	T	T	T	T	T	T	T	T	A	A	T	T	T
chr1H|HvGBSv2-3251_329810209+60	C/G	1	329810269	+	NA	NA	NA	NA	NA	NA	C	C	G	G	G	C	G	C	C	G	C	C	G	G	G	C	C	C	G	G	C	G	C	C	C	C	C	G	C	S	G	C	C	C	C	C	C	S	C
chr1H|HvGBSv2-3251_329810209+86	A/G	1	329810295	+	NA	NA	NA	NA	NA	NA	A	A	G	G	G	A	G	A	A	G	A	A	G	G	G	A	A	A	G	G	A	G	A	A	A	A	A	G	A	R	G	A	A	A	A	A	A	R	A
chr1H|HvGBSv2-6470_329991732+34	T/C	1	329991766	+	NA	NA	NA	NA	NA	NA	T	T	C	C	C	T	C	T	T	C	T	T	C	C	C	T	T	T	C	C	T	C	T	T	T	T	T	C	T	C	C	T	T	T	T	T	C	C	T
chr1H|HvGBSv2-6470_329991732+61	T/C	1	329991793	+	NA	NA	NA	NA	NA	NA	T	T	C	C	C	T	C	T	T	C	T	T	C	C	C	T	T	T	C	C	T	C	T	T	T	T	T	C	T	C	C	T	T	T	T	T	C	C	T
chr1H|HvGBSv2-6470_329991732+133	G/C	1	329991865	+	NA	NA	NA	NA	NA	NA	C	C	G	G	G	G	G	G	C	G	G	G	G	G	G	G	C	C	G	G	C	G	C	C	G	G	G	G	G	G	G	G	G	G	C	C	G	G	G
chr1H|HvGBSv2-384_330493487+73	C/T	1	330493560	+	NA	NA	NA	NA	NA	NA	T	T	C	C	C	C	C	C	T	C	C	C	C	C	C	C	T	T	C	C	T	C	T	T	C	C	C	C	C	C	C	C	C	C	T	T	C	C	C
chr1H|HvGBSv2-6471_330991715+39	A/G	1	330991754	+	NA	NA	NA	NA	NA	NA	A	A	A	A	A	G	A	A	A	A	G	G	A	A	A	A	A	A	A	A	A	A	A	A	G	G	G	A	A	A	A	G	G	G	A	A	A	A	G
chr1H|HvGBSv2-6471_330991715+89	T/C	1	330991804	+	NA	NA	NA	NA	NA	NA	T	T	T	T	T	T	T	C	T	T	T	T	T	T	T	C	T	T	T	T	T	T	T	T	T	T	T	T	C	T	T	T	T	T	T	T	T	T	T
chr1H|HvGBSv2-6471_330991715+107	A/G	1	330991822	+	NA	NA	NA	NA	NA	NA	G	G	A	A	A	A	A	A	G	A	A	A	A	A	A	A	G	G	A	G	G	A	G	G	A	A	A	A	A	A	A	A	A	A	G	G	A	A	A
chr1H|HvGBSv2-6471_330991715+142	T/C	1	330991857	+	NA	NA	NA	NA	NA	NA	T	T	C	C	C	T	C	T	T	C	T	T	C	C	C	T	T	T	C	T	T	C	T	T	T	T	T	C	T	C	C	T	T	T	T	T	C	C	T
chr1H|HvGBSv2-6471_330991715+151	A/C	1	330991866	+	NA	NA	NA	NA	NA	NA	C	C	A	A	A	A	A	A	C	A	A	A	A	A	A	A	C	C	A	C	C	A	C	C	A	A	A	A	A	A	A	A	A	A	C	C	A	A	A
chr1H|HvGBSv2-385_331497150+4	C/G	1	331497154	+	NA	NA	NA	NA	NA	NA	C	C	C	C	C	C	C	C	C	C	C	C	C	C	C	G	C	C	C	C	C	C	C	C	C	C	C	C	G	C	C	C	C	C	C	C	C	C	C
chr1H|HvGBSv2-385_331497150+28	A/G	1	331497178	+	NA	NA	NA	NA	NA	NA	A	A	A	A	A	A	A	A	A	A	A	A	A	A	A	A	A	A	A	A	A	A	A	A	A	A	A	A	A	A	A	A	A	A	A	A	G	G	A
chr1H|HvGBSv2-385_331497150+56	A/T	1	331497206	+	NA	NA	NA	NA	NA	NA	T	T	A	A	A	A	A	A	T	A	A	A	A	A	A	A	T	T	A	A	T	A	T	T	A	A	A	A	A	A	A	A	A	A	T	T	A	A	A
chr1H|HvGBSv2-385_331497150+103	T/C	1	331497253	+	NA	NA	NA	NA	NA	NA	T	T	C	C	C	T	C	T	T	C	T	T	C	C	C	T	T	T	C	C	T	C	T	T	T	T	T	C	T	T	C	T	T	T	T	T	T	T	T
chr1H|HvGBSv2-385_331497150+127	A/G	1	331497277	+	NA	NA	NA	NA	NA	NA	A	A	G	G	G	A	G	A	A	G	A	A	G	G	G	A	A	A	G	G	A	G	A	A	A	A	A	G	A	A	G	A	A	A	A	A	A	A	A
chr1H|HvGBSv2-6472_332025225+36	A/G	1	332025261	+	NA	NA	NA	NA	NA	NA	A	A	G	G	G	A	G	A	A	G	A	A	G	G	G	A	A	A	G	G	A	G	A	A	A	A	A	G	A	G	G	A	A	A	A	A	A	A	A
chr1H|HvGBSv2-6472_332025225+82	A/G	1	332025307	+	NA	NA	NA	NA	NA	NA	G	G	A	A	A	A	A	A	G	A	A	A	A	A	A	A	G	G	A	A	G	A	G	G	A	A	A	A	A	A	A	A	A	A	G	G	A	A	A
chr1H|HvGBSv2-386_332489471+20	C/G	1	332489491	+	NA	NA	NA	NA	NA	NA	G	G	C	C	C	C	C	C	G	C	C	C	C	C	C	C	G	G	C	C	G	C	G	G	C	C	C	C	C	C	C	C	C	C	G	G	C	C	C
chr1H|HvGBSv2-386_332489471+50	T/G	1	332489521	+	NA	NA	NA	NA	NA	NA	T	T	T	T	T	G	T	T	T	T	G	G	T	T	T	T	T	T	T	T	T	T	T	T	G	G	G	T	T	T	T	G	G	G	T	T	T	T	G
chr1H|HvGBSv2-386_332489471+98	C/A	1	332489569	+	NA	NA	NA	NA	NA	NA	A	A	C	C	C	C	C	C	A	C	C	C	C	C	C	C	A	A	C	C	A	C	A	A	C	C	C	C	C	C	C	C	C	C	A	A	C	C	C
chr1H|HvGBSv2-386_332489471+165	T/C	1	332489636	+	NA	NA	NA	NA	NA	NA	T	T	T	T	T	C	T	T	T	T	C	C	T	T	T	T	T	T	T	T	T	T	T	T	C	C	C	T	T	T	T	C	C	C	T	T	T	T	C
chr1H|HvGBSv2-387_333498623+151	T/G	1	333498774	+	NA	NA	NA	NA	NA	NA	G	G	T	T	T	T	T	T	G	T	T	T	T	T	T	T	G	G	T	T	G	T	G	G	T	T	T	T	T	T	T	T	T	T	G	G	T	T	T
chr1H|HvGBSv2-6474_333990265+28	T/A	1	333990293	+	NA	NA	NA	NA	NA	NA	T	T	T	T	T	T	T	A	T	T	T	T	T	T	T	A	T	T	T	T	T	T	T	T	T	T	T	T	A	T	T	T	T	T	T	T	T	T	T
chr1H|HvGBSv2-6474_333990265+73	T/A	1	333990338	+	NA	NA	NA	NA	NA	NA	T	T	T	T	T	A	T	T	T	T	A	A	T	T	T	T	T	T	T	T	T	T	T	T	A	A	A	T	T	T	T	A	A	A	T	T	T	T	A
chr1H|HvGBSv2-1253_334067244+2	T/A	1	334067246	+	NA	NA	NA	NA	NA	NA	T	T	T	T	T	A	T	T	T	T	A	A	T	T	T	T	T	T	T	T	T	T	T	T	A	A	A	T	T	T	T	A	A	A	T	T	T	T	A
chr1H|HvGBSv2-1253_334067244+18	A/C	1	334067262	+	NA	NA	NA	NA	NA	NA	A	A	A	A	A	C	A	A	A	A	C	C	A	A	A	A	A	A	A	A	A	A	A	A	C	C	C	A	A	A	A	C	C	C	A	A	A	A	C
chr1H|HvGBSv2-1253_334067244+38	A/G	1	334067282	+	NA	NA	NA	NA	NA	NA	A	A	A	A	A	G	A	A	A	A	G	G	A	A	A	A	A	A	A	A	A	A	A	A	G	G	G	A	A	A	A	G	G	G	A	A	A	A	G
chr1H|HvGBSv2-1253_334067244+49	T/C	1	334067293	+	NA	NA	NA	NA	NA	NA	C	C	T	T	T	T	T	T	C	T	T	T	T	T	T	T	C	C	T	T	C	T	C	C	T	T	T	T	T	T	T	T	T	T	C	C	T	T	T
chr1H|HvGBSv2-1253_334067244+76	T/A	1	334067320	+	NA	NA	NA	NA	NA	NA	A	A	T	T	T	T	T	T	A	T	T	T	T	T	T	T	A	A	T	T	A	T	A	A	T	T	T	T	T	T	T	T	T	T	A	A	T	T	T
chr1H|HvGBSv2-1253_334067244+149	C/A	1	334067393	+	NA	NA	NA	NA	NA	NA	C	C	A	A	A	C	A	C	C	A	C	C	A	A	A	C	C	C	A	A	C	A	C	C	C	C	C	A	C	C	C	C	C	C	C	C	C	C	C
chr1H|HvGBSv2-388_334509296+30	T/C	1	334509326	+	NA	NA	NA	NA	NA	NA	T	T	T	T	T	T	T	C	T	T	T	T	T	T	T	C	T	T	T	T	T	T	T	T	T	T	T	T	C	T	T	T	T	T	T	T	T	T	T
chr1H|HvGBSv2-388_334509296+50	T/C	1	334509346	+	NA	NA	NA	NA	NA	NA	C	C	T	T	T	T	T	T	C	T	T	T	T	T	T	T	C	C	T	T	C	T	C	C	T	T	T	T	T	T	T	T	T	T	C	C	T	T	T
chr1H|HvGBSv2-388_334509296+63	C/T	1	334509359	+	NA	NA	NA	NA	NA	NA	T	T	C	C	C	C	C	C	T	C	C	C	C	C	C	C	T	T	C	C	T	C	T	T	C	C	C	C	C	C	C	C	C	C	T	T	C	C	C
chr1H|HvGBSv2-388_334509296+88	T/C	1	334509384	+	NA	NA	NA	NA	NA	NA	C	C	T	T	T	T	T	T	C	T	T	T	T	T	T	T	C	C	T	T	C	T	C	C	T	T	T	T	T	T	T	T	T	T	C	C	T	T	T
chr1H|HvGBSv2-388_334509296+157	A/G	1	334509453	+	NA	NA	NA	NA	NA	NA	A	A	A	A	A	A	A	G	A	A	A	A	A	A	A	G	A	A	A	A	A	A	A	A	A	A	A	A	G	A	A	A	A	A	A	A	A	A	A
chr1H|HvGBSv2-6655_334512710+23	T/C	1	334512733	+	NA	NA	NA	NA	NA	NA	T	T	C	C	C	T	C	T	T	C	T	T	C	C	C	T	T	T	C	C	T	C	T	T	T	T	T	C	T	T	C	T	T	T	T	T	T	T	T
chr1H|HvGBSv2-6655_334512710+75	C/G	1	334512785	+	NA	NA	NA	NA	NA	NA	G	G	C	C	C	C	C	C	G	C	C	C	C	C	C	C	G	G	C	C	G	C	G	G	C	C	C	C	C	C	C	C	C	C	G	G	C	C	C
chr1H|HvGBSv2-6476_335983573+17	A/G	1	335983590	+	NA	NA	NA	NA	NA	NA	A	A	A	A	A	A	A	A	A	A	A	A	A	A	A	A	A	A	A	A	A	A	A	A	A	A	A	A	A	A	A	A	A	A	A	A	G	G	A
chr1H|HvGBSv2-6476_335983573+121	A/G	1	335983694	+	NA	NA	NA	NA	NA	NA	A	A	A	A	A	G	A	A	A	A	G	G	A	A	A	A	A	A	A	A	A	A	A	A	G	G	G	A	A	A	A	G	G	G	A	A	A	A	G
chr1H|HvGBSv2-6477_336994666+31	T/C	1	336994697	+	NA	NA	NA	NA	NA	NA	T	T	T	T	T	T	T	T	T	T	T	T	T	T	T	T	T	T	T	T	T	T	T	T	T	T	T	T	T	T	T	T	T	T	T	T	T	T	T
chr1H|HvGBSv2-6477_336994666+49	A/C	1	336994715	+	NA	NA	NA	NA	NA	NA	C	C	A	A	A	A	A	A	C	A	A	A	A	A	A	A	C	C	A	A	C	A	C	C	A	A	A	A	A	A	A	A	A	A	C	C	A	A	A
chr1H|HvGBSv2-6477_336994666+81	A/G	1	336994747	+	NA	NA	NA	NA	NA	NA	A	A	A	A	A	G	A	A	A	A	G	G	A	A	A	A	A	A	A	A	A	A	A	A	G	G	G	A	A	A	A	G	G	G	A	A	A	A	G
chr1H|HvGBSv2-391_337436349+67	C/G	1	337436416	+	NA	NA	NA	NA	NA	NA	C	C	C	C	C	G	C	C	C	C	G	G	C	C	C	C	C	C	C	C	C	C	C	C	G	G	G	C	C	C	C	G	G	G	C	C	C	C	G
chr1H|HvGBSv2-6478_337885854+83	T/C	1	337885937	+	NA	NA	NA	NA	NA	NA	T	T	T	T	T	C	T	T	T	T	Y	C	T	T	T	T	T	T	T	T	T	T	T	T	C	C	C	T	T	T	T	Y	Y	C	T	T	T	T	C
chr1H|HvGBSv2-6478_337885854+86	C/T	1	337885940	+	NA	NA	NA	NA	NA	NA	C	C	C	C	C	C	C	T	C	C	C	C	C	C	C	Y	C	C	C	C	C	C	C	C	C	C	C	C	T	C	C	C	C	C	C	C	Y	T	C
chr1H|HvGBSv2-6479_338835949+25	T/C	1	338835974	+	NA	NA	NA	NA	NA	NA	T	T	T	T	T	T	T	T	T	T	T	T	T	T	T	T	T	T	T	T	T	T	T	T	T	T	T	T	T	T	T	T	T	T	T	T	T	T	T
chr1H|HvGBSv2-6479_338835949+64	G/T	1	338836013	+	NA	NA	NA	NA	NA	NA	G	G	G	G	G	T	G	G	G	G	T	T	G	G	G	G	G	T	G	G	G	G	G	G	T	T	T	G	G	G	G	T	T	T	G	G	G	G	T
chr1H|HvGBSv2-6479_338835949+75	T/C	1	338836024	+	NA	NA	NA	NA	NA	NA	T	T	T	T	T	C	T	T	T	T	C	C	T	T	T	T	T	C	T	T	T	T	T	T	C	C	C	T	T	T	T	C	C	C	T	T	T	T	C
chr1H|HvGBSv2-6479_338835949+123	A/G	1	338836072	+	NA	NA	NA	NA	NA	NA	A	A	A	A	A	A	A	A	A	A	A	A	A	A	A	A	A	A	A	A	A	A	A	A	A	A	A	A	A	A	A	A	A	A	A	A	G	G	A
chr1H|HvGBSv2-6479_338835949+144	A/G	1	338836093	+	NA	NA	NA	NA	NA	NA	A	A	G	G	G	A	G	A	A	G	A	A	G	G	G	A	A	A	G	G	A	G	A	A	A	A	A	G	A	A	G	A	A	A	A	A	A	A	A
chr1H|HvGBSv2-393_339534955+37	A/C	1	339534992	+	NA	NA	NA	NA	NA	NA	A	A	C	C	C	C	C	A	A	C	C	C	C	C	C	A	A	A	C	C	A	C	A	A	C	C	C	C	A	A	C	C	C	C	A	A	A	A	C
chr1H|HvGBSv2-393_339534955+97	T/C	1	339535052	+	NA	NA	NA	NA	NA	NA	T	T	T	T	T	T	T	C	T	T	T	T	T	T	T	C	T	T	T	T	T	T	T	T	T	T	T	T	C	T	T	T	T	T	T	T	C	C	T
chr1H|HvGBSv2-393_339534955+113	A/G	1	339535068	+	NA	NA	NA	NA	NA	NA	A	A	G	G	G	G	G	A	A	G	G	G	G	G	G	A	A	A	G	G	A	G	A	A	G	G	G	G	A	A	G	G	G	G	A	A	A	A	G
chr1H|HvGBSv2-6480_340008684+10	A/T	1	340008694	+	NA	NA	NA	NA	NA	NA	A	A	A	A	A	A	A	T	A	A	A	A	A	A	A	T	A	A	A	A	A	A	A	A	A	A	A	A	T	T	A	A	A	A	A	A	A	A	A
chr1H|HvGBSv2-6480_340008684+158	G/A	1	340008842	+	NA	NA	NA	NA	NA	NA	G	G	A	A	A	G	A	A	G	A	G	G	A	A	A	A	G	G	A	A	G	A	G	G	G	G	G	A	A	A	A	G	G	G	G	G	A	A	G
chr1H|HvGBSv2-394_340502427+63	A/G	1	340502490	+	NA	NA	NA	NA	NA	NA	A	A	G	G	G	A	G	A	A	G	A	A	G	G	G	A	A	A	G	G	A	G	A	A	A	A	A	G	A	A	G	A	A	A	A	A	G	G	A
chr1H|HvGBSv2-394_340502427+101	C/G	1	340502528	+	NA	NA	NA	NA	NA	NA	C	C	C	C	C	G	C	C	C	C	G	G	C	C	C	C	C	C	C	C	C	C	C	C	G	G	G	C	C	C	C	G	G	G	C	C	C	C	G
chr1H|HvGBSv2-394_340502427+108	A/G	1	340502535	+	NA	NA	NA	NA	NA	NA	A	A	A	A	A	A	A	A	A	A	A	A	A	A	A	A	A	A	A	A	A	A	A	A	A	A	A	A	A	G	A	A	A	A	A	A	A	A	A
chr1H|HvGBSv2-394_340502427+115	A/C	1	340502542	+	NA	NA	NA	NA	NA	NA	A	A	A	A	A	A	A	A	A	A	A	A	A	A	A	C	A	A	A	A	A	A	A	A	A	A	A	A	C	C	A	A	A	A	A	A	A	A	A
chr1H|HvGBSv2-394_340502427+132	G/T	1	340502559	+	NA	NA	NA	NA	NA	NA	G	G	G	G	G	G	G	G	G	G	G	G	G	G	G	T	G	G	G	G	G	G	G	G	G	G	G	G	T	T	G	G	G	G	G	G	G	G	G
chr1H|HvGBSv2-395_341499388+118	C/T	1	341499506	+	NA	NA	NA	NA	NA	NA	C	C	T	T	T	T	T	T	C	T	T	T	C	T	C	T	C	C	T	C	C	T	C	C	T	T	T	T	T	C	T	T	T	T	C	C	T	T	T
chr1H|HvGBSv2-6482_341997912+31	T/C	1	341997943	+	NA	NA	NA	NA	NA	NA	T	T	T	T	T	T	T	T	T	T	T	T	T	T	T	T	T	T	T	T	T	T	T	T	T	T	T	T	T	T	T	T	T	T	T	T	T	T	T
chr1H|HvGBSv2-6482_341997912+44	C/T	1	341997956	+	NA	NA	NA	NA	NA	NA	C	C	C	C	C	T	C	C	C	C	C	T	C	C	C	C	C	C	C	C	C	C	C	C	T	T	T	C	C	T	C	T	T	T	C	C	T	T	T
chr1H|HvGBSv2-6482_341997912+75	T/C	1	341997987	+	NA	NA	NA	NA	NA	NA	T	T	T	T	T	C	T	T	T	T	T	C	T	T	T	T	T	T	T	T	T	T	T	T	C	C	C	T	T	T	T	C	C	C	T	T	T	T	C
chr1H|HvGBSv2-6482_341997912+100	C/T	1	341998012	+	NA	NA	NA	NA	NA	NA	C	C	C	C	T	C	T	C	C	T	C	C	T	T	T	C	C	C	T	T	C	C	C	C	C	C	C	C	C	C	C	C	C	C	C	C	C	C	C
chr1H|HvGBSv2-6718_342210125+27	T/C	1	342210152	+	NA	NA	NA	NA	NA	NA	T	T	T	T	T	T	T	T	T	T	T	T	T	T	T	T	T	T	T	T	T	T	T	T	T	T	T	T	T	T	T	T	T	T	T	T	C	C	T
chr1H|HvGBSv2-4292_342673466+97	G/T	1	342673563	+	NA	NA	NA	NA	NA	NA	T	G	T	T	T	G	T	T	G	T	G	G	T	T	T	T	G	G	T	T	G	T	G	G	G	G	G	G	T	T	G	G	G	G	G	G	G	G	G
chr1H|HvGBSv2-4292_342673466+135	A/G	1	342673601	+	NA	NA	NA	NA	NA	NA	G	A	G	G	G	A	G	G	A	G	A	A	G	G	G	G	A	A	G	G	A	G	A	A	A	A	A	A	G	G	A	A	A	A	A	A	A	A	A
chr1H|HvGBSv2-6483_342997896+10	T/A	1	342997906	+	NA	NA	NA	NA	NA	NA	T	T	T	T	T	A	T	T	T	T	T	A	T	T	T	T	T	T	T	T	T	T	T	T	A	A	A	T	T	T	T	A	A	A	T	T	T	T	A
chr1H|HvGBSv2-6483_342997896+44	C/T	1	342997940	+	NA	NA	NA	NA	NA	NA	C	C	C	C	C	T	C	C	C	C	C	T	C	C	C	C	C	C	C	C	C	C	C	C	T	T	T	C	C	C	C	T	T	T	C	C	C	C	T
chr1H|HvGBSv2-6483_342997896+70	G/C	1	342997966	+	NA	NA	NA	NA	NA	NA	C	G	C	C	G	G	G	C	G	G	G	G	G	G	G	C	G	G	G	G	G	C	C	G	G	G	G	G	G	G	C	G	G	G	G	G	G	G	G
chr1H|HvGBSv2-6483_342997896+118	C/G	1	342998014	+	NA	NA	NA	NA	NA	NA	C	C	C	C	C	G	C	C	C	C	C	G	C	C	C	C	C	C	C	C	C	C	C	C	G	G	G	C	C	C	C	G	G	G	C	C	C	C	G
chr1H|HvGBSv2-6483_342997896+151	A/G	1	342998047	+	NA	NA	NA	NA	NA	NA	A	G	A	A	A	A	A	A	G	A	G	A	A	A	A	A	G	G	A	A	G	A	G	G	A	A	A	G	A	A	A	A	A	A	G	G	A	A	A
chr1H|HvGBSv2-6483_342997896+163	C/A	1	342998059	+	NA	NA	NA	NA	NA	NA	C	C	C	C	C	C	C	C	C	C	C	C	C	C	C	C	C	C	C	C	C	C	C	C	C	C	C	C	C	C	C	C	C	C	C	C	C	C	C
chr1H|HvGBSv2-6483_342997896+171	G/A	1	342998067	+	NA	NA	NA	NA	NA	NA	G	G	G	G	G	A	G	G	G	G	G	A	G	G	G	G	G	G	G	G	G	G	G	G	A	A	A	G	G	G	G	A	A	A	G	G	G	G	A
chr1H|HvGBSv2-834_344602390+46	A/G	1	344602436	+	NA	NA	NA	NA	NA	NA	A	A	A	A	A	A	A	A	A	A	A	A	A	A	A	A	A	A	A	A	A	A	A	A	A	A	A	A	A	A	A	A	A	A	A	A	G	R	A
chr1H|HvGBSv2-834_344602390+60	A/G	1	344602450	+	NA	NA	NA	NA	NA	NA	A	A	A	A	G	A	G	A	A	G	A	A	G	G	G	A	A	A	R	G	A	A	A	A	A	A	A	A	A	A	G	A	A	A	A	A	A	A	A
chr1H|HvGBSv2-834_344602390+84	G/C	1	344602474	+	NA	NA	NA	NA	NA	NA	G	G	G	G	G	G	G	G	C	G	C	G	G	G	G	G	G	G	G	G	G	G	G	C	G	G	G	G	G	G	G	G	G	G	C	G	G	G	G
chr1H|HvGBSv2-834_344602390+141	A/T	1	344602531	+	NA	NA	NA	NA	NA	NA	A	A	A	W	A	A	A	A	A	A	A	A	A	A	A	A	A	A	W	A	A	A	A	A	A	A	A	A	A	A	A	A	A	A	A	A	A	W	A
chr1H|HvGBSv2-834_344757814+46	A/G	1	344757860	+	NA	NA	NA	NA	NA	NA	A	A	A	A	A	A	A	A	A	A	A	A	A	A	A	A	A	A	A	A	A	A	A	A	A	A	A	A	A	A	A	A	A	A	A	A	G	R	A
chr1H|HvGBSv2-834_344757814+60	A/G	1	344757874	+	NA	NA	NA	NA	NA	NA	A	A	A	A	G	A	G	A	A	G	A	A	G	G	G	A	A	A	R	G	A	A	A	A	A	A	A	A	A	A	G	A	A	A	A	A	A	A	A
chr1H|HvGBSv2-834_344757814+84	G/C	1	344757898	+	NA	NA	NA	NA	NA	NA	G	G	G	G	G	G	G	G	C	G	C	G	G	G	G	G	G	G	G	G	G	G	G	C	G	G	G	G	G	G	G	G	G	G	C	G	G	G	G
chr1H|HvGBSv2-834_344757814+141	A/T	1	344757955	+	NA	NA	NA	NA	NA	NA	A	A	A	W	A	A	A	A	A	A	A	A	A	A	A	A	A	A	W	A	A	A	A	A	A	A	A	A	A	A	A	A	A	A	A	A	A	W	A
chr1H|HvGBSv2-6486_346028507+66	T/C	1	346028573	+	NA	NA	NA	NA	NA	NA	T	T	C	C	T	T	T	C	T	T	T	T	T	T	T	C	T	T	T	T	T	C	T	T	T	T	T	T	C	T	T	T	T	T	T	T	T	T	T
chr1H|HvGBSv2-6486_346028507+110	T/C	1	346028617	+	NA	NA	NA	NA	NA	NA	C	C	C	C	C	C	C	C	T	C	C	T	C	C	C	C	T	T	C	C	T	C	T	T	T	T	C	T	C	T	C	C	C	T	T	T	T	T	C
chr1H|HvGBSv2-6486_346028507+165	G/A	1	346028672	+	NA	NA	NA	NA	NA	NA	A	A	A	A	A	A	A	A	G	A	A	G	A	A	A	A	G	G	A	A	G	A	G	G	G	G	A	G	A	G	A	A	A	G	G	G	G	G	A
chr1H|HvGBSv2-400_346522155+10	T/C	1	346522165	+	NA	NA	NA	NA	NA	NA	C	C	C	C	T	C	T	C	T	T	C	T	T	T	T	T	T	T	T	T	T	C	T	T	T	C	C	T	C	T	T	T	T	T	T	C	T	C	T
chr1H|HvGBSv2-400_346522155+27	T/C	1	346522182	+	NA	NA	NA	NA	NA	NA	T	T	T	T	T	T	T	T	C	T	T	C	T	T	T	T	C	C	T	T	C	T	C	C	C	T	T	T	T	T	T	C	C	C	C	T	C	T	C
chr1H|HvGBSv2-400_346522155+53	T/C	1	346522208	+	NA	NA	NA	NA	NA	NA	T	T	T	T	T	T	T	T	C	T	T	C	T	T	T	T	C	C	T	T	C	T	C	C	C	T	T	T	T	T	T	C	C	C	C	T	C	T	C
chr1H|HvGBSv2-400_346522155+77	A/G	1	346522232	+	NA	NA	NA	NA	NA	NA	A	A	A	A	A	A	A	A	G	A	A	A	A	A	A	A	G	G	A	A	G	A	G	G	A	A	A	A	A	A	A	A	A	A	G	A	A	A	A
chr1H|HvGBSv2-400_346522155+89	T/C	1	346522244	+	NA	NA	NA	NA	NA	NA	T	T	T	T	T	T	T	T	C	T	T	C	T	T	T	T	C	C	T	T	C	T	C	C	C	T	T	T	T	T	T	C	C	C	C	T	C	T	C
chr1H|HvGBSv2-400_346522155+144	T/C	1	346522299	+	NA	NA	NA	NA	NA	NA	C	C	C	C	T	C	T	C	T	T	C	T	T	T	T	T	T	T	T	T	T	C	T	T	T	C	C	T	C	T	T	T	T	T	T	C	T	C	T
chr1H|HvGBSv2-6487_347015236+9	C/T	1	347015245	+	NA	NA	NA	NA	NA	NA	T	T	T	T	C	T	C	T	C	C	T	C	C	C	C	C	C	C	C	C	C	T	C	C	C	T	T	C	T	C	C	C	C	C	C	T	C	T	C
chr1H|HvGBSv2-6487_347015236+28	T/C	1	347015264	+	NA	NA	NA	NA	NA	NA	C	C	C	C	T	C	T	C	T	T	C	T	T	T	T	T	T	T	T	T	T	C	T	T	T	C	C	T	C	T	T	T	T	T	T	C	T	C	T
chr1H|HvGBSv2-6487_347015236+30	G/A	1	347015266	+	NA	NA	NA	NA	NA	NA	A	A	A	A	G	A	G	A	G	G	A	G	G	G	G	G	G	G	G	G	G	A	G	G	G	A	A	G	A	G	G	G	G	G	G	A	G	A	G
chr1H|HvGBSv2-6487_347015236+128	G/T	1	347015364	+	NA	NA	NA	NA	NA	NA	G	G	G	G	G	G	G	G	T	G	G	G	G	G	G	G	T	T	G	G	T	G	T	T	G	G	G	G	G	G	G	G	G	G	T	G	G	G	G
chr1H|HvGBSv2-6487_347015236+130	G/A	1	347015366	+	NA	NA	NA	NA	NA	NA	A	A	A	A	G	A	G	A	G	G	A	G	G	G	G	G	G	G	G	G	G	A	G	G	G	A	A	G	A	G	G	G	G	G	G	A	G	A	G
chr1H|HvGBSv2-401_347497760+4	T/C	1	347497764	+	NA	NA	NA	NA	NA	NA	T	T	T	T	T	T	T	T	C	T	T	T	T	T	T	T	C	C	T	T	C	T	C	C	T	T	T	T	T	T	T	C	C	T	C	T	C	T	T
chr1H|HvGBSv2-401_347497760+30	G/C	1	347497790	+	NA	NA	NA	NA	NA	NA	C	C	C	C	C	C	C	C	G	C	G	G	C	C	G	C	G	G	C	C	G	C	G	G	G	C	C	G	C	C	C	G	G	G	G	C	G	C	G
chr1H|HvGBSv2-401_347497760+32	A/G	1	347497792	+	NA	NA	NA	NA	NA	NA	A	A	A	A	A	A	A	A	A	A	A	A	A	A	A	G	A	A	A	A	A	A	A	A	G	A	A	G	A	A	A	A	A	G	A	A	A	A	G
chr1H|HvGBSv2-401_347497760+162	C/A	1	347497922	+	NA	NA	NA	NA	NA	NA	A	A	A	A	A	A	A	A	C	A	C	C	A	A	C	A	C	C	A	A	C	A	C	C	C	A	A	C	A	A	A	C	C	C	C	A	C	A	C
chr1H|HvGBSv2-401_347497760+168	A/G	1	347497928	+	NA	NA	NA	NA	NA	NA	A	A	A	A	A	A	A	A	A	A	A	A	A	A	A	G	A	A	A	A	A	A	A	A	G	A	A	G	A	A	A	A	A	G	A	A	A	A	G
chr1H|HvGBSv2-11234_347935928+13	G/A	1	347935941	+	NA	NA	NA	NA	NA	NA	A	A	A	A	G	A	G	A	G	G	A	G	G	G	G	G	G	G	G	G	G	A	G	G	G	A	A	G	A	G	G	G	G	G	G	A	G	A	G
chr1H|HvGBSv2-6489_349011102+5	A/G	1	349011107	+	NA	NA	NA	NA	NA	NA	A	A	A	A	A	A	A	A	A	A	A	G	A	A	A	G	A	A	A	A	A	A	A	A	G	A	A	G	A	A	A	A	A	G	A	A	A	A	G
chr1H|HvGBSv2-6489_349011102+27	T/C	1	349011129	+	NA	NA	NA	NA	NA	NA	T	T	T	T	T	T	T	T	T	T	T	T	T	T	T	T	T	T	T	T	T	T	T	T	T	T	T	T	T	T	T	C	C	T	T	T	T	T	T
chr1H|HvGBSv2-6489_349011102+138	T/C	1	349011240	+	NA	NA	NA	NA	NA	NA	T	T	T	T	T	T	T	T	T	T	T	C	T	T	T	C	T	T	T	T	T	T	T	T	C	T	T	C	T	T	T	T	T	C	T	T	T	T	C
chr1H|HvGBSv2-6489_349011102+153	T/C	1	349011255	+	NA	NA	NA	NA	NA	NA	C	C	C	C	T	C	T	C	T	C	T	T	C	T	T	T	T	T	T	C	T	C	T	T	T	C	C	T	C	T	T	T	T	T	T	C	T	C	T
chr1H|HvGBSv2-968_349247005+130	C/G	1	349247135	+	NA	NA	NA	NA	NA	NA	C	C	C	C	C	C	C	C	G	C	C	G	C	C	C	C	G	C	C	C	C	C	C	G	C	C	C	C	C	C	C	C	C	C	C	C	C	C	C
chr1H|HvGBSv2-968_349247005+135	T/G	1	349247140	+	NA	NA	NA	NA	NA	NA	T	T	T	T	T	T	T	T	G	T	T	T	T	T	T	T	G	G	T	T	G	T	G	G	T	T	T	T	T	T	T	G	G	T	G	T	T	T	T
chr1H|HvGBSv2-403_349489372+10	A/T	1	349489382	+	NA	NA	NA	NA	NA	NA	T	T	T	T	A	T	A	T	A	T	A	A	T	A	A	A	A	A	A	T	A	T	A	A	A	T	T	A	T	A	A	A	A	A	A	T	A	T	A
chr1H|HvGBSv2-403_349489372+99	C/T	1	349489471	+	NA	NA	NA	NA	NA	NA	C	C	C	C	C	C	C	C	T	C	C	C	C	C	C	C	T	T	C	C	T	C	T	T	C	C	C	C	C	C	C	T	T	C	T	C	C	C	C
chr1H|HvGBSv2-11116_349816668+18	C/T	1	349816686	+	NA	NA	NA	NA	NA	NA	C	C	C	C	C	C	C	C	C	C	C	T	C	C	C	T	C	C	C	C	C	C	C	C	T	C	C	T	C	C	C	C	C	T	C	C	C	C	T
chr1H|HvGBSv2-11116_349816668+21	A/G	1	349816689	+	NA	NA	NA	NA	NA	NA	A	A	A	A	G	A	A	A	A	A	G	A	A	G	G	A	A	A	G	A	A	A	A	A	A	G	A	A	A	A	G	A	A	A	A	G	G	A	A
chr1H|HvGBSv2-11116_349816668+31	A/C	1	349816699	+	NA	NA	NA	NA	NA	NA	C	C	C	C	A	C	A	C	A	C	A	A	C	A	A	A	A	A	A	C	A	C	A	A	A	A	C	A	C	A	A	A	A	A	A	A	A	C	A
chr1H|HvGBSv2-11116_349816668+51	G/T	1	349816719	+	NA	NA	NA	NA	NA	NA	G	G	G	G	G	G	G	G	G	G	G	G	G	G	G	G	G	K	G	G	G	G	G	G	G	G	G	G	G	G	G	G	G	G	G	G	G	G	G
chr1H|HvGBSv2-11116_349816668+66	A/C	1	349816734	+	NA	NA	NA	NA	NA	NA	C	C	C	C	A	C	A	C	A	C	A	A	C	A	A	A	A	A	A	C	A	C	A	A	A	A	C	A	C	A	A	A	A	A	A	A	A	C	A
chr1H|HvGBSv2-11116_349816668+69	T/C	1	349816737	+	NA	NA	NA	NA	NA	NA	T	T	T	T	T	T	T	T	C	T	T	T	T	T	T	T	C	C	T	T	C	T	C	C	T	T	T	T	T	T	T	C	C	T	C	T	T	T	T
chr1H|HvGBSv2-11116_349816668+99	G/A	1	349816767	+	NA	NA	NA	NA	NA	NA	G	G	G	G	G	G	G	G	A	G	G	G	G	G	G	G	A	A	G	G	A	G	A	A	G	G	G	G	G	G	G	A	A	G	A	G	G	G	G
chr1H|HvGBSv2-11116_349816668+100	T/C	1	349816768	+	NA	NA	NA	NA	NA	NA	T	T	T	T	T	T	T	T	C	T	T	T	T	T	T	T	C	C	T	T	C	T	C	C	T	T	T	T	T	T	T	C	C	T	C	T	T	T	T
chr1H|HvGBSv2-11116_349816668+114	A/G	1	349816782	+	NA	NA	NA	NA	NA	NA	A	A	A	A	A	A	A	A	A	A	A	G	A	A	A	G	A	A	A	A	A	A	A	A	G	A	A	G	A	A	A	A	A	G	A	A	A	A	G
chr1H|HvGBSv2-11116_349816668+123	C/A	1	349816791	+	NA	NA	NA	NA	NA	NA	C	C	C	C	C	C	C	C	A	C	C	C	C	C	C	C	A	A	C	C	A	C	A	A	C	C	C	C	C	C	C	A	A	C	A	C	C	C	C
chr1H|HvGBSv2-11116_349816668+169	A/C	1	349816837	+	NA	NA	NA	NA	NA	NA	A	A	A	A	A	A	A	A	C	A	A	A	A	A	A	A	C	C	A	A	C	A	C	C	A	A	A	A	A	A	A	C	C	A	C	A	A	A	A
chr1H|HvGBSv2-404_350484002+12	A/G	1	350484014	+	NA	NA	NA	NA	NA	NA	A	A	A	A	A	A	A	A	A	A	A	A	R	A	A	A	A	A	A	A	A	A	A	A	A	A	A	A	A	A	A	A	A	A	A	A	A	A	R
chr1H|HvGBSv2-404_350484002+17	T/C	1	350484019	+	NA	NA	NA	NA	NA	NA	T	T	T	T	T	T	T	T	T	T	T	T	Y	T	T	Y	T	T	T	T	T	T	T	T	T	Y	T	Y	T	T	T	T	T	T	T	T	T	T	Y
chr1H|HvGBSv2-404_350484002+28	A/G	1	350484030	+	NA	NA	NA	NA	NA	NA	A	A	A	A	A	A	A	A	A	A	A	A	R	A	A	A	A	A	A	A	A	A	A	A	A	A	A	A	A	A	A	A	A	A	A	A	A	A	R
chr1H|HvGBSv2-404_350484002+59	C/T	1	350484061	+	NA	NA	NA	NA	NA	NA	C	C	C	C	C	C	C	C	C	C	C	C	Y	C	C	Y	C	C	C	C	C	C	C	C	C	Y	C	Y	C	C	C	C	C	C	C	C	C	C	Y
chr1H|HvGBSv2-404_350484002+70	A/T	1	350484072	+	NA	NA	NA	NA	NA	NA	A	A	A	A	A	A	A	A	A	A	A	A	W	A	A	A	A	A	A	A	A	A	A	A	A	A	A	A	A	A	A	A	A	A	A	A	A	A	W
chr1H|HvGBSv2-404_350484002+73	A/G	1	350484075	+	NA	NA	NA	NA	NA	NA	A	A	A	A	A	A	A	A	A	A	A	A	R	A	A	A	A	A	A	A	A	A	A	A	A	A	A	A	A	A	A	A	A	A	A	A	A	A	R
chr1H|HvGBSv2-404_350484002+82	A/G	1	350484084	+	NA	NA	NA	NA	NA	NA	A	A	A	A	A	A	A	A	A	A	A	A	A	A	A	R	A	A	A	A	A	A	A	A	A	R	A	R	A	A	A	A	A	A	A	A	A	A	A
chr1H|HvGBSv2-404_350484002+102	T/C	1	350484104	+	NA	NA	NA	NA	NA	NA	T	T	T	T	T	T	T	T	T	T	T	T	Y	T	T	T	T	T	T	T	T	T	T	T	T	T	T	T	T	T	T	T	T	T	T	T	T	T	Y
chr1H|HvGBSv2-404_350484002+114	A/C	1	350484116	+	NA	NA	NA	NA	NA	NA	A	A	A	A	A	A	A	A	A	A	A	A	A	A	A	M	A	A	A	A	A	A	A	A	A	M	A	M	A	A	A	A	A	A	A	A	A	A	A
chr1H|HvGBSv2-404_350484002+119	C/T	1	350484121	+	NA	NA	NA	NA	NA	NA	C	C	C	C	C	C	C	C	C	C	C	C	Y	C	C	Y	C	C	C	C	C	C	C	C	C	Y	C	Y	C	C	C	C	C	C	C	C	C	C	Y
chr1H|HvGBSv2-404_350484002+122	A/C	1	350484124	+	NA	NA	NA	NA	NA	NA	A	A	A	A	A	A	A	A	C	A	A	A	A	A	A	A	C	C	A	A	C	A	C	C	A	A	A	A	A	A	A	A	A	A	C	A	A	A	A
chr1H|HvGBSv2-404_350484002+124	A/G	1	350484126	+	NA	NA	NA	NA	NA	NA	A	A	A	A	A	A	A	A	A	A	A	A	R	A	A	A	A	A	A	A	A	A	A	A	A	A	A	A	A	A	A	A	A	A	A	A	A	A	R
chr1H|HvGBSv2-404_350484002+133	G/C	1	350484135	+	NA	NA	NA	NA	NA	NA	G	G	G	G	G	G	G	G	G	G	G	G	S	G	G	S	G	G	G	G	G	G	G	G	G	S	G	S	G	G	G	G	G	G	G	G	G	G	S
chr1H|HvGBSv2-404_350484002+144	A/T	1	350484146	+	NA	NA	NA	NA	NA	NA	A	A	A	A	A	A	A	A	A	A	A	A	A	A	A	W	A	A	A	A	A	A	A	A	A	W	A	W	A	A	A	A	A	A	A	A	A	A	A
chr1H|HvGBSv2-404_350484002+145	A/G	1	350484147	+	NA	NA	NA	NA	NA	NA	A	A	A	A	A	A	A	A	A	A	A	A	A	A	A	R	A	A	A	A	A	A	A	A	A	R	A	R	A	A	A	A	A	A	A	A	A	A	A
chr1H|HvGBSv2-404_350484002+148	A/G	1	350484150	+	NA	NA	NA	NA	NA	NA	A	A	A	A	A	A	A	A	A	A	A	A	R	A	A	A	A	A	A	A	A	A	A	A	A	A	A	A	A	A	A	A	A	A	A	A	A	A	R
chr1H|HvGBSv2-404_350484002+164	C/T	1	350484166	+	NA	NA	NA	NA	NA	NA	C	C	C	C	C	C	T	C	C	T	T	C	C	T	C	Y	C	C	C	T	C	C	C	C	T	C	C	Y	C	C	C	C	C	C	C	C	T	C	Y
chr1H|HvGBSv2-6491_350974138+74	A/T	1	350974212	+	NA	NA	NA	NA	NA	NA	A	A	A	A	T	A	A	A	T	A	A	A	A	T	A	T	T	T	T	A	T	A	T	T	A	A	A	T	A	T	A	T	T	A	T	A	T	A	T
chr1H|HvGBSv2-405_351495930+32	T/G	1	351495962	+	NA	NA	NA	NA	NA	NA	T	T	T	T	T	T	T	T	T	T	T	T	T	T	T	T	T	T	T	T	T	T	T	T	T	T	T	T	T	T	T	G	G	T	T	T	T	T	T
chr1H|HvGBSv2-405_351495930+36	G/A	1	351495966	+	NA	NA	NA	NA	NA	NA	G	G	G	G	G	G	G	G	A	G	G	G	G	G	G	G	A	A	G	G	A	G	A	A	G	G	G	G	G	G	G	A	A	G	A	G	G	G	G
chr1H|HvGBSv2-405_351495930+55	A/G	1	351495985	+	NA	NA	NA	NA	NA	NA	A	A	A	A	A	A	A	A	G	A	A	A	A	A	A	A	G	G	A	A	G	A	G	G	A	A	A	A	A	A	A	G	G	A	G	A	A	A	A
chr1H|HvGBSv2-405_351495930+56	G/A	1	351495986	+	NA	NA	NA	NA	NA	NA	G	G	G	G	G	G	G	G	A	G	G	G	G	G	G	G	A	A	G	G	A	G	A	A	G	G	G	G	G	G	G	A	A	G	A	G	G	G	G
chr1H|HvGBSv2-6492_351866245+23	C/T	1	351866268	+	NA	NA	NA	NA	NA	NA	C	C	C	C	T	T	T	C	C	T	T	C	C	T	T	T	C	C	T	T	C	C	C	C	T	T	T	T	C	C	C	C	C	C	C	T	T	C	T
chr1H|HvGBSv2-6492_351866245+119	G/A	1	351866364	+	NA	NA	NA	NA	NA	NA	G	G	G	G	G	G	G	G	A	G	G	G	G	G	G	G	A	A	G	G	A	G	A	A	G	G	G	G	G	G	G	A	A	G	A	G	G	G	G
chr1H|HvGBSv2-406_352305791+102	C/T	1	352305893	+	NA	NA	NA	NA	NA	NA	C	T	C	C	C	C	C	T	C	Y	C	T	T	C	C	C	C	C	C	C	C	C	C	C	C	C	C	C	T	C	T	T	T	C	C	C	C	C	C
chr1H|HvGBSv2-6493_353006381+40	A/G	1	353006421	+	NA	NA	NA	NA	NA	NA	A	A	A	A	G	A	A	A	A	A	A	A	A	A	A	A	A	A	G	A	A	A	A	A	A	A	A	A	A	A	A	A	A	A	A	A	G	A	A
chr1H|HvGBSv2-6493_353006381+47	T/G	1	353006428	+	NA	NA	NA	NA	NA	NA	T	T	T	T	T	T	G	T	T	G	G	T	T	G	T	G	T	T	T	G	T	T	T	T	G	T	T	G	T	T	T	T	T	T	T	T	T	T	G
chr1H|HvGBSv2-6493_353006381+48	T/G	1	353006429	+	NA	NA	NA	NA	NA	NA	T	T	T	T	T	T	G	T	T	G	G	T	T	G	T	G	T	T	T	G	T	T	T	T	G	T	T	G	T	T	T	T	T	T	T	T	T	T	G
chr1H|HvGBSv2-6493_353006381+161	A/G	1	353006542	+	NA	NA	NA	NA	NA	NA	A	A	A	A	A	A	A	A	G	A	A	A	A	A	A	A	G	G	A	A	G	A	G	G	A	A	A	A	A	A	A	A	A	A	G	A	A	A	A
chr1H|HvGBSv2-407_353501146+24	G/A	1	353501170	+	NA	NA	NA	NA	NA	NA	G	G	G	G	G	G	A	G	G	A	A	G	G	A	G	A	G	G	G	A	G	G	G	G	A	G	G	A	G	G	G	G	G	G	G	G	G	G	A
chr1H|HvGBSv2-407_353501146+35	G/T	1	353501181	+	NA	NA	NA	NA	NA	NA	G	G	G	G	T	G	G	G	T	G	G	G	G	G	G	G	T	T	T	G	T	G	T	T	G	G	G	G	G	G	G	G	G	G	T	G	T	G	G
chr1H|HvGBSv2-407_353501146+39	T/C	1	353501185	+	NA	NA	NA	NA	NA	NA	T	T	T	T	C	T	T	T	T	T	T	T	T	T	T	T	T	T	C	T	T	T	T	T	T	T	T	T	T	T	T	T	T	T	T	T	C	T	T
chr1H|HvGBSv2-407_353501146+100	C/T	1	353501246	+	NA	NA	NA	NA	NA	NA	C	C	C	C	T	C	C	C	C	C	C	C	C	C	C	C	C	C	T	C	C	C	C	C	C	C	C	C	C	C	C	C	C	C	C	C	T	C	C
chr1H|HvGBSv2-408_354495049+6	T/C	1	354495055	+	NA	NA	NA	NA	NA	NA	T	T	T	T	T	T	T	T	Y	T	T	Y	T	T	T	T	C	C	T	T	C	T	C	C	T	T	T	T	T	T	T	T	T	T	Y	T	T	T	T
chr1H|HvGBSv2-6496_355819545+142	A/G	1	355819687	+	NA	NA	NA	NA	NA	NA	A	A	G	G	A	A	A	G	A	A	A	A	A	A	A	G	A	A	A	A	A	G	A	A	A	A	A	A	G	G	A	G	G	G	A	G	A	G	A
chr1H|HvGBSv2-6497_356999526+70	G/A	1	356999596	+	NA	NA	NA	NA	NA	NA	G	G	A	A	G	G	G	A	G	G	G	G	G	G	G	A	G	G	G	G	G	A	G	G	G	G	G	G	A	A	G	A	A	A	G	A	G	A	G
chr1H|HvGBSv2-6498_358003398+116	T/C	1	358003514	+	NA	NA	NA	NA	NA	NA	T	T	C	C	T	T	T	C	T	T	T	T	T	T	T	C	T	T	T	T	T	C	T	T	T	T	T	T	C	C	T	C	C	C	T	C	T	C	T
chr1H|HvGBSv2-6498_358003398+137	T/A	1	358003535	+	NA	NA	NA	NA	NA	NA	T	T	T	T	T	T	T	T	A	T	T	T	T	T	T	T	A	A	T	T	A	T	A	A	T	T	T	T	T	T	T	T	T	T	A	T	T	T	T
chr1H|HvGBSv2-3234_358332342+26	A/G	1	358332368	+	NA	NA	NA	NA	NA	NA	A	A	A	A	A	A	A	A	G	A	A	G	A	A	A	A	G	G	A	A	G	A	G	G	A	A	A	A	A	A	A	A	A	A	G	A	A	A	A
chr1H|HvGBSv2-3234_358332342+49	G/C	1	358332391	+	NA	NA	NA	NA	NA	NA	G	G	C	C	G	G	G	C	G	G	G	G	G	G	G	C	G	G	G	G	G	C	G	G	G	G	G	G	C	C	G	C	C	C	G	C	G	C	G
chr1H|HvGBSv2-3234_358332342+58	T/C	1	358332400	+	NA	NA	NA	NA	NA	NA	T	T	T	T	T	T	T	T	C	T	T	C	T	T	T	T	C	C	T	T	C	T	C	C	T	T	T	T	T	T	T	T	T	T	C	T	T	T	T
chr1H|HvGBSv2-3234_358332342+101	C/T	1	358332443	+	NA	NA	NA	NA	NA	NA	T	C	C	C	C	C	T	C	C	T	T	C	C	T	C	T	C	C	C	T	C	C	C	C	T	C	C	T	C	C	C	C	C	C	C	C	C	C	T
chr1H|HvGBSv2-3234_358332342+112	A/G	1	358332454	+	NA	NA	NA	NA	NA	NA	A	A	G	G	A	A	A	G	A	A	A	A	A	A	A	G	A	A	A	A	A	G	A	A	A	A	A	A	G	G	A	G	G	G	A	G	A	G	A
chr1H|HvGBSv2-3234_358332342+125	C/G	1	358332467	+	NA	NA	NA	NA	NA	NA	C	C	G	G	C	C	C	G	C	C	C	C	C	C	C	G	C	C	C	C	C	G	C	C	C	C	C	C	G	G	C	G	G	G	C	G	C	G	C
chr1H|HvGBSv2-412_358493268+106	C/T	1	358493374	+	NA	NA	NA	NA	NA	NA	C	C	T	T	C	C	C	T	C	C	C	C	C	C	C	T	C	C	C	C	C	T	C	C	C	C	C	C	T	T	C	T	T	T	C	T	C	T	C
chr1H|HvGBSv2-413_359499315+18	T/C	1	359499333	+	NA	NA	NA	NA	NA	NA	T	T	T	T	T	T	T	T	C	T	T	T	T	T	T	T	C	C	T	T	C	T	C	C	T	T	T	T	T	T	T	T	T	T	C	T	T	T	T
chr1H|HvGBSv2-413_359499315+56	T/C	1	359499371	+	NA	NA	NA	NA	NA	NA	T	T	C	C	T	T	T	C	T	T	T	T	T	T	T	C	T	T	T	T	T	C	T	T	T	T	T	T	C	C	T	C	C	C	T	C	T	C	T
chr1H|HvGBSv2-413_359499315+129	T/C	1	359499444	+	NA	NA	NA	NA	NA	NA	C	C	T	T	C	T	C	T	T	C	C	T	C	C	C	T	T	T	C	C	T	T	T	T	C	C	C	C	T	T	T	T	T	T	T	C	T	T	T
chr1H|HvGBSv2-6500_360030123+113	G/T	1	360030236	+	NA	NA	NA	NA	NA	NA	G	G	T	T	G	T	G	T	G	G	G	G	G	G	G	T	G	G	G	G	G	T	G	G	G	T	T	G	T	T	G	T	T	T	G	T	G	T	G
chr1H|HvGBSv2-6501_360999924+63	C/T	1	360999987	+	NA	NA	NA	NA	NA	NA	C	C	T	T	C	T	C	T	C	C	C	C	C	C	C	T	C	C	C	C	C	T	C	C	C	T	T	C	T	T	C	T	T	T	C	T	C	T	C
chr1H|HvGBSv2-6501_360999924+94	T/C	1	361000018	+	NA	NA	NA	NA	NA	NA	T	T	T	T	T	T	T	T	C	T	T	C	T	T	T	T	C	C	T	T	C	T	C	C	C	T	T	T	T	T	T	T	T	T	C	T	T	T	T
chr1H|HvGBSv2-6501_360999924+107	T/A	1	361000031	+	NA	NA	NA	NA	NA	NA	T	T	T	T	T	T	T	T	A	T	T	A	T	T	T	T	A	A	T	T	A	T	A	A	A	T	T	T	T	T	T	T	T	T	A	T	T	T	T
chr1H|HvGBSv2-3995_361440253+58	T/C	1	361440311	+	NA	NA	NA	NA	NA	NA	T	C	C	C	C	T	T	T	T	T	T	T	C	T	C	T	T	T	C	T	T	C	T	T	T	T	T	T	C	C	C	T	T	T	T	T	C	C	T
chr1H|HvGBSv2-3995_361440253+76	T/G	1	361440329	+	NA	NA	NA	NA	NA	NA	T	G	G	G	G	T	T	T	T	T	T	T	G	T	G	T	T	T	G	T	T	G	T	T	T	T	T	T	G	G	G	T	T	T	T	T	G	G	T
chr1H|HvGBSv2-3995_361440253+81	A/C	1	361440334	+	NA	NA	NA	NA	NA	NA	A	A	A	A	A	A	C	A	A	C	C	A	A	C	A	C	A	A	A	C	A	A	A	A	A	A	A	C	A	A	A	A	A	A	A	A	A	A	C
chr1H|HvGBSv2-3995_361440253+118	T/C	1	361440371	+	NA	NA	NA	NA	NA	NA	T	C	C	C	C	T	T	T	T	T	T	T	C	T	C	T	T	T	C	T	T	C	T	T	T	T	T	T	C	C	C	T	T	T	T	T	C	C	T
chr1H|HvGBSv2-3995_361440253+139	C/T	1	361440392	+	NA	NA	NA	NA	NA	NA	C	T	T	T	T	C	C	C	C	C	C	C	T	C	T	C	C	C	T	C	C	T	C	C	C	C	C	C	T	T	T	C	C	C	C	C	T	T	C
chr1H|HvGBSv2-3995_361440253+154	C/T	1	361440407	+	NA	NA	NA	NA	NA	NA	C	C	C	C	C	C	T	C	C	T	T	C	C	T	C	T	C	C	C	T	C	C	C	C	C	C	C	T	C	C	C	C	C	C	C	C	C	C	T
chr1H|HvGBSv2-3995_361440253+161	A/G	1	361440414	+	NA	NA	NA	NA	NA	NA	A	A	A	A	A	R	A	R	G	A	A	G	A	A	A	A	G	G	A	A	G	A	G	G	G	A	A	A	A	A	A	A	A	A	G	A	A	A	A
chr1H|HvGBSv2-415_361506140+4	T/G	1	361506144	+	NA	NA	NA	NA	NA	NA	G	T	T	T	T	G	T	G	T	T	T	T	T	T	T	T	T	T	T	T	T	T	T	T	T	G	G	T	T	T	T	G	G	G	T	G	T	T	T
chr1H|HvGBSv2-415_361506140+30	C/T	1	361506170	+	NA	NA	NA	NA	NA	NA	C	C	C	C	C	C	Y	C	C	C	C	C	C	C	C	C	C	C	C	T	C	C	C	C	C	C	C	Y	C	C	C	C	C	C	C	C	C	C	C
chr1H|HvGBSv2-415_361506140+47	T/A	1	361506187	+	NA	NA	NA	NA	NA	NA	A	T	W	T	T	A	W	A	T	T	T	T	T	T	T	T	T	T	T	A	T	A	T	T	W	A	A	W	T	T	T	A	A	A	W	A	T	T	T
chr1H|HvGBSv2-415_361506140+50	A/G	1	361506190	+	NA	NA	NA	NA	NA	NA	G	A	R	A	A	G	R	G	A	A	A	A	A	A	A	A	A	A	A	G	A	G	A	A	R	G	G	R	A	A	A	G	G	G	R	G	A	A	A
chr1H|HvGBSv2-415_361506140+57	G/A	1	361506197	+	NA	NA	NA	NA	NA	NA	A	G	R	G	G	A	R	A	G	G	G	G	G	G	G	G	G	G	G	A	G	A	G	G	R	A	A	R	G	G	G	A	A	A	R	A	G	G	G
chr1H|HvGBSv2-415_361506140+123	A/G	1	361506263	+	NA	NA	NA	NA	NA	NA	A	A	A	A	A	A	R	A	A	A	A	A	A	A	A	A	A	A	A	G	A	A	A	A	A	A	A	R	A	A	A	A	A	A	A	A	A	A	A
chr1H|HvGBSv2-415_361506140+128	A/G	1	361506268	+	NA	NA	NA	NA	NA	NA	A	A	A	A	A	A	A	A	A	A	A	A	A	A	A	A	A	A	A	A	A	G	A	A	A	A	A	A	A	A	A	A	A	A	A	A	A	A	A
chr1H|HvGBSv2-5133_361607209+14	A/G	1	361607223	+	NA	NA	NA	NA	NA	NA	A	A	A	A	A	A	A	A	G	A	A	G	A	A	A	A	G	G	A	A	G	A	G	G	G	A	A	A	A	A	A	A	A	A	G	A	A	A	A
chr1H|HvGBSv2-5133_361607209+120	T/A	1	361607329	+	NA	NA	NA	NA	NA	NA	A	T	T	T	T	A	T	A	T	T	T	T	T	T	T	T	T	T	T	T	T	T	T	T	T	A	A	T	T	T	T	A	A	A	T	A	T	T	T
chr1H|HvGBSv2-5133_361607209+123	A/G	1	361607332	+	NA	NA	NA	NA	NA	NA	G	A	A	A	A	A	G	G	A	G	G	A	A	G	A	G	A	A	A	G	A	A	A	A	A	G	G	G	A	A	A	G	G	G	A	G	A	A	G
chr1H|HvGBSv2-416_362502485+88	C/G	1	362502573	+	NA	NA	NA	NA	NA	NA	G	C	C	C	C	G	C	G	C	C	C	C	C	C	C	C	C	C	C	C	C	C	C	C	C	G	G	C	C	C	C	G	G	G	C	G	C	C	C
chr1H|HvGBSv2-1080_362895071+5	T/C	1	362895076	+	NA	NA	NA	NA	NA	NA	C	T	T	T	T	C	T	C	T	T	T	T	T	T	T	T	T	T	T	T	T	T	T	T	T	C	C	T	T	T	T	C	C	C	T	C	T	T	T
chr1H|HvGBSv2-1080_362895071+17	T/A	1	362895088	+	NA	NA	NA	NA	NA	NA	A	T	T	T	T	A	T	A	T	T	T	T	T	T	T	T	T	T	T	T	T	T	T	T	T	A	A	T	T	T	T	A	A	A	T	A	T	T	T
chr1H|HvGBSv2-418_364496938+37	C/T	1	364496975	+	NA	NA	NA	NA	NA	NA	C	C	C	C	C	C	T	C	C	T	T	C	C	T	C	C	C	C	C	T	C	C	C	C	C	C	C	C	C	C	C	T	T	C	C	C	C	C	C
chr1H|HvGBSv2-6505_365007171+145	G/A	1	365007316	+	NA	NA	NA	NA	NA	NA	G	A	A	A	A	G	G	G	G	G	G	G	A	G	A	A	G	G	A	G	G	A	G	G	G	G	G	G	G	G	A	G	G	G	G	G	A	A	G
chr1H|HvGBSv2-419_365501125+3	A/G	1	365501128	+	NA	NA	NA	NA	NA	NA	A	A	A	A	A	A	G	A	A	G	G	A	A	G	A	A	A	A	A	G	A	A	A	A	A	A	A	A	A	A	A	G	G	A	A	A	A	A	A
chr1H|HvGBSv2-419_365501125+54	T/C	1	365501179	+	NA	NA	NA	NA	NA	NA	T	T	T	T	T	T	C	T	T	C	C	T	T	C	T	T	T	T	T	C	T	T	T	T	T	T	T	T	T	T	T	C	C	T	T	T	T	T	T
chr1H|HvGBSv2-419_365501125+69	G/A	1	365501194	+	NA	NA	NA	NA	NA	NA	G	G	G	G	G	G	A	G	G	A	A	G	G	A	G	G	G	G	G	A	G	G	G	G	G	G	G	G	G	G	G	A	A	G	G	G	G	G	G
chr1H|HvGBSv2-419_365501125+85	C/T	1	365501210	+	NA	NA	NA	NA	NA	NA	C	C	C	C	C	C	T	C	C	T	T	C	C	T	C	C	C	C	C	T	C	C	C	C	C	C	C	C	C	C	C	T	T	C	C	C	C	C	C
chr1H|HvGBSv2-419_365501125+130	A/G	1	365501255	+	NA	NA	NA	NA	NA	NA	A	G	G	G	G	G	A	A	A	A	A	A	G	A	G	G	A	A	G	A	A	G	A	A	A	G	G	A	A	A	G	A	A	A	A	A	G	G	A
chr1H|HvGBSv2-419_365501125+151	T/A	1	365501276	+	NA	NA	NA	NA	NA	NA	T	A	A	A	A	A	A	T	T	A	A	T	A	A	A	A	T	T	A	A	T	A	T	T	T	A	A	T	T	T	A	A	A	T	T	T	A	A	T
chr1H|HvGBSv2-6506_366001033+82	C/T	1	366001115	+	NA	NA	NA	NA	NA	NA	C	T	T	T	T	T	T	C	C	T	T	C	T	T	T	T	C	C	T	T	C	T	C	C	C	T	T	C	C	C	T	T	T	C	C	C	T	T	C
chr1H|HvGBSv2-6506_366001033+132	T/G	1	366001165	+	NA	NA	NA	NA	NA	NA	T	G	G	G	G	G	T	T	T	T	T	T	G	T	G	G	T	T	G	T	T	G	T	T	T	G	G	T	T	T	G	T	T	T	T	T	G	G	T
chr1H|HvGBSv2-6506_366001033+145	A/C	1	366001178	+	NA	NA	NA	NA	NA	NA	A	A	A	A	A	A	C	A	A	C	C	A	A	C	A	A	A	A	A	C	A	A	A	A	A	A	A	A	A	A	A	C	C	A	A	A	A	A	A
chr1H|HvGBSv2-6506_366001033+166	A/G	1	366001199	+	NA	NA	NA	NA	NA	NA	A	A	A	A	A	A	G	A	A	G	G	A	A	G	A	A	A	A	A	G	A	A	A	A	A	A	A	A	A	A	A	G	G	A	A	A	A	A	A
chr1H|HvGBSv2-10933_366302691+44	A/G	1	366302735	+	NA	NA	NA	NA	NA	NA	A	A	A	A	A	A	G	A	A	G	G	A	A	G	A	A	A	A	A	G	A	A	A	A	A	A	A	A	A	A	A	G	G	A	A	A	A	A	A
chr1H|HvGBSv2-6507_367009694+85	G/A	1	367009779	+	NA	NA	NA	NA	NA	NA	G	G	G	G	G	G	A	G	G	A	A	G	G	A	G	G	G	G	G	A	G	G	G	G	G	G	G	G	G	G	G	A	A	G	G	G	G	G	G
chr1H|HvGBSv2-6507_367009694+86	A/G	1	367009780	+	NA	NA	NA	NA	NA	NA	G	A	A	A	A	A	A	G	A	A	A	A	A	A	A	A	A	A	A	A	A	A	A	A	A	A	A	A	A	A	A	A	A	A	A	G	A	A	G
chr1H|HvGBSv2-421_367456131+73	T/G	1	367456204	+	NA	NA	NA	NA	NA	NA	T	T	T	T	T	T	G	T	T	G	G	T	T	G	T	T	T	T	T	G	T	T	T	T	T	T	T	T	T	T	T	G	G	T	T	T	T	T	T
chr1H|HvGBSv2-6508_368012454+99	A/G	1	368012553	+	NA	NA	NA	NA	NA	NA	A	A	A	A	A	A	G	A	A	G	G	A	A	G	A	A	A	A	A	G	A	A	A	A	A	A	A	A	A	A	A	G	G	A	A	A	A	A	A
chr1H|HvGBSv2-6508_368012454+180	T/G	1	368012634	+	NA	NA	NA	NA	NA	NA	T	T	T	T	T	T	G	T	T	G	G	T	T	G	T	T	T	T	T	G	T	T	T	T	T	T	T	T	T	T	T	G	G	T	T	T	T	T	T
chr1H|HvGBSv2-422_368485973+91	T/C	1	368486064	+	NA	NA	NA	NA	NA	NA	T	T	T	T	T	T	C	T	T	C	C	T	T	C	T	T	T	T	T	C	T	T	T	T	T	T	T	T	T	T	T	C	C	T	T	T	T	T	T
chr1H|HvGBSv2-422_368485973+99	C/G	1	368486072	+	NA	NA	NA	NA	NA	NA	C	C	C	C	C	C	G	C	C	G	G	C	C	G	C	C	C	C	C	G	C	C	C	C	C	C	C	C	C	C	C	G	G	C	C	C	C	C	C
chr1H|HvGBSv2-422_368485973+135	C/A	1	368486108	+	NA	NA	NA	NA	NA	NA	C	C	C	C	C	C	A	C	C	A	A	C	C	A	C	C	C	C	C	A	C	C	C	C	C	C	C	C	C	C	C	A	A	C	C	C	C	C	C
chr1H|HvGBSv2-6509_368964535+145	A/C	1	368964680	+	NA	NA	NA	NA	NA	NA	C	A	A	A	A	A	C	C	A	C	C	A	A	C	A	A	A	A	A	C	A	A	A	A	A	A	A	A	A	A	A	C	C	A	A	C	A	A	C
chr1H|HvGBSv2-6510_369996704+119	C/T	1	369996823	+	NA	NA	NA	NA	NA	NA	C	C	C	C	C	C	C	C	T	C	C	T	C	C	C	C	T	C	C	C	C	C	C	T	C	C	C	C	C	C	C	C	C	C	C	C	C	C	C
chr1H|HvGBSv2-6510_369996704+124	G/T	1	369996828	+	NA	NA	NA	NA	NA	NA	T	G	G	G	G	G	G	T	G	G	G	G	G	G	G	G	G	G	G	G	G	G	G	G	G	G	G	G	G	G	G	G	G	G	G	T	G	G	T
chr1H|HvGBSv2-7021_370081020+23	T/G	1	370081043	+	NA	NA	NA	NA	NA	NA	T	T	T	T	T	T	T	T	T	T	T	T	T	T	T	T	T	T	T	T	T	T	T	T	T	T	T	T	T	T	T	T	T	T	T	T	T	T	T
chr1H|HvGBSv2-6511_370974570+3	C/T	1	370974573	+	NA	NA	NA	NA	NA	NA	T	C	C	C	C	C	C	C	C	C	C	C	C	C	C	C	C	C	C	C	C	C	C	C	C	C	C	C	C	C	C	C	C	C	C	T	C	C	T
chr1H|HvGBSv2-6511_370974570+11	A/T	1	370974581	+	NA	NA	NA	NA	NA	NA	T	A	A	A	A	A	A	A	A	A	A	A	A	A	A	A	A	A	A	A	A	A	A	A	A	A	A	A	A	A	A	A	A	A	A	T	A	A	T
chr1H|HvGBSv2-6511_370974570+19	C/T	1	370974589	+	NA	NA	NA	NA	NA	NA	T	C	C	C	C	C	C	C	C	C	C	C	C	C	C	C	C	C	C	C	C	C	C	C	C	C	C	C	C	C	C	C	C	C	C	T	C	C	T
chr1H|HvGBSv2-6511_370974570+56	G/A	1	370974626	+	NA	NA	NA	NA	NA	NA	A	G	G	G	G	G	G	G	G	G	G	G	G	G	G	G	G	G	G	G	G	G	G	G	G	G	G	G	G	G	G	G	G	G	G	A	G	G	A
chr1H|HvGBSv2-6511_370974570+69	T/C	1	370974639	+	NA	NA	NA	NA	NA	NA	C	T	T	T	T	T	T	T	T	T	T	T	T	T	T	T	T	T	T	T	T	T	T	T	T	T	T	T	T	T	T	T	T	T	T	C	T	T	C
chr1H|HvGBSv2-6511_370974570+93	A/G	1	370974663	+	NA	NA	NA	NA	NA	NA	A	A	A	A	R	A	A	A	G	A	A	G	A	A	A	A	G	G	A	A	G	A	G	G	G	A	A	A	G	G	A	A	A	A	G	A	A	A	A
chr1H|HvGBSv2-6511_370974570+122	A/G	1	370974692	+	NA	NA	NA	NA	NA	NA	G	A	A	A	A	A	A	A	A	A	A	A	A	A	A	A	A	A	A	A	A	A	A	A	A	A	A	A	A	A	A	A	A	A	A	G	A	A	G
chr1H|HvGBSv2-1302_371409690+16	G/A	1	371409706	+	NA	NA	NA	NA	NA	NA	A	G	G	G	G	G	G	A	G	G	G	G	G	G	G	G	G	G	G	G	G	G	G	G	G	G	G	G	G	G	G	G	G	G	G	A	G	G	A
chr1H|HvGBSv2-1302_371409690+33	G/C	1	371409723	+	NA	NA	NA	NA	NA	NA	C	G	G	G	G	G	G	G	G	G	G	G	G	G	G	G	G	G	G	G	G	G	G	G	G	G	G	G	G	G	G	G	G	G	G	C	G	G	C
chr1H|HvGBSv2-1302_371409690+53	C/T	1	371409743	+	NA	NA	NA	NA	NA	NA	T	C	C	C	C	C	C	T	C	C	C	C	C	C	C	C	C	C	C	C	C	C	C	C	C	C	C	C	C	C	C	C	C	C	C	T	C	C	T
chr1H|HvGBSv2-1302_371409690+58	A/C	1	371409748	+	NA	NA	NA	NA	NA	NA	A	A	A	A	A	A	A	C	A	A	A	A	A	A	A	A	A	A	A	A	A	A	A	A	A	A	A	A	A	A	A	A	A	A	A	A	A	A	A
chr1H|HvGBSv2-1302_371409690+103	T/C	1	371409793	+	NA	NA	NA	NA	NA	NA	C	T	T	T	T	T	T	C	T	T	T	T	T	T	T	T	T	T	T	T	T	T	T	T	T	T	T	T	T	T	T	T	T	T	T	C	T	T	C
chr1H|HvGBSv2-1302_371409690+165	T/G	1	371409855	+	NA	NA	NA	NA	NA	NA	G	T	T	T	T	T	T	T	T	T	T	T	T	T	T	T	T	T	T	T	T	T	T	T	T	T	T	T	T	T	T	T	T	T	T	G	T	T	G
chr1H|HvGBSv2-425_371518697+15	G/A	1	371518712	+	NA	NA	NA	NA	NA	NA	A	G	G	G	G	G	G	G	G	G	G	G	G	G	G	G	G	G	G	G	G	G	G	G	G	G	G	G	G	G	G	G	G	G	G	A	G	G	A
chr1H|HvGBSv2-425_371518697+74	T/A	1	371518771	+	NA	NA	NA	NA	NA	NA	A	T	T	T	T	T	T	T	T	T	T	T	T	T	T	T	T	T	T	T	T	T	T	T	T	T	T	T	T	T	T	T	T	T	T	A	T	T	A
chr1H|HvGBSv2-425_371518697+79	C/T	1	371518776	+	NA	NA	NA	NA	NA	NA	C	C	C	C	C	C	C	C	C	C	C	C	C	C	C	C	C	C	C	C	C	C	C	C	C	C	C	C	C	C	C	C	C	C	C	C	C	C	C
chr1H|HvGBSv2-425_371518697+144	A/G	1	371518841	+	NA	NA	NA	NA	NA	NA	A	A	A	A	A	A	A	A	A	A	A	A	A	A	A	A	A	A	A	A	A	A	A	A	A	A	A	A	A	A	A	G	G	A	A	A	A	A	A
chr1H|HvGBSv2-425_371518697+156	G/T	1	371518853	+	NA	NA	NA	NA	NA	NA	G	G	G	G	G	G	G	G	G	G	G	G	G	G	G	G	G	G	G	G	G	G	G	G	G	G	G	G	G	G	G	G	G	G	G	G	G	G	G
chr1H|HvGBSv2-425_371518697+160	T/C	1	371518857	+	NA	NA	NA	NA	NA	NA	T	T	T	T	T	T	T	T	T	T	T	T	T	T	T	T	T	T	T	T	T	T	T	T	T	T	T	T	T	T	T	T	T	T	T	T	T	T	T
chr1H|HvGBSv2-426_372484698+89	A/G	1	372484787	+	NA	NA	NA	NA	NA	NA	G	A	A	A	A	A	A	G	A	A	A	A	A	A	A	A	A	A	A	A	A	A	A	A	A	A	A	A	A	A	A	A	A	A	A	G	A	A	G
chr1H|HvGBSv2-426_372484698+127	C/T	1	372484825	+	NA	NA	NA	NA	NA	NA	C	C	C	C	C	C	C	C	T	C	C	T	C	C	C	C	T	T	C	C	T	C	T	T	T	C	C	C	T	T	C	C	C	C	T	C	C	C	C
chr1H|HvGBSv2-6514_373998969+32	C/T	1	373999001	+	NA	NA	NA	NA	NA	NA	C	T	T	T	T	T	T	C	C	T	T	C	T	T	T	T	C	C	T	T	C	T	C	C	C	T	T	T	C	C	T	T	T	T	C	C	T	T	C
chr1H|HvGBSv2-6514_373998969+33	A/G	1	373999002	+	NA	NA	NA	NA	NA	NA	G	A	A	A	A	A	A	A	A	A	A	A	A	A	A	A	A	A	A	A	A	A	A	A	A	A	A	A	A	A	A	A	A	A	A	G	A	A	G
chr1H|HvGBSv2-6514_373998969+58	T/C	1	373999027	+	NA	NA	NA	NA	NA	NA	C	T	T	T	T	T	T	T	T	T	T	T	T	T	T	T	T	T	T	T	T	T	T	T	T	T	T	T	T	T	T	T	T	T	T	C	T	T	C
chr1H|HvGBSv2-6514_373998969+91	G/T	1	373999060	+	NA	NA	NA	NA	NA	NA	T	G	G	G	G	G	G	G	G	G	G	G	G	G	G	G	G	G	G	G	G	G	G	G	G	G	G	G	G	G	G	G	G	G	G	T	G	G	T
chr1H|HvGBSv2-3251_374267712+38	C/A	1	374267750	+	NA	NA	NA	NA	NA	NA	C	C	C	C	C	C	C	A	A	C	C	A	C	C	C	C	A	A	C	C	A	C	A	A	A	C	C	C	A	A	C	C	C	C	A	C	C	C	C
chr1H|HvGBSv2-3251_374267712+40	C/G	1	374267752	+	NA	NA	NA	NA	NA	NA	C	C	C	C	C	C	C	G	G	C	C	G	C	C	C	C	G	G	C	C	G	C	G	G	G	C	C	C	G	G	C	C	C	C	G	C	C	C	C
chr1H|HvGBSv2-428_374503008+31	G/T	1	374503039	+	NA	NA	NA	NA	NA	NA	G	G	G	G	G	G	G	G	G	G	G	G	G	G	G	G	G	G	G	G	G	G	G	G	G	G	G	G	G	G	G	G	G	G	G	G	G	G	G
chr1H|HvGBSv2-428_374503008+66	G/C	1	374503074	+	NA	NA	NA	NA	NA	NA	G	G	G	G	G	G	G	C	C	G	G	C	G	G	G	G	C	C	G	G	C	G	C	C	C	G	G	G	C	C	G	G	G	G	C	G	G	G	G
chr1H|HvGBSv2-428_374503008+111	C/T	1	374503119	+	NA	NA	NA	NA	NA	NA	C	T	C	C	T	C	C	C	C	C	C	C	C	C	C	C	C	C	T	C	C	C	C	C	C	C	C	C	C	C	C	C	C	C	C	C	C	C	C
chr1H|HvGBSv2-6515_375075088+26	G/A	1	375075114	+	NA	NA	NA	NA	NA	NA	G	G	G	G	G	G	G	G	G	G	G	G	G	G	G	G	G	G	G	G	G	G	G	G	G	G	G	G	G	G	G	G	G	G	G	G	G	G	G
chr1H|HvGBSv2-6515_375075088+38	T/C	1	375075126	+	NA	NA	NA	NA	NA	NA	T	T	T	T	T	T	T	C	C	T	T	C	T	T	T	T	C	C	T	T	C	T	C	C	C	T	T	T	C	C	T	T	T	T	C	T	T	T	T
chr1H|HvGBSv2-6516_375976028+72	G/A	1	375976100	+	NA	NA	NA	NA	NA	NA	G	G	G	G	G	G	G	A	A	G	G	A	G	G	G	G	A	A	G	G	A	G	A	A	A	G	G	A	A	A	G	G	G	G	A	G	G	G	G
chr1H|HvGBSv2-6516_375976028+151	G/A	1	375976179	+	NA	NA	NA	NA	NA	NA	G	G	G	G	G	G	G	A	A	G	G	A	G	G	G	G	A	A	G	G	A	G	A	A	A	G	G	A	A	A	G	G	G	G	A	G	G	G	G
chr1H|HvGBSv2-4292_376358333+43	A/G	1	376358376	+	NA	NA	NA	NA	NA	NA	A	A	A	A	A	A	A	G	G	A	A	G	A	A	A	A	G	G	A	A	G	A	G	G	G	A	A	A	G	G	A	A	A	A	G	A	A	A	A
chr1H|HvGBSv2-4292_376358333+124	C/A	1	376358457	+	NA	NA	NA	NA	NA	NA	C	C	C	C	C	C	C	A	A	C	C	A	C	C	C	C	A	A	C	C	A	C	A	A	A	C	C	C	A	A	C	C	C	C	A	C	C	C	C
chr1H|HvGBSv2-4292_376358333+125	T/A	1	376358458	+	NA	NA	NA	NA	NA	NA	T	T	T	T	T	T	T	A	A	T	T	A	T	T	T	T	A	A	T	T	A	T	A	A	A	T	T	T	A	A	T	T	T	T	A	T	T	T	T
chr1H|HvGBSv2-4292_376358333+139	A/G	1	376358472	+	NA	NA	NA	NA	NA	NA	A	A	A	A	A	A	A	G	G	A	A	G	A	A	A	A	G	G	A	A	G	A	G	G	G	A	A	A	G	G	A	A	A	A	G	A	A	A	A
chr1H|HvGBSv2-430_376377144+16	T/C	1	376377160	+	NA	NA	NA	NA	NA	NA	T	T	T	T	T	T	T	C	C	T	T	C	T	T	T	T	C	C	T	T	C	T	C	C	C	T	T	T	C	C	T	T	T	T	C	T	T	T	T
chr1H|HvGBSv2-6517_377007767+56	G/C	1	377007823	+	NA	NA	NA	NA	NA	NA	G	C	C	C	C	C	C	G	G	C	C	G	C	C	C	C	G	G	C	C	G	C	G	G	G	C	C	C	G	G	C	C	C	C	G	G	C	C	G
chr1H|HvGBSv2-6517_377007767+57	A/G	1	377007824	+	NA	NA	NA	NA	NA	NA	A	A	A	A	A	A	A	G	G	A	A	G	A	A	A	A	G	G	A	A	G	A	G	G	G	A	A	A	G	G	A	A	A	A	G	A	A	A	A
chr1H|HvGBSv2-6517_377007767+66	A/C	1	377007833	+	NA	NA	NA	NA	NA	NA	A	A	A	A	A	A	A	C	C	A	A	C	A	A	A	A	C	C	A	A	C	A	C	C	C	A	A	A	C	C	A	A	A	A	C	A	A	A	A
chr1H|HvGBSv2-6517_377007767+117	C/T	1	377007884	+	NA	NA	NA	NA	NA	NA	C	C	C	C	C	C	C	C	T	C	C	T	C	C	C	C	T	T	C	C	T	C	T	T	T	C	C	C	T	T	C	C	C	C	T	C	C	C	C
chr1H|HvGBSv2-6517_377007767+123	T/G	1	377007890	+	NA	NA	NA	NA	NA	NA	T	T	T	T	T	T	T	G	G	T	T	G	T	T	T	T	G	G	T	T	G	T	G	G	G	T	T	T	G	G	T	T	T	T	G	T	T	T	T
chr1H|HvGBSv2-431_377585283+100	A/T	1	377585383	+	NA	NA	NA	NA	NA	NA	A	T	T	T	T	A	T	A	A	T	T	A	T	T	T	T	A	A	T	T	A	A	A	A	A	A	A	T	A	A	A	T	T	A	A	A	T	A	T
chr1H|HvGBSv2-6518_377982613+76	G/A	1	377982689	+	NA	NA	NA	NA	NA	NA	G	A	A	A	A	G	A	G	G	A	A	G	A	A	A	A	G	G	A	A	G	G	G	G	G	G	G	A	G	G	G	A	A	G	G	G	A	G	A
chr1H|HvGBSv2-6518_377982613+79	T/G	1	377982692	+	NA	NA	NA	NA	NA	NA	T	G	G	G	G	T	G	T	T	G	G	T	G	G	G	G	T	T	G	G	T	T	T	T	T	T	T	G	T	T	T	G	G	T	T	T	G	T	G
chr1H|HvGBSv2-6518_377982613+85	C/G	1	377982698	+	NA	NA	NA	NA	NA	NA	C	C	C	C	C	C	C	C	C	C	C	C	C	C	C	C	C	C	C	C	C	C	C	C	C	C	C	G	C	C	C	C	C	C	C	C	C	C	C
chr1H|HvGBSv2-432_378494845+141	T/C	1	378494986	+	NA	NA	NA	NA	NA	NA	T	C	C	C	C	T	C	T	T	C	C	T	C	C	C	C	T	T	C	C	T	C	T	T	T	T	T	T	T	T	T	C	C	T	T	T	C	T	C
chr1H|HvGBSv2-6519_378999433+88	C/G	1	378999521	+	NA	NA	NA	NA	NA	NA	C	C	G	G	G	C	G	C	C	G	G	C	G	G	G	C	C	C	G	G	C	G	C	C	C	C	C	C	C	C	C	G	G	C	C	C	G	C	G
chr1H|HvGBSv2-6519_378999433+134	T/A	1	378999567	+	NA	NA	NA	NA	NA	NA	T	T	A	A	A	T	A	T	T	A	A	T	A	A	A	T	T	T	A	A	T	A	T	T	T	T	T	T	T	T	T	A	A	T	T	T	A	T	A
chr1H|HvGBSv2-433_379650777+29	C/A	1	379650806	+	NA	NA	NA	NA	NA	NA	C	C	A	A	C	C	A	C	C	A	A	C	A	A	C	C	C	C	C	A	C	A	C	C	C	C	C	C	C	C	C	A	A	C	C	C	A	C	C
chr1H|HvGBSv2-433_379650777+81	T/C	1	379650858	+	NA	NA	NA	NA	NA	NA	T	T	C	C	T	T	C	T	T	C	C	T	C	C	T	T	T	T	T	C	T	C	T	T	T	T	T	T	T	T	T	C	C	T	T	T	C	T	T
chr1H|HvGBSv2-433_379650777+109	G/C	1	379650886	+	NA	NA	NA	NA	NA	NA	G	G	C	C	G	G	C	G	G	C	C	G	C	C	G	G	G	G	G	C	G	C	G	G	G	G	G	G	G	G	G	C	C	G	G	G	C	G	G
chr1H|HvGBSv2-433_379650777+141	C/T	1	379650918	+	NA	NA	NA	NA	NA	NA	C	C	T	T	C	C	T	C	C	T	T	C	T	T	C	C	C	C	C	T	C	T	C	C	C	C	C	C	C	C	C	T	T	C	C	C	T	C	C
chr1H|HvGBSv2-434_380512322+63	T/C	1	380512385	+	NA	NA	NA	NA	NA	NA	T	T	T	T	T	T	T	T	T	T	T	T	T	T	T	T	T	T	T	T	T	T	T	T	T	T	T	T	T	T	T	T	T	T	T	T	T	T	T
chr1H|HvGBSv2-434_380512322+87	A/G	1	380512409	+	NA	NA	NA	NA	NA	NA	A	A	A	A	A	A	A	A	A	A	A	A	A	A	A	A	A	A	A	A	A	A	A	A	A	A	A	A	A	A	A	A	A	A	A	A	A	A	A
chr1H|HvGBSv2-434_380512322+107	G/A	1	380512429	+	NA	NA	NA	NA	NA	NA	G	G	G	G	G	G	G	G	G	G	G	G	G	G	G	G	G	G	G	G	G	G	G	G	G	G	G	G	G	G	G	G	G	G	G	G	G	G	G
chr1H|HvGBSv2-434_380512322+115	A/T	1	380512437	+	NA	NA	NA	NA	NA	NA	A	A	A	A	A	A	A	A	A	A	A	A	A	A	A	A	A	A	A	A	A	A	A	A	A	A	A	A	A	A	A	A	A	A	A	A	A	A	A
chr1H|HvGBSv2-6521_380928616+34	C/G	1	380928650	+	NA	NA	NA	NA	NA	NA	C	C	C	C	C	C	C	C	G	C	C	G	C	C	C	C	G	G	C	C	G	C	G	G	G	C	C	C	G	G	C	C	C	C	G	C	G	C	C
chr1H|HvGBSv2-435_381505447+15	C/T	1	381505462	+	NA	NA	NA	NA	NA	NA	T	T	C	C	T	T	C	C	C	C	C	C	C	C	C	C	C	C	T	C	C	C	C	C	C	C	T	T	C	C	C	C	C	C	C	T	C	C	C
chr1H|HvGBSv2-435_381505447+164	C/T	1	381505611	+	NA	NA	NA	NA	NA	NA	C	C	C	C	C	C	C	C	T	C	C	T	C	C	C	C	T	T	C	C	T	C	T	T	T	C	C	C	T	T	C	C	C	C	T	C	T	C	C
chr1H|HvGBSv2-6522_381997895+151	C/T	1	381998046	+	NA	NA	NA	NA	NA	NA	C	C	C	C	C	C	C	C	T	C	C	T	C	C	C	C	T	T	C	C	T	C	T	T	T	C	C	C	T	T	C	C	C	C	T	C	T	C	C
chr1H|HvGBSv2-436_382510976+117	A/G	1	382511093	+	NA	NA	NA	NA	NA	NA	A	A	A	A	A	A	A	A	G	A	A	G	A	A	A	A	G	G	A	A	G	A	G	G	G	A	A	A	G	G	A	A	A	A	G	A	G	A	A
chr1H|HvGBSv2-436_382510976+160	T/C	1	382511136	+	NA	NA	NA	NA	NA	NA	T	T	T	T	T	T	T	T	C	T	T	C	T	T	T	T	C	C	T	T	C	T	C	C	C	T	T	T	C	C	T	T	T	T	C	T	C	T	T
chr1H|HvGBSv2-6523_383207454+65	C/A	1	383207519	+	NA	NA	NA	NA	NA	NA	C	C	C	C	C	C	C	C	A	C	C	A	C	C	C	C	A	A	C	C	A	C	A	A	A	C	C	C	A	A	C	C	C	C	A	C	A	C	C
chr1H|HvGBSv2-437_383498435+29	C/T	1	383498464	+	NA	NA	NA	NA	NA	NA	C	C	C	C	C	C	C	C	T	C	C	T	C	C	C	C	T	T	C	C	T	C	T	T	T	C	C	C	T	T	C	C	C	C	T	C	T	C	C
chr1H|HvGBSv2-437_383498435+132	G/A	1	383498567	+	NA	NA	NA	NA	NA	NA	G	G	G	G	G	G	G	G	A	G	G	A	G	G	G	G	A	A	G	G	A	G	A	A	A	G	G	G	A	A	G	G	G	G	A	G	A	G	G
chr1H|HvGBSv2-3016_383783242+186	T/G	1	383783428	+	NA	NA	NA	NA	NA	NA	T	T	T	T	T	T	T	T	G	T	T	G	T	T	T	T	G	G	T	T	G	T	G	G	G	T	T	T	G	G	T	T	T	T	G	T	G	T	T
chr1H|HvGBSv2-6524_384001839+103	G/C	1	384001942	+	NA	NA	NA	NA	NA	NA	G	G	G	G	G	G	C	C	G	C	C	G	C	C	C	C	G	G	G	C	G	G	G	G	G	G	G	G	G	G	C	C	C	C	G	G	G	G	G
chr1H|HvGBSv2-438_384481603+27	T/C	1	384481630	+	NA	NA	NA	NA	NA	NA	T	T	T	T	T	T	T	T	C	T	T	C	T	T	T	T	C	C	T	T	C	T	C	C	C	T	T	T	C	C	T	T	T	T	C	T	C	T	T
chr1H|HvGBSv2-438_384481603+90	G/T	1	384481693	+	NA	NA	NA	NA	NA	NA	G	G	G	G	G	G	G	G	T	G	G	T	G	G	G	G	T	T	G	G	T	G	T	T	T	G	G	G	T	T	G	G	G	G	T	G	T	G	G
chr1H|HvGBSv2-438_384481603+123	G/A	1	384481726	+	NA	NA	NA	NA	NA	NA	G	G	G	G	G	G	G	G	A	G	G	A	G	G	G	G	A	A	G	G	A	G	A	A	A	G	G	G	A	A	G	G	G	G	A	G	A	G	G
chr1H|HvGBSv2-439_385480809+67	T/C	1	385480876	+	NA	NA	NA	NA	NA	NA	T	T	T	T	T	T	C	C	T	C	C	T	C	C	C	C	T	T	T	C	T	T	T	T	T	T	T	T	T	T	T	C	C	C	T	T	T	T	T
chr1H|HvGBSv2-439_385480809+90	T/C	1	385480899	+	NA	NA	NA	NA	NA	NA	T	T	T	T	T	T	C	C	T	C	C	T	C	C	C	C	T	T	T	C	T	T	T	T	T	T	T	T	T	T	T	C	C	C	T	T	T	T	T
chr1H|HvGBSv2-6526_386004524+86	T/C	1	386004610	+	NA	NA	NA	NA	NA	NA	C	C	C	C	C	C	C	T	T	C	C	T	T	C	T	T	T	T	C	C	T	C	T	T	T	C	C	C	T	T	C	C	C	T	T	C	T	C	C
chr1H|HvGBSv2-6526_386004524+94	G/A	1	386004618	+	NA	NA	NA	NA	NA	NA	A	A	A	A	A	A	A	G	G	A	A	G	G	A	G	G	G	G	A	A	G	A	G	G	G	A	A	A	G	G	A	A	A	G	G	A	G	A	A
chr1H|HvGBSv2-440_386513958+92	C/A	1	386514050	+	NA	NA	NA	NA	NA	NA	A	A	A	A	A	A	A	C	C	A	A	C	C	A	C	C	C	C	A	A	C	A	C	C	C	A	A	A	C	C	A	A	A	C	C	A	A	A	A
chr1H|HvGBSv2-440_386513958+105	G/T	1	386514063	+	NA	NA	NA	NA	NA	NA	G	G	G	G	G	G	G	G	G	G	G	G	G	G	G	G	G	G	G	G	G	G	G	G	G	G	G	G	G	G	G	G	G	G	G	G	G	G	G
chr1H|HvGBSv2-440_386513958+121	T/G	1	386514079	+	NA	NA	NA	NA	NA	NA	T	T	T	T	T	T	T	T	T	T	T	T	T	T	T	T	T	T	T	T	T	T	T	T	T	T	T	T	T	T	T	T	T	T	T	T	T	T	T
chr1H|HvGBSv2-6527_387008407+37	A/T	1	387008444	+	NA	NA	NA	NA	NA	NA	A	A	A	A	A	A	A	T	A	A	A	A	A	A	A	A	A	A	A	A	A	A	A	A	A	A	A	A	A	A	A	A	A	T	A	A	A	A	A
chr1H|HvGBSv2-6527_387008407+80	A/T	1	387008487	+	NA	NA	NA	NA	NA	NA	A	A	A	A	A	A	A	A	T	A	A	T	A	A	A	A	T	T	A	A	T	A	T	T	T	A	A	A	T	T	A	A	A	A	T	A	A	A	A
chr1H|HvGBSv2-441_387530312+60	T/C	1	387530372	+	NA	NA	NA	NA	NA	NA	T	T	T	T	T	T	T	C	T	T	T	T	T	T	T	T	T	T	T	T	T	T	T	T	T	T	T	T	T	T	T	T	T	T	T	T	T	T	T
chr1H|HvGBSv2-441_387530312+82	T/G	1	387530394	+	NA	NA	NA	NA	NA	NA	T	T	T	T	T	T	T	T	T	T	T	T	T	T	T	T	G	T	T	T	T	T	T	G	T	T	T	T	T	T	T	T	T	T	T	T	T	T	T
chr1H|HvGBSv2-441_387530312+149	C/T	1	387530461	+	NA	NA	NA	NA	NA	NA	C	C	C	C	C	C	C	T	C	C	C	C	C	C	T	C	C	C	C	C	C	T	C	C	C	C	C	C	C	C	C	C	C	T	C	C	C	C	C
chr1H|HvGBSv2-441_387530312+171	A/C	1	387530483	+	NA	NA	NA	NA	NA	NA	A	A	A	A	A	A	A	A	A	A	A	A	A	A	A	A	A	A	A	A	A	A	A	A	A	A	A	A	A	A	A	A	A	A	A	A	A	A	A
chr1H|HvGBSv2-6528_388103021+45	G/A	1	388103066	+	NA	NA	NA	NA	NA	NA	G	G	G	G	G	G	G	A	G	G	G	G	G	G	G	G	G	G	G	G	G	A	G	G	G	G	G	G	G	G	G	G	G	A	G	G	G	G	G
chr1H|HvGBSv2-6528_388103021+49	C/T	1	388103070	+	NA	NA	NA	NA	NA	NA	C	C	C	C	C	C	C	C	T	C	C	T	C	C	C	C	T	T	C	C	T	C	T	T	T	C	C	C	T	T	C	C	C	C	T	C	C	C	C
chr1H|HvGBSv2-6528_388103021+55	T/C	1	388103076	+	NA	NA	NA	NA	NA	NA	T	T	T	T	T	T	T	C	T	T	T	T	T	T	T	T	T	T	T	T	T	C	T	T	T	T	T	T	T	T	T	T	T	C	T	T	T	T	T
chr1H|HvGBSv2-6528_388103021+146	C/A	1	388103167	+	NA	NA	NA	NA	NA	NA	C	C	C	C	C	C	C	A	C	C	C	C	C	C	C	C	C	C	C	C	C	A	C	C	C	C	C	C	C	C	C	C	C	A	C	C	C	C	C
chr1H|HvGBSv2-442_388479144+17	T/A	1	388479161	+	NA	NA	NA	NA	NA	NA	T	T	T	T	T	T	T	T	T	T	T	T	T	T	T	T	T	T	T	T	T	T	T	T	T	T	T	T	T	T	T	A	A	T	T	T	T	T	T
chr1H|HvGBSv2-442_388479144+18	A/T	1	388479162	+	NA	NA	NA	NA	NA	NA	T	A	A	A	A	A	A	T	A	A	A	A	A	A	T	T	A	A	A	A	A	T	A	A	A	A	A	A	A	A	A	A	A	T	A	A	A	A	A
chr1H|HvGBSv2-442_388479144+19	A/T	1	388479163	+	NA	NA	NA	NA	NA	NA	A	A	A	A	A	A	A	A	A	A	A	A	A	A	A	A	A	A	A	A	A	T	A	A	A	A	A	A	A	A	A	A	A	A	A	A	A	A	A
chr1H|HvGBSv2-442_388479144+149	T/C	1	388479293	+	NA	NA	NA	NA	NA	NA	C	T	T	T	T	T	T	C	T	T	T	T	T	T	C	C	T	T	T	T	T	C	T	T	T	T	T	T	T	T	T	T	T	C	T	T	T	T	T
chr1H|HvGBSv2-443_389482482+20	G/A	1	389482502	+	NA	NA	NA	NA	NA	NA	A	G	G	G	G	G	G	G	G	G	G	G	G	G	A	G	G	G	G	G	G	A	G	G	G	G	G	G	G	G	G	G	G	G	G	G	G	G	G
chr1H|HvGBSv2-443_389482482+46	T/C	1	389482528	+	NA	NA	NA	NA	NA	NA	T	T	T	T	T	T	T	T	T	T	T	T	T	T	T	T	T	T	T	T	T	C	T	T	T	T	T	T	T	T	T	T	T	T	T	T	T	T	T
chr1H|HvGBSv2-443_389482482+66	T/A	1	389482548	+	NA	NA	NA	NA	NA	NA	A	T	T	T	T	T	T	A	T	T	T	T	T	T	A	T	T	T	T	T	T	A	T	T	T	T	T	T	T	T	T	T	T	A	T	T	T	T	T
chr1H|HvGBSv2-443_389482482+119	A/G	1	389482601	+	NA	NA	NA	NA	NA	NA	G	A	A	A	A	A	A	G	A	A	A	A	A	A	G	A	A	A	A	A	A	G	A	A	A	A	A	A	A	A	A	A	A	G	A	A	A	A	A
chr1H|HvGBSv2-443_389482482+158	G/A	1	389482640	+	NA	NA	NA	NA	NA	NA	G	G	G	G	G	G	G	G	A	G	G	A	G	G	G	G	A	A	G	G	A	G	A	A	A	G	G	G	A	A	G	G	G	G	A	G	G	G	G
chr1H|HvGBSv2-6531_390440053+58	G/C	1	390440111	+	NA	NA	NA	NA	NA	NA	G	G	G	G	G	G	G	C	G	G	G	G	G	G	G	G	G	G	G	G	G	G	G	G	G	G	G	G	G	G	G	G	G	C	G	G	G	G	G
chr1H|HvGBSv2-6531_390440053+72	A/G	1	390440125	+	NA	NA	NA	NA	NA	NA	A	A	A	A	A	A	A	G	A	A	A	A	A	A	A	A	A	A	A	A	A	A	A	A	A	A	A	A	A	A	A	A	A	G	A	A	A	A	A
chr1H|HvGBSv2-6531_390440053+88	T/C	1	390440141	+	NA	NA	NA	NA	NA	NA	T	T	T	T	T	T	T	T	C	T	T	C	T	T	T	T	C	C	T	T	C	T	C	C	C	T	T	T	C	C	T	T	T	T	C	T	T	T	T
chr1H|HvGBSv2-445_390692798+119	T/C	1	390692917	+	NA	NA	NA	NA	NA	NA	T	T	T	T	T	T	T	C	T	T	T	T	T	T	T	T	T	T	T	T	T	T	T	T	T	T	T	T	T	T	T	T	T	C	T	T	T	T	T
chr1H|HvGBSv2-6532_390802080+81	A/G	1	390802161	+	NA	NA	NA	NA	NA	NA	A	A	A	A	A	A	A	A	G	A	A	G	A	A	A	A	G	G	A	A	G	A	G	G	G	A	A	A	G	G	A	A	A	A	G	A	A	A	A
chr1H|HvGBSv2-6532_390802080+163	G/T	1	390802243	+	NA	NA	NA	NA	NA	NA	G	G	G	G	G	G	G	T	G	G	G	G	G	G	G	G	G	G	G	G	G	G	G	G	G	G	G	G	G	G	G	G	G	T	G	G	G	G	G
chr1H|HvGBSv2-447_391570196+6	A/G	1	391570202	+	NA	NA	NA	NA	NA	NA	G	A	A	A	A	A	A	G	A	A	A	A	A	A	G	A	A	A	A	A	A	G	A	A	A	A	A	A	A	A	G	A	A	G	A	A	A	A	G
chr1H|HvGBSv2-447_391570196+62	T/A	1	391570258	+	NA	NA	NA	NA	NA	NA	A	T	T	T	T	T	T	A	T	T	T	T	T	T	A	T	T	T	T	T	T	A	T	T	T	T	T	T	T	T	A	T	T	A	T	T	T	T	A
chr1H|HvGBSv2-447_391570196+68	T/C	1	391570264	+	NA	NA	NA	NA	NA	NA	T	T	T	T	T	T	T	T	T	T	T	C	T	T	T	T	C	T	T	T	T	T	T	C	T	T	T	T	T	T	T	T	T	T	T	T	T	T	T
chr1H|HvGBSv2-447_391570196+69	G/A	1	391570265	+	NA	NA	NA	NA	NA	NA	A	G	G	G	G	G	G	A	G	G	G	G	G	G	A	G	G	G	G	G	G	A	G	G	G	G	G	G	G	G	A	G	G	A	G	G	G	G	A
chr1H|HvGBSv2-447_391570196+102	A/G	1	391570298	+	NA	NA	NA	NA	NA	NA	G	A	A	A	A	A	A	G	A	A	A	A	A	A	G	A	A	A	A	A	A	G	A	A	A	A	A	A	A	A	G	A	A	G	A	A	A	A	G
chr1H|HvGBSv2-447_391570196+107	G/A	1	391570303	+	NA	NA	NA	NA	NA	NA	G	G	G	G	G	G	G	A	G	G	G	G	G	G	G	G	G	G	G	G	G	G	G	G	G	G	G	G	G	G	G	G	G	A	G	G	G	G	G
chr1H|HvGBSv2-447_391570196+129	A/G	1	391570325	+	NA	NA	NA	NA	NA	NA	A	A	A	A	G	A	A	A	A	A	A	A	A	A	A	A	A	A	G	A	A	A	A	A	A	A	A	A	A	A	A	A	A	A	A	A	A	A	A
chr1H|HvGBSv2-447_391570196+136	C/T	1	391570332	+	NA	NA	NA	NA	NA	NA	T	C	C	C	C	C	C	T	C	C	C	C	C	C	T	C	C	C	C	C	C	T	C	C	C	C	C	C	C	C	T	C	C	T	C	C	C	C	T
chr1H|HvGBSv2-448_392005557+70	T/C	1	392005627	+	NA	NA	NA	NA	NA	NA	C	T	T	T	T	T	T	T	T	T	T	T	C	T	C	T	T	T	T	T	T	C	T	T	T	T	T	T	T	T	C	T	T	T	T	T	T	T	C
chr1H|HvGBSv2-6536_392633093+76	G/A	1	392633169	+	NA	NA	NA	NA	NA	NA	A	G	G	G	G	G	G	G	G	G	G	G	A	G	A	G	G	G	G	G	G	A	G	G	G	G	G	G	G	G	A	G	G	G	G	G	G	G	A
chr1H|HvGBSv2-6536_392633093+115	A/G	1	392633208	+	NA	NA	NA	NA	NA	NA	A	G	A	A	G	A	A	A	A	A	A	A	A	A	A	A	A	A	G	A	A	A	A	A	A	A	A	G	A	A	A	G	G	A	A	G	A	A	A
chr1H|HvGBSv2-6536_392633093+154	A/C	1	392633247	+	NA	NA	NA	NA	NA	NA	A	A	A	A	A	A	A	A	C	A	A	C	A	A	A	A	C	C	A	A	C	A	C	C	C	A	A	A	C	C	A	A	A	A	C	A	A	A	A
chr1H|HvGBSv2-5336_392641451+24	T/C	1	392641475	+	NA	NA	NA	NA	NA	NA	T	T	T	T	T	T	T	Y	T	T	T	T	T	T	T	T	T	T	T	T	T	T	T	T	T	T	T	T	T	T	T	T	T	Y	T	T	T	T	T
chr1H|HvGBSv2-5336_392641451+25	A/G	1	392641476	+	NA	NA	NA	NA	NA	NA	G	A	A	A	A	A	A	A	A	A	A	A	R	A	G	A	A	A	A	A	A	R	A	A	A	A	A	A	A	A	G	A	A	A	A	A	A	A	A
chr1H|HvGBSv2-6537_393177751+20	G/A	1	393177771	+	NA	NA	NA	NA	NA	NA	A	G	G	G	G	G	G	A	G	G	G	G	A	G	A	G	G	G	G	G	G	A	G	G	G	G	G	A	G	G	A	G	G	A	G	G	G	G	A
chr1H|HvGBSv2-450_393372402+29	C/T	1	393372431	+	NA	NA	NA	NA	NA	NA	T	T	C	C	T	C	C	T	C	C	C	C	T	C	T	T	C	C	T	C	C	T	T	C	C	C	C	T	C	C	T	T	T	T	C	T	C	C	T
chr1H|HvGBSv2-450_393372402+65	G/A	1	393372467	+	NA	NA	NA	NA	NA	NA	A	G	G	G	G	G	G	A	G	G	G	G	A	G	A	G	G	G	G	G	G	A	G	G	G	G	G	A	G	G	A	G	G	A	G	G	G	G	A
chr1H|HvGBSv2-450_393372402+103	C/T	1	393372505	+	NA	NA	NA	NA	NA	NA	C	C	C	C	C	C	C	T	C	C	C	C	C	C	C	C	C	C	C	C	C	C	C	C	C	C	C	C	C	C	C	C	C	T	C	C	C	C	C
chr1H|HvGBSv2-450_393372402+140	C/T	1	393372542	+	NA	NA	NA	NA	NA	NA	T	C	C	C	C	C	C	T	C	C	C	C	T	C	T	C	C	C	C	C	C	T	C	C	C	C	C	T	C	C	T	C	C	T	C	C	C	C	T
chr1H|HvGBSv2-451_393890323+49	C/T	1	393890372	+	NA	NA	NA	NA	NA	NA	T	C	C	C	C	C	C	C	C	C	C	C	C	C	T	C	C	C	C	C	C	T	C	C	C	C	C	C	C	C	T	C	C	C	C	C	C	C	T
chr1H|HvGBSv2-451_393890323+57	C/G	1	393890380	+	NA	NA	NA	NA	NA	NA	G	C	C	C	C	C	C	C	C	C	C	C	C	C	G	C	C	C	C	C	C	G	C	C	C	C	C	C	C	C	G	C	C	C	C	C	C	C	G
chr1H|HvGBSv2-451_393890323+93	C/T	1	393890416	+	NA	NA	NA	NA	NA	NA	T	C	C	C	C	C	C	C	C	C	C	C	C	C	T	C	C	C	C	C	C	T	C	C	C	C	C	C	C	C	T	C	C	C	C	C	C	C	T
chr1H|HvGBSv2-451_393890323+146	T/C	1	393890469	+	NA	NA	NA	NA	NA	NA	C	T	T	T	T	T	T	T	T	T	T	T	T	T	C	T	T	T	T	T	T	C	T	T	T	T	T	T	T	T	C	T	T	T	T	T	T	T	C
chr1H|HvGBSv2-451_393890323+182	C/G	1	393890505	+	NA	NA	NA	NA	NA	NA	G	C	C	C	C	C	C	C	C	C	C	C	C	C	G	C	C	C	C	C	C	G	C	C	C	C	C	C	C	C	G	C	C	C	C	C	C	C	G
chr1H|HvGBSv2-453_394728475+39	C/T	1	394728514	+	NA	NA	NA	NA	NA	NA	T	T	C	C	T	C	C	T	C	C	C	C	T	C	T	C	C	C	T	C	C	C	C	C	C	C	C	C	C	C	C	T	T	C	C	T	C	C	T
chr1H|HvGBSv2-453_394728475+73	G/A	1	394728548	+	NA	NA	NA	NA	NA	NA	A	A	G	G	A	G	G	A	G	G	G	G	A	G	A	G	G	G	A	G	G	A	G	G	G	G	G	G	G	G	G	A	A	A	G	A	G	G	A
chr1H|HvGBSv2-6542_395395431+9	A/G	1	395395440	+	NA	NA	NA	NA	NA	NA	G	G	G	G	G	A	A	G	A	A	A	A	G	A	G	A	A	A	G	A	A	G	A	A	A	A	A	A	A	A	A	G	G	G	A	G	G	A	G
chr1H|HvGBSv2-6542_395395431+36	T/C	1	395395467	+	NA	NA	NA	NA	NA	NA	T	C	T	T	T	T	T	T	T	T	T	T	T	T	T	T	T	T	T	T	T	T	T	T	T	T	T	T	T	T	T	T	T	C	T	T	T	T	T
chr1H|HvGBSv2-6542_395395431+70	G/A	1	395395501	+	NA	NA	NA	NA	NA	NA	G	A	G	G	G	G	G	G	G	G	G	G	G	G	G	G	G	G	G	G	G	G	G	G	G	G	G	G	G	G	G	G	G	A	G	G	G	G	G
chr1H|HvGBSv2-6542_395395431+109	C/A	1	395395540	+	NA	NA	NA	NA	NA	NA	A	A	A	A	A	C	C	A	C	C	C	C	A	C	A	C	C	C	A	C	C	A	C	C	C	C	C	C	C	C	C	A	A	A	C	A	A	C	A
chr1H|HvGBSv2-6542_395395431+126	C/A	1	395395557	+	NA	NA	NA	NA	NA	NA	C	A	C	C	C	C	C	C	C	C	C	C	C	C	C	C	C	C	C	C	C	C	C	C	C	C	C	C	C	C	C	C	C	A	C	C	C	C	C
chr1H|HvGBSv2-6543_395848095+43	A/T	1	395848138	+	NA	NA	NA	NA	NA	NA	A	T	A	A	A	A	A	A	A	A	A	A	A	A	A	A	A	A	A	A	A	T	A	A	A	A	A	A	A	A	A	A	A	A	A	A	A	A	A
chr1H|HvGBSv2-6543_395848095+66	C/T	1	395848161	+	NA	NA	NA	NA	NA	NA	C	T	C	C	C	C	C	C	C	C	C	C	C	C	C	C	C	C	C	C	C	T	C	C	C	C	C	C	C	C	C	C	C	C	C	C	C	C	C
chr1H|HvGBSv2-6543_395848095+68	A/G	1	395848163	+	NA	NA	NA	NA	NA	NA	G	G	G	G	G	A	A	G	A	A	A	A	G	A	G	A	A	A	G	A	A	G	A	A	A	A	A	A	A	A	A	G	G	G	A	G	G	A	G
chr1H|HvGBSv2-456_396073934+54	G/T	1	396073988	+	NA	NA	NA	NA	NA	NA	T	T	T	T	T	G	G	T	G	G	G	G	T	G	T	G	G	G	T	G	G	T	G	G	G	G	G	G	G	G	G	T	T	T	G	T	T	G	T
chr1H|HvGBSv2-456_396073934+112	C/G	1	396074046	+	NA	NA	NA	NA	NA	NA	G	C	G	G	G	C	C	G	C	C	C	C	G	C	G	C	C	C	G	C	C	C	C	C	C	C	C	C	C	C	C	G	G	C	C	G	G	C	G
chr1H|HvGBSv2-456_396073934+116	A/G	1	396074050	+	NA	NA	NA	NA	NA	NA	A	G	A	A	A	A	A	A	A	A	A	A	A	A	A	A	A	A	A	A	A	A	A	A	A	A	A	A	A	A	A	A	A	G	A	A	A	A	A
chr1H|HvGBSv2-456_396073934+145	C/T	1	396074079	+	NA	NA	NA	NA	NA	NA	T	C	T	T	T	C	C	T	C	C	C	C	T	C	T	C	C	C	T	C	C	C	C	C	C	C	C	C	C	C	C	T	T	C	C	T	T	C	T
chr1H|HvGBSv2-456_396073934+166	G/T	1	396074100	+	NA	NA	NA	NA	NA	NA	G	T	G	G	G	G	G	G	G	G	G	G	G	G	G	G	G	G	G	G	G	G	G	G	G	G	G	G	G	G	G	G	G	T	G	G	G	G	G
chr1H|HvGBSv2-456_396073934+167	A/T	1	396074101	+	NA	NA	NA	NA	NA	NA	T	A	T	T	T	A	A	T	A	A	A	A	T	A	T	A	A	A	T	A	A	A	A	A	A	A	A	A	A	A	A	T	T	A	A	T	T	A	T
chr1H|HvGBSv2-6544_396311776+126	T/G	1	396311902	+	NA	NA	NA	NA	NA	NA	G	G	G	G	G	T	T	G	T	T	T	T	G	T	G	T	T	T	G	T	T	G	T	T	T	T	T	T	T	T	T	G	G	G	T	G	G	T	G
chr1H|HvGBSv2-6544_396311776+167	A/G	1	396311943	+	NA	NA	NA	NA	NA	NA	G	G	G	G	G	A	A	G	A	A	A	A	G	A	G	A	A	A	G	A	A	G	A	A	A	A	A	A	A	A	A	G	G	G	A	G	G	A	G
chr1H|HvGBSv2-457_396514157+94	T/C	1	396514251	+	NA	NA	NA	NA	NA	NA	C	C	C	C	C	T	T	C	T	T	T	T	C	T	C	T	T	T	C	T	T	C	T	T	T	T	T	T	T	T	T	C	C	C	T	C	C	T	C
chr1H|HvGBSv2-6546_397208770+120	C/T	1	397208890	+	NA	NA	NA	NA	NA	NA	T	C	T	T	T	C	C	T	C	C	C	C	T	C	T	C	C	C	T	C	C	C	C	C	C	C	C	C	C	C	C	T	T	C	C	T	T	C	T
chr1H|HvGBSv2-459_397432788+105	G/A	1	397432893	+	NA	NA	NA	NA	NA	NA	G	A	G	G	G	G	G	G	G	G	G	G	G	G	G	G	G	G	G	G	G	R	G	G	G	G	G	G	G	G	G	G	G	G	G	G	G	G	G
chr1H|HvGBSv2-459_397432788+119	G/T	1	397432907	+	NA	NA	NA	NA	NA	NA	G	T	G	G	G	G	G	G	G	G	G	G	G	G	G	G	G	G	G	G	G	K	G	G	G	G	G	G	G	G	G	G	G	G	G	G	G	G	G
chr1H|HvGBSv2-459_397432788+136	T/C	1	397432924	+	NA	NA	NA	NA	NA	NA	C	T	C	C	C	T	T	C	T	T	T	T	C	T	C	T	T	T	C	T	T	T	T	T	T	T	T	T	T	T	T	C	C	T	T	C	C	T	C
chr1H|HvGBSv2-6547_397671298+159	A/C	1	397671457	+	NA	NA	NA	NA	NA	NA	C	A	C	C	C	A	A	C	A	A	A	A	C	A	C	A	A	A	C	A	A	A	A	A	A	A	A	A	A	A	A	C	C	A	A	C	C	A	C
chr1H|HvGBSv2-460_397872660+38	G/A	1	397872698	+	NA	NA	NA	NA	NA	NA	A	A	A	A	A	G	G	A	G	G	G	G	A	G	A	G	G	G	A	G	G	A	G	G	G	G	G	G	G	G	G	A	A	A	G	A	A	G	A
chr1H|HvGBSv2-460_397872660+73	C/G	1	397872733	+	NA	NA	NA	NA	NA	NA	C	G	C	C	C	C	C	C	C	C	C	C	C	C	C	C	C	C	C	C	C	G	C	C	C	C	C	C	C	C	C	C	C	C	C	C	C	C	C
chr1H|HvGBSv2-460_397872660+127	T/C	1	397872787	+	NA	NA	NA	NA	NA	NA	C	T	C	C	C	T	T	C	T	T	T	T	C	T	C	T	T	T	C	T	T	T	T	T	T	T	T	T	T	T	T	C	C	T	T	C	C	T	C
chr1H|HvGBSv2-6548_398106075+5	T/C	1	398106080	+	NA	NA	NA	NA	NA	NA	C	T	C	C	C	T	T	C	T	T	T	T	C	T	C	T	T	T	C	T	T	T	T	T	T	T	T	T	T	T	T	C	C	T	T	C	C	T	C
chr1H|HvGBSv2-6548_398106075+7	A/G	1	398106082	+	NA	NA	NA	NA	NA	NA	A	A	A	A	A	A	A	A	A	A	A	A	A	A	A	A	A	A	A	A	A	A	A	A	A	A	A	A	A	A	A	A	A	G	A	A	A	A	A
chr1H|HvGBSv2-6548_398106075+61	C/T	1	398106136	+	NA	NA	NA	NA	NA	NA	T	T	T	T	T	C	C	T	C	C	C	C	T	C	T	C	C	C	T	C	C	T	C	C	C	C	C	C	C	C	C	T	T	T	C	T	T	C	T
chr1H|HvGBSv2-6548_398106075+73	T/A	1	398106148	+	NA	NA	NA	NA	NA	NA	A	A	A	A	A	T	T	A	T	T	T	T	A	T	A	T	T	T	A	T	T	A	T	T	T	T	T	T	T	T	T	A	A	A	T	A	A	T	A
chr1H|HvGBSv2-6549_398577228+50	C/T	1	398577278	+	NA	NA	NA	NA	NA	NA	T	C	T	T	T	C	C	T	C	C	C	C	T	C	T	C	C	C	T	C	C	T	C	C	C	C	C	C	C	C	C	T	T	T	C	T	T	C	T
chr1H|HvGBSv2-6549_398577228+70	T/G	1	398577298	+	NA	NA	NA	NA	NA	NA	G	T	G	G	G	T	T	G	T	T	T	T	G	T	G	T	T	T	G	T	T	T	T	T	T	T	T	T	T	T	T	G	G	T	T	G	G	T	G
chr1H|HvGBSv2-6549_398577228+86	T/A	1	398577314	+	NA	NA	NA	NA	NA	NA	T	T	T	T	T	T	T	T	T	T	T	T	T	T	T	T	T	T	T	T	T	T	T	T	T	T	T	T	T	T	T	T	T	T	T	T	T	T	T
chr1H|HvGBSv2-6549_398577228+93	A/T	1	398577321	+	NA	NA	NA	NA	NA	NA	T	A	T	T	T	A	A	T	A	A	A	A	T	A	T	A	A	A	T	A	A	T	A	A	A	A	A	A	A	A	A	T	T	T	A	T	T	A	T
chr1H|HvGBSv2-6549_398577228+125	A/G	1	398577353	+	NA	NA	NA	NA	NA	NA	A	A	A	A	A	A	A	A	A	A	A	A	A	A	A	A	A	A	A	A	A	A	A	A	A	A	A	A	A	A	A	A	A	A	A	A	A	A	A
chr1H|HvGBSv2-462_398782480+78	A/G	1	398782558	+	NA	NA	NA	NA	NA	NA	G	A	G	G	A	G	A	G	A	A	A	A	G	A	G	A	A	R	G	A	A	A	A	A	A	G	G	A	A	A	G	G	G	A	A	G	G	A	G
chr1H|HvGBSv2-462_398782480+96	A/G	1	398782576	+	NA	NA	NA	NA	NA	NA	G	A	G	G	A	G	A	G	A	A	A	A	G	A	G	A	A	R	G	A	A	A	A	A	A	G	G	A	A	A	A	G	G	A	A	G	G	A	G
chr1H|HvGBSv2-462_398782480+107	C/G	1	398782587	+	NA	NA	NA	NA	NA	NA	G	C	G	G	C	G	C	G	C	C	C	C	G	C	G	C	C	S	G	C	C	C	C	C	C	G	G	C	C	C	G	G	G	C	C	G	G	C	G
chr1H|HvGBSv2-462_398782480+152	C/T	1	398782632	+	NA	NA	NA	NA	NA	NA	C	C	C	C	C	C	C	C	C	C	C	C	C	C	C	C	C	C	C	C	C	C	C	C	C	C	C	C	C	C	C	C	C	C	C	C	C	C	C
chr1H|HvGBSv2-6550_398999230+91	G/T	1	398999321	+	NA	NA	NA	NA	NA	NA	T	G	T	T	T	T	G	T	G	G	G	G	T	G	T	G	G	G	T	G	G	G	G	G	G	T	T	G	G	G	G	T	T	G	G	T	T	G	T
chr1H|HvGBSv2-6550_398999230+140	T/C	1	398999370	+	NA	NA	NA	NA	NA	NA	T	C	T	T	T	T	C	T	T	C	C	T	T	C	T	C	T	T	T	C	T	C	T	T	T	T	T	C	T	T	C	T	T	T	T	T	T	C	T
chr1H|HvGBSv2-463_399228716+18	C/A	1	399228734	+	NA	NA	NA	NA	NA	NA	C	A	C	C	C	C	A	C	C	A	A	C	C	A	C	A	C	C	C	A	C	C	C	C	C	C	C	A	C	C	A	C	C	C	C	C	C	A	C
chr1H|HvGBSv2-463_399228716+62	C/T	1	399228778	+	NA	NA	NA	NA	NA	NA	C	T	C	C	C	C	T	C	C	T	T	C	C	T	C	T	C	C	C	T	C	T	C	C	C	C	C	T	C	C	T	C	C	C	C	C	C	T	C
chr1H|HvGBSv2-463_399228716+75	T/A	1	399228791	+	NA	NA	NA	NA	NA	NA	T	A	T	T	T	T	A	T	T	A	A	T	T	A	T	A	T	T	T	A	T	A	T	T	T	T	T	A	T	T	A	T	T	T	T	T	T	A	T
chr1H|HvGBSv2-463_399228716+78	T/C	1	399228794	+	NA	NA	NA	NA	NA	NA	T	C	T	T	T	T	C	T	T	C	C	T	T	C	T	C	T	T	T	C	T	C	T	T	T	T	T	C	T	T	C	T	T	T	T	T	T	C	T
chr1H|HvGBSv2-463_399228716+122	T/C	1	399228838	+	NA	NA	NA	NA	NA	NA	C	T	C	C	C	C	T	C	T	T	T	T	C	T	C	T	T	T	C	T	T	T	T	T	T	C	C	T	T	T	T	C	C	T	T	C	C	T	C
chr1H|HvGBSv2-6551_399464729+97	T/A	1	399464826	+	NA	NA	NA	NA	NA	NA	A	T	A	A	A	A	T	A	T	T	T	T	A	T	A	T	T	T	A	T	T	A	T	T	T	A	A	T	T	T	A	A	A	T	T	A	A	T	A
chr1H|HvGBSv2-6552_399884730+19	T/G	1	399884749	+	NA	NA	NA	NA	NA	NA	G	T	G	G	G	G	T	G	T	T	T	T	G	T	G	G	T	T	G	T	T	T	T	T	T	G	G	T	T	T	G	G	G	T	T	G	G	T	G
chr1H|HvGBSv2-6552_399884730+107	C/T	1	399884837	+	NA	NA	NA	NA	NA	NA	C	C	C	C	C	C	C	C	C	C	C	C	C	C	C	C	C	C	C	C	C	C	C	C	C	C	C	C	C	C	C	C	C	C	C	C	C	C	C
chr1H|HvGBSv2-6552_399884730+156	G/T	1	399884886	+	NA	NA	NA	NA	NA	NA	G	G	G	G	G	G	G	G	G	G	G	G	G	G	G	G	G	G	G	G	G	G	G	G	G	G	G	G	G	G	G	G	G	G	G	G	G	G	G
chr1H|HvGBSv2-6553_400355395+46	G/A	1	400355441	+	NA	NA	NA	NA	NA	NA	A	G	A	A	A	A	G	A	G	G	G	G	A	G	A	A	G	G	A	G	G	A	G	G	G	A	A	G	G	G	A	A	A	A	G	A	A	G	A
chr1H|HvGBSv2-6553_400355395+166	T/C	1	400355561	+	NA	NA	NA	NA	NA	NA	T	T	T	T	T	T	T	T	T	T	T	T	T	T	T	T	T	T	T	T	T	T	T	T	T	T	T	T	T	T	T	T	T	T	T	T	T	T	T
chr1H|HvGBSv2-6554_400798757+31	C/G	1	400798788	+	NA	NA	NA	NA	NA	NA	G	C	G	G	G	G	C	G	C	C	C	C	G	C	G	G	C	C	G	C	C	C	C	C	C	G	G	C	C	C	G	G	G	C	C	G	G	C	G
chr1H|HvGBSv2-467_401043781+41	A/G	1	401043822	+	NA	NA	NA	NA	NA	NA	G	A	G	G	G	G	A	G	A	A	A	A	A	A	A	G	A	A	G	A	A	A	A	A	A	G	G	A	A	A	A	G	G	A	A	G	G	A	G
chr1H|HvGBSv2-467_401043781+69	T/G	1	401043850	+	NA	NA	NA	NA	NA	NA	G	T	G	G	G	G	T	G	T	T	T	T	T	T	T	G	T	T	G	T	T	T	T	T	T	G	G	T	T	T	T	G	G	T	T	G	G	T	G
chr1H|HvGBSv2-467_401043781+92	A/G	1	401043873	+	NA	NA	NA	NA	NA	NA	A	G	A	A	A	A	G	A	A	G	G	A	A	G	A	A	A	A	A	G	A	A	A	A	A	A	A	G	A	A	A	A	A	A	A	A	A	G	A
chr1H|HvGBSv2-6555_401252442+29	T/C	1	401252471	+	NA	NA	NA	NA	NA	NA	T	T	T	T	T	T	T	T	T	T	T	T	Y	T	Y	T	T	T	T	T	T	T	T	T	T	T	T	T	T	T	Y	T	T	T	T	T	T	T	T
chr1H|HvGBSv2-6555_401252442+148	C/T	1	401252590	+	NA	NA	NA	NA	NA	NA	C	C	C	C	C	C	C	C	C	C	Y	C	C	C	C	C	Y	Y	C	Y	C	C	C	C	C	C	C	C	C	C	C	C	C	C	C	C	C	C	C
chr1H|HvGBSv2-6555_401252442+166	T/C	1	401252608	+	NA	NA	NA	NA	NA	NA	C	T	C	C	C	C	T	C	T	T	T	T	C	T	C	C	T	T	C	T	T	C	T	T	T	C	C	T	T	T	C	C	C	C	T	C	C	T	C
chr1H|HvGBSv2-469_401918007+79	T/C	1	401918086	+	NA	NA	NA	NA	NA	NA	T	C	T	T	T	T	C	T	T	C	C	T	T	C	T	T	T	T	T	C	T	T	T	T	T	T	T	T	T	T	T	T	T	T	T	T	T	C	T
chr1H|HvGBSv2-469_401918007+145	G/A	1	401918152	+	NA	NA	NA	NA	NA	NA	G	A	G	G	G	G	A	G	G	A	A	G	G	A	A	G	G	G	G	A	G	A	G	G	G	G	G	G	G	G	G	A	A	A	G	G	G	A	G
chr1H|HvGBSv2-469_401918007+148	A/G	1	401918155	+	NA	NA	NA	NA	NA	NA	A	G	A	A	A	A	G	A	A	G	G	A	A	G	A	A	A	A	A	G	A	A	A	A	A	A	A	A	A	A	A	A	A	A	A	A	A	G	A
chr1H|HvGBSv2-469_401918007+153	T/A	1	401918160	+	NA	NA	NA	NA	NA	NA	T	T	T	T	T	T	T	T	T	T	T	T	T	T	A	T	T	T	T	T	T	T	T	T	T	T	T	T	T	T	T	A	A	T	T	T	T	T	T
chr1H|HvGBSv2-469_401918007+158	C/T	1	401918165	+	NA	NA	NA	NA	NA	NA	C	T	C	C	C	C	T	C	C	T	T	C	C	T	T	C	C	C	C	T	C	T	C	C	C	C	C	C	C	C	C	T	T	T	C	C	C	T	C
chr1H|HvGBSv2-469_401918007+175	T/C	1	401918182	+	NA	NA	NA	NA	NA	NA	T	C	T	T	T	T	C	T	T	C	C	T	T	C	C	T	T	T	T	C	T	C	T	T	T	T	T	T	T	T	T	C	C	C	T	T	T	C	T
chr1H|HvGBSv2-6557_402152996+17	A/G	1	402153013	+	NA	NA	NA	NA	NA	NA	A	G	A	A	A	A	G	A	A	G	G	A	A	G	A	A	A	A	A	G	A	A	A	A	A	A	A	A	A	A	A	A	A	A	A	A	A	G	A
chr1H|HvGBSv2-6557_402152996+49	A/C	1	402153045	+	NA	NA	NA	NA	NA	NA	A	A	A	A	A	A	A	A	A	A	A	A	A	A	C	A	A	A	A	A	A	A	A	A	A	A	A	A	A	A	A	C	C	A	A	C	A	A	A
chr1H|HvGBSv2-472_403272082+76	G/A	1	403272158	+	NA	NA	NA	NA	NA	NA	G	G	G	G	G	A	G	G	A	G	G	A	G	G	G	G	A	G	G	G	A	G	A	A	A	A	A	G	G	A	G	G	G	G	A	G	A	G	G
chr1H|HvGBSv2-6560_403493751+16	T/C	1	403493767	+	NA	NA	NA	NA	NA	NA	C	C	C	C	T	T	C	C	T	C	C	T	C	C	T	C	T	T	T	C	T	C	T	T	T	T	T	C	T	T	T	C	C	C	T	T	T	C	C
chr1H|HvGBSv2-6560_403493751+47	G/A	1	403493798	+	NA	NA	NA	NA	NA	NA	A	A	A	A	G	G	A	A	G	A	A	G	A	A	G	A	G	G	G	A	G	A	G	G	G	G	G	A	G	G	G	A	A	A	G	G	G	A	A
chr1H|HvGBSv2-6560_403493751+70	C/T	1	403493821	+	NA	NA	NA	NA	NA	NA	T	T	T	T	C	C	T	T	C	T	T	C	T	T	C	T	C	C	C	T	C	T	C	C	C	C	C	T	C	C	C	T	T	T	C	C	C	T	T
chr1H|HvGBSv2-6560_403493751+92	C/G	1	403493843	+	NA	NA	NA	NA	NA	NA	C	C	C	C	G	C	C	C	C	C	C	C	C	C	C	C	C	C	G	C	C	C	C	C	C	C	C	C	C	C	G	C	C	C	C	G	C	C	C
chr1H|HvGBSv2-6560_403493751+94	G/T	1	403493845	+	NA	NA	NA	NA	NA	NA	T	T	T	T	G	G	T	T	G	T	T	G	T	T	G	T	G	G	G	T	G	T	G	G	G	G	G	T	G	G	G	T	T	T	G	G	G	T	T
chr1H|HvGBSv2-6560_403493751+110	A/G	1	403493861	+	NA	NA	NA	NA	NA	NA	A	A	A	A	G	A	A	A	A	A	A	A	A	A	A	A	A	A	G	A	A	A	A	A	A	A	A	A	A	A	G	A	A	A	A	G	A	A	A
chr1H|HvGBSv2-6560_403493751+113	T/G	1	403493864	+	NA	NA	NA	NA	NA	NA	G	G	G	G	G	T	G	G	T	G	G	T	G	G	G	G	T	T	G	G	T	G	T	T	T	T	T	G	T	T	G	G	G	G	T	G	T	G	G
chr1H|HvGBSv2-6560_403493751+139	T/C	1	403493890	+	NA	NA	NA	NA	NA	NA	C	C	C	C	T	T	C	C	T	C	C	T	C	C	T	C	T	T	T	C	T	C	T	T	T	T	T	C	T	T	T	C	C	C	T	T	T	C	C
chr1H|HvGBSv2-6561_403955427+14	A/T	1	403955441	+	NA	NA	NA	NA	NA	NA	A	A	A	A	A	A	A	A	T	A	A	T	A	A	A	A	T	A	A	A	A	A	A	T	A	A	A	A	A	A	A	A	A	A	A	A	A	A	A
chr1H|HvGBSv2-6561_403955427+20	C/G	1	403955447	+	NA	NA	NA	NA	NA	NA	C	C	C	C	C	C	C	C	G	C	C	G	C	C	C	C	G	G	C	C	G	C	G	G	G	C	C	C	G	G	C	G	G	G	G	C	C	C	C
chr1H|HvGBSv2-6561_403955427+32	T/C	1	403955459	+	NA	NA	NA	NA	NA	NA	T	T	T	T	T	T	T	T	T	T	T	T	T	T	T	T	T	T	T	T	T	T	T	T	T	T	T	T	T	T	T	T	T	T	T	T	C	T	T
chr1H|HvGBSv2-6561_403955427+70	G/A	1	403955497	+	NA	NA	NA	NA	NA	NA	A	A	A	A	A	A	A	A	G	A	A	G	A	A	A	A	G	G	A	A	G	A	G	G	G	A	A	A	G	G	A	G	G	G	G	A	G	A	A
chr1H|HvGBSv2-6561_403955427+116	A/G	1	403955543	+	NA	NA	NA	NA	NA	NA	A	A	A	A	A	A	A	A	G	A	A	G	A	A	A	A	G	G	A	A	G	A	G	G	G	A	A	A	G	G	A	G	G	G	G	A	A	A	A
chr1H|HvGBSv2-6561_403955427+145	T/G	1	403955572	+	NA	NA	NA	NA	NA	NA	T	T	T	T	T	T	T	T	T	T	T	T	T	T	T	T	T	T	T	T	T	T	T	T	T	T	T	T	T	T	T	T	T	T	T	T	G	T	T
chr1H|HvGBSv2-474_404164239+34	C/A	1	404164273	+	NA	NA	NA	NA	NA	NA	A	C	C	C	C	C	C	C	C	C	C	C	C	C	C	A	C	C	C	C	C	C	C	C	C	C	C	A	C	C	C	C	C	C	C	C	C	C	A
chr1H|HvGBSv2-474_404164239+42	T/G	1	404164281	+	NA	NA	NA	NA	NA	NA	T	T	T	T	T	T	T	T	G	T	T	G	T	T	T	T	G	G	T	T	G	T	G	G	G	T	T	T	G	G	T	G	G	G	G	T	G	T	T
chr1H|HvGBSv2-474_404164239+134	A/C	1	404164373	+	NA	NA	NA	NA	NA	NA	A	A	A	A	A	A	A	A	C	A	A	C	A	A	A	A	C	C	A	A	C	A	C	C	A	A	A	A	A	A	A	A	A	A	C	A	A	A	A
chr1H|HvGBSv2-474_404164239+162	G/A	1	404164401	+	NA	NA	NA	NA	NA	NA	G	G	G	G	G	G	G	G	G	G	G	G	G	G	G	G	G	G	A	G	G	G	G	G	G	G	G	G	G	G	A	G	G	G	G	G	G	G	G
chr1H|HvGBSv2-6563_404905568+63	T/C	1	404905631	+	NA	NA	NA	NA	NA	NA	C	C	C	C	C	C	C	C	T	C	C	T	C	C	T	C	T	T	C	C	T	C	T	T	T	C	C	C	T	T	T	T	T	T	T	C	T	C	C
chr1H|HvGBSv2-476_405130260+8	T/C	1	405130268	+	NA	NA	NA	NA	NA	NA	C	T	C	C	C	C	C	C	T	C	C	T	T	C	T	C	T	T	C	C	T	C	T	T	T	C	C	C	T	T	C	T	T	T	T	C	T	C	C
chr1H|HvGBSv2-476_405130260+29	T/C	1	405130289	+	NA	NA	NA	NA	NA	NA	T	T	T	T	T	T	T	T	C	T	T	C	T	T	T	T	C	C	T	T	C	T	C	C	C	T	T	T	C	C	C	T	T	C	C	C	T	T	T
chr1H|HvGBSv2-476_405130260+44	A/G	1	405130304	+	NA	NA	NA	NA	NA	NA	G	A	G	G	G	G	G	G	A	G	G	A	A	G	A	G	A	A	G	G	A	G	A	A	A	G	G	G	A	A	G	A	A	A	A	G	A	G	G
chr1H|HvGBSv2-476_405130260+143	C/T	1	405130403	+	NA	NA	NA	NA	NA	NA	T	C	T	T	T	T	T	T	C	T	T	C	C	T	C	T	C	C	T	T	C	T	C	C	C	T	T	T	C	C	T	C	C	C	C	T	C	T	T
chr1H|HvGBSv2-6564_405300490+11	C/T	1	405300501	+	NA	NA	NA	NA	NA	NA	C	T	C	C	C	C	C	C	C	C	C	C	T	C	T	C	C	C	C	C	C	C	C	C	C	C	C	C	C	C	T	C	C	C	C	T	C	C	C
chr1H|HvGBSv2-6564_405300490+22	G/C	1	405300512	+	NA	NA	NA	NA	NA	NA	C	G	C	C	C	C	C	C	G	C	C	G	G	C	G	S	G	G	C	C	G	C	G	G	G	C	C	C	G	G	G	G	G	G	G	G	G	C	C
chr1H|HvGBSv2-6564_405300490+36	C/T	1	405300526	+	NA	NA	NA	NA	NA	NA	C	T	C	C	C	C	C	C	C	C	C	C	T	C	T	C	C	C	C	C	C	C	C	C	C	C	C	C	C	C	T	C	C	C	C	T	C	C	C
chr1H|HvGBSv2-6564_405300490+84	A/G	1	405300574	+	NA	NA	NA	NA	NA	NA	A	A	A	A	A	A	A	A	G	A	A	G	A	A	A	A	G	G	A	A	G	A	G	G	G	A	A	A	G	G	A	A	A	G	G	A	A	A	A
chr1H|HvGBSv2-6564_405300490+123	T/C	1	405300613	+	NA	NA	NA	NA	NA	NA	T	C	T	T	T	T	T	T	T	T	T	T	C	T	C	T	T	T	T	T	T	T	T	T	T	T	T	T	T	T	C	T	T	T	T	C	T	T	T
chr1H|HvGBSv2-6564_405300490+128	T/C	1	405300618	+	NA	NA	NA	NA	NA	NA	T	C	T	T	T	T	T	T	T	T	T	T	C	T	C	T	T	T	T	T	T	T	T	T	T	T	T	T	T	T	C	T	T	T	T	C	T	T	T
chr1H|HvGBSv2-6564_405300490+149	A/T	1	405300639	+	NA	NA	NA	NA	NA	NA	A	T	A	A	A	A	A	A	A	A	A	A	T	A	T	A	A	A	A	A	A	A	A	A	A	A	A	A	A	A	T	A	A	A	A	T	A	A	A
chr1H|HvGBSv2-6564_405300490+153	C/T	1	405300643	+	NA	NA	NA	NA	NA	NA	C	T	C	C	C	C	C	C	C	C	C	C	T	C	T	C	C	C	C	C	C	C	C	C	C	C	C	C	C	C	T	C	C	C	C	T	C	C	C
chr1H|HvGBSv2-478_405945017+5	A/C	1	405945022	+	NA	NA	NA	NA	NA	NA	C	A	C	C	C	C	C	C	A	C	C	A	A	C	A	C	A	A	C	C	A	C	A	A	A	C	C	C	A	A	A	A	A	A	A	A	A	C	C
chr1H|HvGBSv2-478_405945017+6	T/A	1	405945023	+	NA	NA	NA	NA	NA	NA	A	T	A	A	A	A	A	A	T	A	A	T	T	A	T	A	T	T	A	A	T	A	T	T	T	A	A	A	T	T	T	T	T	T	T	T	T	A	A
chr1H|HvGBSv2-478_405945017+30	C/A	1	405945047	+	NA	NA	NA	NA	NA	NA	A	A	A	A	A	A	A	A	C	A	A	C	C	A	C	A	C	C	A	A	C	A	C	C	C	A	A	A	C	C	C	A	A	C	C	C	A	A	A
chr1H|HvGBSv2-478_405945017+77	G/A	1	405945094	+	NA	NA	NA	NA	NA	NA	A	A	A	A	A	A	A	A	G	A	A	G	G	A	G	A	G	G	A	A	G	A	G	G	G	A	A	A	G	G	G	A	A	G	G	G	A	A	A
chr1H|HvGBSv2-478_405945017+78	T/A	1	405945095	+	NA	NA	NA	NA	NA	NA	A	T	A	A	A	A	A	A	T	A	A	T	T	A	T	A	T	T	A	A	T	A	T	T	T	A	A	A	T	T	T	T	T	T	T	T	T	A	A
chr1H|HvGBSv2-478_405945017+79	A/T	1	405945096	+	NA	NA	NA	NA	NA	NA	T	A	T	T	T	T	T	T	A	T	T	A	A	T	A	T	A	A	T	T	A	T	A	A	A	T	T	T	A	A	A	A	A	A	A	A	A	T	T
chr1H|HvGBSv2-478_405945017+83	A/G	1	405945100	+	NA	NA	NA	NA	NA	NA	G	A	G	G	G	G	G	G	A	G	G	A	A	G	A	G	A	A	G	G	A	G	A	A	A	G	G	G	A	A	A	A	A	A	A	A	A	G	G
chr1H|HvGBSv2-478_405945017+121	A/C	1	405945138	+	NA	NA	NA	NA	NA	NA	C	A	C	C	C	C	C	C	A	C	C	A	A	C	A	C	A	A	C	C	A	C	A	A	A	C	C	C	A	A	A	A	A	A	A	A	A	C	C
chr1H|HvGBSv2-478_405945017+153	A/C	1	405945170	+	NA	NA	NA	NA	NA	NA	C	A	C	C	C	C	C	C	A	C	C	A	A	C	A	C	A	A	C	C	A	C	A	A	A	C	C	C	A	A	A	A	A	A	A	A	A	C	C
chr1H|HvGBSv2-478_405945017+179	T/A	1	405945196	+	NA	NA	NA	NA	NA	NA	A	T	A	A	A	A	A	A	T	A	A	T	T	A	T	A	T	T	A	A	T	A	T	T	T	A	A	A	T	T	T	T	T	T	T	T	T	A	A
chr1H|HvGBSv2-6566_406198349+46	T/G	1	406198395	+	NA	NA	NA	NA	NA	NA	G	T	G	G	G	G	G	G	T	G	G	T	T	G	T	G	T	T	G	G	T	G	T	T	T	G	G	G	T	T	T	T	T	T	T	T	T	G	G
chr1H|HvGBSv2-6566_406198349+70	C/T	1	406198419	+	NA	NA	NA	NA	NA	NA	T	C	T	T	T	T	T	T	C	T	T	C	C	T	C	T	C	C	T	T	C	T	C	C	C	T	T	T	C	C	C	C	C	C	C	C	C	T	T
chr1H|HvGBSv2-6566_406198349+92	C/T	1	406198441	+	NA	NA	NA	NA	NA	NA	T	T	T	T	T	T	T	T	C	T	T	C	C	T	C	T	C	C	T	T	C	T	C	C	C	T	T	T	C	C	C	T	T	C	C	C	T	T	T
chr1H|HvGBSv2-6566_406198349+135	T/G	1	406198484	+	NA	NA	NA	NA	NA	NA	T	T	T	T	T	T	T	T	T	T	T	T	T	T	T	T	T	T	T	T	T	T	T	T	T	T	T	T	T	T	T	T	T	T	T	T	T	T	T
chr1H|HvGBSv2-479_406534878+13	T/C	1	406534891	+	NA	NA	NA	NA	NA	NA	C	C	C	C	C	T	C	C	T	C	C	T	T	C	T	T	T	T	C	C	T	C	T	T	T	T	T	T	T	T	T	C	C	T	T	T	C	T	T
chr1H|HvGBSv2-479_406534878+16	T/C	1	406534894	+	NA	NA	NA	NA	NA	NA	T	T	T	T	T	C	T	T	T	T	T	T	T	T	T	T	T	T	T	T	T	T	T	T	T	C	C	T	T	T	T	T	T	C	T	T	T	C	T
chr1H|HvGBSv2-479_406534878+83	T/C	1	406534961	+	NA	NA	NA	NA	NA	NA	C	C	C	C	C	C	C	C	T	C	C	T	T	C	T	T	T	T	C	C	T	C	T	T	T	C	C	T	T	T	T	C	C	C	T	T	C	C	T
chr1H|HvGBSv2-480_406878003+18	T/C	1	406878021	+	NA	NA	NA	NA	NA	NA	C	C	C	C	T	T	C	C	T	C	C	T	T	C	T	T	T	T	T	C	T	C	T	T	T	T	T	T	T	T	T	C	C	T	T	T	C	T	T
chr1H|HvGBSv2-6568_407009006+77	G/C	1	407009083	+	NA	NA	NA	NA	NA	NA	C	C	C	C	G	G	C	C	G	C	C	G	G	C	G	G	G	G	G	C	G	C	G	G	G	G	G	G	G	G	G	C	C	G	G	G	C	G	G
chr1H|HvGBSv2-6569_407541637+9	C/T	1	407541646	+	NA	NA	NA	NA	NA	NA	T	T	T	T	C	C	T	T	C	T	T	C	C	T	C	C	C	C	C	T	C	T	C	C	C	C	C	C	C	C	C	T	T	C	C	C	T	C	C
chr1H|HvGBSv2-6569_407541637+51	T/G	1	407541688	+	NA	NA	NA	NA	NA	NA	G	G	G	G	T	T	G	G	T	G	G	T	T	G	T	T	T	T	T	G	T	G	T	T	T	T	T	T	T	T	T	G	G	T	T	T	G	T	T
chr1H|HvGBSv2-482_408222661+3	G/A	1	408222664	+	NA	NA	NA	NA	NA	NA	A	A	A	A	G	G	A	A	G	A	A	G	G	A	G	G	G	G	G	A	G	A	G	G	G	G	G	G	G	G	G	A	A	G	G	G	A	G	G
chr1H|HvGBSv2-482_408222661+34	A/G	1	408222695	+	NA	NA	NA	NA	NA	NA	G	G	G	G	A	A	G	G	A	G	G	A	A	G	A	A	A	A	A	G	A	G	A	A	A	A	A	A	A	A	A	G	G	A	A	A	G	A	A
chr1H|HvGBSv2-482_408222661+58	T/C	1	408222719	+	NA	NA	NA	NA	NA	NA	C	C	C	C	T	T	C	C	T	C	C	T	T	C	T	T	T	T	T	C	T	C	T	T	T	T	T	T	T	T	T	C	C	T	T	T	C	T	T
chr1H|HvGBSv2-482_408222661+135	T/C	1	408222796	+	NA	NA	NA	NA	NA	NA	C	C	C	C	T	T	C	C	T	C	C	T	T	C	T	T	T	T	T	C	T	C	T	T	T	T	T	T	T	T	T	C	C	T	T	T	C	T	T
chr1H|HvGBSv2-482_408222661+153	G/A	1	408222814	+	NA	NA	NA	NA	NA	NA	A	A	A	A	G	G	A	A	G	A	A	G	G	A	G	G	G	G	G	A	G	A	G	G	G	G	G	G	G	G	G	A	A	G	G	G	A	G	G
chr1H|HvGBSv2-6571_408447049+98	T/A	1	408447147	+	NA	NA	NA	NA	NA	NA	A	A	A	A	T	T	A	A	T	A	A	T	T	A	T	T	T	T	T	A	T	A	T	T	T	T	T	T	T	T	T	A	A	T	T	T	A	T	T
chr1H|HvGBSv2-483_408673936+30	A/C	1	408673966	+	NA	NA	NA	NA	NA	NA	C	C	C	C	A	A	C	C	A	C	C	A	A	C	A	A	A	A	A	C	A	C	A	A	A	A	A	A	A	A	A	C	C	A	A	A	C	A	A
chr1H|HvGBSv2-483_408673936+51	C/T	1	408673987	+	NA	NA	NA	NA	NA	NA	T	T	T	T	C	C	T	T	C	T	T	C	C	T	C	C	C	C	C	T	C	T	C	C	C	C	C	C	C	C	C	T	T	C	C	C	T	C	C
chr1H|HvGBSv2-483_408673936+124	G/C	1	408674060	+	NA	NA	NA	NA	NA	NA	C	C	C	C	G	G	C	C	G	C	C	G	G	C	G	G	G	G	G	C	G	C	G	G	G	G	G	G	G	G	G	C	C	G	G	G	C	G	G
chr1H|HvGBSv2-6572_408903883+104	G/T	1	408903987	+	NA	NA	NA	NA	NA	NA	T	T	T	T	G	G	T	T	G	T	T	G	G	T	G	G	G	G	G	T	G	T	G	G	G	G	G	G	G	G	G	T	T	G	G	G	T	G	G
chr1H|HvGBSv2-484_409118079+77	T/C	1	409118156	+	NA	NA	NA	NA	NA	NA	C	C	C	C	T	T	C	C	T	C	C	T	T	C	T	T	T	T	T	C	T	C	T	T	T	T	T	T	T	T	T	C	C	T	T	T	C	T	T
chr1H|HvGBSv2-484_409118079+130	C/A	1	409118209	+	NA	NA	NA	NA	NA	NA	A	A	A	A	C	C	A	A	C	A	A	C	C	A	C	C	C	C	C	A	C	A	C	C	C	C	C	C	C	C	C	A	A	C	C	C	A	C	C
chr1H|HvGBSv2-6573_409346494+7	G/A	1	409346501	+	NA	NA	NA	NA	NA	NA	A	A	A	A	G	G	A	A	G	A	A	G	G	A	G	G	G	G	G	A	G	A	G	G	G	G	G	G	G	G	G	A	A	G	G	G	A	G	G
chr1H|HvGBSv2-6573_409346494+106	C/G	1	409346600	+	NA	NA	NA	NA	NA	NA	G	G	G	G	C	C	G	G	C	G	G	C	C	G	C	C	C	C	C	G	C	G	C	C	C	C	C	C	C	C	C	G	G	C	C	C	G	C	C
chr1H|HvGBSv2-6574_409794690+20	G/A	1	409794710	+	NA	NA	NA	NA	NA	NA	G	G	G	G	G	A	G	G	G	G	G	G	G	G	G	G	G	G	G	G	G	G	G	G	G	A	A	G	G	G	G	G	G	A	G	G	G	A	G
chr1H|HvGBSv2-6574_409794690+51	A/T	1	409794741	+	NA	NA	NA	NA	NA	NA	A	W	A	A	A	A	W	A	A	W	A	A	A	A	A	A	A	A	A	A	A	A	A	A	A	A	A	A	A	A	A	A	A	A	A	A	W	A	A
chr1H|HvGBSv2-6574_409794690+117	T/C	1	409794807	+	NA	NA	NA	NA	NA	NA	T	T	T	T	T	T	T	T	C	T	T	C	C	T	C	T	C	C	T	T	C	T	C	C	C	T	T	T	C	C	C	T	T	T	C	C	T	T	T
chr1H|HvGBSv2-6574_409794690+139	C/T	1	409794829	+	NA	NA	NA	NA	NA	NA	C	C	C	C	C	C	C	C	T	C	C	T	T	C	T	C	T	T	C	C	T	C	T	T	T	C	C	C	T	T	T	C	C	C	T	T	C	C	C
chr1H|HvGBSv2-486_410026861+9	T/C	1	410026870	+	NA	NA	NA	NA	NA	NA	T	T	T	T	T	T	T	T	C	T	T	C	C	T	C	T	C	C	T	T	C	T	C	C	C	T	T	T	C	C	C	T	T	T	C	C	T	T	C
chr1H|HvGBSv2-486_410026861+24	C/T	1	410026885	+	NA	NA	NA	NA	NA	NA	C	C	C	C	C	C	C	C	T	C	C	T	T	C	T	C	T	T	C	C	T	C	T	T	T	C	C	C	T	T	T	C	C	C	T	T	C	C	T
chr1H|HvGBSv2-486_410026861+144	T/G	1	410027005	+	NA	NA	NA	NA	NA	NA	T	T	T	T	T	T	T	T	G	T	T	G	G	T	G	T	G	G	T	T	G	T	G	G	G	T	T	T	G	G	G	T	T	T	G	G	T	T	G
chr1H|HvGBSv2-6575_410247947+39	C/T	1	410247986	+	NA	NA	NA	NA	NA	NA	C	C	C	C	C	C	C	C	T	C	C	T	T	C	T	C	T	T	C	C	T	C	T	T	T	C	C	T	T	C	T	C	C	C	T	T	C	C	C
chr1H|HvGBSv2-6575_410247947+48	C/G	1	410247995	+	NA	NA	NA	NA	NA	NA	C	C	C	C	C	C	C	C	G	C	C	G	G	C	G	C	G	G	C	C	G	C	G	G	G	C	C	G	G	C	G	C	C	C	G	G	C	C	C
chr1H|HvGBSv2-6575_410247947+66	T/C	1	410248013	+	NA	NA	NA	NA	NA	NA	C	C	C	C	C	T	C	C	T	C	C	T	T	C	T	C	T	T	C	C	T	C	T	T	T	T	T	T	T	C	T	C	C	T	T	T	C	T	T
chr1H|HvGBSv2-6575_410247947+84	A/C	1	410248031	+	NA	NA	NA	NA	NA	NA	A	A	A	A	A	C	A	A	A	A	A	A	A	A	A	A	A	A	A	A	A	A	A	A	A	C	C	A	A	A	A	A	A	C	A	A	A	C	C
chr1H|HvGBSv2-6575_410247947+143	G/C	1	410248090	+	NA	NA	NA	NA	NA	NA	G	G	G	G	G	G	G	G	C	G	G	C	C	G	C	G	C	C	G	G	C	G	C	C	C	G	G	C	C	G	C	G	G	G	C	C	G	G	G
chr1H|HvGBSv2-6575_410247947+144	G/A	1	410248091	+	NA	NA	NA	NA	NA	NA	G	G	G	G	G	G	G	G	G	G	G	G	G	G	G	G	G	G	G	G	G	G	G	G	G	G	G	G	G	G	G	G	G	G	G	G	G	G	G
chr1H|HvGBSv2-487_410433417+106	A/G	1	410433523	+	NA	NA	NA	NA	NA	NA	A	A	A	A	A	A	A	A	G	A	A	G	G	A	G	A	G	G	A	A	G	A	G	G	G	A	A	G	G	A	G	A	A	A	G	G	A	A	A
chr1H|HvGBSv2-6577_411148767+142	C/T	1	411148909	+	NA	NA	NA	NA	NA	NA	C	C	C	C	C	C	C	C	T	C	C	T	C	C	C	C	T	T	C	C	T	C	T	T	T	C	C	C	T	C	C	C	C	C	T	C	C	C	C
chr1H|HvGBSv2-6577_411148767+147	G/T	1	411148914	+	NA	NA	NA	NA	NA	NA	G	G	G	G	G	G	G	G	G	G	G	G	G	G	G	G	G	G	G	G	G	G	G	G	G	G	G	G	G	G	G	G	G	G	G	K	K	G	G
chr1H|HvGBSv2-6578_411546796+60	G/A	1	411546856	+	NA	NA	NA	NA	NA	NA	A	A	A	A	G	A	A	A	G	A	A	G	A	A	A	A	G	G	G	A	G	A	G	G	G	A	A	A	G	G	A	A	A	G	G	A	G	G	A
chr1H|HvGBSv2-6578_411546796+71	A/T	1	411546867	+	NA	NA	NA	NA	NA	NA	T	T	T	T	A	A	A	T	A	A	A	A	T	A	T	T	A	A	A	A	A	T	A	A	A	A	A	T	A	A	T	T	A	A	A	T	A	A	T
chr1H|HvGBSv2-6578_411546796+103	G/A	1	411546899	+	NA	NA	NA	NA	NA	NA	A	A	A	A	G	G	G	A	G	G	G	G	A	G	A	A	G	G	G	G	G	A	G	G	G	G	G	A	G	G	A	A	G	G	G	A	G	G	A
chr1H|HvGBSv2-6578_411546796+153	T/C	1	411546949	+	NA	NA	NA	NA	NA	NA	C	C	T	T	T	T	T	C	T	T	T	T	C	T	C	C	T	T	T	T	T	T	T	T	T	T	T	C	T	T	C	C	T	T	T	C	T	T	C
chr1H|HvGBSv2-6579_411992592+13	A/G	1	411992605	+	NA	NA	NA	NA	NA	NA	A	A	A	A	A	A	A	A	G	A	A	G	A	A	A	A	G	G	A	A	G	A	A	G	A	A	A	A	A	A	A	A	A	A	A	A	A	A	A
chr1H|HvGBSv2-6579_411992592+60	C/T	1	411992652	+	NA	NA	NA	NA	NA	NA	C	C	C	C	C	C	C	C	T	C	C	T	C	C	C	C	T	T	C	C	T	C	T	T	T	C	C	C	T	T	C	T	T	C	T	C	T	C	C
chr1H|HvGBSv2-6579_411992592+122	T/C	1	411992714	+	NA	NA	NA	NA	NA	NA	C	C	C	C	T	T	T	C	T	T	T	T	C	T	C	C	T	T	T	T	T	C	T	T	T	T	T	C	T	T	C	T	T	C	T	C	T	T	C
chr1H|HvGBSv2-6579_411992592+170	A/C	1	411992762	+	NA	NA	NA	NA	NA	NA	C	C	C	C	A	A	A	C	A	A	A	A	C	A	C	C	A	A	A	A	A	C	A	A	A	A	A	C	A	A	C	A	A	C	A	C	A	A	C
chr1H|HvGBSv2-6579_411992592+175	C/G	1	411992767	+	NA	NA	NA	NA	NA	NA	G	G	G	G	C	C	C	G	C	C	C	C	G	C	G	G	C	C	C	C	C	G	C	C	C	C	C	G	C	C	G	C	C	G	C	G	C	C	G
chr1H|HvGBSv2-491_412285671+21	T/C	1	412285692	+	NA	NA	NA	NA	NA	NA	T	T	T	T	C	C	C	T	T	C	C	T	T	C	T	T	T	T	C	C	T	T	T	T	T	C	C	T	T	T	T	T	T	T	T	T	T	T	T
chr1H|HvGBSv2-491_412285671+45	T/C	1	412285716	+	NA	NA	NA	NA	NA	NA	T	T	T	T	T	T	T	T	T	T	T	T	T	T	T	T	T	T	T	T	T	T	T	T	T	T	T	T	T	C	T	C	C	T	T	T	C	T	T
chr1H|HvGBSv2-6580_412503104+83	A/G	1	412503187	+	NA	NA	NA	NA	NA	NA	A	A	A	A	G	G	G	A	A	G	G	A	A	G	A	A	A	A	G	G	A	A	A	A	A	G	G	A	A	A	A	A	A	A	A	A	A	A	A
chr1H|HvGBSv2-6580_412503104+135	T/C	1	412503239	+	NA	NA	NA	NA	NA	NA	T	T	T	T	T	T	T	T	C	T	T	C	T	T	T	T	C	C	T	T	C	T	C	C	C	T	T	T	C	T	T	T	T	T	C	T	T	T	T
chr1H|HvGBSv2-492_412771487+44	C/T	1	412771531	+	NA	NA	NA	NA	NA	NA	T	T	T	T	T	T	T	T	C	T	T	C	T	T	T	T	C	C	T	T	C	C	C	C	C	T	T	T	C	C	T	C	C	T	C	T	C	T	T
chr1H|HvGBSv2-492_412771487+45	C/T	1	412771532	+	NA	NA	NA	NA	NA	NA	T	T	T	T	T	T	T	T	C	T	T	C	T	T	T	T	C	C	T	T	C	C	C	C	C	T	T	T	C	C	T	C	C	T	C	T	C	T	T
chr1H|HvGBSv2-492_412771487+63	T/G	1	412771550	+	NA	NA	NA	NA	NA	NA	G	G	G	G	G	G	G	G	T	G	G	T	G	G	G	G	T	T	G	G	T	T	T	T	T	G	G	G	T	T	G	T	T	G	T	G	T	G	G
chr1H|HvGBSv2-492_412771487+82	T/C	1	412771569	+	NA	NA	NA	NA	NA	NA	C	C	C	C	C	C	C	C	T	C	C	T	C	C	C	C	T	T	C	C	T	T	T	T	T	C	C	C	T	T	C	T	T	C	T	C	T	C	C
chr1H|HvGBSv2-492_412771487+84	G/A	1	412771571	+	NA	NA	NA	NA	NA	NA	G	G	G	G	G	G	G	G	G	G	G	G	G	G	G	G	G	G	G	G	G	A	G	G	G	G	G	G	G	A	G	A	A	G	G	G	A	G	G
chr1H|HvGBSv2-492_412771487+96	A/G	1	412771583	+	NA	NA	NA	NA	NA	NA	G	G	G	G	G	G	G	G	A	G	G	A	G	G	G	G	A	A	G	G	A	A	A	A	A	G	G	G	A	A	G	A	A	G	A	G	A	G	G
chr1H|HvGBSv2-492_412771487+164	A/G	1	412771651	+	NA	NA	NA	NA	NA	NA	G	G	G	G	G	G	G	G	A	G	G	A	G	G	G	G	A	A	G	G	A	A	A	A	A	G	G	G	A	A	G	A	A	G	A	G	A	G	G
chr1H|HvGBSv2-6581_412952769+28	C/G	1	412952797	+	NA	NA	NA	NA	NA	NA	C	C	C	C	C	C	C	C	G	C	C	G	C	C	C	C	G	G	C	C	G	G	G	G	G	C	C	C	G	G	C	G	G	C	G	C	G	C	C
chr1H|HvGBSv2-6581_412952769+50	A/C	1	412952819	+	NA	NA	NA	NA	NA	NA	A	A	A	A	A	A	A	A	C	A	A	C	A	A	A	A	C	C	A	A	C	C	C	C	C	A	A	A	C	C	A	C	C	A	C	A	C	A	A
chr1H|HvGBSv2-6581_412952769+73	T/C	1	412952842	+	NA	NA	NA	NA	NA	NA	C	C	C	C	C	C	C	C	T	C	C	T	C	C	C	C	T	T	C	C	T	T	T	T	T	C	C	C	T	T	C	T	T	C	T	C	T	C	C
chr1H|HvGBSv2-6581_412952769+84	T/C	1	412952853	+	NA	NA	NA	NA	NA	NA	C	C	C	C	T	T	T	C	T	T	T	T	C	T	C	C	T	T	T	T	T	T	T	T	T	T	T	C	T	T	C	T	T	C	T	C	T	C	C
chr1H|HvGBSv2-6581_412952769+106	C/G	1	412952875	+	NA	NA	NA	NA	NA	NA	C	C	C	C	G	G	G	C	C	G	G	C	C	G	C	C	C	C	G	G	C	C	C	C	C	G	G	C	C	C	C	C	C	C	C	C	C	C	C
chr1H|HvGBSv2-6581_412952769+110	A/C	1	412952879	+	NA	NA	NA	NA	NA	NA	C	C	C	C	A	A	A	C	A	A	A	A	C	A	C	C	A	A	A	A	A	A	A	A	A	A	A	C	A	A	C	A	A	C	A	C	A	C	C
chr1H|HvGBSv2-493_413172034+32	A/G	1	413172066	+	NA	NA	NA	NA	NA	NA	A	A	A	A	A	A	A	A	A	A	A	A	A	A	A	A	A	A	G	A	A	A	A	A	A	A	A	A	A	A	G	A	A	A	A	A	A	A	A
chr1H|HvGBSv2-493_413172034+46	T/C	1	413172080	+	NA	NA	NA	NA	NA	NA	C	C	C	C	C	T	C	C	T	C	C	T	C	C	C	C	T	T	C	C	T	T	T	T	T	T	T	T	T	T	C	T	T	C	T	C	T	C	C
chr1H|HvGBSv2-493_413172034+113	G/T	1	413172147	+	NA	NA	NA	NA	NA	NA	T	T	T	T	T	G	T	T	G	T	T	G	T	T	T	T	G	G	T	T	G	G	G	G	G	G	G	G	G	G	T	G	G	T	G	T	G	T	T
chr1H|HvGBSv2-493_413172034+127	A/T	1	413172161	+	NA	NA	NA	NA	NA	NA	A	A	A	A	A	A	A	A	T	A	A	T	A	A	A	A	T	T	A	A	T	A	T	T	T	A	A	A	T	A	A	A	A	A	T	A	A	A	A
chr1H|HvGBSv2-494_413606581+27	A/G	1	413606608	+	NA	NA	NA	NA	NA	NA	G	A	G	G	G	G	G	G	A	A	G	A	A	G	A	G	A	A	G	G	A	A	A	A	A	G	G	A	A	G	A	G	G	G	A	A	G	A	G
chr1H|HvGBSv2-495_414091751+8	C/T	1	414091759	+	NA	NA	NA	NA	NA	NA	T	T	T	T	T	C	T	T	C	T	T	C	T	T	T	T	C	C	T	T	C	C	C	C	C	T	C	T	C	C	T	C	C	C	C	T	C	T	T
chr1H|HvGBSv2-495_414091751+9	A/G	1	414091760	+	NA	NA	NA	NA	NA	NA	G	G	G	G	G	A	A	G	A	A	A	A	G	A	G	G	A	A	G	A	A	A	A	A	A	A	A	G	A	A	G	A	A	A	A	G	A	G	G
chr1H|HvGBSv2-495_414091751+41	A/T	1	414091792	+	NA	NA	NA	NA	NA	NA	T	T	T	T	T	A	T	T	A	T	T	A	T	T	T	T	A	A	T	T	A	A	A	A	A	T	A	T	A	A	T	A	A	A	A	T	A	T	T
chr1H|HvGBSv2-495_414091751+48	A/T	1	414091799	+	NA	NA	NA	NA	NA	NA	T	T	T	T	T	A	T	T	A	T	T	A	T	T	T	T	A	A	T	T	A	A	A	A	A	T	A	T	A	A	T	A	A	A	A	T	A	T	T
chr1H|HvGBSv2-495_414091751+67	C/G	1	414091818	+	NA	NA	NA	NA	NA	NA	C	C	C	C	C	C	C	C	G	C	C	G	C	C	C	C	G	G	C	C	G	C	G	G	G	C	C	C	G	C	C	C	C	C	G	C	C	C	C
chr1H|HvGBSv2-495_414091751+76	A/T	1	414091827	+	NA	NA	NA	NA	NA	NA	A	A	A	A	A	A	T	A	A	T	T	A	A	T	A	A	A	A	A	T	A	A	A	A	A	A	A	A	A	A	A	A	A	A	A	A	A	A	A
chr1H|HvGBSv2-495_414091751+102	G/A	1	414091853	+	NA	NA	NA	NA	NA	NA	A	A	A	A	A	G	A	A	G	A	A	G	A	A	A	A	G	G	A	A	G	G	G	G	G	A	G	A	G	G	A	G	G	G	G	A	G	A	A
chr1H|HvGBSv2-495_414091751+118	C/T	1	414091869	+	NA	NA	NA	NA	NA	NA	C	C	C	C	C	C	C	C	C	C	C	C	C	C	C	C	C	C	C	C	C	C	C	C	C	C	C	C	C	C	C	C	C	T	C	C	C	C	C
chr1H|HvGBSv2-495_414091751+158	T/G	1	414091909	+	NA	NA	NA	NA	NA	NA	T	T	T	T	T	T	T	T	T	T	T	T	T	T	T	T	T	T	T	T	T	T	T	T	T	T	T	T	T	T	T	T	T	G	T	T	T	T	T
chr1H|HvGBSv2-6584_414317575+9	A/G	1	414317584	+	NA	NA	NA	NA	NA	NA	A	A	A	A	A	A	A	A	G	A	A	G	A	A	A	A	G	G	A	A	G	A	G	G	G	A	A	A	G	A	A	A	A	A	G	A	A	A	A
chr1H|HvGBSv2-6584_414317575+17	A/C	1	414317592	+	NA	NA	NA	NA	NA	NA	A	A	A	A	A	A	A	A	A	A	A	A	A	A	A	A	A	A	A	A	A	A	A	A	A	A	A	A	A	A	A	A	A	A	A	A	A	A	A
chr1H|HvGBSv2-6584_414317575+28	A/C	1	414317603	+	NA	NA	NA	NA	NA	NA	A	A	C	A	A	C	A	A	A	A	A	A	A	A	A	A	A	A	A	A	A	C	A	A	A	C	C	A	A	C	A	C	C	A	A	A	C	A	A
chr1H|HvGBSv2-6584_414317575+42	C/T	1	414317617	+	NA	NA	NA	NA	NA	NA	C	C	C	C	C	C	C	C	C	C	C	C	C	C	C	C	C	C	C	C	C	C	C	C	C	C	C	C	C	C	C	C	C	C	C	C	C	C	C
chr1H|HvGBSv2-6584_414317575+91	A/G	1	414317666	+	NA	NA	NA	NA	NA	NA	G	G	G	G	G	A	G	G	A	G	G	A	G	G	G	G	A	A	G	G	A	A	A	A	A	A	A	G	A	A	G	A	A	A	A	G	A	G	G
chr1H|HvGBSv2-496_414530017+30	G/A	1	414530047	+	NA	NA	NA	NA	NA	NA	G	G	G	G	G	G	G	G	G	G	G	G	G	G	G	G	G	G	G	G	G	G	G	G	G	G	G	G	G	G	G	A	A	G	G	G	G	G	G
chr1H|HvGBSv2-496_414530017+39	G/A	1	414530056	+	NA	NA	NA	NA	NA	NA	A	G	A	A	A	G	G	A	G	G	G	G	A	A	A	A	G	G	A	R	G	G	G	G	G	G	G	G	G	G	A	G	G	G	G	A	G	A	A
chr1H|HvGBSv2-496_414530017+137	T/C	1	414530154	+	NA	NA	NA	NA	NA	NA	C	T	C	C	C	T	T	C	T	T	T	T	C	C	C	C	T	T	C	Y	T	T	T	T	T	T	T	T	T	T	C	T	T	T	T	C	T	C	C
chr1H|HvGBSv2-496_414530017+155	A/C	1	414530172	+	NA	NA	NA	NA	NA	NA	C	A	C	C	C	A	A	C	A	A	A	A	C	C	C	C	A	A	C	M	A	A	A	A	A	A	A	A	A	A	C	A	A	A	A	C	A	C	C
chr1H|HvGBSv2-6585_414755101+116	A/G	1	414755217	+	NA	NA	NA	NA	NA	NA	G	G	G	G	G	A	A	G	A	A	A	A	G	A	G	G	A	A	G	A	A	A	A	A	A	A	A	G	A	A	G	A	A	A	A	G	A	G	G
chr1H|HvGBSv2-6585_414755101+163	T/C	1	414755264	+	NA	NA	NA	NA	NA	NA	C	C	C	C	C	T	T	C	T	T	T	T	C	T	C	C	T	T	C	T	T	T	T	T	T	T	T	C	T	T	C	T	T	T	T	C	T	C	C
chr1H|HvGBSv2-497_414865812+44	T/C	1	414865856	+	NA	NA	NA	NA	NA	NA	T	T	T	T	T	T	T	T	C	T	T	C	T	T	T	T	C	C	T	T	C	T	C	C	C	T	T	T	C	T	T	T	T	T	C	T	T	T	T
chr1H|HvGBSv2-498_415419615+6	G/C	1	415419621	+	NA	NA	NA	NA	NA	NA	C	G	C	C	C	G	G	C	G	G	G	G	C	G	C	C	G	G	C	G	G	C	G	G	G	G	G	G	G	G	C	G	G	G	G	C	G	C	C
chr1H|HvGBSv2-498_415419615+11	A/G	1	415419626	+	NA	NA	NA	NA	NA	NA	A	A	A	A	A	A	A	A	G	A	A	G	A	A	A	A	G	G	A	A	G	A	G	G	G	A	A	A	G	A	A	A	A	A	G	A	A	A	A
chr1H|HvGBSv2-498_415419615+90	C/T	1	415419705	+	NA	NA	NA	NA	NA	NA	T	C	T	T	T	C	T	T	C	T	T	C	T	T	T	T	C	C	T	T	C	T	C	C	C	C	C	C	C	C	T	C	C	T	C	T	C	T	T
chr1H|HvGBSv2-498_415419615+128	G/C	1	415419743	+	NA	NA	NA	NA	NA	NA	C	G	C	C	C	G	G	C	G	G	G	G	C	G	C	C	G	G	C	G	G	C	G	G	G	G	G	G	G	G	C	G	G	G	G	C	G	C	C
chr1H|HvGBSv2-499_415876762+9	T/C	1	415876771	+	NA	NA	NA	NA	NA	NA	C	T	C	C	C	T	C	C	T	C	C	T	C	C	C	C	T	T	C	C	T	T	T	T	T	T	T	T	T	T	C	T	T	C	T	C	T	C	C
chr1H|HvGBSv2-499_415876762+35	C/T	1	415876797	+	NA	NA	NA	NA	NA	NA	T	C	T	T	T	C	T	T	C	T	T	C	T	T	T	T	C	C	T	T	C	C	C	C	C	C	C	C	C	C	T	C	C	T	C	T	C	T	T
chr1H|HvGBSv2-499_415876762+37	A/G	1	415876799	+	NA	NA	NA	NA	NA	NA	A	A	A	A	A	A	G	A	A	G	G	A	A	G	A	A	A	A	A	G	A	A	A	A	A	A	A	A	A	A	A	A	A	G	A	A	A	A	A
chr1H|HvGBSv2-499_415876762+65	A/C	1	415876827	+	NA	NA	NA	NA	NA	NA	C	A	C	C	C	A	C	C	A	C	C	A	C	C	C	C	A	A	C	C	A	A	A	A	A	A	A	A	A	A	C	A	A	C	A	C	A	C	C
chr1H|HvGBSv2-499_415876762+81	C/G	1	415876843	+	NA	NA	NA	NA	NA	NA	G	C	G	G	G	C	G	G	C	G	G	C	G	G	G	G	C	C	G	G	C	C	C	C	C	C	C	C	C	C	G	C	C	G	C	G	C	G	G
chr1H|HvGBSv2-499_415876762+91	A/C	1	415876853	+	NA	NA	NA	NA	NA	NA	C	A	C	C	C	A	A	C	A	A	A	A	C	A	C	C	A	A	C	A	A	A	A	A	A	A	A	A	A	A	C	A	A	A	A	C	A	C	C
chr1H|HvGBSv2-499_415876762+103	A/G	1	415876865	+	NA	NA	NA	NA	NA	NA	G	A	G	G	G	A	A	G	A	A	A	A	G	A	G	G	A	A	G	A	A	A	A	A	A	A	A	A	A	A	G	A	A	A	A	G	A	G	G
chr1H|HvGBSv2-499_415876762+124	T/C	1	415876886	+	NA	NA	NA	NA	NA	NA	T	T	T	T	T	C	T	T	T	T	T	T	T	T	T	T	T	T	T	T	T	T	T	T	T	T	C	T	T	T	T	C	C	T	T	T	T	T	T
chr1H|HvGBSv2-499_415876762+131	A/G	1	415876893	+	NA	NA	NA	NA	NA	NA	G	A	G	G	G	A	G	G	A	G	G	A	G	G	G	G	A	A	G	G	A	A	A	A	A	A	A	A	A	A	G	A	A	G	A	G	A	G	G
chr1H|HvGBSv2-6588_416106623+83	C/A	1	416106706	+	NA	NA	NA	NA	NA	NA	A	C	A	A	A	C	A	A	C	A	A	C	A	A	A	A	C	C	A	A	C	C	C	C	C	C	C	C	C	C	A	C	C	A	C	A	C	A	A
chr1H|HvGBSv2-6588_416106623+85	A/T	1	416106708	+	NA	NA	NA	NA	NA	NA	T	A	T	T	T	A	T	T	A	T	T	A	T	T	T	T	A	A	T	T	A	A	A	A	A	A	A	A	A	A	T	A	A	T	A	T	A	T	T
chr1H|HvGBSv2-6588_416106623+91	T/C	1	416106714	+	NA	NA	NA	NA	NA	NA	C	T	C	C	C	T	C	C	T	C	C	T	C	C	C	C	T	T	C	C	T	T	T	T	T	T	T	T	T	T	C	T	T	C	T	C	T	C	C
chr1H|HvGBSv2-500_416286606+72	A/G	1	416286678	+	NA	NA	NA	NA	NA	NA	G	A	G	G	G	A	G	G	A	G	G	A	G	G	G	G	A	A	G	G	A	A	A	A	A	A	A	A	A	A	G	A	A	G	A	G	A	G	G
chr1H|HvGBSv2-500_416286606+125	G/C	1	416286731	+	NA	NA	NA	NA	NA	NA	G	G	G	G	G	G	G	G	C	G	G	C	G	G	G	G	C	G	G	G	G	G	G	C	G	G	G	G	G	G	G	G	G	G	G	G	G	G	G
chr1H|HvGBSv2-6589_416574483+128	A/G	1	416574611	+	NA	NA	NA	NA	NA	NA	A	A	A	A	A	A	A	A	G	A	A	G	A	A	A	A	G	G	A	A	G	A	G	G	G	A	A	A	G	A	A	A	A	A	G	A	A	A	A
chr1H|HvGBSv2-6589_416574483+133	G/T	1	416574616	+	NA	NA	NA	NA	NA	NA	T	G	T	T	T	G	T	T	G	T	T	G	T	T	T	T	G	G	T	T	G	G	G	G	G	G	G	G	G	G	T	G	G	G	G	T	G	T	T
chr1H|HvGBSv2-501_416823193+2	A/G	1	416823195	+	NA	NA	NA	NA	NA	NA	A	A	A	A	A	A	G	A	A	G	G	A	A	G	A	A	A	A	A	G	A	A	A	A	A	A	A	A	A	A	A	A	A	G	A	A	A	A	A
chr1H|HvGBSv2-501_416823193+12	T/C	1	416823205	+	NA	NA	NA	NA	NA	NA	T	T	T	T	T	T	C	T	T	C	C	T	T	C	T	T	T	T	T	C	T	T	T	T	T	T	T	T	T	T	T	T	T	C	T	T	T	T	T
chr1H|HvGBSv2-501_416823193+24	T/C	1	416823217	+	NA	NA	NA	NA	NA	NA	T	T	T	T	T	T	C	T	T	C	C	T	T	C	T	T	T	T	T	C	T	T	T	T	T	T	T	T	T	T	T	T	T	C	T	T	T	T	T
chr1H|HvGBSv2-501_416823193+41	C/G	1	416823234	+	NA	NA	NA	NA	NA	NA	C	C	C	C	C	C	G	C	C	G	G	C	C	G	C	C	C	C	C	G	C	C	C	C	C	C	C	C	C	C	C	C	C	G	C	C	C	C	C
chr1H|HvGBSv2-501_416823193+76	T/A	1	416823269	+	NA	NA	NA	NA	NA	NA	T	T	T	T	T	T	A	T	T	A	A	T	T	A	T	T	T	T	T	A	T	T	T	T	T	T	T	T	T	T	T	T	T	A	T	T	T	T	T
chr1H|HvGBSv2-501_416823193+89	G/T	1	416823282	+	NA	NA	NA	NA	NA	NA	G	G	G	G	G	G	T	G	G	T	T	G	G	T	G	G	G	G	G	T	G	G	G	G	G	G	G	G	G	G	G	G	G	T	G	G	G	G	G
chr1H|HvGBSv2-501_416823193+104	T/C	1	416823297	+	NA	NA	NA	NA	NA	NA	T	T	T	T	T	T	T	T	C	T	T	C	T	T	T	T	C	C	T	T	C	T	C	C	C	T	T	T	C	T	T	T	T	T	C	T	T	T	T
chr1H|HvGBSv2-6590_416953197+7	A/G	1	416953204	+	NA	NA	NA	NA	NA	NA	A	A	G	G	G	A	A	A	A	A	A	A	A	A	A	A	A	A	G	A	A	A	A	A	A	A	A	A	A	A	A	A	A	A	A	A	A	G	A
chr1H|HvGBSv2-6590_416953197+42	A/T	1	416953239	+	NA	NA	NA	NA	NA	NA	A	T	A	A	A	A	A	A	T	A	A	T	A	A	A	A	T	T	A	A	T	A	T	T	T	A	A	T	T	A	A	A	A	A	T	A	A	A	A
chr1H|HvGBSv2-6590_416953197+109	A/G	1	416953306	+	NA	NA	NA	NA	NA	NA	A	A	A	A	A	A	G	G	A	G	G	A	A	G	A	A	A	A	A	G	A	A	A	A	A	A	A	A	A	A	A	A	A	G	A	A	A	A	A
chr1H|HvGBSv2-6592_417890126+6	T/G	1	417890132	+	NA	NA	NA	NA	NA	NA	T	T	T	T	T	T	T	T	T	T	T	T	T	T	T	T	T	T	T	T	T	T	T	T	T	T	T	T	T	T	T	T	T	T	T	T	T	T	T
chr1H|HvGBSv2-6592_417890126+13	T/A	1	417890139	+	NA	NA	NA	NA	NA	NA	T	T	T	T	T	T	T	T	T	T	T	T	T	T	T	T	T	T	T	T	T	T	T	T	T	T	T	T	T	T	T	T	T	T	T	T	T	T	T
chr1H|HvGBSv2-6592_417890126+16	A/G	1	417890142	+	NA	NA	NA	NA	NA	NA	A	A	A	A	A	A	A	A	A	A	A	A	A	A	A	A	A	A	A	A	A	A	A	A	A	A	A	A	A	A	A	A	A	A	A	A	A	A	A
chr1H|HvGBSv2-6592_417890126+20	C/T	1	417890146	+	NA	NA	NA	NA	NA	NA	C	C	C	C	C	C	C	C	C	C	C	C	C	C	C	C	C	C	C	C	C	C	C	C	C	C	C	C	C	C	C	C	C	C	C	C	C	C	C
chr1H|HvGBSv2-6592_417890126+40	G/A	1	417890166	+	NA	NA	NA	NA	NA	NA	G	G	G	G	G	G	G	G	G	G	G	G	G	G	G	G	G	G	G	G	G	G	G	G	G	G	G	G	G	G	G	G	G	G	G	G	G	G	G
chr1H|HvGBSv2-6592_417890126+43	A/G	1	417890169	+	NA	NA	NA	NA	NA	NA	A	A	A	A	A	A	A	A	A	A	A	A	A	A	A	A	A	A	A	A	A	A	A	A	A	A	A	A	A	A	A	A	A	A	A	A	A	A	A
chr1H|HvGBSv2-6592_417890126+51	T/G	1	417890177	+	NA	NA	NA	NA	NA	NA	T	T	T	T	T	T	T	T	T	T	T	T	T	T	T	T	T	T	T	T	T	T	T	T	T	T	T	T	T	T	T	T	T	T	T	T	T	T	T
chr1H|HvGBSv2-6592_417890126+61	G/A	1	417890187	+	NA	NA	NA	NA	NA	NA	G	G	G	G	G	G	G	G	G	G	G	G	G	G	G	G	G	G	G	G	G	G	G	G	G	G	G	G	G	G	G	G	G	G	G	G	G	G	G
chr1H|HvGBSv2-6592_417890126+85	A/G	1	417890211	+	NA	NA	NA	NA	NA	NA	A	A	A	A	A	A	A	A	A	A	A	A	A	A	A	A	A	A	A	A	A	A	A	A	A	A	A	A	A	A	A	A	A	A	A	A	A	A	A
chr1H|HvGBSv2-6592_417890126+110	T/G	1	417890236	+	NA	NA	NA	NA	NA	NA	T	T	T	T	T	T	T	T	T	T	T	T	T	T	T	T	T	T	T	T	T	T	T	T	T	T	T	T	T	T	T	T	T	T	T	T	T	T	T
chr1H|HvGBSv2-6592_417890126+141	T/G	1	417890267	+	NA	NA	NA	NA	NA	NA	T	T	T	T	T	T	T	T	G	T	T	G	T	T	T	T	G	G	T	T	G	T	G	G	G	T	T	T	G	T	T	T	T	T	G	T	T	T	T
chr1H|HvGBSv2-6592_417890126+150	T/C	1	417890276	+	NA	NA	NA	NA	NA	NA	C	T	C	C	T	T	C	T	T	C	C	T	C	C	T	T	T	T	T	C	T	T	T	T	T	T	T	T	T	T	T	T	T	Y	T	C	T	C	T
chr1H|HvGBSv2-6592_417890126+157	C/T	1	417890283	+	NA	NA	NA	NA	NA	NA	C	C	C	C	C	C	C	C	C	C	C	C	C	C	C	C	C	C	C	C	C	C	C	C	C	C	C	C	C	C	C	C	C	C	C	C	C	C	C
chr1H|HvGBSv2-504_418130539+19	G/C	1	418130558	+	NA	NA	NA	NA	NA	NA	G	G	G	G	G	G	G	G	C	G	G	C	G	G	G	G	C	C	G	G	C	G	G	C	G	G	G	G	G	G	G	G	G	G	G	G	G	G	G
chr1H|HvGBSv2-504_418130539+27	G/T	1	418130566	+	NA	NA	NA	NA	NA	NA	T	G	T	T	T	G	T	T	G	T	T	G	T	T	T	T	G	G	T	T	G	G	G	G	G	G	G	G	G	G	T	G	G	G	G	T	G	T	T
chr1H|HvGBSv2-6593_418369513+7	A/C	1	418369520	+	NA	NA	NA	NA	NA	NA	C	A	C	C	C	A	A	C	A	A	A	A	C	A	C	C	A	A	C	A	A	A	A	A	A	A	A	A	A	A	C	A	A	A	A	C	A	C	C
chr1H|HvGBSv2-6593_418369513+22	C/A	1	418369535	+	NA	NA	NA	NA	NA	NA	C	C	C	C	M	C	C	C	M	C	C	C	C	C	C	C	C	C	C	C	C	C	C	C	C	C	C	C	C	C	C	C	C	C	C	C	C	C	M
chr1H|HvGBSv2-6593_418369513+24	G/T	1	418369537	+	NA	NA	NA	NA	NA	NA	G	G	G	G	G	G	G	G	G	G	G	G	G	G	G	G	K	G	G	G	G	G	G	G	G	G	G	G	G	G	G	G	G	G	G	G	G	G	G
chr1H|HvGBSv2-6593_418369513+81	T/C	1	418369594	+	NA	NA	NA	NA	NA	NA	T	T	T	T	T	T	T	T	C	T	T	C	T	T	T	T	C	C	T	T	C	T	C	C	C	T	T	T	C	T	T	T	T	T	C	T	T	T	T
chr1H|HvGBSv2-6594_418781716+9	T/C	1	418781725	+	NA	NA	NA	NA	NA	NA	C	T	C	C	C	C	C	C	T	C	C	T	C	C	C	C	T	T	C	C	T	T	T	T	T	T	T	T	T	T	C	T	T	T	T	C	T	C	T
chr1H|HvGBSv2-6594_418781716+84	T/C	1	418781800	+	NA	NA	NA	NA	NA	NA	C	T	C	C	C	C	C	C	T	C	C	T	C	C	C	C	T	T	C	C	T	T	T	T	T	T	T	T	T	T	C	T	T	T	T	C	T	C	T
chr1H|HvGBSv2-6594_418781716+108	T/C	1	418781824	+	NA	NA	NA	NA	NA	NA	T	T	T	T	T	T	T	T	C	T	T	C	T	T	T	T	C	C	T	T	C	T	C	C	C	T	T	T	C	C	T	T	T	T	C	T	T	T	T
chr1H|HvGBSv2-6594_418781716+132	T/A	1	418781848	+	NA	NA	NA	NA	NA	NA	A	T	A	A	A	A	A	A	T	A	A	T	A	A	A	A	T	T	A	A	T	T	T	T	T	T	T	T	T	T	A	T	T	T	T	A	T	A	T
chr1H|HvGBSv2-6594_418781716+148	G/C	1	418781864	+	NA	NA	NA	NA	NA	NA	C	G	C	C	C	C	C	C	G	C	C	G	C	C	C	C	G	G	C	C	G	G	G	G	G	G	G	G	G	G	C	G	G	G	G	C	G	C	G
chr1H|HvGBSv2-6594_418781716+150	T/C	1	418781866	+	NA	NA	NA	NA	NA	NA	C	T	C	C	C	C	C	C	T	C	C	T	C	C	C	C	T	T	C	C	T	T	T	T	T	T	T	T	T	T	C	T	T	T	T	C	T	C	T
chr1H|HvGBSv2-6594_418781716+151	G/A	1	418781867	+	NA	NA	NA	NA	NA	NA	A	G	A	A	A	A	A	A	G	A	A	G	A	A	A	A	G	G	A	A	G	G	G	G	G	G	G	G	G	G	A	G	G	G	G	A	G	A	G
chr1H|HvGBSv2-506_419024327+120	A/G	1	419024447	+	NA	NA	NA	NA	NA	NA	A	A	A	A	A	A	A	A	G	A	A	G	A	A	A	A	G	G	A	A	G	A	G	G	G	A	A	A	G	G	A	A	A	G	G	A	A	A	A
chr1H|HvGBSv2-506_419024327+127	C/T	1	419024454	+	NA	NA	NA	NA	NA	NA	T	T	T	T	T	C	C	T	C	C	C	C	T	C	T	T	C	C	T	C	C	T	C	C	C	T	T	T	C	C	T	T	T	C	C	T	T	T	T
chr1H|HvGBSv2-507_419381716+71	A/G	1	419381787	+	NA	NA	NA	NA	NA	NA	A	A	G	G	A	G	G	A	A	G	G	A	A	G	A	A	A	A	A	G	A	A	A	A	A	A	A	A	A	A	A	A	A	A	A	A	A	A	A
chr1H|HvGBSv2-6596_419697193+9	A/G	1	419697202	+	NA	NA	NA	NA	NA	NA	A	A	A	A	A	A	A	A	G	A	A	G	A	A	A	A	G	G	A	A	G	A	G	G	A	A	A	A	G	G	A	A	G	G	G	A	G	A	A
chr1H|HvGBSv2-6596_419697193+15	C/T	1	419697208	+	NA	NA	NA	NA	NA	NA	C	C	T	T	C	T	T	C	C	T	T	C	C	T	C	C	C	C	C	T	C	C	C	C	C	C	C	C	C	C	C	C	C	C	C	C	C	C	C
chr1H|HvGBSv2-6596_419697193+49	T/G	1	419697242	+	NA	NA	NA	NA	NA	NA	G	G	G	G	G	T	T	G	T	T	T	T	G	T	G	G	T	T	T	T	T	G	T	T	T	G	G	G	T	T	G	G	T	T	T	G	T	T	G
chr1H|HvGBSv2-6596_419697193+90	C/A	1	419697283	+	NA	NA	NA	NA	NA	NA	A	A	A	A	A	C	C	A	C	C	C	C	A	C	A	A	C	C	C	C	C	A	C	C	C	A	A	A	C	C	A	A	C	C	C	A	C	C	A
chr1H|HvGBSv2-6596_419697193+91	A/G	1	419697284	+	NA	NA	NA	NA	NA	NA	G	G	G	G	G	A	A	G	A	A	A	A	G	A	G	G	A	A	A	A	A	G	A	A	A	G	G	G	A	A	G	G	A	A	A	G	A	A	G
chr1H|HvGBSv2-6596_419697193+155	A/G	1	419697348	+	NA	NA	NA	NA	NA	NA	A	A	G	G	A	G	G	A	A	G	G	A	A	G	A	A	A	A	A	G	A	A	A	A	A	A	A	A	A	A	A	A	A	A	A	A	A	A	A
chr1H|HvGBSv2-508_419910444+35	G/A	1	419910479	+	NA	NA	NA	NA	NA	NA	G	G	A	A	G	A	A	G	G	A	A	G	G	A	G	G	G	G	G	A	G	G	G	G	G	G	G	G	G	G	G	G	G	G	G	G	G	G	G
chr1H|HvGBSv2-508_419910444+156	C/T	1	419910600	+	NA	NA	NA	NA	NA	NA	C	C	C	C	C	C	C	C	C	C	C	C	C	C	C	C	C	C	C	C	C	C	C	C	C	C	C	C	C	C	C	C	T	C	C	C	C	C	C
chr1H|HvGBSv2-6597_420124927+24	A/G	1	420124951	+	NA	NA	NA	NA	NA	NA	A	A	A	A	A	A	A	A	G	A	A	G	A	A	A	A	G	G	A	A	G	A	G	G	G	A	A	A	G	G	A	A	A	A	G	A	A	A	A
chr1H|HvGBSv2-6597_420124927+35	G/A	1	420124962	+	NA	NA	NA	NA	NA	NA	G	G	A	A	G	A	A	G	G	A	A	G	G	A	G	G	G	G	G	A	G	G	G	G	G	G	G	G	G	G	G	G	G	G	G	G	G	G	G
chr1H|HvGBSv2-6597_420124927+54	T/C	1	420124981	+	NA	NA	NA	NA	NA	NA	T	T	C	C	T	C	C	T	T	C	C	T	T	C	T	T	T	T	T	C	T	T	T	T	T	T	T	T	T	T	T	T	T	T	T	T	T	T	T
chr1H|HvGBSv2-6597_420124927+61	T/C	1	420124988	+	NA	NA	NA	NA	NA	NA	T	T	C	C	T	C	C	T	T	C	C	T	T	C	T	T	T	T	T	C	T	T	T	T	T	T	T	T	T	T	T	T	T	T	T	T	T	T	T
chr1H|HvGBSv2-6597_420124927+74	G/A	1	420125001	+	NA	NA	NA	NA	NA	NA	G	G	A	A	G	A	A	G	G	A	A	G	G	A	G	G	G	G	G	A	G	G	G	G	G	G	G	G	G	G	G	G	G	G	G	G	G	G	G
chr1H|HvGBSv2-6597_420124927+97	G/A	1	420125024	+	NA	NA	NA	NA	NA	NA	G	G	A	A	G	A	A	G	G	A	A	G	G	A	G	G	G	G	G	A	G	G	G	G	G	G	G	G	G	G	G	G	G	G	G	G	G	G	G
chr1H|HvGBSv2-6597_420124927+102	C/T	1	420125029	+	NA	NA	NA	NA	NA	NA	C	C	T	T	C	T	T	C	C	T	T	C	C	T	C	C	C	C	C	T	C	C	C	C	C	C	C	C	C	C	C	C	C	C	C	C	C	C	C
chr1H|HvGBSv2-509_420360972+107	T/A	1	420361079	+	NA	NA	NA	NA	NA	NA	A	A	T	T	A	T	T	A	T	T	T	T	A	T	A	A	T	T	A	T	T	A	T	T	T	A	A	A	T	T	A	A	A	T	T	A	T	A	A
chr1H|HvGBSv2-510_420807466+117	G/T	1	420807583	+	NA	NA	NA	NA	NA	NA	G	G	G	G	G	G	G	G	T	G	G	T	G	G	G	G	T	T	G	G	T	G	T	T	T	G	G	G	T	T	G	G	G	T	T	G	T	G	G
chr1H|HvGBSv2-511_421270067+3	A/C	1	421270070	+	NA	NA	NA	NA	NA	NA	C	A	A	C	A	A	A	C	A	A	A	A	A	A	A	A	A	A	A	A	A	C	A	A	A	A	C	C	A	A	A	C	A	A	A	C	A	A	A
chr1H|HvGBSv2-511_421270067+32	C/T	1	421270099	+	NA	NA	NA	NA	NA	NA	T	C	C	T	C	C	C	T	C	C	C	C	C	C	C	C	C	C	C	C	C	T	C	C	C	C	T	T	C	C	C	T	C	C	C	T	C	C	C
chr1H|HvGBSv2-511_421270067+42	T/A	1	421270109	+	NA	NA	NA	NA	NA	NA	A	T	T	A	T	T	T	A	T	T	T	T	T	T	T	T	T	T	T	T	T	A	T	T	T	T	A	A	T	T	T	A	T	T	T	A	T	T	T
chr1H|HvGBSv2-511_421270067+75	G/A	1	421270142	+	NA	NA	NA	NA	NA	NA	A	G	G	A	G	G	G	A	G	G	G	G	G	G	G	G	G	G	G	G	G	A	G	G	G	G	A	A	G	G	G	A	G	G	G	A	G	G	G
chr1H|HvGBSv2-511_421270067+85	G/A	1	421270152	+	NA	NA	NA	NA	NA	NA	A	A	A	A	G	G	G	A	G	G	G	G	A	G	A	A	G	G	G	G	G	A	G	G	G	G	A	A	G	G	A	A	G	G	G	A	G	G	A
chr1H|HvGBSv2-511_421270067+149	C/T	1	421270216	+	NA	NA	NA	NA	NA	NA	T	T	T	T	C	C	C	T	C	C	C	C	T	C	T	T	C	C	C	C	C	T	C	C	C	C	T	T	C	C	T	T	C	C	C	T	C	C	T
chr1H|HvGBSv2-511_421270067+169	T/C	1	421270236	+	NA	NA	NA	NA	NA	NA	C	T	T	C	T	T	T	C	T	T	T	T	T	T	T	T	T	T	T	T	T	C	T	T	T	T	C	C	T	T	T	C	T	T	T	C	T	T	T
chr1H|HvGBSv2-512_421721796+145	A/G	1	421721941	+	NA	NA	NA	NA	NA	NA	A	A	A	A	A	A	A	A	G	A	A	G	A	A	A	A	G	G	A	A	G	A	G	G	G	A	A	A	G	G	A	A	A	A	G	A	A	A	A
chr1H|HvGBSv2-513_422185032+16	A/G	1	422185048	+	NA	NA	NA	NA	NA	NA	A	R	A	A	A	A	A	A	A	A	A	A	G	A	G	G	A	A	A	A	A	A	A	A	A	A	A	A	A	A	A	A	A	A	A	A	G	A	A
[truncated: 26,781 more rows]
[truncated: 248 more columns]

## Sheet: Phenotypic Data
Genotype	PSH-33	PSH-48	PSH-54	PSH-72	PSH-100	17VA12C	91NE9305
EEB127	3	5	5	6	5	7	7
EEB99	7	7	8	8	9	7	6.67
EEB244	8	8	8	8	9	7	6.67
EEB245	5	6	8	8	8	7	4.83
EEB221	6	6	8	8	6	7	4.46
EEB198	6	8	8	8	9	7	7
EEB241	6	6	8	8	8	7	7
EEB217	7	9	8	9	8	7	5.13
EEB417	2	2	3	5	5	3.17	7
EEB103	7	7	8	8	9	7	NA
EEB429	7	5	7	8	8	7	6.5
EEB438	8	7	8	8	8	7	6.17
EEB274	6	3	6	6	6	1	NA
EEB419	8	5	9	9	9	7	7
EEB454	5	5	8	8	8	7	6.67
EEB418	7	7	8	7	7	3.83	5.17
EEB450	6	5	6	8	9	7	6.67
EEB409	9	7	9	9	8	7	7
EEB223	8	8	8	8	8	7	6.67
EEB195	NA	NA	NA	NA	NA	NA	NA
EEB253	6	7	8	9	8	7	NA
EEB10	3	4	9	8	7	7	3.83
EEB433	8	8	8	8	8	7	4.83
EEB11	7	8	9	8	8	NA	NA
EEB313	NA	NA	NA	NA	NA	NA	NA
EEB153	6	6	8	8	9	7	7
EEB154	7	6	8	8	7	7	7
EEB16	5	6	7	6	7	7	6.67
EEB287	8	7	7	8	7	7	6.83
EEB268	3	5	8	8	8	7	6.67
EEB271	3	4	7	8	7	7	6.83
EEB18	7	7	9	8	9	7	NA
EEB114	8	8	8	8	8	7	7
EEB129	8	8	6	7	6	7	7.17
EEB5	2	2	7	6	6	7	7
EEB425	9	6	9	9	9	7	7
EEB19	6	8	9	7	9	7	6.83
EEB194	4	6	6	8	7	6.5	5.17
EEB155	2	3	6	7	6	6.67	NA
EEB156	4	4	6	7	6	7	5.13
EEB157	8	8	9	8	8	7	6.17
EEB158	7	7	8	7	8	7	7
EEB160	7	6	7	7	7	7	7
EEB394	2	2	5	5	3	7	7
EEB131	6	6	8	9	9	6	5.75
EEB436	8	8	9	8	8	7	7
EEB26	6	2	2	3	8	6.33	2.33
EEB202	NA	NA	NA	NA	NA	NA	NA
EEB440	8	6	9	8	9	6.5	7
EEB193	4	4	3	4	4	2.83	7
EEB28	8	8	9	8	9	7	NA
EEB115	7	6	7	8	8	6.5	5.5
EEB30	7	7	9	9	9	7	7
EEB31	6	5	8	7	7	7	5.17
EEB292	8	9	8	9	8	7	7
EEB161	8	7	7	8	7	6.33	5.13
EEB32	6	6	5	6	8	7	6.5
EEB243	8	8	8	8	8	7	7
EEB34	1	1	5	7	6	7	6.17
EEB35	7	6	9	8	8	7	6.33
EEB200	6	6	8	7	8	7	7
EEB449	4	4	4	5	6	4.17	7
EEB215	7	8	9	8	8	7	NA
EEB17	8	6	9	8	9	7	7
EEB385	5	3	7	8	7	7	7
EEB38	7	6	8	8	8	7	7
EEB391	7	7	7	7	8	7	6.5
EEB163	7	5	8	8	8	7	7.17
EEB164	5	6	6	6	6	7	6.5
EEB144	8	8	9	8	8	7	6.83
EEB39	8	7	3	6	5	7	5.04
EEB24	8	8	9	8	8	7	6.67
EEB400	7	4	8	7	8	7	7
EEB172	7	8	8	8	8	7	7
EEB269	6	7	5	8	7	7	3.29
EEB40	8	8	8	8	9	7	NA
EEB232	7	7	8	8	7	7	5.83
EEB294	8	8	8	9	9	7	6.83
EEB264	8	7	8	8	8	7	7
EEB230	5	8	5	8	6	6.33	6.67
EEB422	2	3	5	6	5	7	7
EEB423	8	8	8	8	8	7	7.17
EEB401	2	2	6	7	6	2.5	6.33
EEB461	8	8	8	8	8	7	7
EEB386	7	6	8	8	9	7	6.67
EEB295	8	8	8	8	9	7	7
EEB42	8	6	9	7	9	7	6.33
EEB227	9	8	8	9	8	6.33	2.33
EEB323	7	6	8	8	9	7	7
EEB324	7	7	8	8	9	7	7
EEB325	8	8	8	9	8	7	6.17
EEB348	7	6	6	7	8	7	3.25
EEB352	8	8	7	8	8	7	4.83
EEB353	7	8	6	8	9	7	5.83
EEB354	8	8	7	8	7	7	3.67
EEB355	8	8	8	8	9	7	6.67
EEB356	8	8	8	9	9	7	7
EEB358	8	8	9	9	9	7	7
EEB431	7	7	7	8	7	NA	7
EEB362	7	8	7	8	8	7	5.67
EEB363	7	7	8	8	8	7	7
EEB364	7	7	8	8	8	7	4.17
EEB365	2	4	5	6	5	7	5.83
EEB366	9	9	8	8	9	6.33	NA
EEB368	3	3	8	8	9	4.58	NA
EEB369	4	4	7	7	7	5.13	NA
EEB370	8	6	8	8	8	7	4
EEB371	8	8	8	8	8	7	4.25
EEB372	7	7	8	8	8	7	5.5
EEB373	8	7	9	9	8	7	5.5
EEB380	2	3	9	9	9	7	NA
EEB326	8	8	8	8	8	6.33	4.17
EEB327	2	6	7	8	7	7	6.17
EEB328	8	9	9	8	8	7	NA
EEB329	8	5	8	8	5	7	7
EEB459	7	7	7	8	8	7	7
EEB460	8	7	8	9	8	7	7
EEB330	2	2	3	5	5	7	7
EEB331	7	7	8	7	9	7	NA
EEB333	6	8	7	9	8	7	5.29
EEB334	7	8	8	9	9	7	7
EEB335	6	6	7	7	7	7	5.17
EEB336	3	4	8	8	8	7	4.5
EEB337	8	8	6	8	9	7	3.71
EEB338	8	8	8	9	8	7	4.67
EEB339	8	7	9	8	9	7	7
EEB340	7	7	7	9	9	NA	NA
EEB342	8	7	8	8	9	7	6.5
EEB343	8	4	8	9	9	7	7
EEB345	8	6	8	8	9	7	7
EEB346	8	6	8	8	9	7	7
EEB347	2	2	3	3	3	6	3.25
EEB43	8	6	9	8	8	7	6.33
EEB437	7	5	9	8	9	7	6.67
EEB182	7	4	6	7	7	7	6.67
EEB224	5	6	9	9	9	7	4.33
EEB233	7	6	8	9	8	6.17	4.83
EEB237	7	7	9	8	8	7	7
EEB443	8	7	9	9	8	7	7
EEB315	3	3	8	9	9	7	7
EEB251	2	3	4	5	5	2.33	6.67
EEB267	3	6	8	8	8	7	5.17
EEB258	7	7	9	8	8	7	7
EEB238	6	7	9	8	9	7	7
EEB96	8	6	8	8	9	7	7
EEB107	5	6	9	9	9	7	NA
EEB108	6	7	8	8	9	7	7
EEB296	8	8	8	8	9	7	7
EEB46	4	3	7	7	4	7	6.33
EEB283	8	7	8	8	8	7	NA
EEB47	7	8	8	8	7	7	6
EEB413	8	7	9	8	9	7	NA
EEB209	5	5	7	8	7	7	2.79
EEB458	6	4	8	8	8	7	5.13
EEB249	4	2	4	6	5	2.25	6.67
EEB239	7	7	8	8	9	7	6.67
EEB49	6	6	8	8	9	NA	NA
EEB106	8	8	9	9	9	7	7
EEB211	5	5	8	8	7	7	7
EEB130	8	8	8	9	8	6.17	2.54
EEB444	7	6	5	6	6	NA	7
EEB255	8	7	6	7	7	2.25	6.67
EEB104	6	6	7	7	8	7	7.17
EEB320	8	7	9	9	9	7	NA
EEB266	6	8	4	8	8	6.5	5.83
EEB179	2	2	3	6	6	2.33	4.04
EEB50	3	7	8	7	8	7	5.17
EEB180	2	2	7	6	6	7	6.67
EEB229	8	6	8	8	7	NA	NA
EEB282	7	7	6	8	6	7	7
EEB51	2	4	8	6	8	7	7
EEB52	8	5	7	7	8	7	5.63
EEB109	8	7	8	8	9	7	7
EEB53	8	8	9	9	9	7	7
EEB148	8	7	8	9	8	7	7.17
EEB225	NA	NA	NA	NA	NA	NA	NA
EEB424	8	7	8	8	9	7	7
EEB212	5	6	4	6	5	2.33	3.88
EEB94	NA	NA	NA	NA	NA	NA	NA
EEB54	8	8	9	9	9	7	6.67
EEB56	8	8	9	9	9	7	6.67
EEB151	8	9	8	9	8	7	6.67
EEB110	7	8	3	8	7	NA	NA
EEB428	8	8	9	9	8	7	4.67
EEB196	8	7	8	8	7	6.17	5.75
EEB192	7	7	9	8	8	7	7
EEB58	8	7	9	9	9	7	6.67
EEB314	3	2	3	2	3	7	7
EEB59	7	6	7	8	9	7	7
EEB297	7	7	8	8	8	7	7
EEB383	8	9	8	8	9	7	6.83
EEB298	8	8	8	8	9	7	7
EEB316	7	6	7	8	9	7	6.67
EEB408	6	6	8	9	8	7	6.5
EEB60	3	3	8	8	9	7	7
EEB101	3	3	7	7	7	7	7
EEB226	7	8	9	9	8	NA	NA
EEB183	8	6	8	9	8	7	5.13
EEB62	8	6	9	8	8	7	6.67
EEB299	8	7	8	9	9	7	7
EEB169	9	8	9	9	8	6.5	7
EEB317	8	7	9	9	8	7	6.5
EEB64	3	6	8	8	8	7	7
EEB63	2	3	1	2	1	NA	5.13
EEB219	5	6	3	8	7	NA	NA
EEB388	3	3	8	9	8	7	7.33
EEB246	9	7	8	8	8	NA	7
EEB203	6	6	4	6	6	2.58	5.83
EEB150	2	1	7	7	5	7	6.67
EEB318	8	7	8	9	7	2.79	6.67
EEB173	7	3	8	8	7	7	7
EEB434	3	4	7	7	7	7	7
EEB146	7	7	9	9	9	7	7.17
EEB122	7	6	9	7	8	7	7
EEB133	8	7	8	9	9	7	7
EEB134	8	7	8	8	7	7	6.67
EEB135	7	8	9	9	9	7	6.67
EEB138	8	7	8	8	8	7	6.5
EEB140	8	8	8	9	8	7	5.5
EEB141	0	2	5	6	5	7	NA
EEB142	8	8	8	7	8	7	7
EEB143	7	6	9	7	7	7	7
EEB92	6	4	9	8	8	2.25	4.63
EEB93	4	5	7	7	7	7	6.17
EEB262	8	7	9	8	8	7	7
EEB312	8	8	9	8	9	7	7
EEB309	8	7	9	9	8	7	7
EEB310	7	7	9	8	9	NA	NA
EEB116	7	6	8	9	8	7	5.17
EEB285	0	1	0	1	0	7	5.67
EEB435	8	8	8	8	8	7	7
EEB280	4	4	3	6	6	5.67	4.29
EEB300	9	8	8	8	9	7	7
EEB67	8	7	9	7	9	7	6.67
EEB213	NA	NA	NA	NA	NA	NA	NA
EEB187	7	6	9	8	8	7	6.67
EEB319	5	5	8	8	8	2.79	5.67
EEB381	5	6	8	8	9	7	6.5
EEB307	8	8	9	8	8	7	NA
EEB68	NA	NA	NA	NA	NA	NA	NA
EEB439	7	5	8	8	8	7	5.83
EEB69	8	8	8	8	9	7	7
EEB254	7	7	8	9	9	7	7
EEB70	6	6	9	6	9	2.5	5.13
EEB234	7	8	8	8	7	7	6.5
EEB181	3	2	6	6	6	2.33	6.67
EEB71	7	6	9	8	8	7	6.5
EEB100	3	7	8	8	9	7	7
EEB392	4	5	8	8	8	7	6.67
EEB72	8	7	8	8	8	7	7
EEB218	8	7	7	9	8	7	7
EEB73	8	7	8	9	9	NA	7
EEB76	6	6	8	8	8	7	2.17
EEB77	2	4	5	6	7	7	NA
EEB321	7	7	8	9	9	7	5.83
EEB189	8	6	9	8	9	7	7
EEB247	6	2	8	9	9	NA	NA
EEB78	8	5	7	8	8	7	7
EEB79	8	8	9	8	9	7	7
EEB98	8	7	9	9	9	7	6
EEB231	7	7	7	8	7	6.33	6.33
EEB80	8	6	9	8	9	7	7
EEB288	3	6	8	8	7	6.5	5.17
EEB81	8	7	9	9	9	7	6.67
EEB82	7	7	8	8	9	NA	NA
EEB83	8	4	8	9	9	7	6.83
EEB84	4	4	5	6	5	7	5.33
EEB166	8	6	9	9	8	7	5.67
EEB167	8	7	9	9	8	7	NA
EEB87	8	7	5	8	7	7	5.83
EEB414	8	5	9	9	9	7	3.33
EEB216	8	8	8	8	9	7	NA
EEB210	8	8	8	8	8	7	NA
EEB235	7	6	9	8	8	6.83	5
EEB86	3	3	8	8	8	7	7
EEB242	8	5	9	9	8	7	7
EEB145	8	8	9	9	9	7	7.17
EEB186	8	8	9	8	8	7	7
EEB88	8	8	8	8	8	7	7
EEB89	4	6	8	7	8	7	6.17
EEB105	3	5	8	8	8	7	7
EEB90	7	7	8	8	9	7	6.67
EEB301	9	9	8	9	9	7	7
EEB177	3	2	7	7	8	7	7
EEB91	7	7	8	8	9	7	4.63
EEB407	6	7	8	8	8	6.67	5.33
EEB220	8	5	8	8	9	NA	NA
