# Supplementary material for: Mining the Australian Grains Gene Bank for Rust Resistance in Barley
Source: Int J Mol Sci. 2023 Jun 29;24(13):10860. doi: 10.3390/ijms241310860 (PMC10342048; doi:10.3390/ijms241310860)
Supplement: Supplementary file 1 [file ijms-24-10860-s001.zip › Table S2.xlsx]

## Sheet: 5H
Supplemental Table 2: Disease resistance genes at the Chromosome 5H loci in MorexV3
Gene_ID	Chr	Start	End	Strand	Description
HORVU.MOREX.r3.4HG0401630.1	chr4H	556710845	556713972	+	Protein kinase
HORVU.MOREX.r3.4HG0401890.1	chr4H	557865581	557874072	+	Kinase family protein
HORVU.MOREX.r3.4HG0402000.1	chr4H	558716175	558725996	-	Kinase interacting (KIP1-like) family protein
HORVU.MOREX.r3.4HG0402600.1	chr4H	561210026	561213048	+	5-dehydro-2-deoxygluconokinase
HORVU.MOREX.r3.4HG0402600.2	chr4H	561210079	561212887	+	5-dehydro-2-deoxygluconokinase
HORVU.MOREX.r3.4HG0403090.1	chr4H	563277626	563278333	-	mitogen-activated protein kinase 1
HORVU.MOREX.r3.5HG0510050.1	chr5H	525810761	525815155	+	Kinase-like protein
HORVU.MOREX.r3.5HG0510390.1	chr5H	526705224	526708467	-	Receptor-like kinase
HORVU.MOREX.r3.5HG0510400.1	chr5H	526708938	526711065	+	Receptor-like kinase
HORVU.MOREX.r3.5HG0510440.1	chr5H	526767286	526770844	+	Protein kinase family protein
HORVU.MOREX.r3.5HG0510630.1	chr5H	527053362	527056792	-	Receptor-like protein kinase
HORVU.MOREX.r3.5HG0510760.1	chr5H	527202719	527213076	-	Protein kinase
HORVU.MOREX.r3.5HG0511290.1	chr5H	528474100	528474773	+	protein kinase family protein
HORVU.MOREX.r3.5HG0511440.1	chr5H	528891674	528900419	+	Kinase family protein
HORVU.MOREX.r3.5HG0511490.1	chr5H	529085642	529090702	-	Receptor-like kinase
HORVU.MOREX.r3.5HG0511790.1	chr5H	529688151	529692066	-	WRKY transcription factor
HORVU.MOREX.r3.5HG0511960.1	chr5H	530070660	530073688	+	Disease resistance protein RPM1
HORVU.MOREX.r3.5HG0511970.1	chr5H	530161606	530163230	+	Disease resistance protein (TIR-NBS-LRR class) family
HORVU.MOREX.r3.5HG0512000.1	chr5H	530222006	530225246	+	Disease resistance protein
HORVU.MOREX.r3.5HG0512150.1	chr5H	530322746	530330050	+	Protein kinase family protein
HORVU.MOREX.r3.5HG0512210.1	chr5H	530586124	530599463	+	WRKY transcription factor
HORVU.MOREX.r3.5HG0512230.1	chr5H	530656415	530659351	-	Protein ENHANCED DISEASE RESISTANCE 2-like
HORVU.MOREX.r3.5HG0512250.1	chr5H	530677569	530680349	-	Receptor-like kinase
HORVU.MOREX.r3.5HG0512300.1	chr5H	530851756	530852429	-	protein kinase family protein
HORVU.MOREX.r3.5HG0512370.1	chr5H	530995927	531000739	-	Kinase family protein
HORVU.MOREX.r3.5HG0512550.1	chr5H	531590829	531596595	-	Protein kinase
HORVU.MOREX.r3.5HG0512680.1	chr5H	532071828	532077088	+	Protein kinase
HORVU.MOREX.r3.5HG0512750.1	chr5H	532351342	532359664	-	Kinase
HORVU.MOREX.r3.5HG0512820.1	chr5H	532600476	532606853	+	Kinase family protein
HORVU.MOREX.r3.5HG0512860.1	chr5H	532853161	532857933	+	Kinase family protein
HORVU.MOREX.r3.5HG0513630.1	chr5H	535365636	535367831	-	Lectin receptor kinase
HORVU.MOREX.r3.5HG0513770.1	chr5H	535745200	535749657	-	Receptor protein kinase-like protein
HORVU.MOREX.r3.5HG0513800.1	chr5H	535798395	535802447	+	Non-specific serine/threonine protein kinase
HORVU.MOREX.r3.5HG0514140.1	chr5H	536601539	536602212	+	protein kinase family protein
HORVU.MOREX.r3.5HG0514150.1	chr5H	536624197	536626753	-	Receptor-like kinase
HORVU.MOREX.r3.5HG0514590.1	chr5H	537664711	537667733	+	NBS-LRR disease resistance protein
HORVU.MOREX.r3.5HG0515520.1	chr5H	539450520	539454361	-	Receptor protein kinase
HORVU.MOREX.r3.5HG0515740.1	chr5H	539747026	539747700	-	LRR receptor-like serine/threonine-protein kinase EFR
HORVU.MOREX.r3.5HG0516270.1	chr5H	540732045	540733230	-	Cysteine-rich receptor-kinase-like protein
